# Supplementary material
Source: PubMed Central journal article supplement (PMC6121218)

Supporting Information

**Highly Efficient and Stereoselective Thioallylation of Alkynes:  
Possible Gold Redox Catalysis with No Need for a Strong Oxidant**

*Jin Wang, Shuyao Zhang, Chang Xu, Lukasz Wojtas, Novruz G. Akhmedov, Hao Chen, and Xiaodong Shi\**

anie\_201802540\_sm\_miscellaneous\_information.pdf

## Supporting Information

|                                                |     |
|------------------------------------------------|-----|
| I. General Methods and Materials.....          | S2  |
| II. General Procedures.....                    | S2  |
| III. ORTEP Drawing for Crystal Structures..... | S9  |
| IV. Mass Spectrometry Study.....               | S11 |
| V. NMR Study.....                              | S21 |
| VI. Compound Characterization.....             | S26 |
| VII. NMR Spectra.....                          | S50 |

## I. General Methods and Materials

All of the reactions dealing with air and/or moisture-sensitive compounds were carried out under an atmosphere of argon using oven/flame-dried glassware and standard syringe/septa techniques. Unless otherwise noted, all commercial reagents and solvents were obtained from the commercial provider and used without further purification. Allyl sulfides, bromo-alkynes and chloro-alkynes were prepared according to literature reports.

$^1\text{H}$  NMR,  $^{13}\text{C}$  NMR and  $^{19}\text{F}$  NMR spectra were recorded on a Varian Inova400 MHz spectrometer. Chemical shifts were reported relative to internal tetramethylsilane ( $\delta$  0.00 ppm) for  $^1\text{H}$  and  $\text{CDCl}_3$  ( $\delta$  77.0 ppm) for  $^{13}\text{C}$ . Flash column chromatography was performed on 230-430 mesh silica gel. Analytical thin layer chromatography was performed with pre-coated glass baked plates (250 $\mu$ ) and visualized by fluorescence and by charring after treatment with potassium permanganate stain. HRMS data for substrates in **Table 2** were collected on an Agilent 6540 LC/QTOF spectrometer in the mass-spec facility in the University of South Florida. The rest of the HRMS data were collected in Ohio University on a Thermo Scientific Orbitrap Q Extractive Plus (Bremen, Germany) in the positive ion mode. For mechanistic studies using ESI-MS, the same MS instrument in Ohio University was used, and the samples were infused with a flow rate of 10  $\mu\text{L}/\text{min}$  and sprayed at a high voltage of 5 kV. For compounds **5**, **6**, **7**, **8** and **10**, 1% IPrAuNTf<sub>2</sub> was added into a 0.01M solution of substrates in order to help the ionization for HRMS detection. The X-ray diffraction data for **3c** was measured on Bruker D8 Venture PHOTON 100 CMOS system.

## II. General Procedures

### 2.1 Cross-over experiment for thioallylation with thioalkynes

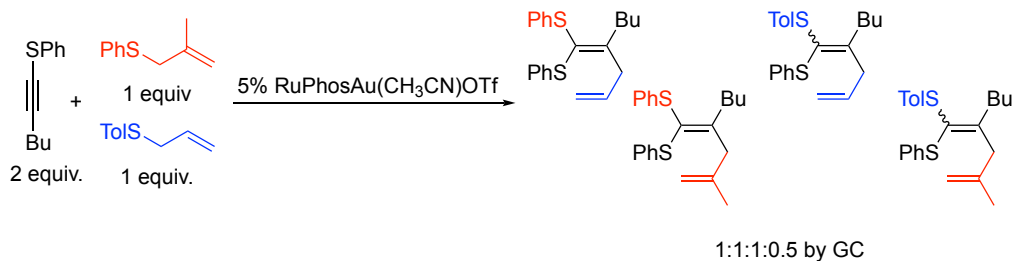

To a 1mL DCE solution of thioalkyne (0.2 mmol) and two different sulfides (0.1 mmol each) was added RuPhosAu(CH<sub>3</sub>CN)OTf catalyst (0.05 equiv.). The reaction was allowed to stir at 60 °C for 12 h. The crude mixture was analyzed using GC-MS.

# Qualitative Analysis Report

|                               |                |                      |                     |
|-------------------------------|----------------|----------------------|---------------------|
| <b>Data Filename</b>          | JW-1-81.D      | <b>Sample Name</b>   | JW-1-81             |
| <b>Sample Type</b>            |                | <b>Position</b>      | 15                  |
| <b>Instrument Name</b>        | GCMS           | <b>User Name</b>     | GCMS\admin          |
| <b>Acq Method</b>             | Rong.M         | <b>Acquired Time</b> | 6/5/2017 7:39:50 PM |
| <b>IRM Calibration Status</b> | Not Applicable | <b>DA Method</b>     | default.m           |
| <b>Comment</b>                |                |                      |                     |

**Expected Barcode**

**Sample Amount**

|                     |                           |                          |         |
|---------------------|---------------------------|--------------------------|---------|
| <b>Dual Inj Vol</b> | 1                         | <b>TuneName</b>          | ATUNE.U |
| <b>TunePath</b>     | D:\MassHunter\GCMS\1\5977 | <b>MSFirmwareVersion</b> | 6.00.16 |
| <b>OperatorName</b> | GCMS\admin                | <b>RunCompletedFlag</b>  | True    |

## User Chromatograms

**Fragmentor Voltage**      **Collision Energy** 0      **Ionization Mode** Unspecified

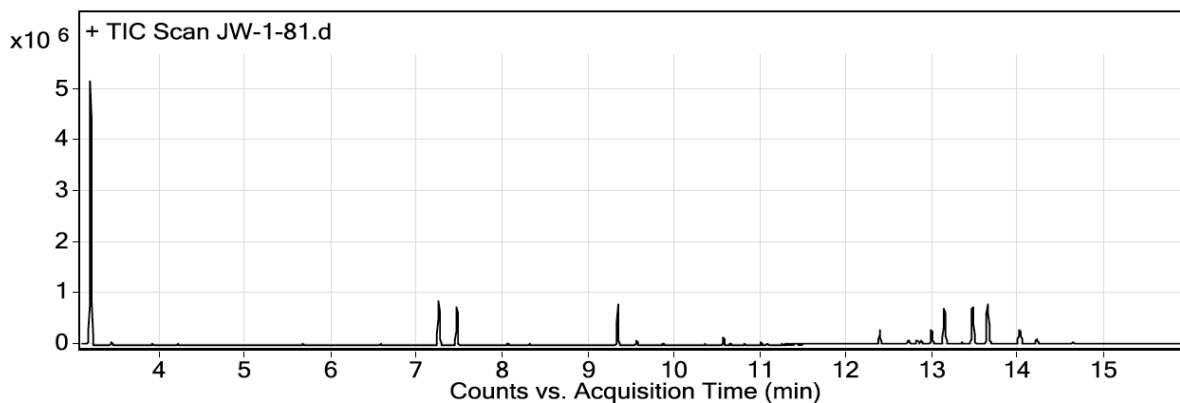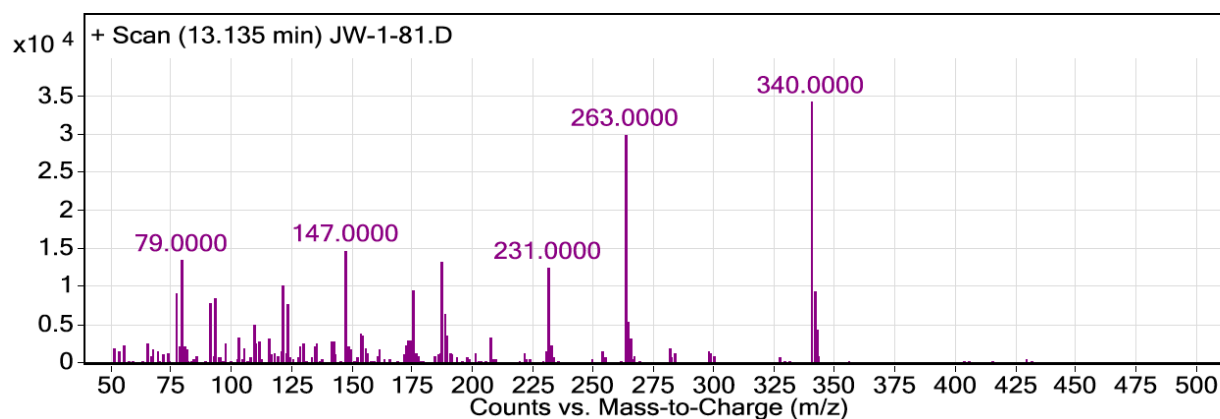

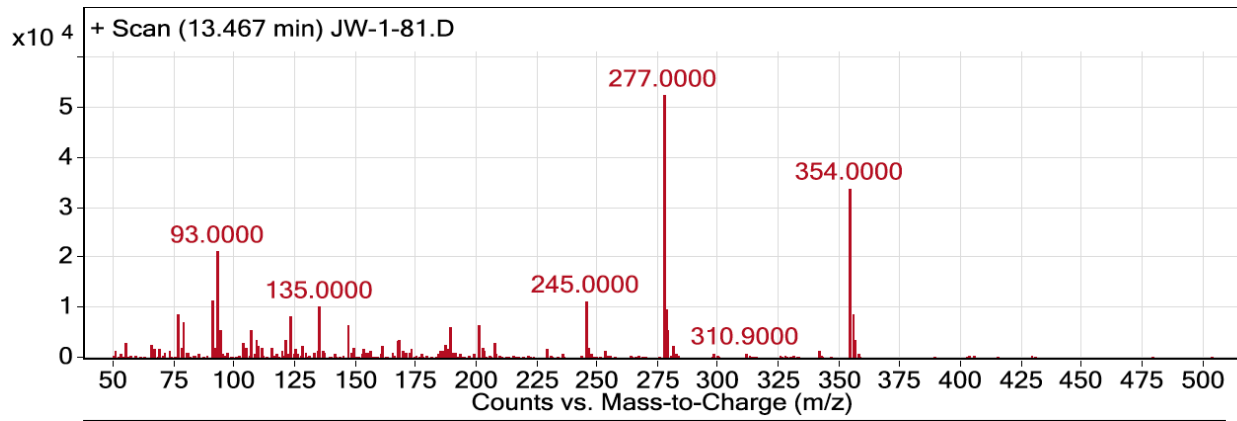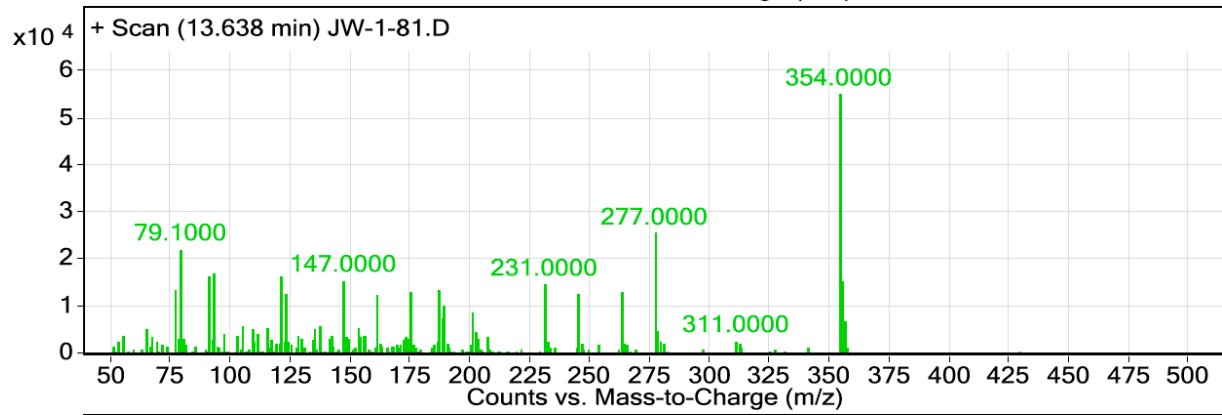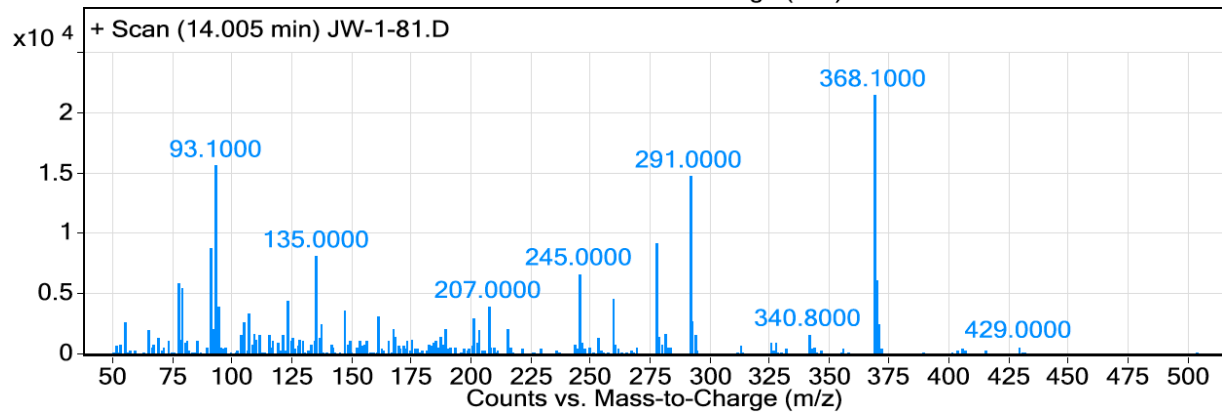

## 2.2 Reaction Optimization

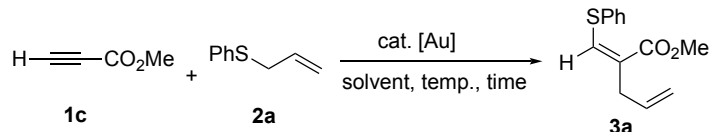

| entry                 | cat.                                             | solvent            | conc.       | time        | conv.       | yield      | <i>E/Z</i>           |
|-----------------------|--------------------------------------------------|--------------------|-------------|-------------|-------------|------------|----------------------|
| <b>1</b>              | 5% JohnPhosAuNTf <sub>2</sub>                    | DCE                | 0.1M        | 10 h        | 100%        | 78%        | 2:3                  |
| <b>2</b>              | 5% JohnPhosAu(CH <sub>3</sub> CN)OTf             | DCE                | 0.1M        | 10 h        | 100%        | 93%        | <i>Z</i> only        |
| <b>3</b>              | 5% RuPhosAuNTf <sub>2</sub>                      | DCE                | 0.1M        | 10 h        | 100%        | 81%        | 1:3                  |
| <b>4</b>              | 5% <i>t</i> -Bu <sub>3</sub> PAuNTf <sub>2</sub> | DCE                | 0.1M        | 10 h        | 100%        | 92%        | <i>Z</i> only        |
| <b>5</b>              | 5% (PhO) <sub>3</sub> PAu(TA-Ph)OTf              | DCE                | 0.1M        | 10 h        | 100%        | 93%        | <i>Z</i> only        |
| <b>6</b>              | 5% IPrAuNTf <sub>2</sub>                         | DCE                | 0.1M        | 10 h        | 100%        | 93%        | <i>Z</i> only        |
| <b>7</b>              | 5% IPrAuCl                                       | DCE                | 0.1M        | 10 h        | <5%         | 0%         | -                    |
| <b>8</b>              | 5% JohnPhosAu(TA-H)OTf                           | DCE                | 0.1M        | 10 h        | 91%         | 87%        | <i>Z</i> only        |
| <b>9</b>              | 5% di- <i>t</i> -BuXPhosAuNTf <sub>2</sub>       | DCE                | 0.1M        | 10 h        | 100%        | 63%        | 1:2                  |
| <b>10</b>             | 5% PPh <sub>3</sub> Au(TA-Me)OTf                 | DCE                | 0.1M        | 10 h        | 90%         | 87%        | <i>Z</i> only        |
| <b>11</b>             | 5% IPrAu(TA-H)OTf                                | DCE                | 0.1M        | 10 h        | 25%         | 15%        | <i>Z</i> only        |
| <b>12</b>             | DavePhosAuNTf <sub>2</sub>                       | DCE                | 0.1M        | 10 h        | 43%         | 33%        | <i>Z</i> only        |
| <b>13</b>             | 5% JohnPhosAuNTf <sub>2</sub>                    | toluene            | 0.1M        | 10 h        | 100%        | 80%        | 2:3                  |
| <b>14</b>             | 5% JohnPhosAu(CH <sub>3</sub> CN)OTf             | toluene            | 0.1M        | 10 h        | 100%        | 85%        | <i>Z</i> only        |
| <b>15</b>             | 5% RuPhosAuNTf <sub>2</sub>                      | toluene            | 0.1M        | 10 h        | 100%        | 79%        | 1:3                  |
| <b>16</b>             | 5% PPh <sub>3</sub> AuNTf <sub>2</sub>           | toluene            | 0.1M        | 10 h        | 100%        | 80%        | 2:3                  |
| <b>17</b>             | 5% <i>t</i> -Bu <sub>3</sub> PAuNTf <sub>2</sub> | toluene            | 0.1M        | 10 h        | 100%        | 92%        | <i>Z</i> only        |
| <b>18</b>             | 5% IPrAuNTf <sub>2</sub>                         | toluene            | 0.1M        | 10 h        | 100%        | 96%        | <i>Z</i> only        |
| <b>19</b>             | 5% IPrAuNTf <sub>2</sub>                         | THF                | 0.1M        | 40 h        | 82%         | 78%        | <i>Z</i> only        |
| <b>20</b>             | 5% IPrAuNTf <sub>2</sub>                         | CH <sub>3</sub> CN | 0.1M        | 40 h        | 78%         | 72%        | <i>Z</i> only        |
| <b>21</b>             | 2% IPrAuNTf <sub>2</sub>                         | toluene            | 0.1M        | 20 h        | 88%         | 84%        | <i>Z</i> only        |
| <b>22</b>             | 2% IPrAuNTf <sub>2</sub>                         | toluene            | 0.2M        | 10 h        | 100%        | 96%        | <i>Z</i> only        |
| <b>23</b>             | 1% IPrAuNTf <sub>2</sub>                         | toluene            | 0.1M        | 20h         | 69%         | 66%        | <i>Z</i> only        |
| <b>24</b>             | 1% IPrAuNTf <sub>2</sub>                         | toluene            | 0.2M        | 20 h        | 100%        | 96%        | <i>Z</i> only        |
| <b>25</b>             | <b>1% IPrAuNTf<sub>2</sub></b>                   | <b>toluene</b>     | <b>0.5M</b> | <b>10 h</b> | <b>100%</b> | <b>98%</b> | <b><i>Z</i> only</b> |
| <b>26</b>             | 1% IPrAuNTf <sub>2</sub>                         | toluene            | 1.0M        | 5 h         | 100%        | 92%        | <i>Z</i> only        |
| <b>27</b>             | 0.5% IPrAuNTf <sub>2</sub>                       | toluene            | 1.0M        | 10 h        | 100%        | 95%        | <i>Z</i> only        |
| <b>28</b>             | 0.2% IPrAuNTf <sub>2</sub>                       | toluene            | 1.0M        | 40 h        | 81%         | 73%        | <i>Z</i> only        |
| <b>29</b>             | 0.1% IPrAuNTf <sub>2</sub>                       | toluene            | 1.0M        | 40 h        | 63%         | 60%        | <i>Z</i> only        |
| <b>30<sup>a</sup></b> | 1% IPrAuNTf <sub>2</sub>                         | toluene            | 0.5M        | 40 h        | 93%         | 88%        | <i>Z</i> only        |
| <b>31<sup>b</sup></b> | 1% IPrAuNTf <sub>2</sub>                         | toluene            | 0.5M        | 40 h        | 47%         | 42%        | <i>Z</i> only        |
| <b>32<sup>c</sup></b> | 1% IPrAuNTf <sub>2</sub>                         | toluene            | 0.5M        | 20 h        | 100%        | 88%        | 1:17                 |
| <b>33<sup>d</sup></b> | 1% IPrAuNTf <sub>2</sub>                         | toluene            | 0.5M        | 40 h        | 94%         | 74%        | 1:8                  |

Reaction conditions: gold catalyst was added to a solution (1 mL) of alkyne **1c** (0.15 mmol) and allyl sulfide **2a** (0.1 mmol), and reaction was kept at 60 °C for specified time. Conversion and yield were determined by <sup>1</sup>H NMR spectroscopy using dimethylsulfone as internal standard. <sup>a</sup> reaction at 40 °C. <sup>b</sup> reaction at rt. <sup>c</sup> reaction with 1.2 eq alkyne **1c**. <sup>d</sup> reaction with 1.1 eq alkyne **1c**.

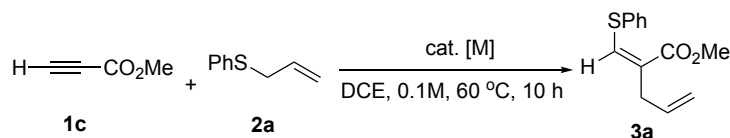

| entry | cat.                                               | conv. | yield |
|-------|----------------------------------------------------|-------|-------|
| 1     | 5% IPrAuNTf <sub>2</sub>                           | 100%  | 93%   |
| 2     | none                                               | <5%   | 0%    |
| 3     | TfOH                                               | 20%   | 0%    |
| 4     | AgOTf                                              | <5%   | 0%    |
| 5     | AgNTf <sub>2</sub>                                 | <5%   | 0%    |
| 6     | Cu(OTf) <sub>2</sub>                               | <5%   | 0%    |
| 7     | In(OTf) <sub>3</sub>                               | <5%   | trace |
| 8     | FeCl <sub>3</sub>                                  | <5%   | trace |
| 9     | Zn(OTf) <sub>2</sub>                               | <5%   | 0%    |
| 10    | Cp <sub>2</sub> TiCl <sub>2</sub>                  | <5%   | 0%    |
| 11    | La(OTf) <sub>3</sub>                               | <5%   | 0%    |
| 12    | Rh <sub>2</sub> (esp) <sub>2</sub>                 | <5%   | 0%    |
| 13    | Pd(PPh <sub>3</sub> ) <sub>2</sub> Cl <sub>2</sub> | <5%   | 0%    |
| 14    | Pd(OAc) <sub>2</sub>                               | <5%   | 0%    |
| 15    | Cp <sub>2</sub> RuCl <sub>2</sub>                  | <5%   | 0%    |
| 16    | (cod) <sub>2</sub> Ir <sub>2</sub> Cl <sub>2</sub> | <5%   | 0%    |

Reaction conditions: metal catalyst was added to a solution (1 mL) of alkyne **1c** (0.15 mmol) and allyl sulfide **2a** (0.1 mmol), and reaction was kept at 60 °C for 10 h. Conversion and yield were determined by <sup>1</sup>H NMR spectroscopy using dimethylsulfone as internal standard.

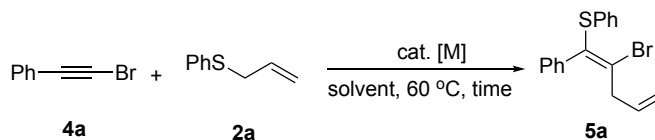

| entry     | cat.                                 | solvent        | conc.       | time        | conv.       | yield      | E/Z           |
|-----------|--------------------------------------|----------------|-------------|-------------|-------------|------------|---------------|
| <b>1</b>  | 5% JohnPhosAuNTf <sub>2</sub>        | DCE            | 0.1M        | 24 h        | <20%        | 7%         | -             |
| <b>2</b>  | 5% JohnPhosAu(CH <sub>3</sub> CN)OTf | DCE            | 0.1M        | 24 h        | <20%        | <5%        | -             |
| <b>3</b>  | 5% (PhO) <sub>3</sub> PAu(TA-Ph))OTf | DCE            | 0.1M        | 24 h        | <20%        | 13%        | Z only        |
| <b>4</b>  | 5% AgOTf                             | DCE            | 0.1M        | 24 h        | <5%         | 0%         | -             |
| <b>5</b>  | 5% Cu(OTf) <sub>2</sub>              | DCE            | 0.1M        | 24 h        | <5%         | 0%         | -             |
| <b>6</b>  | none                                 | DCE            | 0.1M        | 24 h        | <5%         | 0%         | -             |
| <b>7</b>  | 5% IPrAuNTf <sub>2</sub>             | DCE            | 0.1M        | 24 h        | 80%         | 66%        | Z only        |
| <b>8</b>  | 5% IPrAuNTf <sub>2</sub>             | toluene        | 0.1M        | 24 h        | 82%         | 74%        | Z only        |
| <b>9</b>  | 2% IPrAuNTf <sub>2</sub>             | toluene        | 0.3M        | 24 h        | 100%        | 84%        | Z only        |
| <b>10</b> | <b>2% IPrAuNTf<sub>2</sub></b>       | <b>toluene</b> | <b>0.5M</b> | <b>24 h</b> | <b>100%</b> | <b>97%</b> | <b>Z only</b> |

Reaction conditions: gold catalyst was added to a solution (1 mL) of alkyne **4a** (0.15 mmol) and allyl sulfide **2a** (0.1 mmol), and reaction was kept at 60 °C for specified time. Conversion and yield were determined by <sup>1</sup>H NMR spectroscopy using dimethylsulfone as internal standard.

## 2.3 General procedure for thioallylation of carbonyl-activated alkynes

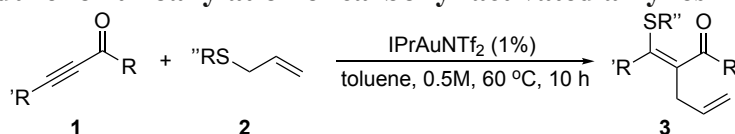

To a toluene solution (0.6 mL) of sulfide **2** (0.3 mmol, 1 eq) and carbonyl-activated alkyne **1** (0.45 mmol, 1.5 eq) was added IPrAuNTf<sub>2</sub> catalyst (0.003 mmol, 0.01 eq) in one portion. The reaction mixture was allowed to stir at 60 °C for 10 h. The reaction mixture was then concentrated by rot-vap, and purified by flash chromatography (20:1 hex/EtOAc) to obtain pure product **3**.

## 2.4 Gram-scale synthesis of 3a

To a toluene solution (2.5 mL) of sulfide **2a** (773 μL, 5.0 mmol, 1 eq) and carbonyl-activated alkyne **1c** (667 μL, 7.5 mmol, 1.5 eq) was added IPrAuNTf<sub>2</sub> catalyst (4.3 mg, 0.005 mmol, 0.001 eq) in one portion. The reaction mixture was allowed to stir at 60 °C for 48 h. The reaction mixture was then concentrated by rot-vap, and purified by flash chromatography (20:1 hex/EtOAc) to obtain pure product **3** (1.114 g, 95%).

## 2.5 General procedure for thioallylation of halo-alkynes

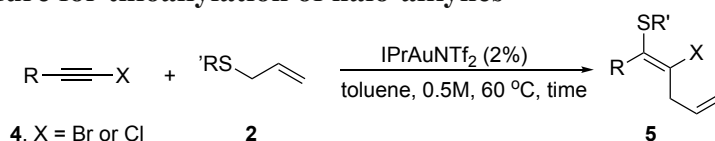

To a toluene solution (0.4 mL) of sulfide **2** (0.2 mmol, 1eq) and halo-alkyne **4** (0.3 mmol, 1.5 eq) was added IPrAuNTf<sub>2</sub> catalyst (0.004 mmol, 0.02 eq) in one portion. The reaction mixture was allowed to stir at 60 °C for 24 h. The reaction mixture was then concentrated by rot-vap, and purified by preparative TLC (pure hexane) to obtain pure product **5**.

## 2.6 General procedure for the synthesis of homopropargyl allyl sulfide 6a-6l

### General Procedure for the synthesis of compound 6

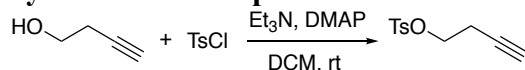

To a 500 mL round bottom flask was added 3-butyn-1-ol (7.01 g, 100 mmol, 1 eq), DCM (200 mL), DMAP (1.22 g, 10 mmol, 0.1 eq), Et<sub>3</sub>N (42 mL, 3 eq) and TsCl (22.88 g, 120 mmol, 1.2 eq) sequentially. The reaction system was stirred vigorously at room temperature for 3h. After the reaction was completed (determined by TLC), the reaction mixture was quenched with water and extracted with DCM. Combined organic layer was dried with Na<sub>2</sub>SO<sub>4</sub>. The solvent was removed under reduced pressure and crude product was purified by column chromatography (5:1 hexane/EtOAc) to give the desired product as a colorless oil.

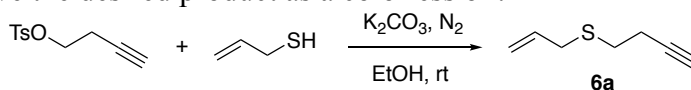

To a mixture of 3-butyn-1-yl-4-methylbenzenesulfonate (10.51 g, 50 mmol, 1 eq) and K<sub>2</sub>CO<sub>3</sub> (10.35 g, 75 mmol, 1.5 eq) under argon atmosphere in 250 mL round bottom flask, ethanol (100 mL) and allyl mercaptan (5 mL, 1.2 eq) was added. The reaction mixture was stirred at room temperature for 24h. After the reaction was completed (determined by TLC), 200 mL water was added, and organic layer was collected. The water layer was extract with hexane for several times, then the combined organic layer was dried with Na<sub>2</sub>SO<sub>4</sub>. The solvent was removed under reduced



pressure and purified by column chromatography (40:1 hexane/EtOAc) to give the desired product **6a** as a colorless oil.

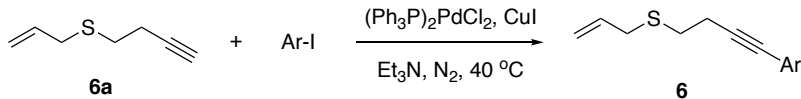

To a mixture of Pd(PPh<sub>3</sub>)<sub>2</sub>Cl<sub>2</sub> (42.1 mg, 0.06 mmol, 0.02 eq) and CuI (22.9 mg, 0.12 mmol, 0.04 eq) under N<sub>2</sub> atmosphere, Et<sub>3</sub>N (10 mL), iodoarenes (3 mmol, 1 eq) and **6a** (378.7 mg, 3 mmol, 1 eq) was added sequentially. The reaction mixture was stirred at 40 °C for 16 h. After the reaction was completed (determined by TLC), the reaction mixture was filtered and washed with ethyl acetate. The filtrate was evaporated under reduced pressure and purified by column chromatography to give the desired product **6b-6l**.

## 2.7 General procedure for intramolecular thioallylation

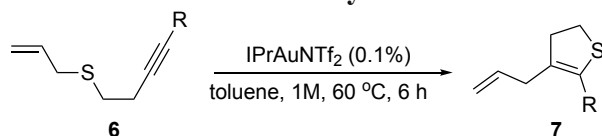

To a toluene solution (0.3 mL) of sulfide **6** (0.3 mmol, 1 eq) was added IPrAuNTf<sub>2</sub> catalyst (0.0003 mmol, 0.001 eq) in one portion. The reaction mixture was allowed to stir at 60 °C for 6 h or 24 h. The reaction mixture was then concentrated by rot-vap, and purified by preparative TLC (pure hexane) to obtain pure product **7**.

## 2.8 General procedure for thioflavone **8** synthesis from **3t**

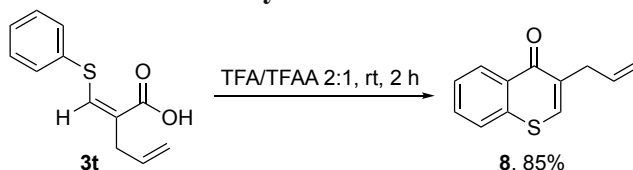

To a 2:1 TFAA/TFA mixed solution (1.5 mL) was added compound **3t** (110 mg, 0.50 mmol). The reaction mixture was allowed to stir at rt for 2 h. The reaction mixture was then concentrated by rot-vap, and purified by flash chromatography (pure hexane) to obtain pure product **8** (86 mg, 85%).

## 2.9 General procedure for sulfone **9** synthesis from **5a**

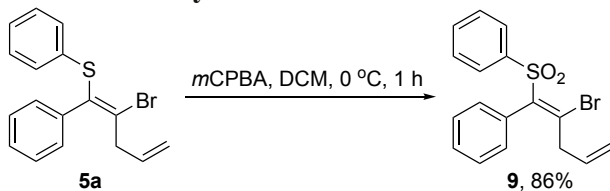

To a DCM solution (2 mL) of sulfide **5a** (132 mg, 0.4 mmol, 1 eq) was added mCPBA (197 mg, 0.8 mmol, 2 eq) in one portion at 0 °C. After reacting at 0 °C for 1 h, the reaction mixture was diluted with DCM and washed with NaHCO<sub>3</sub> solution twice. The organic layer was dried with Na<sub>2</sub>SO<sub>4</sub> and concentrated by rot-vap. The crude product was purified by flash chromatography (3:1 hexane/EtOAc) to yield the desired product **9** (118 mg, 86%).

## 2.10 General procedure for Suzuki coupling of **5a**

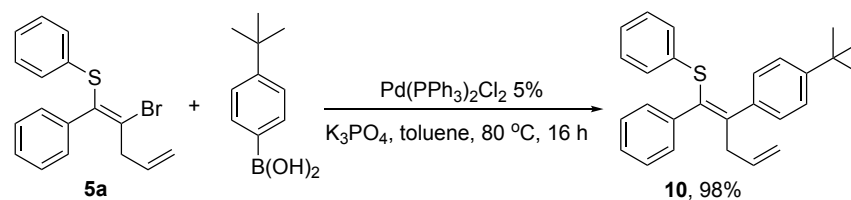

To a Schlenk tube was added **5a** (132 mg, 0.4 mmol, 1 eq), boronic acid (214 mg, 1.2 mmol, 3 eq), Pd(PPh<sub>3</sub>)<sub>2</sub>Cl<sub>2</sub> (14 mg, 0.02 mmol, 0.05 eq) and K<sub>3</sub>PO<sub>4</sub> (255 mg, 1.2 mmol, 3 eq) sequentially. The reaction mixture was transferred into glove box and charged with toluene (2 mL). After reacting for 16 h at 80 °C, the reaction was quenched with diluted with DCM and extracted with H<sub>2</sub>O twice. The organic layer was dried with Na<sub>2</sub>SO<sub>4</sub> and concentrated. Crude mixture was purified by flash chromatography (pure hexane) to yield the desired product **10** (152 mg, 98%).

### III. ORTEP Drawing for Crystal Structures

#### X-ray Crystallography

The X-ray diffraction data were measured on Bruker D8 Venture PHOTON 100 CMOS system equipped with a Cu K<sub>α</sub> INCOATEC ImuS micro-focus source ( $\lambda = 1.54178 \text{ \AA}$ ). Indexing was performed using Apex3 [1]. Data integration and reduction were performed using SaintPlus 6.01 [2]. Absorption correction was performed by multi-scan method implemented in SADABS [3]. Space group was determined using XPREP implemented in APEX3 [1]. Structure was solved using SHELXT [4] and refined using SHELXL-2017 [5-7] (full-matrix least-squares on F<sup>2</sup>) through OLEX2 interface program [8]. All non-hydrogen atoms were refined anisotropically. Hydrogen atoms were placed in geometrically calculated positions and were included in the refinement process using riding model with isotropic thermal parameters. Crystal data and refinement conditions are shown in Table 1.

[1] Bruker (2017). *APEX3* (Version 2015.9). Bruker AXS Inc., Madison, Wisconsin, USA.

[2] Bruker (2017) SAINT V8.35A. Data Reduction Software.

[3] Sheldrick, G. M. (1996). *SADABS. Program for Empirical Absorption Correction*. University of Gottingen, Germany.

[4] Sheldrick, G. M. (2015) "SHELXT - Integrated space-group and crystal structure determination" *Acta Cryst.* A71, 3-8

[5] Sheldrick, G.M. (1990) *Acta Cryst.* A46, 467-473

[6] Sheldrick, G. M. (2008) *Acta Cryst.* A64, 112-122.

[7] G.M. Sheldrick (2015) "Crystal structure refinement with SHELXL", *Acta Cryst.*, C71, 3-8

[8] Dolomanov, O.V.; Bourhis, L.J.; Gildea, R.J.; Howard, J.A.K.; Puschmann, H., OLEX2: A complete structure solution, refinement and analysis program (2009). *J. Appl. Cryst.*, 42, 339-341.

[9] A.L.Spek, *Acta Cryst.* 2009, D65, 148-155.

[10] R. W. W. Hooft, L. H. Straver, A. L. Spek *J. Appl. Cryst.* (2008), 41, 96-103

| <b>Table 1 Crystal data and structure refinement for Z1_6_4.</b> |                                                               |
|------------------------------------------------------------------|---------------------------------------------------------------|
| Identification code                                              | Z1_6_4                                                        |
| Empirical formula                                                | C <sub>13</sub> H <sub>13</sub> BrO <sub>2</sub> S            |
| Formula weight                                                   | 313.20                                                        |
| Temperature/K                                                    | 100.01                                                        |
| Crystal system                                                   | orthorhombic                                                  |
| Space group                                                      | Pbca                                                          |
| a/Å                                                              | 9.4379(4)                                                     |
| b/Å                                                              | 7.6208(3)                                                     |
| c/Å                                                              | 36.1062(13)                                                   |
| α/°                                                              | 90                                                            |
| β/°                                                              | 90                                                            |
| γ/°                                                              | 90                                                            |
| Volume/Å <sup>3</sup>                                            | 2596.91(18)                                                   |
| Z                                                                | 8                                                             |
| ρ <sub>calc</sub> /cm <sup>3</sup>                               | 1.602                                                         |
| μ/mm <sup>-1</sup>                                               | 5.716                                                         |
| F(000)                                                           | 1264.0                                                        |
| Crystal size/mm <sup>3</sup>                                     | 0.217 × 0.136 × 0.036                                         |
| Radiation                                                        | CuKα (λ = 1.54178)                                            |
| 2θ range for data collection/°                                   | 9.798 to 154.634                                              |
| Index ranges                                                     | -11 ≤ h ≤ 11, -9 ≤ k ≤ 9, -44 ≤ l ≤ 45                        |
| Reflections collected                                            | 36169                                                         |
| Independent reflections                                          | 2747 [R <sub>int</sub> = 0.0862, R <sub>sigma</sub> = 0.0306] |
| Data/restraints/parameters                                       | 2747/0/155                                                    |
| Goodness-of-fit on F <sup>2</sup>                                | 1.047                                                         |
| Final R indexes [I ≥ 2σ (I)]                                     | R <sub>1</sub> = 0.0338, wR <sub>2</sub> = 0.0704             |
| Final R indexes [all data]                                       | R <sub>1</sub> = 0.0467, wR <sub>2</sub> = 0.0763             |
| Largest diff. peak/hole / e Å <sup>-3</sup>                      | 0.29/-0.47                                                    |

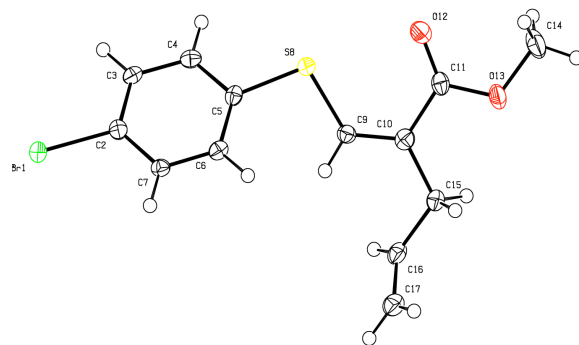

Fig.1. Asymmetric unit of **Z1\_6\_4**. Anisotropic displacement parameters were drawn at 50% probability. CCDC:1826391

#### IV. Mass Spectrometry Study

ESI-MS spectra were collected using a Thermo scientific Orbitrap Q Extractive Plus (Bremen, Germany) in the positive ion mode. Samples were infused at a flow rate of 10  $\mu\text{L}/\text{min}$  and ionized at a high voltage of +5 kV.

##### 4.1 ESI-MS analysis of **1c** and **2a**

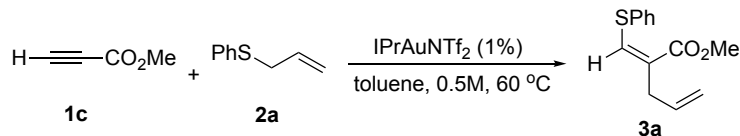

**General procedure:** 200  $\mu\text{M}$  IPrAuNTf<sub>2</sub> was added to 20 mM of **2a** and 30 mM **1c** in 3 mL of toluene, and the reaction mixture was stirred at 60  $^\circ\text{C}$  for 24 h. The reaction mixture was diluted in 1:20 ratio with acetonitrile, and tested on 5 min, 1 h, 2.5 h, 5 h and 24 h using ESI-MS.

##### Data analysis

Based on the cross-over experiment, a tentative mechanism for thioallylation is shown below:

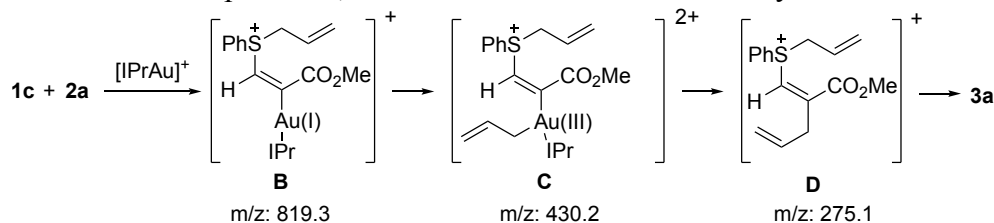

**Figure 4.1.1.** Proposed mechanism

As shown in **Figure 4.1.2**, An ion peak at  $m/z = 819.4$  showed up after 1 h, and its concentration became higher at 2.5 h then attenuated over time. At 2.5 h, another important ion peak at  $m/z = 859.3$  showed up, which became stronger at 5h.  $m/z = 275.1$  was also detected after 2.5 h. Another very intense peak throughout the experiment was  $m/z = 735.3$ . For clarity, data at 2.5 h was used to analyze the peaks at  $m/z = 819.4$ , 859.3, 275.1, 735.3. CID analysis were performed to determine the structure of these peaks. In principle, precursor ions after CID will provide fragment ions by losing neutrals from its own structure. Common fragmentation pathways include homolysis and heterolysis of a weak chemical bond. A detailed analysis of ion peaks with their CID spectrum (819.3, 859.4, 275.1, 735.3) is discussed here to determine their exact structures. Experimental data for all the ion peaks discussed here is within an error < 5ppm with the proposed molecular formulas.

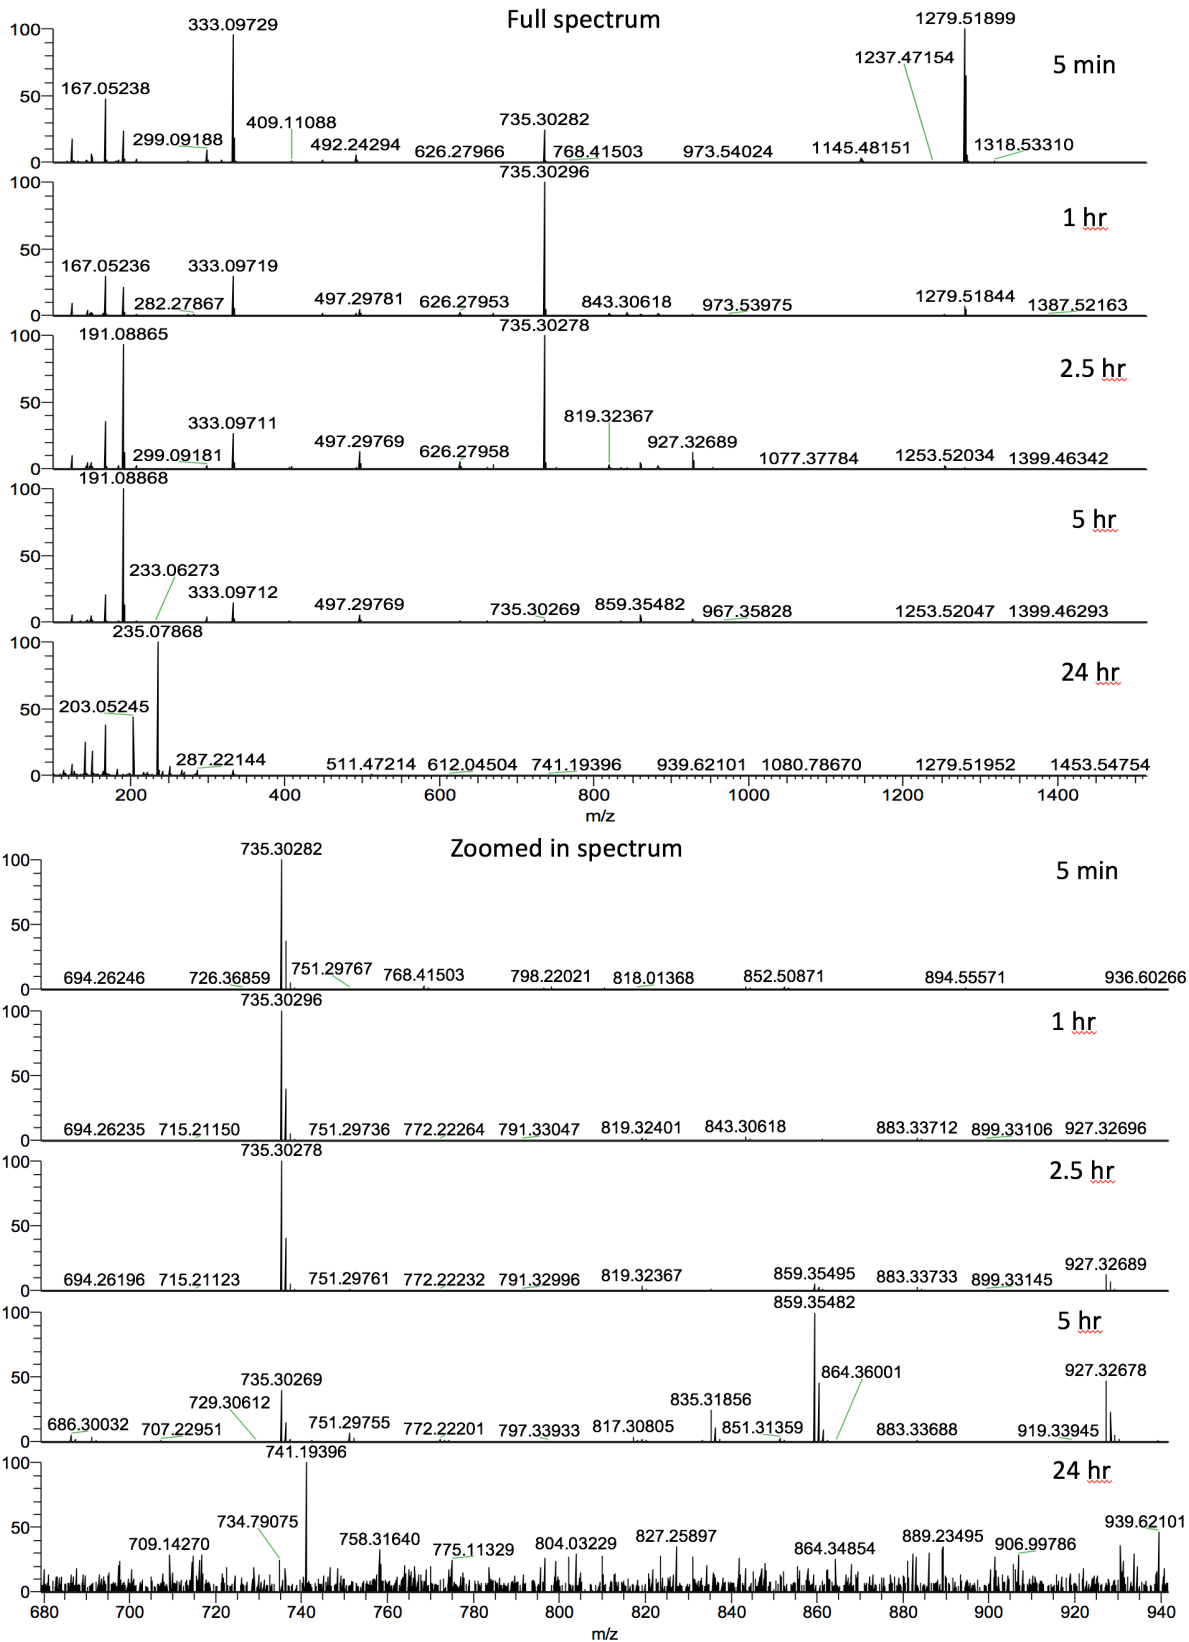

Figure 4.1.2. full and zoomed-in MS spectrum at different time intervals

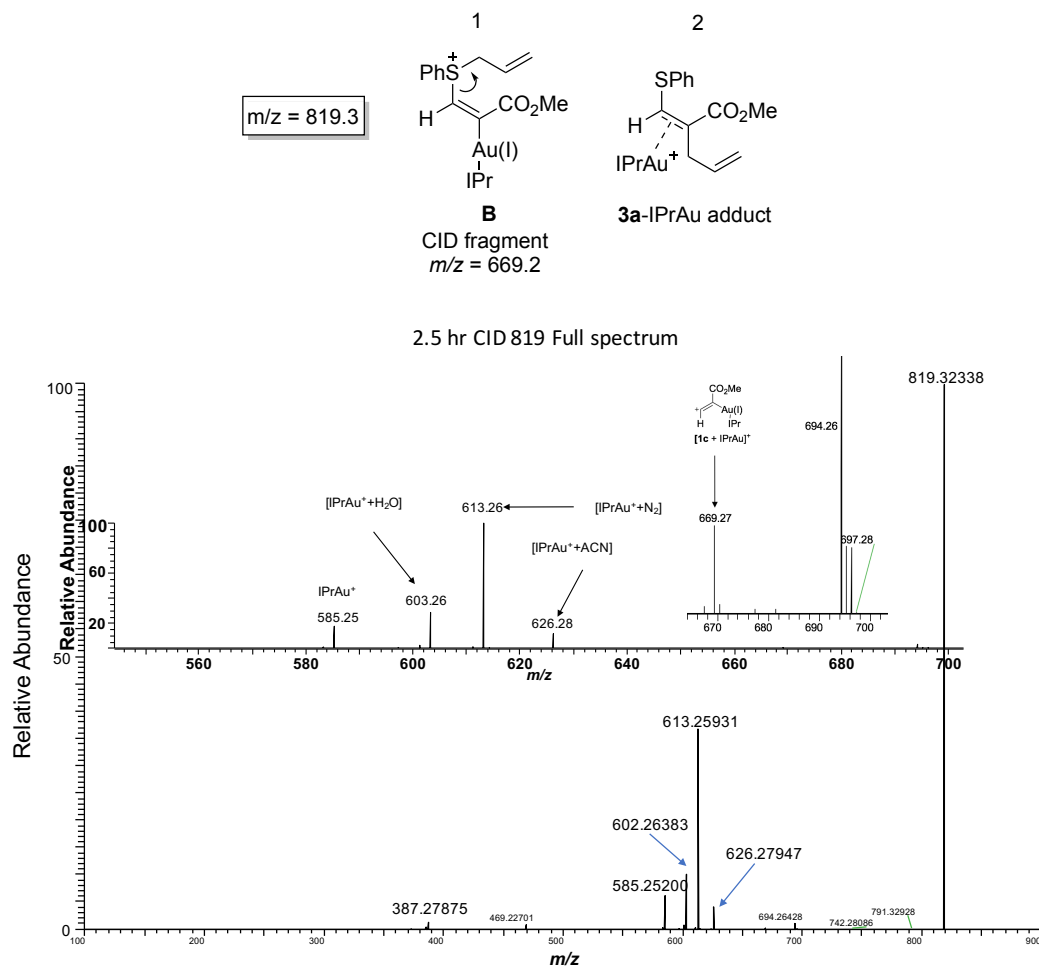

**Figure 4.1.3.** CID MS/MS spectrum for  $m/z = 819.3$  at 2.5 h

Two possible structures for  $m/z = 819.3$  are listed. Major IPrAu<sup>+</sup> fragment ions were detected upon CID as shown in **Figure 4.1.3**. The fact that the intensity of  $m/z = 819.3$  reached its maximum then attenuated suggests structure 1 is more likely, because if it's structure 2, the concentration should keep increasing as the reaction goes. In addition, the ion peak at  $m/z = 669.2$  represents [1c+IPrAu]<sup>+</sup>, which further proved structure 1 instead of structure 2 is the correct structure. **In conclusion, structure 1 which corresponds to intermediate B based on the proposed mechanism most likely accounts for  $m/z = 819.3$ .**

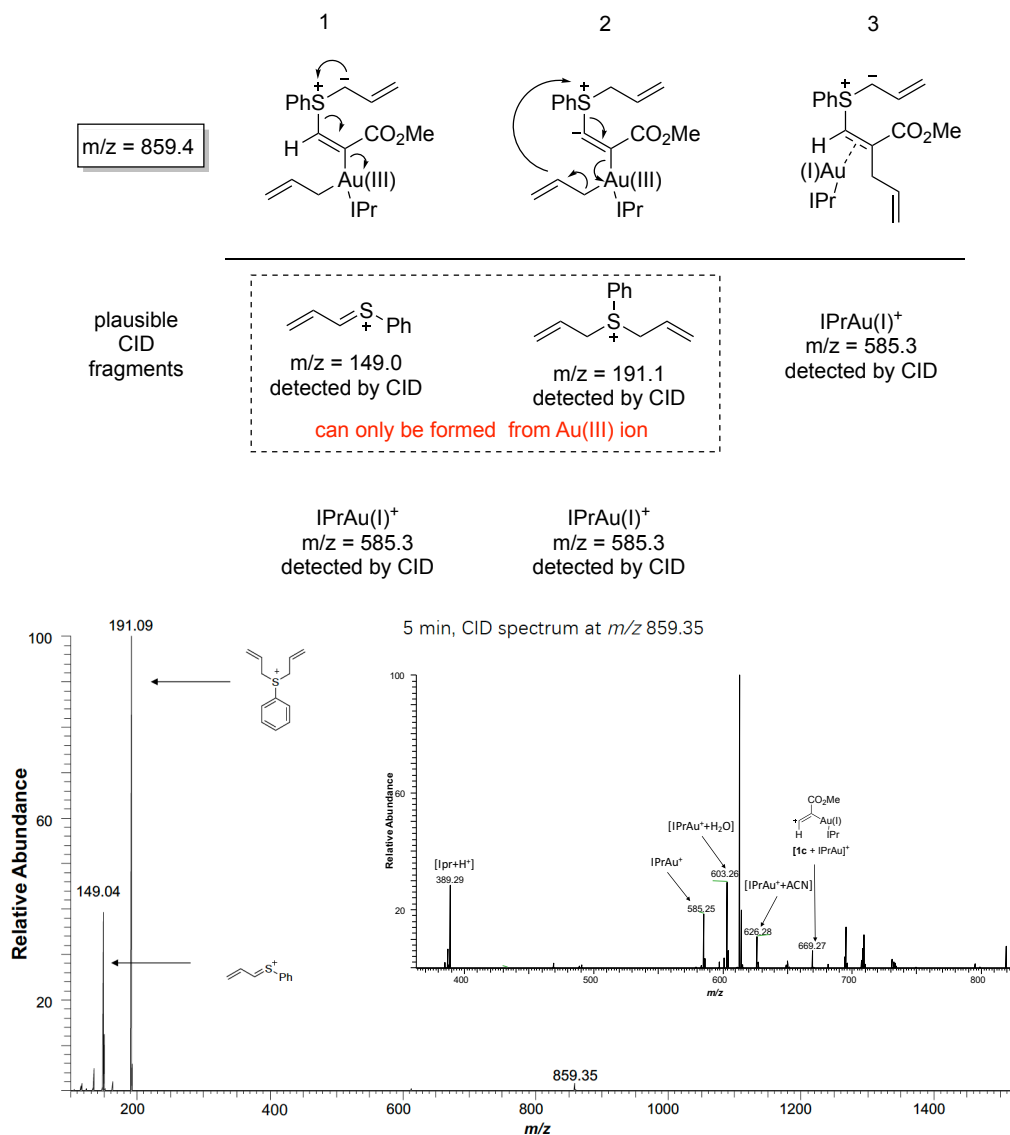

**Figure 4.1.4.** CID MS/MS spectrum for  $m/z = 859.4$  at 2.5 h

The ion peak at  $m/z = 859.4$ , corresponding to intermediate **C**  $[M-H]^+$  was clearly detected after 1 h. The corresponding CID data is shown in **Figure 4.1.4**. Besides  $\text{IPrAu}^+$  fragments, two very intensive ion peaks  $m/z = 149.0$  and  $191.1$  were detected. Three possible structures and their primary CID pathway are proposed. As the reviewer suggested, possible structures include Au(III) ions (1 and 2) and Au(I) ions 3. For Au(I) ion structure 3, after CID they would primarily give  $\text{IPrAu}^+$  ion and a neutral stable sulfonium ylide, thus is very unlikely to give the fragment ions  $m/z = 149.0$  and  $191.1$ . On the other hand, the Au(III) ions such as structure 1 can easily generate desired fragment  $m/z = 149.0$  by the loss of a neutral stable propiolate and allyl- $\text{IPrAu(I)}$  (further fragments to  $\text{IPrAu}^+$ ). Likewise, structure 2 will produce  $m/z = 191.1$  preferably by the loss of a neutral stable  $\text{IPrAu(I)}$ -acetylide upon CID. In addition, the CID file revealed  $m/z = 669.2$  corresponding to  $[\mathbf{1c} + \text{IPrAu}]^+$ , which further proved the precursor ion cannot be a simple Au(I)-product adduct. **In conclusion, the CID data strongly supported Au(III) ions such as structures 1 and 2 existed in the  $m/z = 859.4$  ion.**

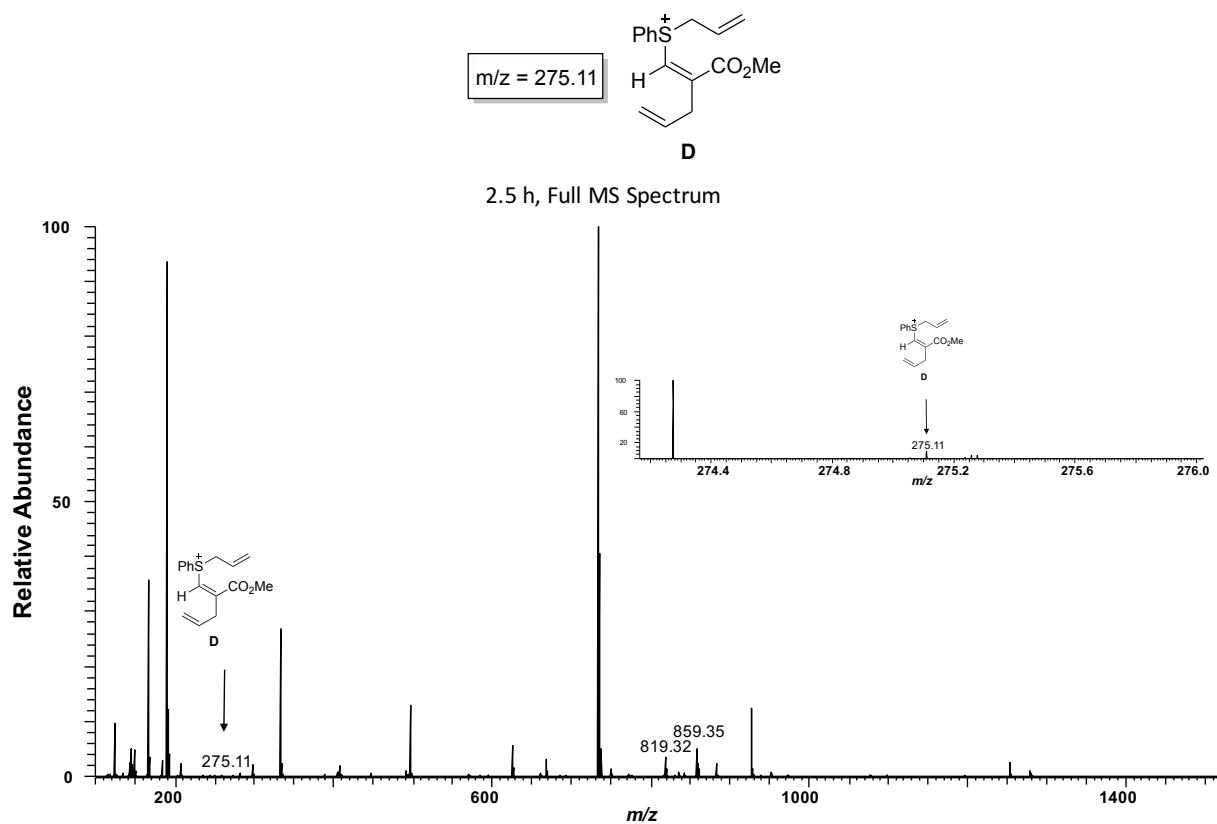

**Figure 4.1.5.** Intermediate **D** ( $m/z = 275.1$ ) observed at 2.5 h.

Intermediate **D** have also been detected at 2.5 h (**Figure 4.1.4**). Although CID of this ion was not performed due to its low intensity, it represents an important intermediate in the intermolecular allyl transfer pathway.



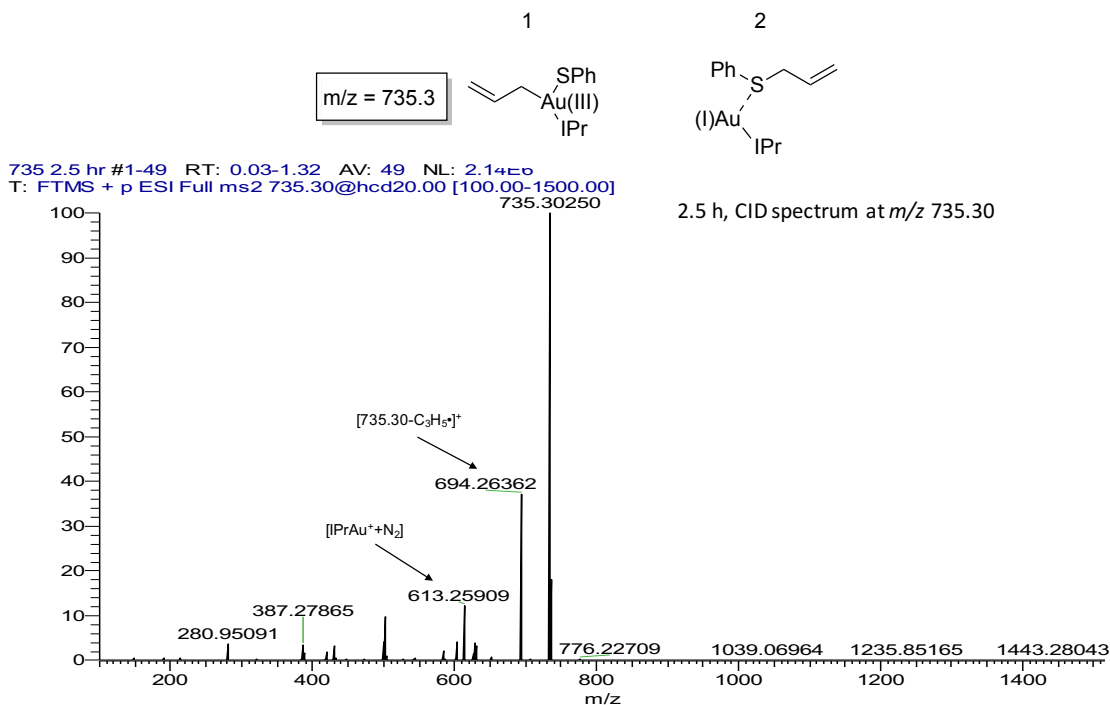

**Figure 4.1.6.** CID MS/MS data for  $m/z = 735.30$  at 2.5 h

Another important ion peak that draw our attention was  $m/z = 735.3$ . The intensity of this peak was very high throughout the reaction process. Two structures are proposed. The fact that CID file clearly showed a fragment ion of  $m/z = 694.3$  by the loss of an allyl radical ( $C_3H_5\cdot$ ) suggests that it is actually a Au(III) ion as shown in structure 1, because the Au(I) structure 2 is unlikely to break a C-S bond in the neutral allyl sulfide molecule. **In conclusion, structure 1 as a Au(III) ion was confirmed.**

### Conclusions for chapter 4.1

*Overall, we have successfully detected the ion peaks of several key intermediates to validate the reaction mechanism we proposed. The results are summarized in **Figure 4.1.7**. The existence of Au(III) ions are strongly supported by the CID MS/MS data of two ions ( $m/z = 735.3$  and  $859.3$ ). The fact that three key ions at  $m/z = 819.3$ ,  $859.4$  and  $275.1$  were detected largely supported a Au(I/III) pathway.*

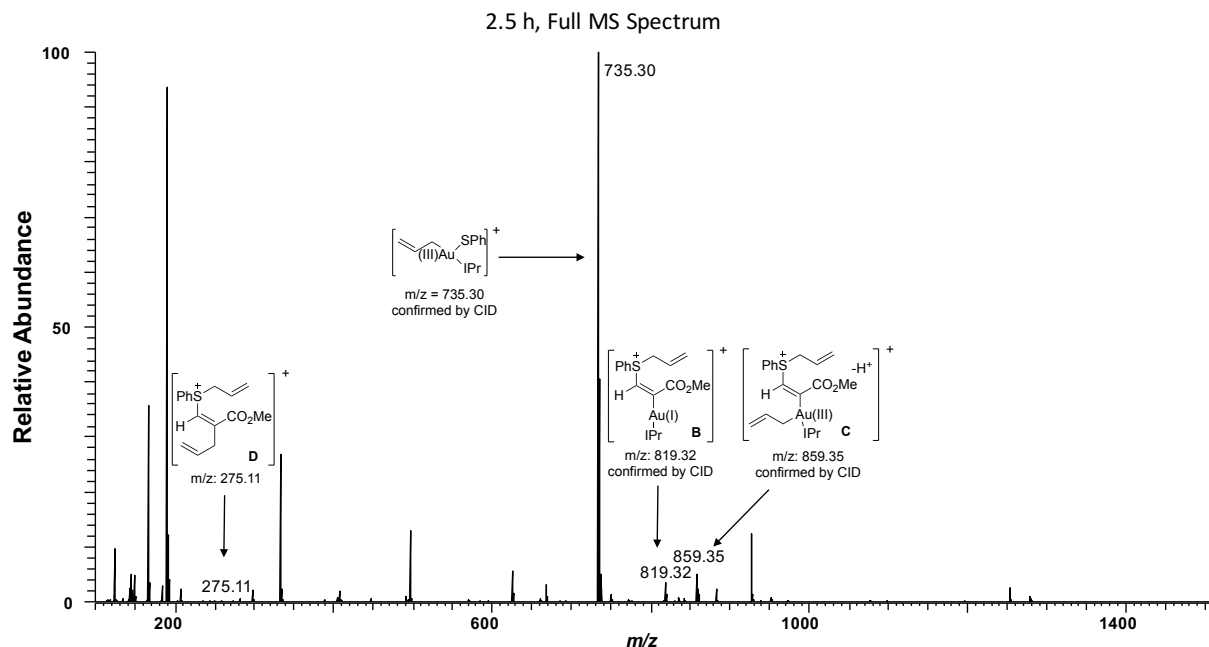

**Figure 4.1.7.** Summary for MS study 4.1

#### 4.2 ESI-MS analysis of **1c** and **2l**

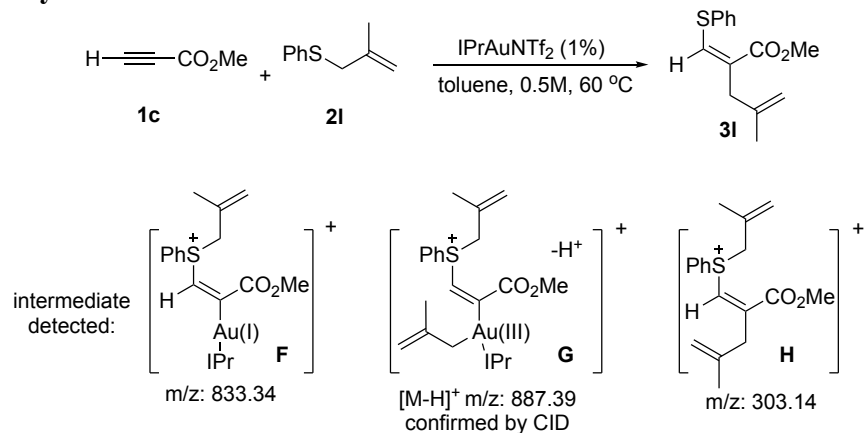

In order to further confirm the Au (I) and Au (III) intermediates observed in **Chapter 4.1**, **1c** was mixed with another sulfide **2l** in the presence of IPrAuNTf<sub>2</sub> catalyst (**Figure 4.2**). The vinyl-Au(I) intermediate **F** at  $m/z = 833.34$  was observed, and Au (III) intermediate **G** was observed at  $m/z = 887.4$ . Intermediate **H** without Au was also observed at  $m/z 303.14$ . The CID spectrum of Au (III) intermediate **G** displayed a very similar pattern with intermediate **C**, except for that in CID fragments of intermediate **G** the allyl group was replaced with the 2-methylallyl group ( $m/z = 219.1$  and  $163.1$ ).  $m/z = 669.2$  corresponding to  $[\mathbf{1c} + \text{IPrAu}]^+$  was detected again, which further

proved the precursor ion  $m/z = 887.4$  must be a Au(III) species instead of a simple Au(I)-product adduct.

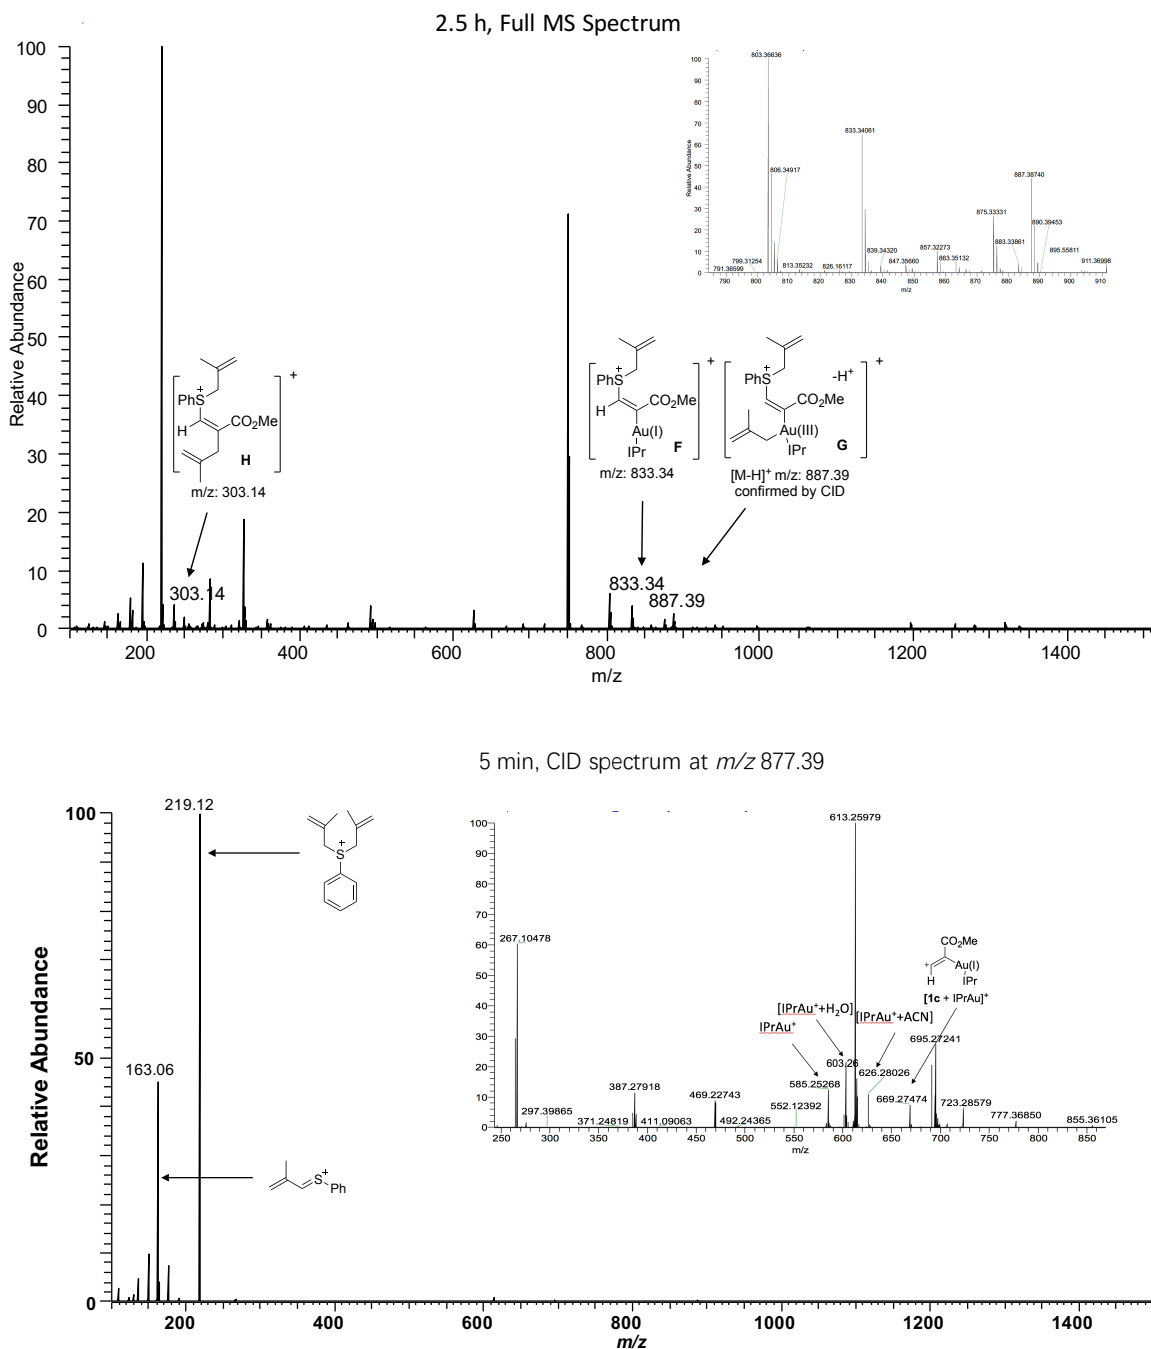

**Figure 4.2.** ESI-MS spectrum for **1c** and **2l** and CID analysis for  $m/z = 877.4$

### Conclusions for chapter 4.2

Overall, this experiment confirmed the reaction between **1c** and **2l** underwent the same reaction pathway as **1c** and **2a**; Au(III) intermediate at  $m/z = 887.4$  was confirmed.



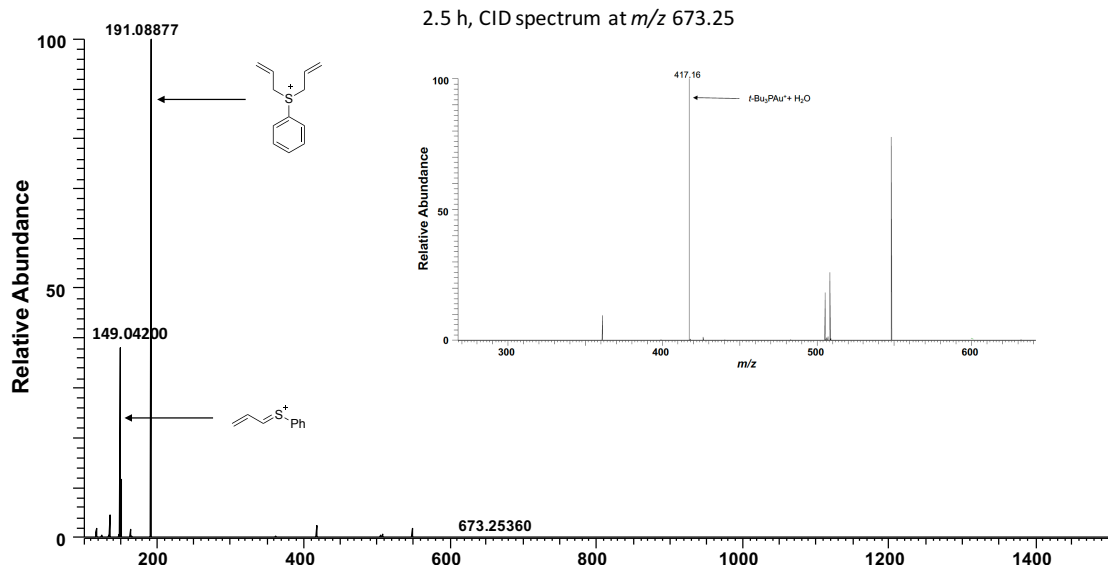

**Figure 4.3.** ESI-MS spectrum for **1c** and **2a** with *t*-Bu<sub>3</sub>PAuNTf<sub>2</sub> and CID analysis for *m/z* = 673.3

### Conclusions for chapter 4.3

Overall, thioallylation with a phosphine-based gold catalyst *t*-Bu<sub>3</sub>PAuNTf<sub>2</sub> underwent the same reaction pathway as IPrAuNTf<sub>2</sub>. Au(III) intermediate at *m/z* = 673.3 was confirmed.

### Conclusions for Mass study

In conclusion, we have successfully identified two Au(III) intermediates by their *m/z* (859.4 and 735.3) and confirmed their structures by CID MS/MS spectrum. Several other key intermediates in our proposed mechanism were also detected, which provided sufficient proof for the reaction pathway which involves a vinyl gold formation and subsequent allyl transfer in intermolecular fashion via Au(I/III) cycle.

## V. NMR Study

### 5.1 NMR study for compound 5a

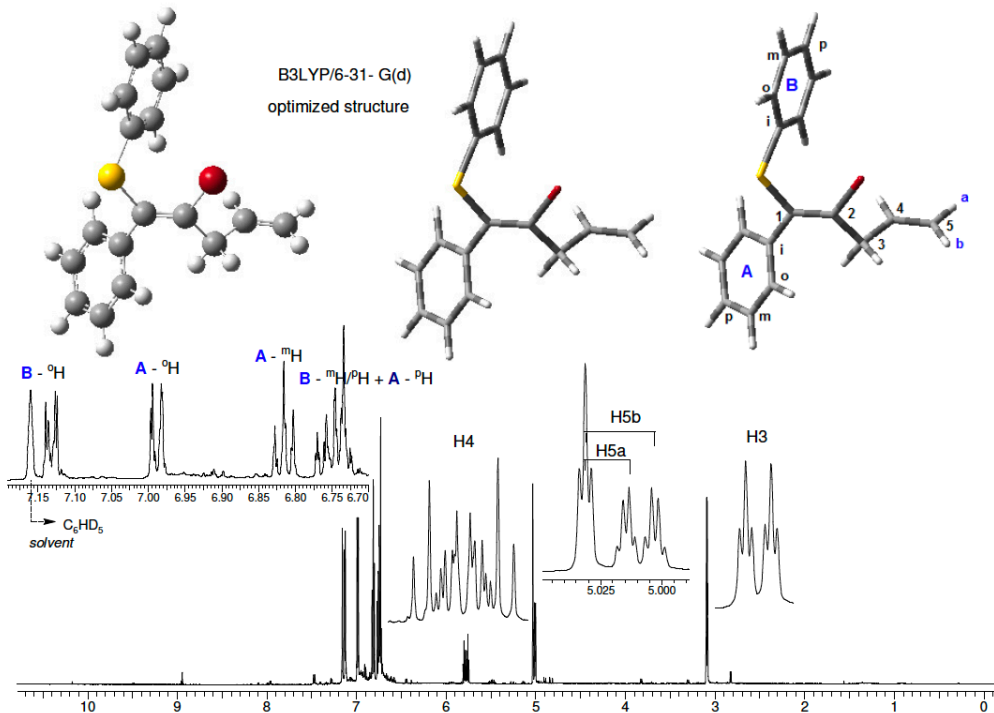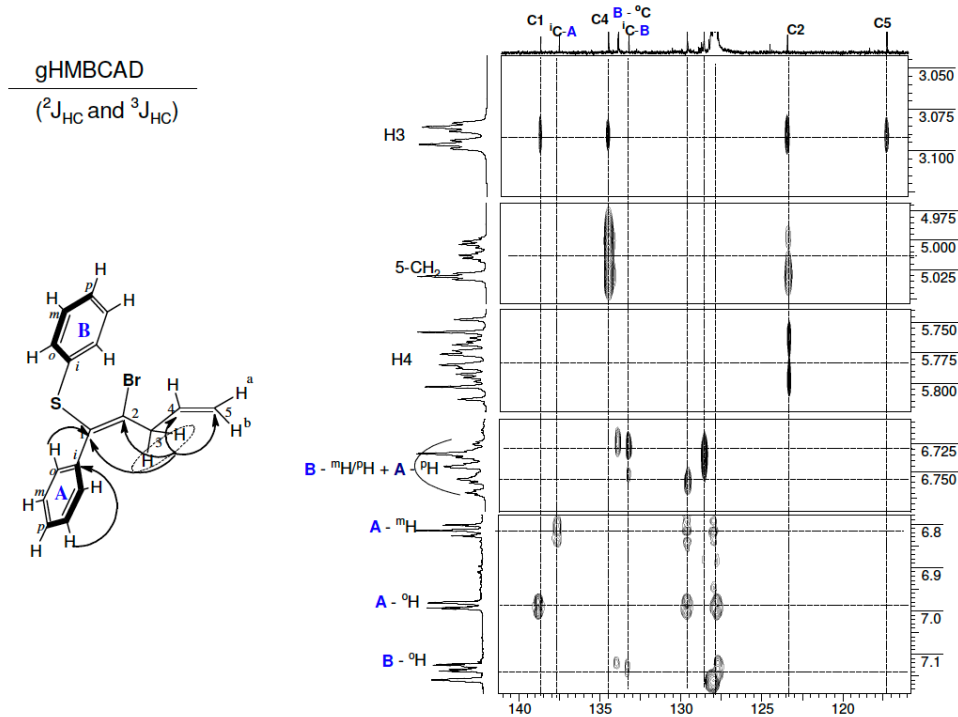

**DPFGSENOE** subspectrum

Selective excitation of H3

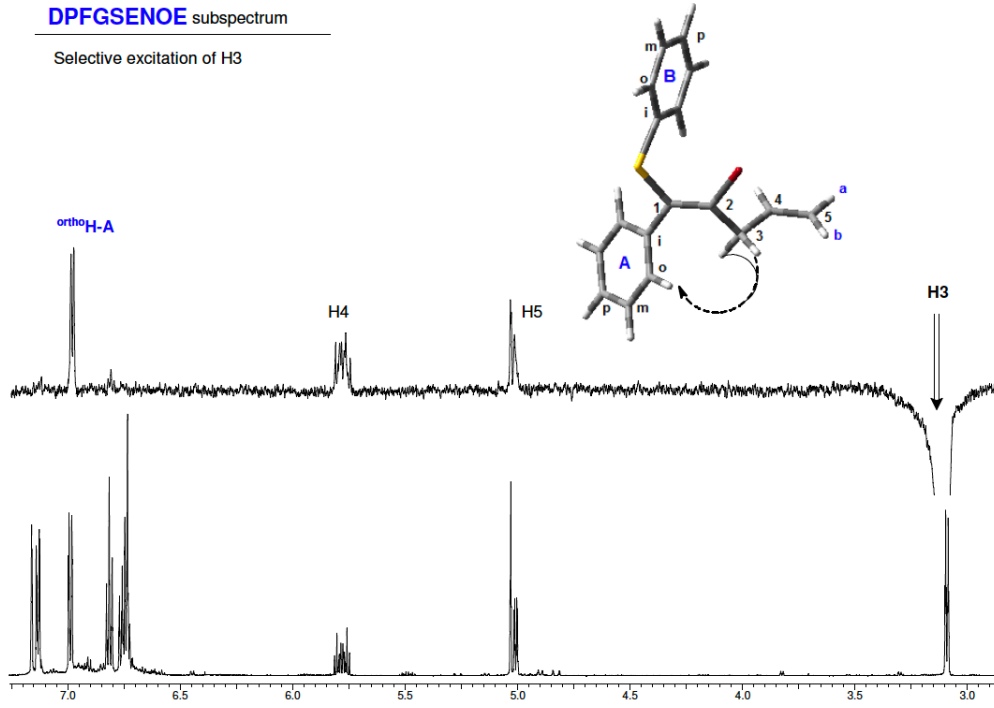

**DPFGSENOE** subspectrum

Selective excitation of orthoH-A

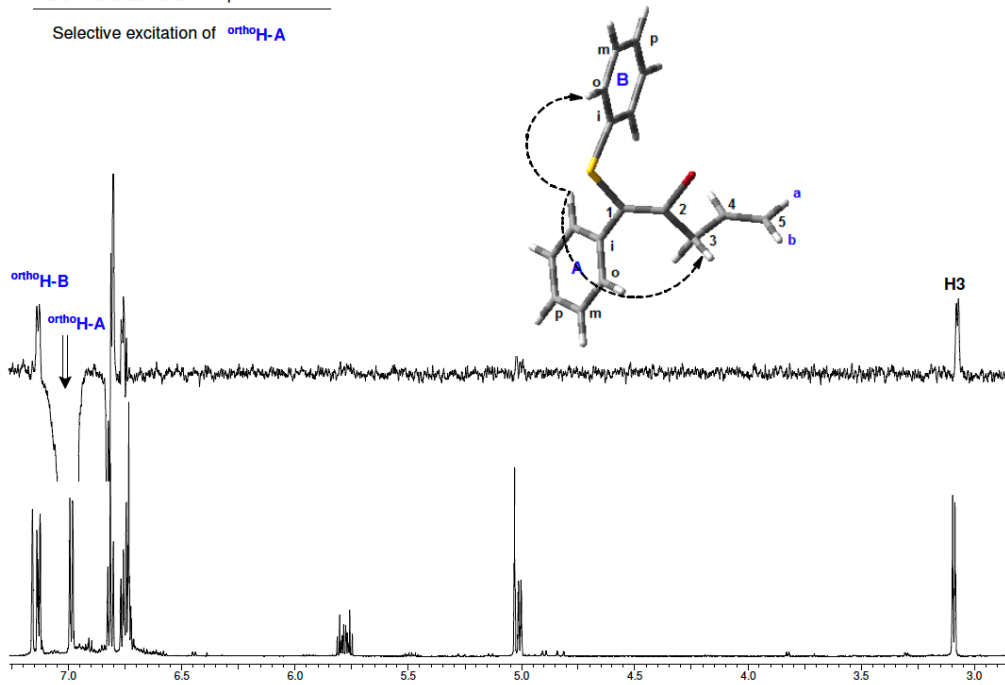

## 5.2 NMR study for compound 5c

DPFGSENOE subspectrum

Selective excitation of H3

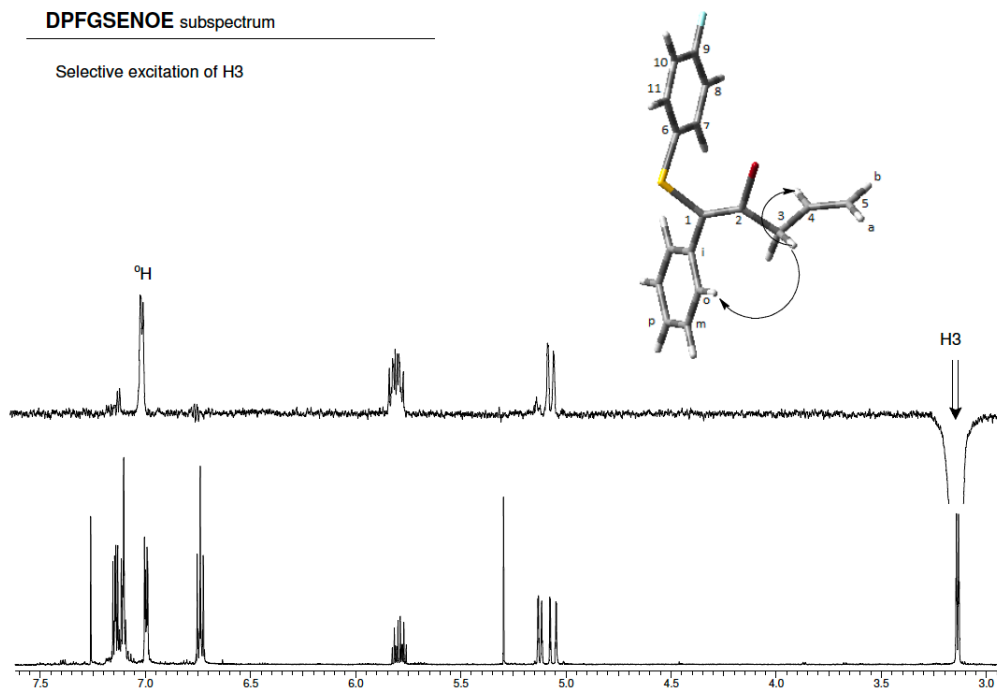

DPFGSENOE subspectrum

Selective excitation of <sup>o</sup>H

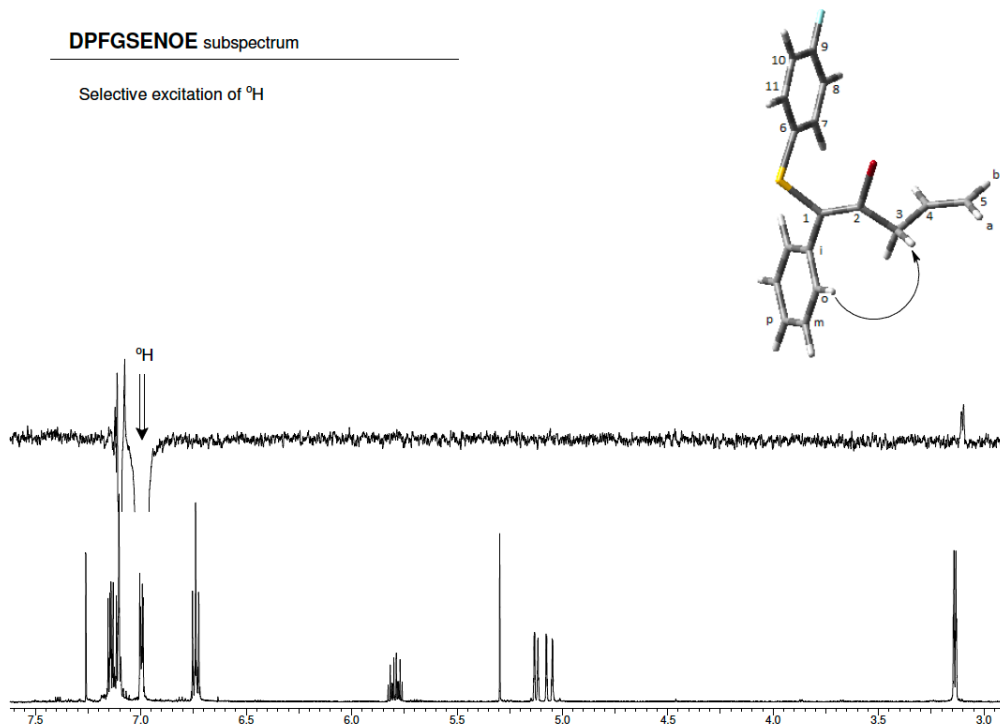



### 5.3 NMR study for compound 5p

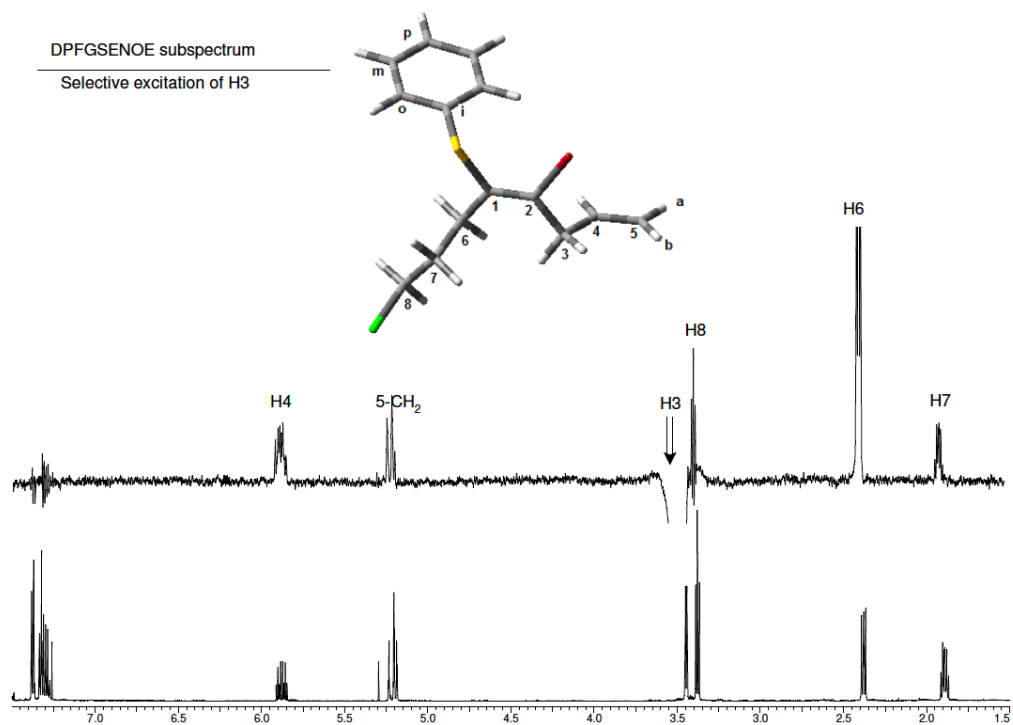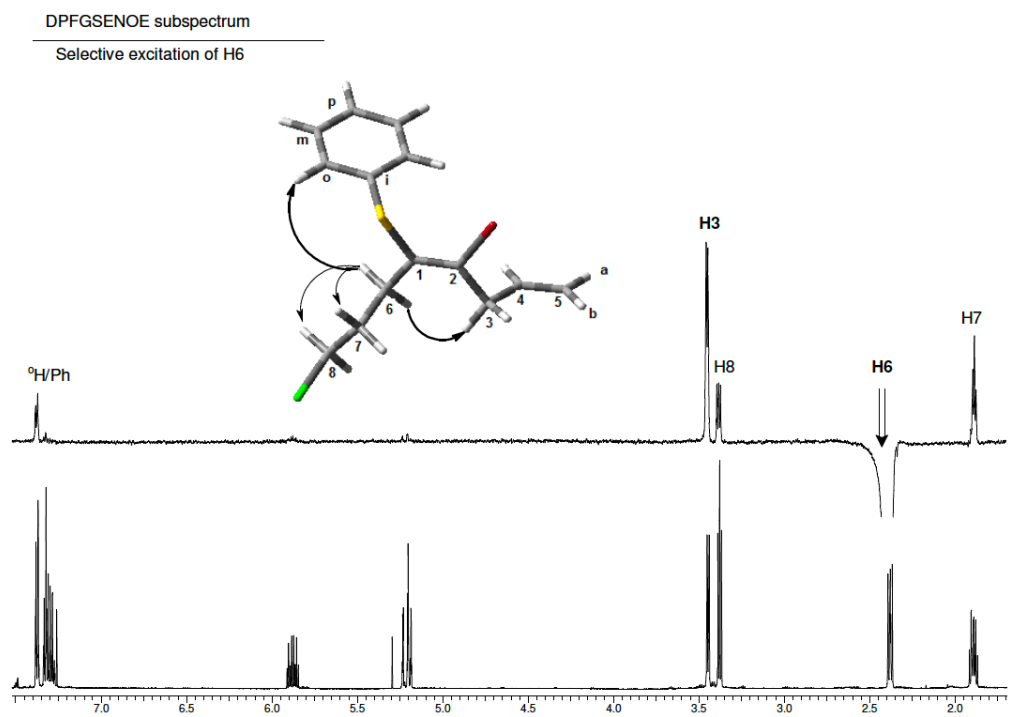

DPFGSENOE subspectrum

Selective excitation of <sup>ortho</sup>H/Ph

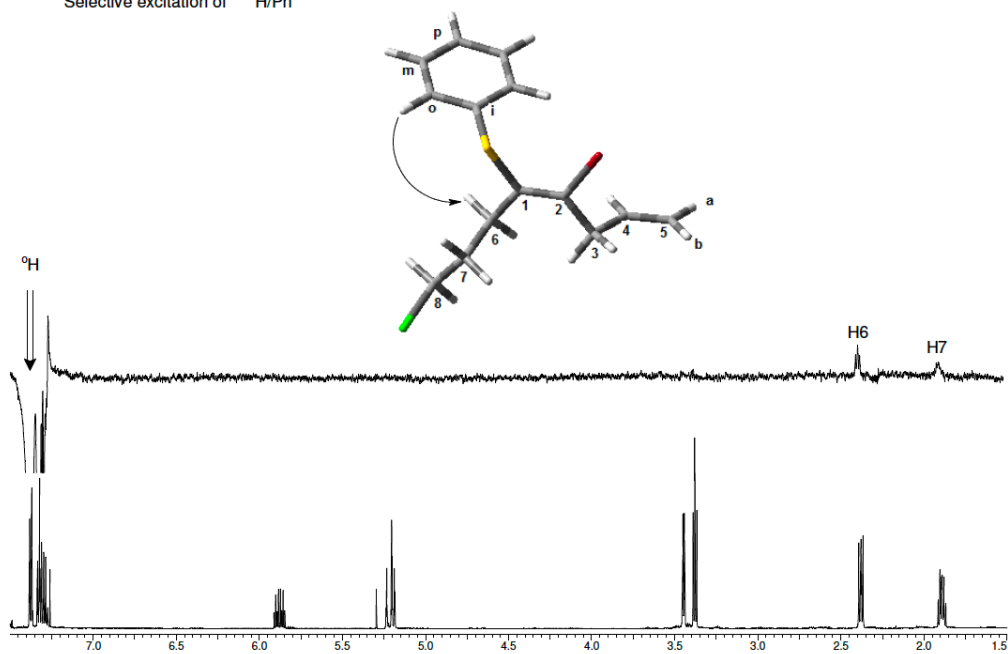

gHMBCAD

<sup>2</sup>J<sub>HC</sub> and <sup>3</sup>J<sub>HC</sub>

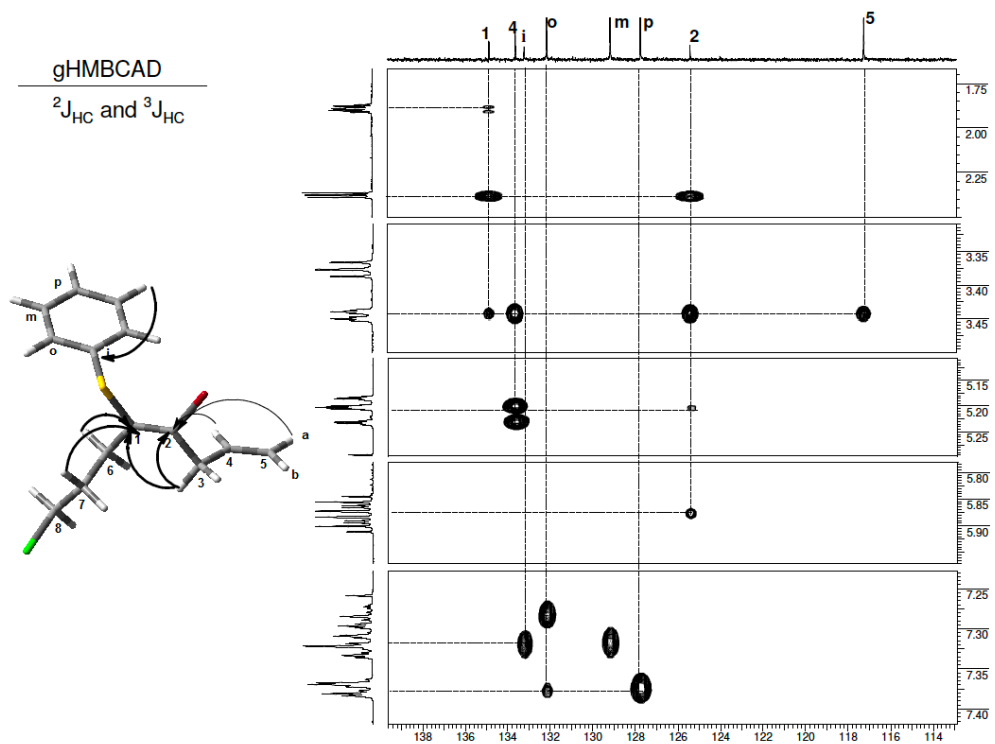

## VI. Compound Characterization

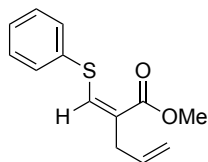

**3a**

methyl (Z)-2-((phenylthio)methylene)pent-4-enoate (**3a**)

This compound was prepared following general procedure **2.3**, and crude mixture was purified using flash chromatography (20:1 hexane/EtOAc) to yield the desired product as colorless oil (95%).

**<sup>1</sup>H NMR** (400 MHz; CDCl<sub>3</sub>): δ 7.46-7.43 (m, 2H), 7.35-7.26 (m, 3H), 6.99 (t, *J* = 1.0 Hz, 1H), 5.81 (ddt, *J* = 16.9, 10.2, 6.6 Hz, 1H), 5.07-5.00 (m, 2H), 3.78 (s, 3H), 3.06 (dq, *J* = 6.5, 1.3 Hz, 2H).

**<sup>13</sup>C NMR** (100 MHz; CDCl<sub>3</sub>): δ 167.0, 145.0, 136.9, 135.5, 130.9, 129.3, 127.9, 123.5, 116.6, 51.6, 36.7.

HRMS: *m/z* (ESI) calculated for C<sub>13</sub>H<sub>14</sub>O<sub>2</sub>S (M+Na)<sup>+</sup>: 257.0607, found 257.0610.

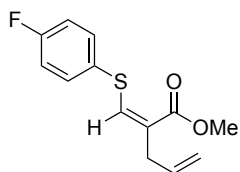

**3b**

methyl (Z)-2-(((4-fluorophenyl)thio)methylene)pent-4-enoate (**3b**)

This compound was prepared following general procedure **2.3**, and crude mixture was purified using flash chromatography (20:1 hexane/EtOAc) to yield the desired product as colorless oil (90%).

**<sup>1</sup>H NMR** (400 MHz; CDCl<sub>3</sub>): δ 7.49-7.45 (m, 2H), 7.09-7.05 (m, 2H), 6.91 (t, *J* = 1.1 Hz, 1H), 5.83 (ddt, *J* = 16.9, 10.2, 6.6 Hz, 1H), 5.09-5.04 (m, 2H), 3.83 (s, 3H), 3.08 (dq, *J* = 6.5, 1.3 Hz, 2H).

**<sup>13</sup>C NMR** (100 MHz; CDCl<sub>3</sub>): δ 167.0, 162.7 (d, *J* = 247.3), 145.3, 135.4, 133.4 (d, *J* = 8.7 Hz), 132.1 (d, *J* = 4.3 Hz), 123.5, 116.6, 116.4 (d, *J* = 21.8 Hz), 51.7, 36.6.

**<sup>19</sup>F NMR** (376 MHz; CDCl<sub>3</sub>): δ -113.1 (tt, *J* = 8.5, 5.3 Hz, 1F)

HRMS: *m/z* (ESI) calculated for C<sub>13</sub>H<sub>13</sub>FO<sub>2</sub>S (M+Na)<sup>+</sup>: 275.0512, found 275.0509.

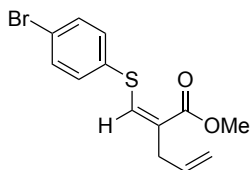

**3c**

methyl (Z)-2-(((4-bromophenyl)thio)methylene)pent-4-enoate (**3c**)

This compound was prepared following general procedure **2.3**, and crude mixture was purified using flash chromatography (20:1 hexane/EtOAc) to yield the desired product as white solid (89%).

**<sup>1</sup>H NMR** (400 MHz; CDCl<sub>3</sub>): δ 7.50-7.46 (m, 2H), 7.35-7.31 (m, 2H), 6.92 (t, *J* = 1.1 Hz, 1H), 5.87-5.77 (m, 1H), 5.10-5.04 (m, 2H), 3.81 (s, 3H), 3.08 (dq, *J* = 6.5, 1.3 Hz, 2H).

**<sup>13</sup>C NMR** (100 MHz; CDCl<sub>3</sub>): δ 166.9, 143.9, 136.0, 135.2, 132.4, 132.3, 124.1, 122.2, 116.8, 51.7, 36.7.

HRMS: *m/z* (ESI) calculated for C<sub>13</sub>H<sub>13</sub>BrO<sub>2</sub>S (M+H)<sup>+</sup>: 314.9872, found 314.9864.

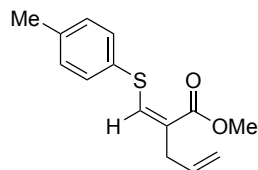

**3d**

methyl (*Z*)-2-((*p*-tolylthio)methylene)pent-4-enoate (**3d**)

This compound was prepared following general procedure **2.3**, and crude mixture was purified using flash chromatography (20:1 hexane/EtOAc) to yield the desired product as colorless oil (92%).

**<sup>1</sup>H NMR** (400 MHz; CDCl<sub>3</sub>): δ 7.38-7.35 (m, 2H), 7.16 (d, *J* = 7.9 Hz, 2H), 6.97 (t, *J* = 1.0 Hz, 1H), 5.82 (ddt, *J* = 16.9, 10.2, 6.6 Hz, 1H), 5.08-5.01 (m, 2H), 3.81 (s, 3H), 3.07 (dq, *J* = 6.5, 1.3 Hz, 2H), 2.35 (s, 3H).

**<sup>13</sup>C NMR** (100 MHz; CDCl<sub>3</sub>): δ 167.1, 146.0, 138.1, 135.6, 133.4, 131.2, 130.0, 123.0, 116.5, 51.6, 36.7, 21.1.

HRMS: *m/z* (ESI) calculated for C<sub>14</sub>H<sub>16</sub>O<sub>2</sub>S (M+Na)<sup>+</sup>: 271.0763, found 271.0768.

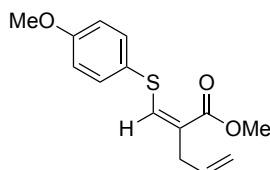

**3e**

methyl (*Z*)-2-(((4-methoxyphenyl)thio)methylene)pent-4-enoate (**3e**)

This compound was prepared following general procedure **2.3**, and crude mixture was purified using flash chromatography (10:1 hexane/EtOAc) to yield the desired product as colorless oil (86%). *Cation: this product is prone to E/Z isomerization over time with Au catalyst or on column. Fast purification is required.*

**<sup>1</sup>H NMR** (400 MHz; CDCl<sub>3</sub>): δ 7.44-7.40 (m, 2H), 6.91-6.88 (m, 3H), 5.82 (ddt, *J* = 16.9, 10.2, 6.6 Hz, 1H), 5.08-5.01 (m, 2H), 3.82 (s, 3H), 3.81 (s, 3H), 3.05 (dq, *J* = 6.5, 1.3 Hz, 2H).

**<sup>13</sup>C NMR** (100 MHz; CDCl<sub>3</sub>): δ 167.1, 159.8, 147.0, 135.6, 133.4, 127.6, 122.6, 116.4, 114.8, 77.3, 77.0, 76.7, 55.4, 51.6, 36.7

HRMS: *m/z* (ESI) calculated for C<sub>14</sub>H<sub>16</sub>O<sub>3</sub>S (M+Na)<sup>+</sup>: 287.0719, found 287.0706.

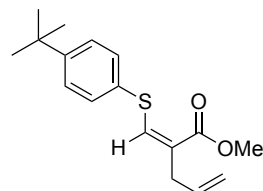

**3f**

methyl (Z)-2-(((4-(*tert*-butyl)phenyl)thio)methylene)pent-4-enoate (**3f**)

This compound was prepared following general procedure **2.3**, and crude mixture was purified using flash chromatography (20:1 hexane/EtOAc) to yield the desired product as colorless oil (94%).

**<sup>1</sup>H NMR** (400 MHz; CDCl<sub>3</sub>): δ 7.42-7.37 (m, 4H), 7.02 (t, *J* = 1.1 Hz, 1H), 5.83 (dd, *J* = 17.1, 10.1 Hz, 1H), 5.08-5.02 (m, 2H), 3.81 (s, 3H), 3.07 (dq, *J* = 6.5, 1.3 Hz, 2H), 1.32 (s, 9H).

**<sup>13</sup>C NMR** (100 MHz; CDCl<sub>3</sub>): δ 167.1, 151.3, 145.9, 135.6, 133.4, 130.9, 126.3, 123.0, 116.4, 51.6, 36.8, 34.6, 31.2.

HRMS: *m/z* (ESI) calculated for C<sub>17</sub>H<sub>22</sub>O<sub>2</sub>S (M+H)<sup>+</sup>: 291.1414, found 291.1212.

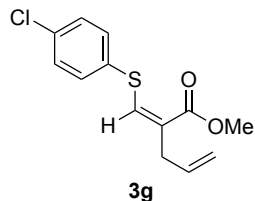

methyl (Z)-2-(((4-chlorophenyl)thio)methylene)pent-4-enoate (**3g**)

This compound was prepared following general procedure **2.3**, and crude mixture was purified using flash chromatography (20:1 hexane/EtOAc) to yield the desired product as colorless oil (92%).

**<sup>1</sup>H NMR** (400 MHz; CDCl<sub>3</sub>): δ 7.42-7.38 (m, 2H), 7.34-7.31 (m, 2H), 6.92 (t, *J* = 1.1 Hz, 1H), 5.82 (ddt, *J* = 16.9, 10.3, 6.5 Hz, 1H), 5.10-5.04 (m, 2H), 3.82 (s, 3H), 3.08 (dq, *J* = 6.5, 1.3 Hz, 2H).

**<sup>13</sup>C NMR** (100 MHz; CDCl<sub>3</sub>): δ 166.9, 144.1, 135.4, 135.3, 134.2, 132.2, 129.4, 124.0, 116.7, 51.7, 36.7.

HRMS: *m/z* (ESI) calculated for C<sub>13</sub>H<sub>13</sub>ClO<sub>2</sub>S (M+Na)<sup>+</sup>: 291.0217, found 291.0221.

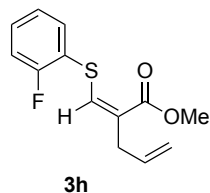

methyl (Z)-2-(((2-fluorophenyl)thio)methylene)pent-4-enoate (**3h**)

This compound was prepared following general procedure **2.3**, and crude mixture was purified using flash chromatography (20:1 hexane/EtOAc) to yield the desired product as colorless oil (90%).

**<sup>1</sup>H NMR** (400 MHz; CDCl<sub>3</sub>): δ 7.50 (ddd, *J* = 7.6, 7.6, 1.7 Hz, 1H), 7.35 (dddd, *J* = 8.1, 7.5, 5.1, 1.8 Hz, 1H), 7.18-7.11 (m, 2H), 6.88 (q, *J* = 1.1 Hz, 1H), 5.82 (ddt, *J* = 16.9, 10.2, 6.6 Hz, 1H), 5.10-5.03 (m, 2H), 3.83 (s, 3H), 3.08 (dt, *J* = 6.5, 1.3 Hz, 2H).

**<sup>13</sup>C NMR** (100 MHz; CDCl<sub>3</sub>): δ 167.0, 161.4 (d, *J* = 246.2 Hz), 143.9, 135.3, 133.9, 130.5 (d, *J* = 7.8 Hz), 124.7 (d, *J* = 3.9 Hz), 124.1, 123.5 (d, *J* = 17.6 Hz), 116.6, 116.3 (d, *J* = 22.4 Hz), 51.7, 36.6.

**<sup>19</sup>F NMR** (376 MHz; CDCl<sub>3</sub>): δ -108.7 (m, 1F)

HRMS: *m/z* (ESI) calculated for C<sub>13</sub>H<sub>13</sub>FO<sub>2</sub>S (M+Na)<sup>+</sup>: 275.0512, found 275.0507.

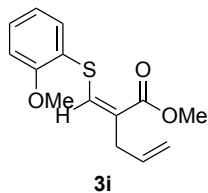

methyl (*Z*)-2-(((2-methoxyphenyl)thio)methylene)pent-4-enoate (**3i**)

This compound was prepared following general procedure **2.3**, and crude mixture was purified using flash chromatography (20:1 hexane/EtOAc) to yield the desired product as colorless oil (90%).

**<sup>1</sup>H NMR** (400 MHz; CDCl<sub>3</sub>): δ 7.45 (dd, *J* = 7.6, 1.7 Hz, 1H), 7.32 (ddd, *J* = 7.8, 7.8, 1.6 Hz, 1H), 6.98-6.91 (m, 3H), 5.82 (ddt, *J* = 16.9, 10.2, 6.6 Hz, 1H), 5.08-5.01 (m, 2H), 3.87 (s, 3H), 3.81 (s, 3H), 3.06 (qd, *J* = 6.5, 1.2 Hz, 2H).

**<sup>13</sup>C NMR** (100 MHz; CDCl<sub>3</sub>): δ 167.1, 158.2, 145.5, 135.7, 133.2, 129.9, 124.2, 123.0, 121.1, 116.3, 111.3, 55.8, 51.5, 36.7.

HRMS: *m/z* (ESI) calculated for C<sub>14</sub>H<sub>16</sub>O<sub>3</sub>S (M+Na)<sup>+</sup>: 287.0719, found 287.0707.

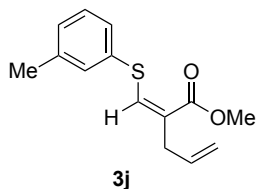

methyl (*Z*)-2-((*m*-tolylthio)methylene)pent-4-enoate (**3j**)

This compound was prepared following general procedure **2.3**, and crude mixture was purified using flash chromatography (20:1 hexane/EtOAc) to yield the desired product as colorless oil (95%).

**<sup>1</sup>H NMR** (400 MHz; CDCl<sub>3</sub>): δ 7.29-7.24 (m, 3H), 7.13-7.11 (m, 1H), 7.02 (t, *J* = 0.9 Hz, 1H), 5.83 (ddt, *J* = 16.9, 10.3, 6.6 Hz, 1H), 5.09-5.02 (m, 2H), 3.81 (s, 3H), 3.08 (dq, *J* = 6.5, 1.2 Hz, 2H), 2.35 (s, 3H).

**<sup>13</sup>C NMR** (100 MHz; CDCl<sub>3</sub>): δ 167.0, 145.3, 139.1, 136.6, 135.6, 131.6, 129.1, 128.8, 128.0, 123.2, 116.5, 51.6, 36.8, 21.3.

HRMS: *m/z* (ESI) calculated for C<sub>14</sub>H<sub>16</sub>O<sub>2</sub>S (M+Na)<sup>+</sup>: 271.0763, found 271.0777.

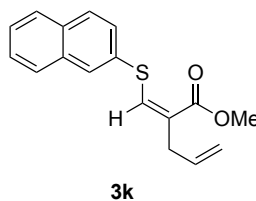

methyl (*Z*)-2-((naphthalen-2-ylthio)methylene)pent-4-enoate (**3k**)

This compound was prepared following general procedure **2.3**, and crude mixture was purified using flash chromatography (20:1 hexane/EtOAc) to yield the desired product as colorless oil (70%).

**<sup>1</sup>H NMR** (400 MHz; CDCl<sub>3</sub>): δ 7.96-7.96 (m, 1H), 7.84-7.79 (m, 3H), 7.55-7.49 (m, 3H), 7.11 (t, *J* = 1.1 Hz, 1H), 5.85 (ddt, *J* = 16.9, 10.2, 6.6 Hz, 1H), 5.11-5.03 (m, 2H), 3.84 (s, 3H), 3.11 (dq, *J* = 6.5, 1.3 Hz, 2H).

**<sup>13</sup>C NMR** (100 MHz; CDCl<sub>3</sub>): δ 167.1, 144.9, 135.5, 134.0, 133.5, 132.6, 130.0, 129.1, 128.3, 127.7, 127.6, 126.8, 126.6, 123.7, 116.6, 51.7, 36.8.

HRMS: *m/z* (ESI) calculated for C<sub>17</sub>H<sub>16</sub>O<sub>2</sub>S (M+Na)<sup>+</sup>: 307.0763, found 307.0758.

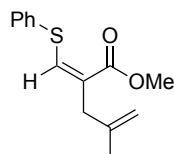

**3l**

methyl (*Z*)-4-methyl-2-((phenylthio)methylene)pent-4-enoate (**3l**)

This compound was prepared following general procedure **2.3**, and crude mixture was purified using flash chromatography (20:1 hexane/EtOAc) to yield the desired product as colorless oil (88%).

**<sup>1</sup>H NMR** (400 MHz; CDCl<sub>3</sub>): δ 7.47 (dq, *J* = 6.3, 2.0 Hz, 2H), 7.38-7.29 (m, 3H), 7.01 (t, *J* = 0.9 Hz, 1H), 4.81-4.71 (m, 2H), 3.80 (s, 3H), 3.03 (s, 2H), 1.72 (s, 3H).

**<sup>13</sup>C NMR** (100 MHz; CDCl<sub>3</sub>): δ 167.3, 145.3, 143.4, 136.9, 130.9, 129.3, 127.9, 123.1, 112.1, 51.6, 40.4, 22.3.

HRMS: *m/z* (ESI) calculated for C<sub>14</sub>H<sub>16</sub>O<sub>2</sub>S (M+H)<sup>+</sup>: 249.0944, found 249.0944.

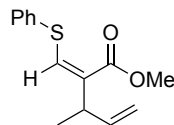

**3m**

methyl (*Z*)-3-methyl-2-((phenylthio)methylene)pent-4-enoate (**3m**)

This compound was prepared following general procedure **2.3**, and crude mixture was purified using flash chromatography (20:1 hexane/EtOAc) to yield the desired product as colorless oil (91%).

**<sup>1</sup>H NMR** (400 MHz; CDCl<sub>3</sub>): δ 7.46 (dq, *J* = 6.3, 1.9 Hz, 2H), 7.38-7.29 (m, 3H), 7.00 (d, *J* = 0.6 Hz, 1H), 5.87 (ddd, *J* = 17.2, 10.4, 6.0 Hz, 1H), 5.08-5.01 (m, 2H), 3.82 (s, 3H), 3.52-3.45 (m, 1H), 1.21 (d, *J* = 6.9 Hz, 3H).

**<sup>13</sup>C NMR** (100 MHz; CDCl<sub>3</sub>): δ 167.0, 143.7, 141.2, 137.1, 130.7, 129.3, 129.1, 127.8, 114.0, 51.6, 38.9, 19.1.

HRMS: *m/z* (ESI) calculated for C<sub>14</sub>H<sub>16</sub>O<sub>2</sub>S (M+Na)<sup>+</sup>: 271.0763, found 271.0772.

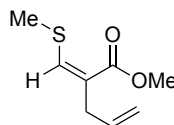

**3n**

methyl (*Z*)-2-((methylthio)methylene)pent-4-enoate (**3n**)

This compound was prepared following general procedure **2.3**, and crude mixture was purified using flash chromatography (20:1 hexane/EtOAc) to yield the desired product as colorless oil (86%). *Cation: this product is volatile. Careful rot-vap and vacuum is required.*

**<sup>1</sup>H NMR** (400 MHz; CDCl<sub>3</sub>): δ 6.77 (t, *J* = 1.0 Hz, 1H), 5.88-5.78 (m, 1H), 5.09-5.04 (m, 2H), 3.77 (s, 3H), 3.06-3.03 (dq, *J* = 6.4, 1.2 Hz, 2H), 2.36 (s, 3H).

$^{13}\text{C NMR}$  (100 MHz;  $\text{CDCl}_3$ ):  $\delta$  167.1, 147.3, 135.8, 122.9, 116.3, 51.4, 36.8, 19.3.  
HRMS:  $m/z$  (ESI) calculated for  $\text{C}_8\text{H}_{12}\text{O}_2\text{S}$  ( $\text{M}+\text{Na}$ ) $^+$ : 195.0450, found 195.0453.

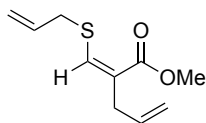

**3o**

methyl (*Z*)-2-((allylthio)methylene)pent-4-enoate (**3o**)

This compound was prepared following general procedure **2.3**, and crude mixture was purified using flash chromatography (20:1 hexane/EtOAc) to yield the desired product as colorless oil (64%). *Cation: this product is volatile. Careful rot-vap and vacuum is required.*

$^1\text{H NMR}$  (400 MHz;  $\text{CDCl}_3$ ):  $\delta$  6.78 (t,  $J = 1.0$  Hz, 1H), 5.90-5.76 (m, 2H), 5.23-5.15 (m, 2H), 5.08-5.03 (m, 2H), 3.77 (s, 3H), 3.33 (dt,  $J = 7.1, 1.1$  Hz, 2H), 3.04 (dq,  $J = 6.5, 1.3$  Hz, 2H).

$^{13}\text{C NMR}$  (100 MHz;  $\text{CDCl}_3$ ):  $\delta$  167.1, 143.8, 135.7, 134.0, 123.5, 118.0, 116.3, 51.5, 38.2, 36.8.  
HRMS:  $m/z$  (ESI) calculated for  $\text{C}_{10}\text{H}_{14}\text{O}_2\text{S}$  ( $\text{M}+\text{Na}$ ) $^+$ : 221.0607, found 221.0604.

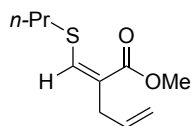

**3p**

methyl (*Z*)-2-((propylthio)methylene)pent-4-enoate (**3p**)

This compound was prepared following general procedure **2.3**, and crude mixture was purified using flash chromatography (20:1 hexane/EtOAc) to yield the desired product as colorless oil (75%). *Cation: this product is volatile. Careful rot-vap and vacuum is required.*

$^1\text{H NMR}$  (400 MHz;  $\text{CDCl}_3$ ):  $\delta$  6.80 (t,  $J = 1.0$  Hz, 1H), 5.88-5.78 (m, 1H), 5.08-5.04 (m, 2H), 3.77 (s, 3H), 3.05 (dq,  $J = 6.5, 1.3$  Hz, 2H), 2.70 (t,  $J = 7.3$  Hz, 2H), 1.69 (sextet,  $J = 7.3$  Hz, 2H), 1.02 (t,  $J = 7.3$  Hz, 3H).

$^{13}\text{C NMR}$  (100 MHz;  $\text{CDCl}_3$ ):  $\delta$  167.2, 145.9, 135.9, 122.8, 116.2, 51.4, 38.1, 36.9, 23.6, 13.1.  
HRMS:  $m/z$  (ESI) calculated for  $\text{C}_{10}\text{H}_{16}\text{O}_2\text{S}$  ( $\text{M}+\text{Na}$ ) $^+$ : 223.0763, found 223.0760.

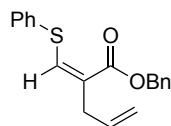

**3q**

benzyl (*Z*)-2-((phenylthio)methylene)pent-4-enoate (**3q**)

This compound was prepared following general procedure **2.3**, and crude mixture was purified using flash chromatography (20:1 hexane/EtOAc) to yield the desired product as colorless oil (90%).

$^1\text{H NMR}$  (400 MHz;  $\text{CDCl}_3$ ):  $\delta$  7.47 (dq,  $J = 6.2, 2.0$  Hz, 2H), 7.42-7.29 (m, 8H), 7.04 (t,  $J = 1.1$  Hz, 1H), 5.82 (ddt,  $J = 16.9, 10.2, 6.6$  Hz, 1H), 5.26 (s, 2H), 5.08-5.01 (m, 2H), 3.10 (dq,  $J = 6.5, 1.3$  Hz, 2H).

$^{13}\text{C NMR}$  (100 MHz;  $\text{CDCl}_3$ ):  $\delta$  166.4, 145.6, 136.9, 136.0, 135.5, 131.0, 129.3, 128.5, 128.2, 128.1, 128.0, 123.4, 116.7, 66.4, 36.8.

HRMS:  $m/z$  (ESI) calculated for  $\text{C}_{19}\text{H}_{18}\text{O}_2\text{S}$  ( $\text{M}+\text{H}$ ) $^+$ : 311.1101, found 311.1095.



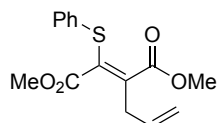

**3r**

dimethyl 2-allyl-3-(phenylthio)fumarate (**3r**)

This compound was prepared following a modified general procedure **2.3** (2% cat. was used), and crude mixture was purified using flash chromatography (20:1 hexane/EtOAc) to yield the desired product as colorless oil (74%).

**<sup>1</sup>H NMR** (400 MHz; CDCl<sub>3</sub>): δ 7.54-7.51 (m, 2H), 7.38-7.30 (m, 3H), 5.83-5.73 (m, 1H), 5.07-5.00 (m, 2H), 3.83 (s, 3H), 3.24 (s, 3H), 3.10 (dt, *J* = 6.4, 1.5 Hz, 2H).

**<sup>13</sup>C NMR** (100 MHz; CDCl<sub>3</sub>): δ 166.8, 164.4, 144.6, 135.3, 134.4, 131.3, 129.4, 128.7, 125.3, 116.5, 52.0, 51.9, 35.6.

HRMS: *m/z* (ESI) calculated for C<sub>15</sub>H<sub>16</sub>O<sub>4</sub>S (M+Na)<sup>+</sup>: 315.0661, found 315.0658.

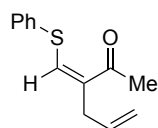

**3s**

(*Z*)-3-((phenylthio)methylene)hex-5-en-2-one (**3s**)

This compound was prepared following a modified general procedure **2.3** (2% cat. was used), and crude mixture was purified using flash chromatography (10:1 hexane/EtOAc) to yield the desired product as colorless oil (57%).

**<sup>1</sup>H NMR** (400 MHz; CDCl<sub>3</sub>): δ 7.49-7.46 (m, 2H), 7.38-7.29 (m, 3H), 6.99 (s, 1H), 5.91-5.81 (m, 1H), 5.14-5.07 (m, 2H), 3.19-3.17 (m, 2H), 2.30 (s, 3H).

**<sup>13</sup>C NMR** (100 MHz; CDCl<sub>3</sub>): δ 198.1, 145.4, 137.9, 135.7, 130.8, 129.8, 129.2, 127.9, 117.0, 37.7, 27.8.

HRMS: *m/z* (ESI) calculated for C<sub>13</sub>H<sub>14</sub>OS (M+H)<sup>+</sup>: 219.0838, found 219.0841.

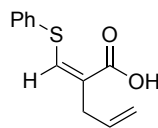

**3t**

(*Z*)-2-((phenylthio)methylene)pent-4-enoic acid (**3t**)

This compound was prepared following general procedure **2.3**, and crude mixture was purified using flash chromatography (5:1 hexane/EtOAc) to yield the desired product as white solid (90%).

**<sup>1</sup>H NMR** (400 MHz; CDCl<sub>3</sub>): δ 7.46 (dq, *J* = 6.2, 2.0 Hz, 2H), 7.38-7.30 (m, 3H), 7.14 (d, *J* = 0.9 Hz, 1H), 5.86 (ddt, *J* = 16.9, 10.2, 6.6 Hz, 1H), 5.11-5.04 (m, 2H), 3.10 (dq, *J* = 6.5, 1.3 Hz, 2H).

**<sup>13</sup>C NMR** (100 MHz; CDCl<sub>3</sub>): δ 172.2, 148.2, 136.7, 135.4, 131.0, 129.3, 128.1, 122.9, 116.7, 36.7.

HRMS: *m/z* (ESI) calculated for C<sub>12</sub>H<sub>12</sub>O<sub>2</sub>S (M+Na)<sup>+</sup>: 243.0450, found 243.0450.

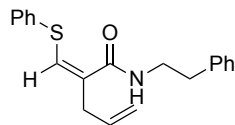

**3u**

(*Z*)-*N*-phenethyl-2-((phenylthio)methylene)pent-4-enamide (**3u**)

This compound was prepared following a modified general procedure **2.3** (0.3 mmol alkyne and 0.45 mmol sulfide were used), and crude mixture was purified using flash chromatography (3:1 hexane/EtOAc) to yield the desired product as colorless oil (66%).

**<sup>1</sup>H NMR** (400 MHz; CDCl<sub>3</sub>): δ 7.48-7.45 (m, 2H), 7.35-7.25 (m, 5H), 7.24-7.19 (m, 3H), 6.79 (s, 1H), 5.89 (br, 1H), 5.72 (dt, *J* = 17.8, 7.3 Hz, 1H), 5.01-4.95 (m, 2H), 3.62 (q, *J* = 6.4 Hz, 2H), 2.97 (dd, *J* = 6.3, 1.2 Hz, 2H), 2.86 (t, *J* = 6.9 Hz, 2H).

**<sup>13</sup>C NMR** (100 MHz; CDCl<sub>3</sub>): δ 166.9, 140.8, 138.9, 137.8, 135.6, 130.8, 129.1, 128.8, 128.6, 127.6, 126.5, 124.9, 117.5, 40.6, 37.8, 35.5.

HRMS: *m/z* (ESI) calculated for C<sub>20</sub>H<sub>21</sub>NOS (M+Na)<sup>+</sup>: 346.1236, found 346.1236.

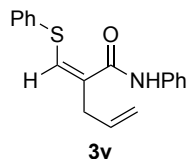

(*Z*)-*N*-phenyl-2-((phenylthio)methylene)pent-4-enamide (**3v**)

This compound was prepared following a modified general procedure **2.3** (0.3 mmol alkyne and 0.45 mmol sulfide were used), and crude mixture was purified using flash chromatography (3:1 hexane/EtOAc) to yield the desired product as white solid (63%).

**<sup>1</sup>H NMR** (400 MHz; CDCl<sub>3</sub>): δ 7.70 (br, 1H), 7.57-7.54 (m, 2H), 7.50-7.47 (m, 2H), 7.37-7.28 (m, 5H), 7.11-7.07 (m, 1H), 6.97 (t, *J* = 0.9 Hz, 1H), 6.00-5.90 (m, 1H), 5.36-5.25 (m, 2H), 3.21 (dq, *J* = 6.4, 1.2 Hz, 2H).

**<sup>13</sup>C NMR** (100 MHz; CDCl<sub>3</sub>): δ 165.0, 143.0, 137.8, 137.5, 136.2, 130.8, 129.2, 128.9, 127.8, 124.6, 124.3, 119.9, 118.1, 38.2.

HRMS: *m/z* (ESI) calculated for C<sub>18</sub>H<sub>17</sub>NOS (M+H)<sup>+</sup>: 318.0923, found 318.0921.

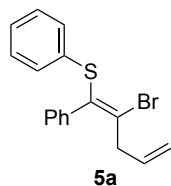

(*Z*)-(2-bromo-1-phenylpenta-1,4-dien-1-yl)(phenyl)sulfane (**5a**)

This compound was prepared following general procedure **2.5**, and crude mixture was purified using flash chromatography (pure hexane) to yield the desired product as white solid (97%).

**<sup>1</sup>H NMR** (400 MHz; CDCl<sub>3</sub>): δ 7.18-7.14 (m, 2H), 7.11-7.01 (m, 8H), 5.81 (ddt, *J* = 16.9, 10.3, 6.4 Hz, 1H), 5.12 (dq, *J* = 10.1, 1.4 Hz, 1H), 5.07 (dq, *J* = 17.0, 1.6 Hz, 1H), 3.16 (dt, *J* = 6.3, 1.5 Hz, 2H).

**<sup>13</sup>C NMR** (100 MHz; CDCl<sub>3</sub>): δ 138.2, 137.0, 134.3, 133.7, 132.6, 129.3, 128.3, 127.8, 127.6, 127.5, 122.7, 117.1, 43.4.

HRMS: *m/z* (ESI) calculated for C<sub>17</sub>H<sub>15</sub>BrS (M+IPrAu)<sup>+</sup>: 915.2617, found 915.2613.

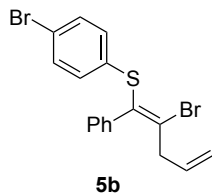

(*Z*)-(2-bromo-1-phenylpenta-1,4-dien-1-yl)(4-bromophenyl)sulfane (**5b**)

This compound was prepared following general procedure **2.5**, and crude mixture was purified using flash chromatography (pure hexane) to yield the desired product as colorless oil (94%).

**<sup>1</sup>H NMR** (400 MHz; CDCl<sub>3</sub>): δ 7.20-7.12 (m, 5H), 7.08-7.00 (m, 4H), 5.81 (ddt, *J* = 16.9, 10.3, 6.5 Hz, 1H), 5.14 (dq, *J* = 10.1, 1.4 Hz, 1H), 5.08 (dq, *J* = 17.0, 1.6 Hz, 1H), 3.17 (dt, *J* = 6.3, 1.5 Hz, 2H).

**<sup>13</sup>C NMR** (100 MHz; CDCl<sub>3</sub>): δ 137.4, 136.8, 134.8, 134.1, 131.9, 131.5, 129.3, 128.0, 127.9, 123.8, 121.9, 117.3, 43.4.

HRMS: *m/z* (ESI) calculated for C<sub>17</sub>H<sub>14</sub>Br<sub>2</sub>S (M+IPrAu)<sup>+</sup>: 993.1722, found 993.1711.

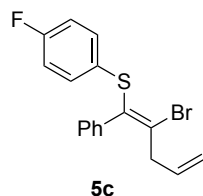

(*Z*)-(2-bromo-1-phenylpenta-1,4-dien-1-yl)(4-fluorophenyl)sulfane (**5c**)

This compound was prepared following general procedure **2.5**, and crude mixture was purified using flash chromatography (pure hexane) to yield the desired product as colorless oil (89%).

**<sup>1</sup>H NMR** (400 MHz; CDCl<sub>3</sub>): δ 7.17-7.09 (m, 5H), 7.01-6.98 (m, 2H), 6.76-6.72 (m, 2H), 5.79 (ddt, *J* = 16.9, 10.3, 6.5 Hz, 1H), 5.12 (dq, *J* = 10.1, 1.4 Hz, 1H), 5.06 (dq, *J* = 17.0, 1.6 Hz, 1H), 3.14 (dt, *J* = 6.3, 1.5 Hz, 2H).

**<sup>13</sup>C NMR** (100 MHz; CDCl<sub>3</sub>): δ 162.5 (d, *J* = 247.2 Hz), 138.3 (d, *J* = 1.2 Hz), 136.7, 136.3 (d, *J* = 8.4 Hz), 134.2, 129.3, 127.8, 127.7, 127.6, 121.7, 117.1, 115.6, 115.3, 43.3.

**<sup>19</sup>F-NMR** (376 MHz; CDCl<sub>3</sub>): δ -113.1 (tt, *J* = 8.3, 5.3 Hz, 1F).

HRMS: *m/z* (ESI) calculated for C<sub>17</sub>H<sub>14</sub>BrFS (M+IPrAu)<sup>+</sup>: 933.2523, found 933.2503.

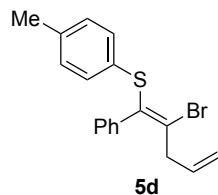

(*Z*)-(2-bromo-1-phenylpenta-1,4-dien-1-yl)(2-fluorophenyl)sulfane (**5d**)

This compound was prepared following general procedure **2.5**, and crude mixture was purified using flash chromatography (pure hexane) to yield the desired product as colorless oil (73%).

**<sup>1</sup>H NMR** (400 MHz; CDCl<sub>3</sub>): δ 7.13-7.01 (m, 7H), 6.86-6.84 (m, 2H), 5.80 (ddt, *J* = 16.9, 10.3, 6.4 Hz, 1H), 5.12 (dq, *J* = 10.1, 1.4 Hz, 1H), 5.07 (dq, *J* = 17.0, 1.6 Hz, 1H), 3.14 (dt, *J* = 6.3, 1.5 Hz, 2H), 2.18 (s, 3H).

**<sup>13</sup>C NMR** (100 MHz; CDCl<sub>3</sub>): δ 138.6, 137.7, 137.1, 134.3, 133.9, 129.3, 129.1, 128.8, 127.7, 127.5, 121.9, 117.0, 43.4, 21.0.

HRMS: *m/z* (ESI) calculated for C<sub>18</sub>H<sub>17</sub>BrS (M+IPrAu)<sup>+</sup>: 929.2773, found 929.2760.

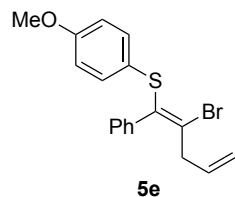

(Z)-(2-bromo-1-phenylpenta-1,4-dien-1-yl)(4-methoxyphenyl)sulfane (**5e**)

This compound was prepared following general procedure **2.5**, and crude mixture was purified using flash chromatography (40:1 hexane/EtOAc) to yield the desired product as colorless oil (73%). *Cation: this product is prone to E/Z isomerization over time on column. Fast purification is required.*

**<sup>1</sup>H NMR** (400 MHz; CDCl<sub>3</sub>): δ 7.11-7.07 (m, 5H), 6.98-6.96 (m, 2H), 6.58-6.55 (m, 2H), 5.78 (ddt, *J* = 16.9, 10.3, 6.5 Hz, 1H), 5.11 (dq, *J* = 10.1, 1.4 Hz, 1H), 5.05 (dq, *J* = 17.0, 1.6 Hz, 1H), 3.68 (s, 3H), 3.11 (dt, *J* = 6.3, 1.5 Hz, 2H).

**<sup>13</sup>C NMR** (100 MHz; CDCl<sub>3</sub>): δ 159.6, 139.2, 136.9, 136.4, 134.3, 129.3, 127.7, 127.5, 122.9, 120.2, 117.0, 113.9, 55.1, 43.3.

HRMS: *m/z* (ESI) calculated for C<sub>18</sub>H<sub>17</sub>BrOS (M+IPrAu)<sup>+</sup>: 945.2722, found 945.2699.

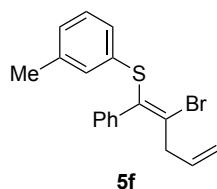

(Z)-(2-bromo-1-phenylpenta-1,4-dien-1-yl)(*m*-tolyl)sulfane (**5f**)

This compound was prepared following general procedure **2.5**, and crude mixture was purified using flash chromatography (pure hexane) to yield the desired product as colorless oil (81%).

**<sup>1</sup>H NMR** (400 MHz; CDCl<sub>3</sub>): δ 7.13-7.03 (m, 5H), 6.98-6.91 (m, 3H), 6.87-6.85 (m, 1H), 5.87-5.77 (m, 1H), 5.13 (dq, *J* = 10.1, 1.4 Hz, 1H), 5.08 (dq, *J* = 17.0, 1.6 Hz, 1H), 3.17 (dt, *J* = 6.3, 1.5 Hz, 2H), 2.14 (s, 3H).

**<sup>13</sup>C NMR** (100 MHz; CDCl<sub>3</sub>): δ 138.2, 138.0, 137.1, 134.30, 134.26, 132.2, 130.5, 129.3, 128.3, 128.1, 127.7, 127.6, 122.6, 117.1, 43.4, 21.0.

HRMS: *m/z* (ESI) calculated for C<sub>18</sub>H<sub>17</sub>BrS (M+IPrAu)<sup>+</sup>: 929.2773, found 929.2745.

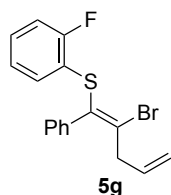

(Z)-(2-bromo-1-phenylpenta-1,4-dien-1-yl)(2-fluorophenyl)sulfane (**5g**)

This compound was prepared following general procedure **2.5**, and crude mixture was purified using flash chromatography (pure hexane) to yield the desired product as colorless oil (92%).

**<sup>1</sup>H NMR** (400 MHz; CDCl<sub>3</sub>): δ 7.21 (td, *J* = 7.5, 1.8 Hz, 1H), 7.11-7.05 (m, 6H), 6.86-6.76 (m, 2H), 5.84-5.74 (m, 1H), 5.13 (dq, *J* = 10.1, 1.4 Hz, 1H), 5.08 (dq, *J* = 17.0, 1.6 Hz, 1H), 3.14 (dt, *J* = 6.3, 1.5 Hz, 2H).

**<sup>13</sup>C NMR** (100 MHz; CDCl<sub>3</sub>): δ 162.2 (d, *J* = 246.3 Hz), 137.5, 136.5, 134.2, 130.6 (d, *J* = 8.0 Hz), 129.1, 127.7, 123.8 (d, *J* = 3.9 Hz), 121.6, 119.7 (d, *J* = 18.0 Hz), 117.1, 115.4 (d, *J* = 22.8 Hz), 43.3.

**<sup>19</sup>F-NMR** (376 MHz; CDCl<sub>3</sub>): δ -105.7 (m, 1F).

HRMS: *m/z* (ESI) calculated for C<sub>17</sub>H<sub>14</sub>BrFS (M+IPrAu)<sup>+</sup>: 933.2523, found 933.2509.

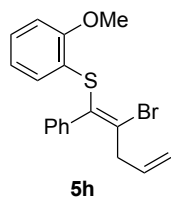

**(Z)-2-bromo-1-phenylpenta-1,4-dien-1-yl(2-methoxyphenyl)sulfane (5h)**

This compound was prepared following general procedure **2.5**, and crude mixture was purified using flash chromatography (40:1 hexane/EtOAc) to yield the desired product as colorless oil (75%). *Cation: this product is prone to E/Z isomerization over time on column. Fast purification is required.*

**<sup>1</sup>H NMR** (400 MHz; CDCl<sub>3</sub>): δ 7.23 (dd, *J* = 7.6, 1.7 Hz, 1H), 7.10-7.02 (m, 6H), 6.70-6.66 (m, 1H), 6.55 (dd, *J* = 8.3, 1.0 Hz, 1H), 5.85-5.76 (m, 1H), 5.15-5.06 (m, 2H), 3.71 (s, 3H), 3.15 (dt, *J* = 6.2, 1.5 Hz, 2H).

**<sup>13</sup>C NMR** (100 MHz; CDCl<sub>3</sub>): δ 158.8, 138.4, 136.9, 135.9, 134.5, 129.9, 129.1, 127.41, 127.24, 121.0, 120.34, 120.30, 116.8, 110.4, 55.4, 43.3, 36.4.

HRMS: *m/z* (ESI) calculated for C<sub>18</sub>H<sub>17</sub>BrOS (M+IPrAu)<sup>+</sup>: 945.2722, found 945.2703.

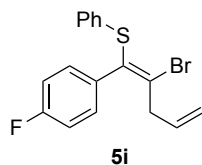

**(Z)-2-bromo-1-(4-fluorophenyl)penta-1,4-dien-1-yl(phenyl)sulfane (5i)**

This compound was prepared following general procedure **2.5**, and crude mixture was purified using flash chromatography (pure hexane) to yield the desired product as colorless oil (94%).

**<sup>1</sup>H NMR** (400 MHz; CDCl<sub>3</sub>): δ 7.17-7.15 (m, 2H), 7.10-7.01 (m, 4H), 6.81-6.77 (m, 2H), 5.86-5.76 (m, 1H), 5.14 (dt, *J* = 10.1, 1.4 Hz, 1H), 5.10-5.05 (m, 1H), 3.15 (dt, *J* = 6.3, 1.4 Hz, 2H).

**<sup>13</sup>C NMR** (100 MHz; CDCl<sub>3</sub>): δ 161.9 (d, *J* = 246.6 Hz), 137.3, 134.1, 133.8, 132.9 (d, *J* = 3.4 Hz), 132.4, 131.0 (d, *J* = 8.2 Hz), 128.5, 127.8, 122.8, 117.2, 114.8 (d, *J* = 21.6 Hz), 43.4.

**<sup>19</sup>F-NMR** (376 MHz; CDCl<sub>3</sub>): δ -113.5 (tt, *J* = 9.0, 5.3 Hz, 1F).

HRMS: *m/z* (ESI) calculated for C<sub>17</sub>H<sub>14</sub>BrFS (M+IPrAu)<sup>+</sup>: 933.2523, found 933.2511.

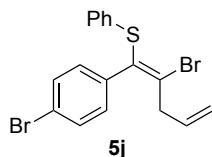

**(Z)-2-bromo-1-(4-bromophenyl)penta-1,4-dien-1-yl(phenyl)sulfane (5j)**

This compound was prepared following general procedure **2.5**, and crude mixture was purified using flash chromatography (pure hexane) to yield the desired product as colorless oil (91%).

**<sup>1</sup>H NMR** (400 MHz; CDCl<sub>3</sub>): δ 7.24-7.21 (m, 2H), 7.16-7.12 (m, 2H), 7.10-7.05 (m, 3H), 6.94-6.91 (m, 2H), 5.79 (ddt, *J* = 16.9, 10.3, 6.4 Hz, 1H), 5.13 (dq, *J* = 10.1, 1.4 Hz, 1H), 5.06 (dq, *J* = 17.0, 1.6 Hz, 1H), 3.14 (dt, *J* = 6.2, 1.5 Hz, 2H).

**<sup>13</sup>C NMR** (100 MHz; CDCl<sub>3</sub>): δ 137.0, 136.1, 133.9, 133.5, 132.2, 131.0, 130.9, 128.6, 127.9, 123.7, 121.8, 117.3, 43.4.

HRMS: *m/z* (ESI) calculated for C<sub>17</sub>H<sub>14</sub>Br<sub>2</sub>S (M+IPrAu)<sup>+</sup>: 993.1722, found 993.1689.

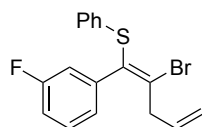

**5k**

(Z)-2-bromo-1-(3-fluorophenyl)penta-1,4-dien-1-yl(phenyl)sulfane (**5k**)

This compound was prepared following general procedure **2.5**, and crude mixture was purified using flash chromatography (pure hexane) to yield the desired product as colorless oil (87%).

**<sup>1</sup>H NMR** (400 MHz; CDCl<sub>3</sub>): δ 7.20-7.16 (m, 2H), 7.12-7.04 (m, 4H), 6.84 (dt, *J* = 7.7, 1.2 Hz, 1H), 6.81-6.76 (m, 2H), 5.81 (ddt, *J* = 16.9, 10.3, 6.4 Hz, 1H), 5.15 (dq, *J* = 10.1, 1.4 Hz, 1H), 5.08 (dq, *J* = 17.0, 1.5 Hz, 1H), 3.17 (dt, *J* = 6.3, 1.5 Hz, 2H).

**<sup>13</sup>C NMR** (100 MHz; CDCl<sub>3</sub>): δ 162.1 (d, *J* = 245.6 Hz), 139.1 (d, *J* = 7.9 Hz), 137.0 (d, *J* = 2.1 Hz), 133.9, 133.8, 132.2, 129.3 (d, *J* = 8.4 Hz), 128.5, 127.9, 125.2 (d, *J* = 2.9 Hz), 123.5, 117.3, 116.3 (d, *J* = 22.2 Hz), 114.6 (d, *J* = 20.9 Hz), 43.4.

**<sup>19</sup>F-NMR** (376 MHz; CDCl<sub>3</sub>): δ -113.4 (dt, *J* = 9.0, 5.6 Hz, 1F).

HRMS: *m/z* (ESI) calculated for C<sub>17</sub>H<sub>14</sub>BrFS (M+IPrAu)<sup>+</sup>: 933.2523, found 933.2494.

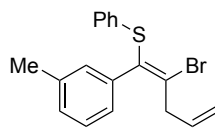

**5l**

(Z)-2-bromo-1-(*m*-tolyl)penta-1,4-dien-1-yl(phenyl)sulfane (**5l**)

This compound was prepared following general procedure **2.5**, and crude mixture was purified using flash chromatography (pure hexane) to yield the desired product as colorless oil (76%).

**<sup>1</sup>H NMR** (400 MHz; CDCl<sub>3</sub>): δ 7.16 (dt, *J* = 4.8, 2.4 Hz, 2H), 7.06-7.03 (m, 3H), 6.97 (t, *J* = 7.8 Hz, 1H), 6.88-6.84 (m, 3H), 5.81 (ddt, *J* = 16.8, 10.3, 6.4 Hz, 1H), 5.14-5.05 (m, 2H), 3.17 (dt, *J* = 6.3, 1.1 Hz, 2H), 2.16 (s, 3H).

**<sup>13</sup>C NMR** (100 MHz; CDCl<sub>3</sub>): δ 138.2, 137.3, 136.9, 134.4, 133.6, 132.7, 130.0, 128.3, 128.2, 127.6, 127.5, 126.4, 122.8, 117.1, 43.5, 21.1.

HRMS: *m/z* (ESI) calculated for C<sub>18</sub>H<sub>17</sub>BrS (M+IPrAu)<sup>+</sup>: 929.2773, found 929.2761.

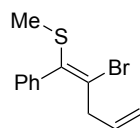

**5m**

(Z)-2-bromo-1-phenylpenta-1,4-dien-1-yl(methyl)sulfane (**5m**)

This compound was prepared following general procedure **2.5**, and crude mixture was purified using flash chromatography (pure hexane) to yield the desired product as colorless oil (74%).

**<sup>1</sup>H NMR** (400 MHz; CDCl<sub>3</sub>): δ 7.41-7.31 (m, 3H), 7.21-7.18 (m, 2H), 5.79-5.69 (m, 1H), 5.08 (dq, *J* = 10.1, 1.5 Hz, 1H), 5.02 (dq, *J* = 17.0, 1.6 Hz, 1H), 3.07 (dt, *J* = 6.3, 1.5 Hz, 2H), 1.79 (s, 3H).

**<sup>13</sup>C NMR** (100 MHz; CDCl<sub>3</sub>): δ 138.4, 136.6, 134.4, 129.0, 128.6, 128.1, 119.3, 116.8, 43.1, 16.0.

HRMS: *m/z* (ESI) calculated for C<sub>12</sub>H<sub>13</sub>BrS (M+IPrAu)<sup>+</sup>: 853.2460, found 853.2449.

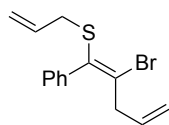

**5n**

(Z)-allyl(2-bromo-1-phenylpenta-1,4-dien-1-yl)sulfane (**5n**)

This compound was prepared following general procedure **2.5**, and crude mixture was purified using flash chromatography (pure hexane) to yield the desired product as colorless oil (64%).

**<sup>1</sup>H NMR** (400 MHz; CDCl<sub>3</sub>): δ 7.39-7.30 (m, 3H), 7.24-7.22 (m, 2H), 5.75 (ddt, *J* = 16.9, 10.3, 6.4 Hz, 1H), 5.64 (tt, *J* = 12.2, 4.6 Hz, 1H), 5.09 (dq, *J* = 10.1, 1.4 Hz, 1H), 5.03 (dq, *J* = 17.1, 1.6 Hz, 1H), 4.98-4.96 (m, 1H), 4.91 (dq, *J* = 16.9, 1.3 Hz, 1H), 3.09 (dt, *J* = 6.3, 1.3 Hz, 2H), 3.09 (dt, *J* = 6.3, 1.3 Hz, 2H), 2.89 (dt, *J* = 6.7, 1.1 Hz, 2H), 2.89 (dt, *J* = 6.7, 1.1 Hz, 2H).

**<sup>13</sup>C NMR** (100 MHz; CDCl<sub>3</sub>): δ 137.4, 136.9, 134.3, 133.6, 129.2, 128.4, 128.2, 121.7, 117.5, 116.9, 43.1, 35.7.

HRMS: *m/z* (ESI) calculated for C<sub>14</sub>H<sub>15</sub>BrS (M+IPrAu)<sup>+</sup>: 879.2617, found 879.2602.

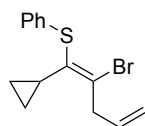

**5o**

(Z)-(2-bromo-1-cyclopropylpenta-1,4-dien-1-yl)(phenyl)sulfane (**5o**)

This compound was prepared following general procedure **2.5**, and crude mixture was purified using flash chromatography (pure hexane) to yield the desired product as colorless oil (67%).

**<sup>1</sup>H NMR** (400 MHz; CDCl<sub>3</sub>): δ 7.29-7.24 (m, 4H), 7.20-7.16 (m, 1H), 5.96-5.86 (m, 1H), 5.25-5.18 (m, 2H), 3.63 (dt, *J* = 6.2, 1.5 Hz, 2H), 1.68-1.61 (m, 1H), 0.68-0.65 (m, 4H).

**<sup>13</sup>C NMR** (100 MHz; CDCl<sub>3</sub>): δ 136.0, 135.3, 133.4, 130.1, 129.0, 128.8, 126.1, 117.1, 43.0, 14.8, 8.1.

HRMS: *m/z* (ESI) calculated for C<sub>14</sub>H<sub>15</sub>BrS (M+IPrAu)<sup>+</sup>: 879.2617, found 879.2603.

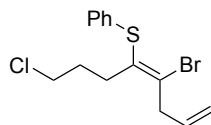

**5p**

(Z)-(5-bromo-1-chloroocta-4,7-dien-4-yl)(phenyl)sulfane (**5p**)

This compound was prepared following general procedure **2.5**, and crude mixture was purified using flash chromatography (pure hexane) to yield the desired product as colorless oil (80%).

**<sup>1</sup>H NMR** (400 MHz; CDCl<sub>3</sub>): δ 7.38-7.28 (m, 5H), 5.87 (ddt, *J* = 17.0, 10.1, 6.2 Hz, 1H), 5.24-5.17 (m, 2H), 3.44 (dt, *J* = 6.2, 1.5 Hz, 2H), 3.37 (t, *J* = 6.2 Hz, 2H), 2.39-2.36 (m, 2H), 1.92-1.85 (m, 2H).

**<sup>13</sup>C NMR** (100 MHz; CDCl<sub>3</sub>): δ 134.8, 133.6, 133.2, 132.1, 129.1, 127.7, 125.4, 117.2, 44.1, 42.8, 31.3, 29.5.

HRMS: *m/z* (ESI) calculated for C<sub>14</sub>H<sub>16</sub>BrClS (M+IPrAu)<sup>+</sup>: 915.2384, found 915.2364.

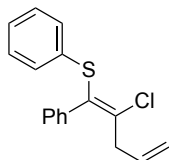

**5q**

**(Z)-(2-chloro-1-phenylpenta-1,4-dien-1-yl)(phenyl)sulfane (5q)**

This compound was prepared following general procedure **2.5**, and crude mixture was purified using flash chromatography (pure hexane) to yield the desired product as colorless oil (92%).

**<sup>1</sup>H NMR** (400 MHz; CDCl<sub>3</sub>): δ 7.18-7.16 (m, 2H), 7.13-7.04 (m, 8H), 5.83 (ddt, *J* = 16.8, 10.3, 6.4 Hz, 1H), 5.14-5.06 (m, 2H), 3.07 (dt, *J* = 6.3, 1.5 Hz, 2H).

**<sup>13</sup>C NMR** (100 MHz; CDCl<sub>3</sub>): δ 136.8, 134.7, 133.7, 133.3, 132.5, 130.7, 129.5, 128.4, 127.8, 127.6, 127.4, 117.3, 41.4.

HRMS: *m/z* (ESI) calculated for C<sub>17</sub>H<sub>15</sub>ClS (M+IPrAu)<sup>+</sup>: 871.3122, found 871.3207.

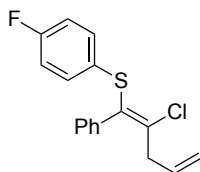

**5r**

**(Z)-(2-chloro-1-phenylpenta-1,4-dien-1-yl)(4-fluorophenyl)sulfane (5r)**

This compound was prepared following general procedure **2.5**, and crude mixture was purified using flash chromatography (pure hexane) to yield the desired product as colorless oil (90%).

**<sup>1</sup>H NMR** (400 MHz; CDCl<sub>3</sub>): δ 7.16-7.09 (m, 5H), 7.03-7.01 (m, 2H), 6.77-6.71 (m, 2H), 5.81 (ddt, *J* = 16.9, 10.3, 6.5 Hz, 1H), 5.13-5.04 (m, 2H), 3.03 (dt, *J* = 6.3, 1.5 Hz, 2H).

**<sup>13</sup>C NMR** (100 MHz; CDCl<sub>3</sub>): δ 162.4 (d, *J* = 247 Hz), 136.5, 136.1 (d, *J* = 8.3 Hz), 134.9, 133.6, 129.56, 129.51, 127.9, 127.7, 127.5 (d, *J* = 3.4 Hz), 117.3, 115.4 (d, *J* = 21.9 Hz), 41.4.

**<sup>19</sup>F-NMR** (376 MHz; CDCl<sub>3</sub>): δ -113.4 (tt, *J* = 9.0, 6.0 Hz, 1F).

HRMS: *m/z* (ESI) calculated for C<sub>17</sub>H<sub>14</sub>ClFS (M+IPrAu)<sup>+</sup>: 889.3028, found 889.3013.

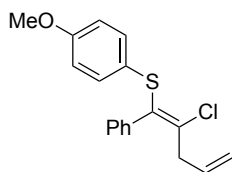

**5s**

**(Z)-(2-chloro-1-phenylpenta-1,4-dien-1-yl)(4-methoxyphenyl)sulfane (5s)**

This compound was prepared following general procedure **2.5**, and crude mixture was purified using flash chromatography (pure hexane) to yield the desired product as colorless oil (92%).

*Cation: this product is prone to E/Z isomerization over time on column. Fast purification is required.*

**<sup>1</sup>H NMR** (400 MHz; CDCl<sub>3</sub>): δ 7.12-7.08 (m, 5H), 7.02-6.99 (m, 2H), 6.60-6.56 (m, 2H), 5.81 (ddt, *J* = 16.9, 10.3, 6.5 Hz, 1H), 5.12-5.04 (m, 2H), 3.68 (s, 3H), 3.01 (dt, *J* = 6.3, 1.5 Hz, 2H).

**<sup>13</sup>C NMR** (100 MHz; CDCl<sub>3</sub>): δ 159.5, 136.7, 136.2, 135.9, 133.8, 129.5, 128.0, 127.8, 127.5, 122.7, 117.1, 113.9, 55.2, 41.4.

HRMS: *m/z* (ESI) calculated for C<sub>18</sub>H<sub>17</sub>ClOS (M+IPrAu)<sup>+</sup>: 901.3228, found 901.3215.



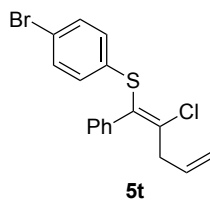

**(Z)-(4-bromophenyl)(2-chloro-1-phenylpenta-1,4-dien-1-yl)sulfane (5t)**

This compound was prepared following general procedure **2.5**, and crude mixture was purified using flash chromatography (pure hexane) to yield the desired product as colorless oil (91%).

**<sup>1</sup>H NMR** (400 MHz; CDCl<sub>3</sub>): δ 7.19-7.12 (m, 5H), 7.09-7.06 (m, 2H), 7.02 (t, *J* = 2.2 Hz, 1H), 7.00 (t, *J* = 2.3 Hz, 1H), 5.82 (ddt, *J* = 16.8, 10.3, 6.4 Hz, 1H), 5.12 (dq, *J* = 10.1, 1.3 Hz, 1H), 5.07 (dq, *J* = 17.0, 1.5 Hz, 1H), 3.06 (dt, *J* = 6.3, 1.4 Hz, 2H).

**<sup>13</sup>C NMR** (100 MHz; CDCl<sub>3</sub>): δ 136.6, 134.4, 133.9, 133.5, 131.92, 131.79, 131.5, 129.5, 128.0, 127.9, 121.7, 117.4, 41.4.

HRMS: *m/z* (ESI) calculated for C<sub>17</sub>H<sub>14</sub>BrClS (M+IPrAu)<sup>+</sup>: 949.2227, found 949.2210.

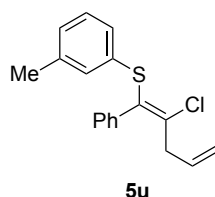

**(Z)-(2-chloro-1-phenylpenta-1,4-dien-1-yl)(*m*-tolyl)sulfane (5u)**

This compound was prepared following general procedure **2.5**, and crude mixture was purified using flash chromatography (pure hexane) to yield the desired product as colorless oil (87%).

**<sup>1</sup>H NMR** (400 MHz; CDCl<sub>3</sub>): δ 7.14-7.06 (m, 5H), 6.98-6.92 (m, 3H), 6.87-6.84 (m, 1H), 5.88-5.78 (m, 1H), 5.14-5.05 (m, 2H), 3.07 (dt, *J* = 6.3, 1.5 Hz, 2H), 2.14 (s, 3H).

**<sup>13</sup>C NMR** (100 MHz; CDCl<sub>3</sub>): δ 138.0, 136.9, 134.7, 133.85, 133.75, 132.2, 130.6, 130.1, 129.5, 128.16, 128.14, 127.7, 127.6, 117.2, 41.4, 21.0.

HRMS: *m/z* (ESI) calculated for C<sub>18</sub>H<sub>17</sub>ClS (M+IPrAu)<sup>+</sup>: 885.3278, found 885.3170.

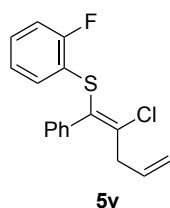

**(Z)-(2-chloro-1-phenylpenta-1,4-dien-1-yl)(2-fluorophenyl)sulfane (5v)**

This compound was prepared following general procedure **2.5**, and crude mixture was purified using flash chromatography (pure hexane) to yield the desired product as colorless oil (90%).

**<sup>1</sup>H NMR** (400 MHz; CDCl<sub>3</sub>): δ 7.19 (td, *J* = 7.5, 1.8 Hz, 1H), 7.09-7.03 (m, 6H), 6.85-6.76 (m, 2H), 5.80 (ddt, *J* = 16.9, 10.3, 6.4 Hz, 1H), 5.12-5.04 (m, 2H), 3.02 (dt, *J* = 6.3, 1.5 Hz, 2H).

**<sup>13</sup>C NMR** (100 MHz; CDCl<sub>3</sub>): δ 162.1 (d, *J* = 246.2 Hz), 136.3, 134.0, 133.6, 130.4 (d, *J* = 7.9 Hz), 129.6, 129.3, 127.7, 123.9 (d, *J* = 3.9 Hz), 119.5 (d, *J* = 17.9 Hz), 117.2, 115.4 (d, *J* = 22.8 Hz), 41.3.

**<sup>19</sup>F-NMR** (376 MHz; CDCl<sub>3</sub>): δ -106.1 (m, 1F).

HRMS: *m/z* (ESI) calculated for C<sub>17</sub>H<sub>14</sub>ClFS (M+IPrAu)<sup>+</sup>: 889.3028, found 889.3021.

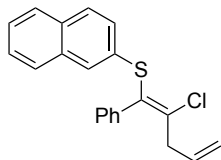

**5w**

(Z)-(2-chloro-1-phenylpenta-1,4-dien-1-yl)(naphthalen-2-yl)sulfane (**5w**)

This compound was prepared following general procedure **2.5**, and crude mixture was purified using flash chromatography (pure hexane) to yield the desired product as colorless oil (83%).

**<sup>1</sup>H NMR** (400 MHz; CDCl<sub>3</sub>): δ 7.70-7.69 (m, 1H), 7.66-7.60 (m, 2H), 7.50 (d, *J* = 8.6 Hz, 1H), 7.40-7.32 (m, 2H), 7.19 (dd, *J* = 8.6, 1.8 Hz, 1H), 7.16-7.12 (m, 2H), 7.08-6.98 (m, 3H), 5.86 (ddt, *J* = 16.9, 10.3, 6.4 Hz, 1H), 5.16-5.08 (m, 2H), 3.11 (dt, *J* = 6.3, 1.5 Hz, 2H).

**<sup>13</sup>C NMR** (100 MHz; CDCl<sub>3</sub>): δ 137.0, 134.4, 133.7, 133.2, 132.2, 131.9, 131.7, 130.2, 130.0, 129.5, 127.90, 127.85, 127.76, 127.55, 127.36, 126.26, 126.17, 117.4, 41.5.

HRMS: *m/z* (ESI) calculated for C<sub>21</sub>H<sub>17</sub>ClS (M+IPrAu)<sup>+</sup>: 921.3278, found 921.3271.

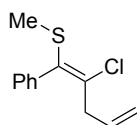

**5x**

(Z)-(2-chloro-1-phenylpenta-1,4-dien-1-yl)(methyl)sulfane (**5x**)

This compound was prepared following general procedure **2.5**, and crude mixture was purified using flash chromatography (pure hexane) to yield the desired product as colorless oil (84%).

**<sup>1</sup>H NMR** (400 MHz; CDCl<sub>3</sub>): δ 7.41-7.36 (m, 2H), 7.35-7.31 (m, 1H), 7.22-7.19 (m, 2H), 5.81-5.71 (m, 1H), 5.09-4.99 (m, 2H), 2.96 (dt, *J* = 6.3, 1.4 Hz, 2H), 1.80 (s, 3H).

**<sup>13</sup>C NMR** (100 MHz; CDCl<sub>3</sub>): δ 136.2, 135.1, 133.8, 129.2, 128.5, 128.1, 126.9, 116.9, 41.1, 15.4.

HRMS: *m/z* (ESI) calculated for C<sub>12</sub>H<sub>13</sub>ClS (M+IPrAu)<sup>+</sup>: 809.2965, found 809.2959.

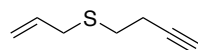

**6a**

allyl(but-3-yn-1-yl)sulfane (**6a**)

This compound was prepared following general procedure **2.6**, and crude mixture was purified using flash chromatography (40:1 hexane/EtOAc) to yield the desired product as colorless oil (70%). *Cation: this product is volatile. Careful rot-vap and vacuum is required.*

**<sup>1</sup>H NMR** (400 MHz, CDCl<sub>3</sub>) δ 5.68 (ddt, *J* = 17.0, 9.9, 7.2 Hz, 1H), 5.03-4.99 (m, 2H), 3.07 (d, *J* = 7.6 Hz, 2H), 2.53 (t, *J* = 7.2 Hz, 2H), 2.35 (dt, *J* = 7.2, 2.4 Hz, 2H), 1.92 (t, *J* = 2.8 Hz, 1H).

**<sup>13</sup>C NMR** (101 MHz, CDCl<sub>3</sub>) δ 133.98, 117.14, 82.51, 69.20, 34.61, 29.15, 19.46.

HRMS: *m/z* (ESI) calculated for C<sub>7</sub>H<sub>10</sub>S (M+IPrAu)<sup>+</sup>: 711.3042, found 711.3019.

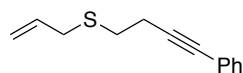

**6b**

allyl(4-phenylbut-3-yn-1-yl)sulfane (**6b**)

This compound was prepared following general procedure **2.6**, and crude mixture was purified using flash chromatography (40:1 hexane/EtOAc) to yield the desired product as colorless oil (76%).

**<sup>1</sup>H NMR** (400 MHz, CDCl<sub>3</sub>) δ 7.47-7.36 (m, 2H), 7.32-7.20 (m, 3H), 5.80 (ddt, *J* = 17.1, 9.9, 7.2 Hz, 1H), 5.23-5.00 (m, 2H), 3.21 (d, *J* = 7.2 Hz, 2H), 2.76-2.49 (m, 4H).

**<sup>13</sup>C NMR** (100 MHz, CDCl<sub>3</sub>) δ 134.2, 131.6, 128.2, 127.8, 123.5, 117.3, 88.3, 81.5, 34.9, 29.5, 20.8.

HRMS: *m/z* (ESI) calculated for C<sub>13</sub>H<sub>14</sub>S (M+IPrAu)<sup>+</sup>: 787.3355, found 787.3335.

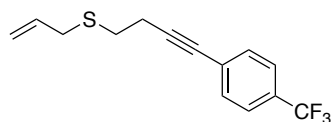

**6c**

allyl(4-(4-(trifluoromethyl)phenyl)but-3-yn-1-yl)sulfane (**6c**)

This compound was prepared following general procedure **2.6**, and crude mixture was purified using flash chromatography (40:1 hexane/EtOAc) to yield the desired product as pale yellow oil (75%).

**<sup>1</sup>H NMR** (400 MHz, CDCl<sub>3</sub>) δ 7.50 (dd, *J* = 19.2, 8.4 Hz, 4H), 5.80 (ddt, *J* = 17.1, 10.0, 7.2 Hz, 1H), 5.26-4.75 (m, 2H), 3.20 (d, *J* = 7.2 Hz, 2H), 2.69 (dd, *J* = 5.9, 4.1 Hz, 4H).

**<sup>13</sup>C NMR** (100 MHz, CDCl<sub>3</sub>) δ 134.1, 131.8, 129.5 (q, *J* = 32.5 Hz), 126.3 (q, *J* = 210.3 Hz), 125.1 (q, *J* = 3.5 Hz), 117.3, 91.0, 80.3, 34.8, 29.3, 20.7.

**<sup>19</sup>F NMR** (376 MHz, CDCl<sub>3</sub>) δ -62.8 (s, 3F).

HRMS: *m/z* (ESI) calculated for C<sub>14</sub>H<sub>13</sub>F<sub>3</sub>S (M+IPrAu)<sup>+</sup>: 855.3229, found 855.3202.

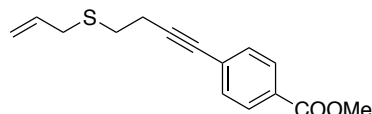

**6d**

methyl 4-(4-(allylthio)but-1-yn-1-yl)benzoate (**6d**)

This compound was prepared following general procedure **2.6**, and crude mixture was purified using flash chromatography (20:1 hexane/EtOAc) to yield the desired product as pale yellow oil (70%).

**<sup>1</sup>H NMR** (400 MHz, CDCl<sub>3</sub>) δ 7.93 (d, *J* = 8.3 Hz, 2H), 7.42 (d, *J* = 8.3 Hz, 2H), 5.78 (ddt, *J* = 17.0, 9.9, 7.2 Hz, 1H), 5.25-4.96 (m, 2H), 3.87 (s, 3H), 3.19 (d, *J* = 7.1 Hz, 2H), 2.68 (t, *J* = 3.9 Hz, 4H).

**<sup>13</sup>C NMR** (100 MHz, CDCl<sub>3</sub>) δ 166.5, 134.1, 131.5, 129.4, 129.1, 128.3, 117.3, 91.6, 80.9, 52.1, 34.8, 29.3, 20.8.

HRMS: *m/z* (ESI) calculated for C<sub>15</sub>H<sub>16</sub>O<sub>2</sub>S (M+IPrAu)<sup>+</sup>: 845.3410, found 845.3381.

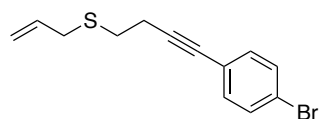

**6e**

allyl(4-(4-bromophenyl)but-3-yn-1-yl)sulfane (**6e**)

This compound was prepared following general procedure **2.6**, and crude mixture was purified using flash chromatography (40:1 hexane/EtOAc) to yield the desired product as pale yellow oil (62%).

**<sup>1</sup>H NMR** (400 MHz, CDCl<sub>3</sub>) δ 7.39 (d, *J* = 8.5 Hz, 2H), 7.23 (d, *J* = 8.4 Hz, 2H), 5.79 (ddt, *J* = 17.1, 9.9, 7.2 Hz, 1H), 5.20-4.91 (m, 2H), 3.19 (d, *J* = 7.2 Hz, 2H), 2.80-2.54 (m, 4H).

**<sup>13</sup>C NMR** (100 MHz, CDCl<sub>3</sub>) δ 134.1, 133.0, 131.4, 122.5, 121.9, 117.3, 89.5, 80.5, 34.8, 29.4, 20.7.

HRMS: *m/z* (ESI) calculated for C<sub>13</sub>H<sub>13</sub>BrS (M+IPrAu)<sup>+</sup>: 865.2460, found 865.2431.

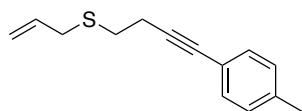

**6f**

allyl(4-(*p*-tolyl)but-3-yn-1-yl)sulfane (**6f**)

This compound was prepared following general procedure **2.6**, and crude mixture was purified using flash chromatography (40:1 hexane/EtOAc) to yield the desired product as pale yellow oil (78%).

**<sup>1</sup>H NMR** (400 MHz, CDCl<sub>3</sub>) δ 7.29 (d, *J* = 8.0 Hz, 2H), 7.07 (d, *J* = 7.9 Hz, 2H), 5.80 (ddt, *J* = 17.0, 9.9, 7.2 Hz, 1H), 5.23-4.87 (m, 2H), 3.21 (d, *J* = 7.1 Hz, 2H), 2.67 (dt, *J* = 12.1, 6.1 Hz, 4H), 2.32 (s, 3H).

**<sup>13</sup>C NMR** (100 MHz, CDCl<sub>3</sub>) δ 137.8, 134.2, 131.4, 128.9, 120.4, 117.2, 87.5, 81.5, 34.8, 29.6, 21.4, 20.8.

HRMS: *m/z* (ESI) calculated for C<sub>14</sub>H<sub>16</sub>S (M+IPrAu)<sup>+</sup>: 801.3512, found 801.3489.

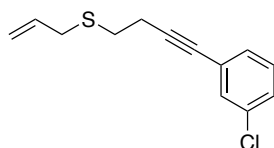

**6g**

allyl(4-(3-chlorophenyl)but-3-yn-1-yl)sulfane (**6g**)

This compound was prepared following general procedure **2.6**, and crude mixture was purified using flash chromatography (40:1 hexane/EtOAc) to yield the desired product as pale yellow oil (69%).

**<sup>1</sup>H NMR** (400 MHz, CDCl<sub>3</sub>) δ 7.37 (s, 1H), 7.22 (dq, *J* = 24.5, 7.6 Hz, 3H), 5.79 (ddt, *J* = 17.1, 9.9, 7.2 Hz, 1H), 5.13 (dd, *J* = 13.9, 5.2 Hz, 2H), 3.20 (d, *J* = 7.1 Hz, 2H), 2.77-2.55 (m, 4H).

**<sup>13</sup>C NMR** (100 MHz, CDCl<sub>3</sub>) δ 134.1, 134.0, 131.5, 129.7, 129.4, 128.1, 125.2, 117.3, 89.7, 80.2, 34.8, 29.4, 20.6.

HRMS: *m/z* (ESI) calculated for C<sub>13</sub>H<sub>13</sub>ClS (M+IPrAu)<sup>+</sup>: 821.2965, found 821.2940.

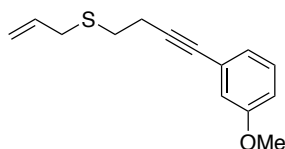

**6h**

allyl(4-(3-methoxyphenyl)but-3-yn-1-yl)sulfane (**6h**)

This compound was prepared following general procedure **2.6**, and crude mixture was purified using flash chromatography (20:1 hexane/EtOAc) to yield the desired product as pale yellow oil (65%).

**<sup>1</sup>H NMR** (400 MHz, CDCl<sub>3</sub>) δ 7.19 (d, *J* = 7.9 Hz, 1H), 6.99 (d, *J* = 7.6 Hz, 1H), 6.92 (s, 1H), 6.83 (dd, *J* = 8.3, 2.1 Hz, 1H), 5.80 (ddt, *J* = 17.0, 9.9, 7.2 Hz, 1H), 5.23-4.99 (m, 2H), 3.77 (s, 3H), 3.21 (d, *J* = 7.1 Hz, 2H), 3.00-2.54 (m, 4H).

**<sup>13</sup>C NMR** (100 MHz, CDCl<sub>3</sub>) δ 159.2, 134.2, 129.2, 124.5, 124.1, 117.3, 116.4, 114.4, 88.1, 81.4, 55.2, 34.8, 29.5, 20.8.

HRMS: *m/z* (ESI) calculated for C<sub>14</sub>H<sub>16</sub>OS (M+IPrAu)<sup>+</sup>: 817.3461, found 817.3438.

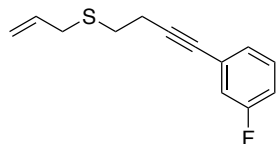

**6i**

allyl(4-(3-fluorophenyl)but-3-yn-1-yl)sulfane (**6i**)

This compound was prepared following general procedure **2.6**, and crude mixture was purified using flash chromatography (40:1 hexane/EtOAc) to yield the desired product as pale yellow oil (57%).

**<sup>1</sup>H NMR** (400 MHz, CDCl<sub>3</sub>) δ 7.38 (td, *J* = 7.8, 1.6 Hz, 1H), 7.27-7.19 (m, 1H), 7.08-6.90 (m, 2H), 5.80 (ddt, *J* = 17.0, 9.9, 7.2 Hz, 1H), 5.22-4.97 (m, 2H), 3.22 (d, *J* = 7.1 Hz, 2H), 2.72 (s, 4H).

**<sup>13</sup>C NMR** (100 MHz, CDCl<sub>3</sub>) δ 162.8 (d, *J* = 250.5 Hz), 134.2, 133.6, 129.4 (d, *J* = 7.7 Hz), 123.8 (d, *J* = 3.2 Hz), 117.3, 115.3 (d, *J* = 21.0 Hz), 112.0 (d, *J* = 16.1 Hz), 93.6, 74.8, 34.9, 29.4, 21.0.

**<sup>19</sup>F NMR** (376 MHz, CDCl<sub>3</sub>) δ -110.8 (m, 1F).

HRMS: *m/z* (ESI) calculated for C<sub>13</sub>H<sub>13</sub>FS (M+IPrAu)<sup>+</sup>: 805.3261, found 805.3239.

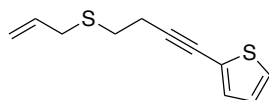

**6j**

2-(4-(allylthio)but-1-yn-1-yl)thiophene (**6j**)

This compound was prepared following general procedure **2.6**, and crude mixture was purified using flash chromatography (40:1 hexane/EtOAc) to yield the desired product as pale yellow oil (46%).

**<sup>1</sup>H NMR** (400 MHz, CDCl<sub>3</sub>) δ 7.22-7.00 (m, 2H), 6.92 (dd, *J* = 5.1, 3.7 Hz, 1H), 5.79 (ddt, *J* = 17.1, 9.9, 7.2 Hz, 1H), 5.19-5.03 (m, 2H), 3.20 (d, *J* = 7.2 Hz, 2H), 2.68 (s, 4H).

**<sup>13</sup>C NMR** (100 MHz, CDCl<sub>3</sub>) δ 134.1, 131.3, 126.8, 126.3, 123.6, 117.3, 92.3, 74.7, 34.9, 29.3, 21.0.

HRMS: *m/z* (ESI) calculated for C<sub>11</sub>H<sub>12</sub>S<sub>2</sub> (M+IPrAu)<sup>+</sup>: 793.2919, found 793.2896.

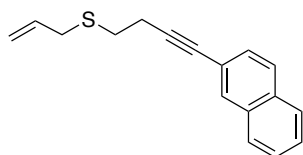

**6k**

allyl(4-(naphthalen-2-yl)but-3-yn-1-yl)sulfane (**6k**)

This compound was prepared following general procedure **2.6**, and crude mixture was purified using flash chromatography (40:1 hexane/EtOAc) to yield the desired product as pale yellow oil (74%).

**<sup>1</sup>H NMR** (400 MHz, CDCl<sub>3</sub>) δ 7.92 (s, 1H), 7.87-7.65 (m, 3H), 7.65-7.36 (m, 3H), 5.83 (ddt, *J* = 17.1, 9.9, 7.2 Hz, 1H), 5.26-5.03 (m, 2H), 3.24 (d, *J* = 7.1 Hz, 2H), 2.74 (h, *J* = 6.7 Hz, 4H).

**<sup>13</sup>C NMR** (100 MHz, CDCl<sub>3</sub>) δ 134.2, 133.0, 132.6, 131.2, 128.6, 127.8, 127.7, 127.6, 126.4, 120.8, 117.3, 88.6, 81.8, 34.9, 29.6, 20.9.

HRMS: *m/z* (ESI) calculated for C<sub>17</sub>H<sub>16</sub>S (M+IPrAu)<sup>+</sup>: 837.3512, found 837.3489.

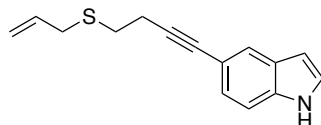

**6l**

#### 5-(4-(allylthio)but-1-yn-1-yl)-1H-indole (**6l**)

This compound was prepared following general procedure **2.6**, and crude mixture was purified using flash chromatography (3:1 hexane/EtOAc) to yield the desired product as brown oil (75%).

**<sup>1</sup>H NMR** (400 MHz, CDCl<sub>3</sub>) δ 8.16 (s, 1H), 7.72 (s, 1H), 7.23 (ddd, *J* = 18.8, 17.7, 5.3 Hz, 3H), 6.50 (s, 1H), 5.82 (ddt, *J* = 17.0, 9.9, 7.2 Hz, 1H), 5.15 (dd, *J* = 21.4, 5.6 Hz, 2H), 3.24 (d, *J* = 7.2 Hz, 2H), 2.83-2.58 (m, 4H).

**<sup>13</sup>C NMR** (100 MHz, CDCl<sub>3</sub>) δ 135.2, 134.3, 127.7, 125.6, 124.9, 124.4, 117.3, 114.6, 110.9, 102.7, 85.5, 82.7, 34.9, 29.8, 20.9.

HRMS: *m/z* (ESI) calculated for C<sub>15</sub>H<sub>15</sub>NS (M+IPrAu)<sup>+</sup>: 826.3464, found 826.3436.

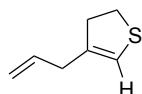

**7a**

#### 4-allyl-2,3-dihydrothiophene (**7a**)

This compound was prepared following general procedure **2.7**, and crude mixture was purified using flash chromatography (pure hexane) to yield the desired product as colorless oil (88%).

*Cation: this product is volatile. Careful rot-vap and vacuum is required.*

**<sup>1</sup>H NMR** (400 MHz; CDCl<sub>3</sub>): δ 5.86-5.74 (m, 2H), 5.10-5.03 (m, 2H), 3.23 (t, *J* = 8.7 Hz, 2H), 2.85 (d, *J* = 6.7 Hz, 2H), 2.68-2.63 (m, 2H).

**<sup>13</sup>C NMR** (100 MHz; CDCl<sub>3</sub>): δ 135.4, 135.2, 118.5, 116.2, 37.9, 35.9, 32.1.

HRMS: *m/z* (ESI) calculated for C<sub>7</sub>H<sub>10</sub>S (M+IPrAu)<sup>+</sup>: 711.3042, found 711.3034.

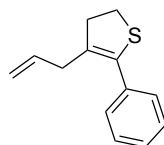

**7b**

#### 4-allyl-5-phenyl-2,3-dihydrothiophene (**7b**)

This compound was prepared following general procedure **2.7**, and crude mixture was purified using flash chromatography (pure hexane) to yield the desired product as colorless oil (93%).

**<sup>1</sup>H NMR** (400 MHz; CDCl<sub>3</sub>): δ 7.37-7.30 (m, 4H), 7.28-7.24 (m, 1H), 5.81 (ddt, *J* = 17.1, 10.1, 6.2 Hz, 1H), 5.12-5.04 (m, 2H), 3.24(t, *J* = 8.8 Hz, 2H), 2.96-2.90 (m, 4H).

**<sup>13</sup>C NMR** (100 MHz; CDCl<sub>3</sub>): δ 135.8, 135.0, 133.7, 128.7, 128.43, 128.24, 127.7, 115.9, 40.8, 34.3, 30.5.

HRMS: *m/z* (ESI) calculated for C<sub>13</sub>H<sub>14</sub>S (M+IPrAu)<sup>+</sup>: 787.3355, found 787.3349.

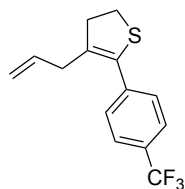

**7c**

4-allyl-5-(4-(trifluoromethyl)phenyl)-2,3-dihydrothiophene (**7c**)

This compound was prepared following general procedure **2.7**, and crude mixture was purified using flash chromatography (pure hexane) to yield the desired product as colorless oil (80%).

**<sup>1</sup>H NMR** (400 MHz; CDCl<sub>3</sub>): δ 7.57 (d, *J* = 8.2 Hz, 2H), 7.45 (d, *J* = 8.1 Hz, 2H), 5.84-5.74 (m, 1H), 5.11-5.05 (m, 2H), 3.26 (t, *J* = 8.6 Hz, 2H), 2.95 (t, *J* = 8.6 Hz, 2H), 2.88 (d, *J* = 6.1 Hz, 2H).

**<sup>13</sup>C NMR** (100 MHz; CDCl<sub>3</sub>): δ 138.7, 135.2, 132.6, 130.6, 129.9 (q, *J* = 32.3 Hz), 128.7, 124.0 (q, *J* = 270.5 Hz), 125.2 (q, *J* = 3.7 Hz), 116.2, 40.9, 34.1, 30.6.

**<sup>19</sup>F NMR** (376 MHz, CDCl<sub>3</sub>) δ -62.7 (s, 3F).

HRMS: *m/z* (ESI) calculated for C<sub>14</sub>H<sub>13</sub>F<sub>3</sub>S (M+IPrAu)<sup>+</sup>: 855.3229, found 855.3220.

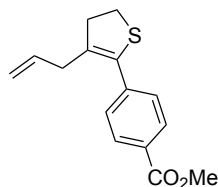

**7d**

methyl 4-(3-allyl-4,5-dihydrothiophen-2-yl)benzoate (**7d**)

This compound was prepared following general procedure **2.7**, and crude mixture was purified using flash chromatography (20:1 hexane/EtOAc) to yield the desired product as colorless oil (96%).

**<sup>1</sup>H NMR** (400 MHz; CDCl<sub>3</sub>): δ 8.02-7.99 (m, 2H), 7.44-7.41 (m, 2H), 5.86-5.76 (m, 1H), 5.13-5.07 (m, 2H), 3.91 (s, 3H), 3.27(t, *J* = 8.5 Hz, 2H), 2.97 (t, *J* = 8.5 Hz, 2H), 2.92 (d, *J* = 6.2 Hz, 2H).

**<sup>13</sup>C NMR** (100 MHz; CDCl<sub>3</sub>): δ 166.7, 139.7, 135.3, 133.0, 130.6, 129.5, 129.2, 128.4, 116.1, 52.1, 41.0, 34.2, 30.6.

HRMS: *m/z* (ESI) calculated for C<sub>15</sub>H<sub>16</sub>O<sub>2</sub>S (M+IPrAu)<sup>+</sup>: 845.3410, found 845.3400.

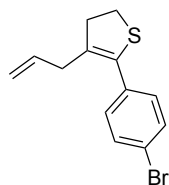

**7e**

4-allyl-5-(4-bromophenyl)-2,3-dihydrothiophene (**7e**)

This compound was prepared following general procedure **2.7**, and crude mixture was purified using flash chromatography (pure hexane) to yield the desired product as colorless oil (90%).

**<sup>1</sup>H NMR** (400 MHz; CDCl<sub>3</sub>): δ 7.45-7.42 (m, 2H), 7.19 (d, *J* = 2.4 Hz, 2H), 5.82-5.73 (m, 1H), 5.09-5.04 (m, 2H), 3.22 (t, *J* = 8.5 Hz, 2H), 2.91 (t, *J* = 8.6 Hz, 2H), 2.86 (d, *J* = 6.1 Hz, 2H).

**<sup>13</sup>C NMR** (100 MHz; CDCl<sub>3</sub>): δ 135.4, 133.9, 132.7, 131.4, 130.1, 129.5, 121.6, 116.0, 40.9, 34.2, 30.5.

HRMS: *m/z* (ESI) calculated for C<sub>13</sub>H<sub>13</sub>BrS (M+IPrAu)<sup>+</sup>: 856.2460, found 856.2450.

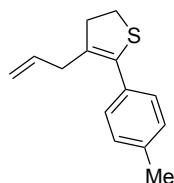

**7f**

4-allyl-5-(*p*-tolyl)-2,3-dihydrothiophene (**7f**)

This compound was prepared following general procedure **2.7**, and crude mixture was purified using flash chromatography (pure hexane) to yield the desired product as colorless oil (91%).

**<sup>1</sup>H NMR** (400 MHz; CDCl<sub>3</sub>): δ 7.26-7.23 (m, 2H), 7.14-7.12 (m, 2H), 5.80 (ddt, *J* = 17.1, 10.1, 6.2 Hz, 1H), 5.11-5.03 (m, 2H), 3.22 (t, *J* = 8.6 Hz, 2H), 2.94-2.90 (m, 4H), 2.33 (s, 3H).

**<sup>13</sup>C NMR** (100 MHz; CDCl<sub>3</sub>): δ 137.5, 135.8, 133.6, 132.0, 128.9, 128.3, 128.1, 115.8, 40.8, 34.3, 30.4, 21.2.

HRMS: *m/z* (ESI) calculated for C<sub>14</sub>H<sub>16</sub>S (M+IPrAu)<sup>+</sup>: 801.3512, found 801.3502.

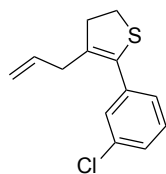

**7g**

4-allyl-5-(3-chlorophenyl)-2,3-dihydrothiophene (**7g**)

This compound was prepared following general procedure **2.7**, and crude mixture was purified using flash chromatography (pure hexane) to yield the desired product as colorless oil (90%).

**<sup>1</sup>H NMR** (400 MHz; CDCl<sub>3</sub>): δ 7.34 (t, *J* = 2.0 Hz, 1H), 7.25-7.20 (m, 3H), 5.84-5.74 (m, 1H), 5.11-5.05 (m, 2H), 3.23 (t, *J* = 8.5 Hz, 2H), 2.95-2.88 (m, 4H).

**<sup>13</sup>C NMR** (100 MHz; CDCl<sub>3</sub>): δ 136.8, 135.3, 134.1, 132.5, 129.9, 129.5, 128.5, 127.8, 126.6, 116.1, 40.8, 34.2, 30.6.

HRMS: *m/z* (ESI) calculated for C<sub>13</sub>H<sub>13</sub>ClS (M+IPrAu)<sup>+</sup>: 821.2965, found 821.2955.

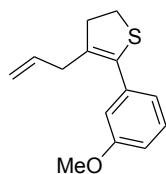

**7h**

4-allyl-5-(3-methoxyphenyl)-2,3-dihydrothiophene (**7h**)

This compound was prepared following general procedure **2.7**, and crude mixture was purified using flash chromatography (20:1 hexane/EtOAc) to yield the desired product as colorless oil (95%).



**<sup>1</sup>H NMR** (400 MHz; CDCl<sub>3</sub>): δ 7.24 (t, *J* = 7.9 Hz, 1H), 6.96-6.91 (m, 2H), 6.82 (ddd, *J* = 8.3, 2.6, 0.9 Hz, 1H), 5.82 (ddt, *J* = 16.9, 10.3, 6.4 Hz, 1H), 5.12-5.05 (m, 2H), 3.79 (s, 3H), 3.24 (t, *J* = 8.6 Hz, 2H), 2.96-2.92 (m, 4H).

**<sup>13</sup>C NMR** (100 MHz; CDCl<sub>3</sub>): δ 159.4, 136.3, 135.8, 133.6, 129.3, 128.8, 120.9, 115.9, 113.73, 113.62, 55.2, 40.8, 34.3, 30.5.

HRMS: *m/z* (ESI) calculated for C<sub>14</sub>H<sub>16</sub>OS (M+IPrAu)<sup>+</sup>: 817.3461, found 817.3450.

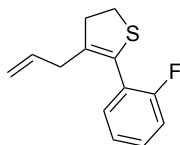

7i

#### 4-allyl-5-(2-fluorophenyl)-2,3-dihydrothiophene (7i)

This compound was prepared following general procedure 2.7, and crude mixture was purified using flash chromatography (pure hexane) to yield the desired product as colorless oil (73%).

**<sup>1</sup>H NMR** (400 MHz; CDCl<sub>3</sub>): δ 7.32-7.23 (m, 2H), 7.11-7.03 (m, 2H), 5.73 (ddt, *J* = 16.9, 10.2, 6.7 Hz, 1H), 5.05-4.98 (m, 2H), 3.28 (t, *J* = 8.6 Hz, 2H), 2.91 (t, *J* = 8.5 Hz, 2H), 2.75 (d, *J* = 6.6 Hz, 2H).

**<sup>13</sup>C NMR** (100 MHz; CDCl<sub>3</sub>): δ 159.6 (d, *J* = 246.8 Hz), 135.4, 132.1, 131.3 (d, *J* = 3.2 Hz), 129.6, 126.7 (d, *J* = 8.1 Hz), 123.9 (d, *J* = 3.5 Hz), 122.6 (d, *J* = 15.8 Hz), 116.08, 115.8 (d, *J* = 22.2 Hz), 39.8, 34.6, 31.2.

**<sup>19</sup>F NMR** (376 MHz, CDCl<sub>3</sub>) δ -112.8 (dt, *J* = 9.0, 6.6 Hz, 1F).

HRMS: *m/z* (ESI) calculated for C<sub>13</sub>H<sub>13</sub>FS (M+IPrAu)<sup>+</sup>: 805.3261, found 805.3240.

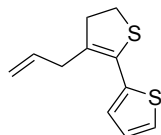

7j

#### 3-allyl-4,5-dihydro-2,2'-bithiophene (7j)

This compound was prepared following general procedure 2.7, and crude mixture was purified using flash chromatography (pure hexane) to yield the desired product as colorless oil (99%).

**<sup>1</sup>H NMR** (400 MHz; CDCl<sub>3</sub>): δ 7.26-7.24 (m, 1H), 7.07 (d, *J* = 3.6 Hz, 1H), 6.99 (ddd, *J* = 3.1, 2.9, 2.2 Hz, 1H), 5.87-5.77 (m, 1H), 5.13-5.05 (m, 2H), 3.22 (t, *J* = 8.4 Hz, 2H), 3.14-3.13 (d, *J* = 6.0 Hz, 2H), 2.95 (t, *J* = 8.4 Hz, 2H).

**<sup>13</sup>C NMR** (100 MHz; CDCl<sub>3</sub>): δ 136.3, 134.8, 129.7, 126.9, 126.8, 126.6, 125.4, 116.1, 41.5, 34.7, 30.5.

HRMS: *m/z* (ESI) calculated for C<sub>11</sub>H<sub>12</sub>S<sub>2</sub> (M+IPrAu)<sup>+</sup>: 793.2919, found 793.2916.

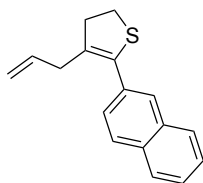

7k

#### 4-allyl-5-(naphthalen-2-yl)-2,3-dihydrothiophene (7k)

This compound was prepared following general procedure **2.7**, and crude mixture was purified using flash chromatography (pure hexane) to yield the desired product as colorless oil (91%).

**<sup>1</sup>H NMR** (400 MHz; CDCl<sub>3</sub>): δ 7.83-7.78 (m, 4H), 7.49-7.43 (m, 3H), 5.84 (ddt, *J* = 16.9, 10.3, 6.4 Hz, 1H), 5.14-5.07 (m, 2H), 3.27 (t, *J* = 8.6 Hz, 2H), 2.99-2.95 (m, 4H).

**<sup>13</sup>C NMR** (100 MHz; CDCl<sub>3</sub>): δ 135.8, 133.8, 133.2, 132.8, 132.5, 129.3, 128.1, 127.9, 127.6, 127.5, 126.5, 126.21, 126.13, 116.0, 40.9, 34.4, 30.7.

HRMS: *m/z* (ESI) calculated for C<sub>17</sub>H<sub>16</sub>S (M+IPrAu)<sup>+</sup>: 837.3512, found 837.3504.

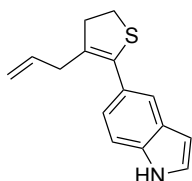

**71**

5-(3-allyl-4,5-dihydrothiophen-2-yl)-1*H*-indole (**71**)

This compound was prepared following general procedure **2.7**, and crude mixture was purified using flash chromatography (3:1 hexane/EtOAc) to yield the desired product as yellow solid (62%).

**<sup>1</sup>H NMR** (400 MHz; CDCl<sub>3</sub>): δ 8.12 (br, 1H), 7.64 (t, *J* = 0.8 Hz, 1H), 7.29-7.27 (m, 1H), 7.20 (dd, *J* = 8.5, 1.7 Hz, 1H), 7.14 (dd, *J* = 3.0, 2.6 Hz, 1H), 6.51 (ddd, *J* = 3.1, 2.1, 1.0 Hz, 1H), 5.83 (ddt, *J* = 16.9, 10.2, 6.5 Hz, 1H), 5.12-5.04 (m, 2H), 3.24 (t, *J* = 8.5 Hz, 2H), 2.95 (m, 4H).

**<sup>13</sup>C NMR** (100 MHz; CDCl<sub>3</sub>): δ 136.2, 135.3, 134.6, 127.7, 127.2, 126.5, 124.8, 122.9, 120.8, 115.7, 110.8, 102.8, 40.7, 34.4, 30.4.

HRMS: *m/z* (ESI) calculated for C<sub>15</sub>H<sub>15</sub>NS (M+IPrAu)<sup>+</sup>: 826.3464, found 826.3444.

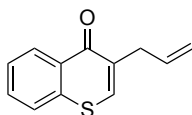

**8**

3-allyl-4*H*-thiochromen-4-one (**8**)

This compound was prepared following general procedure **2.8**, and crude mixture was purified using flash chromatography (pure hexane) to yield the desired product as colorless oil (85%).

**<sup>1</sup>H NMR** (400 MHz; CDCl<sub>3</sub>): δ 8.57-8.55 (dt, *J* = 8.0, 1.2 Hz, 1H), 7.63 (t, *J* = 1.0 Hz, 1H), 7.55 (m, 2H), 7.50 (m, 1H), 6.01-5.91 (m, 1H), 5.21-5.16 (m, 2H), 3.42 (dq, *J* = 6.8, 1.2 Hz, 2H).

**<sup>13</sup>C NMR** (100 MHz; CDCl<sub>3</sub>): δ 178.9, 137.2, 135.2, 134.9, 133.4, 131.5, 130.9, 128.9, 127.4, 126.4, 117.6, 35.7.

HRMS: *m/z* (ESI) calculated for C<sub>12</sub>H<sub>10</sub>OS (M+IPrAu)<sup>+</sup>: 787.2991, found 787.2973.

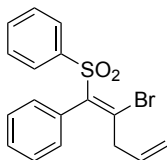

**9**

(*Z*)-(2-bromo-1-(phenylsulfonyl)penta-1,4-dien-1-yl)benzene (**9**)

This compound was prepared following general procedure **2.9**, and crude mixture was purified using flash chromatography (10:1 hexane/EtOAc) to yield the desired product as white solid (86%).

**<sup>1</sup>H NMR** (400 MHz; CDCl<sub>3</sub>): δ 7.83-7.80 (m, 2H), 7.59 (ddt, *J* = 8.0, 6.9, 1.2 Hz, 1H), 7.48-7.44 (m, 2H), 7.39-7.31 (m, 3H), 7.11-7.09 (m, 2H), 5.67 (ddt, *J* = 16.9, 10.2, 6.6 Hz, 1H), 5.10 (dq, *J* = 10.1, 1.3 Hz, 1H), 4.95 (dq, *J* = 17.0, 1.5 Hz, 1H), 3.08 (dt, *J* = 6.5, 1.5 Hz, 2H).

**<sup>13</sup>C NMR** (100 MHz; CDCl<sub>3</sub>): δ 143.8, 140.0, 135.0, 133.5, 133.42, 132.1, 130.1, 129.2, 128.7, 128.6, 128.5, 118.7, 46.0

HRMS: *m/z* (ESI) calculated for C<sub>17</sub>H<sub>15</sub>BrO<sub>2</sub>S (M+H)<sup>+</sup>: 365.0029, found 365.0027.

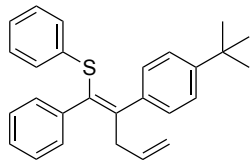

**10**

(*Z*)-2-(2-(4-(*tert*-butyl)phenyl)-1-phenylpenta-1,4-dien-1-yl)(phenyl)sulfane (**10**)

This compound was prepared following general procedure **2.10**, and crude mixture was purified using flash chromatography (pure hexane) to yield the desired product as yellow solid (98%).

**<sup>1</sup>H NMR** (400 MHz; CDCl<sub>3</sub>): δ 7.35 (ddt, *J* = 7.5, 5.6, 1.8 Hz, 4H), 7.31-7.28 (m, 2H), 7.20-7.16 (m, 2H), 7.12-7.08 (m, 3H), 7.05-6.97 (m, 3H), 5.68 (dd, *J* = 16.9, 10.3 Hz, 1H), 4.94-4.88 (m, 2H), 3.15 (dt, *J* = 6.5, 1.4 Hz, 2H), 1.33 (s, 10H).

**<sup>13</sup>C NMR** (100 MHz; CDCl<sub>3</sub>): δ 149.8, 143.5, 139.4, 138.8, 135.6, 135.4, 132.7, 130.9, 129.8, 128.3, 128.2, 127.6, 127.1, 126.0, 124.9, 116.0, 41.2, 34.6, 31.4

HRMS: *m/z* (ESI) calculated for C<sub>27</sub>H<sub>28</sub>S (M+IPrAu)<sup>+</sup>: 969.4459, found 969.4457.

## VII. NMR Spectra

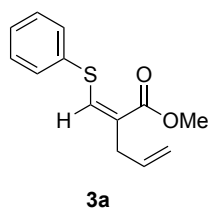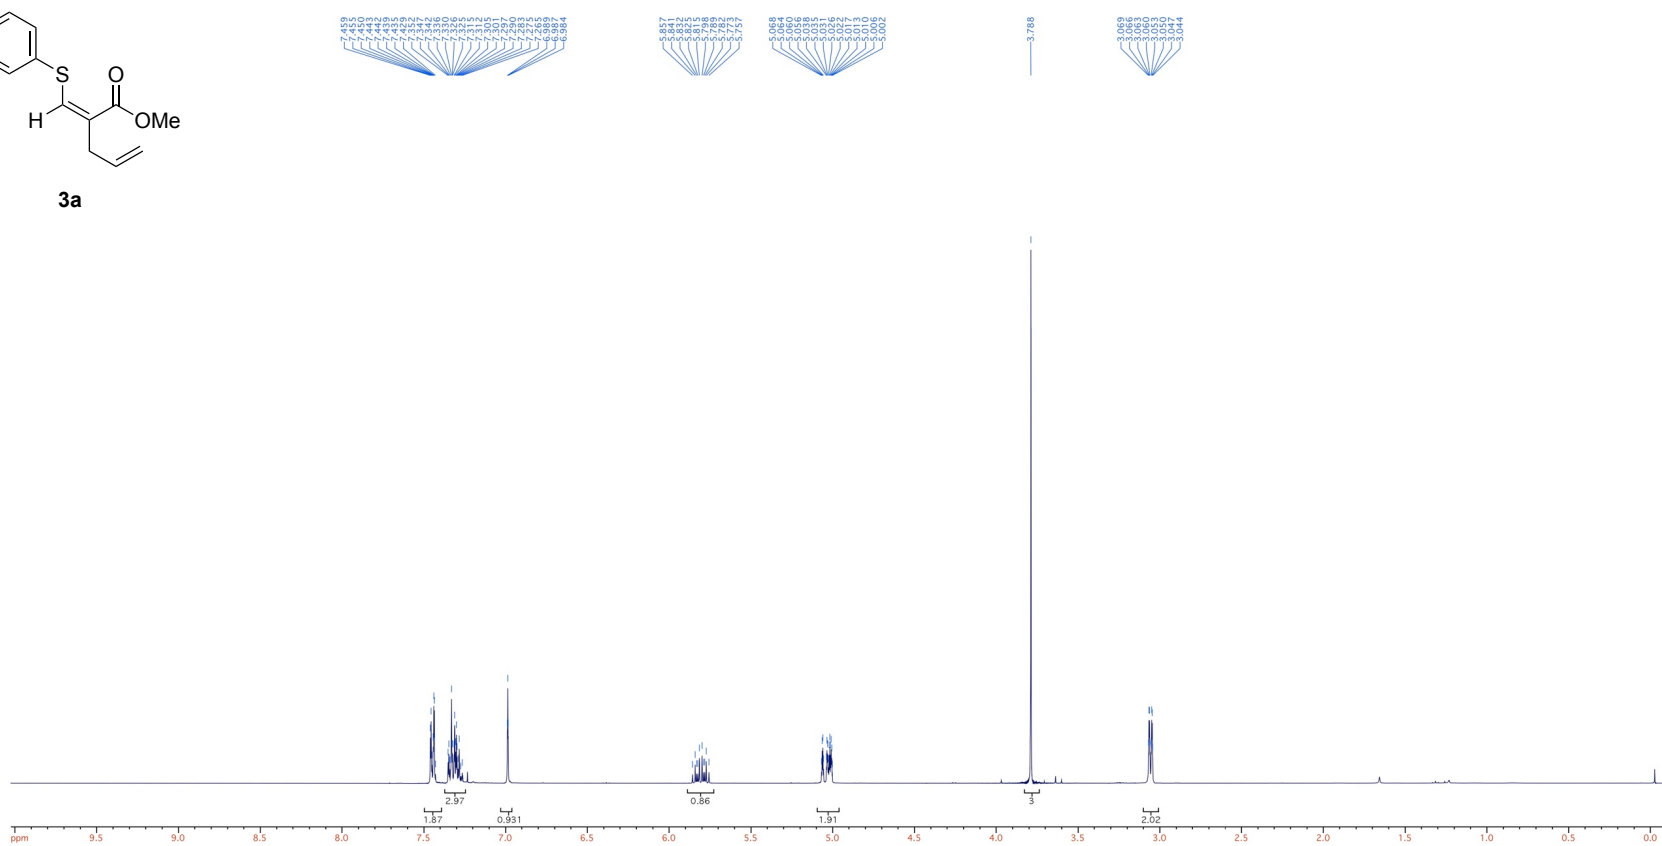

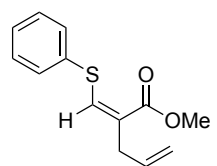

**3a**

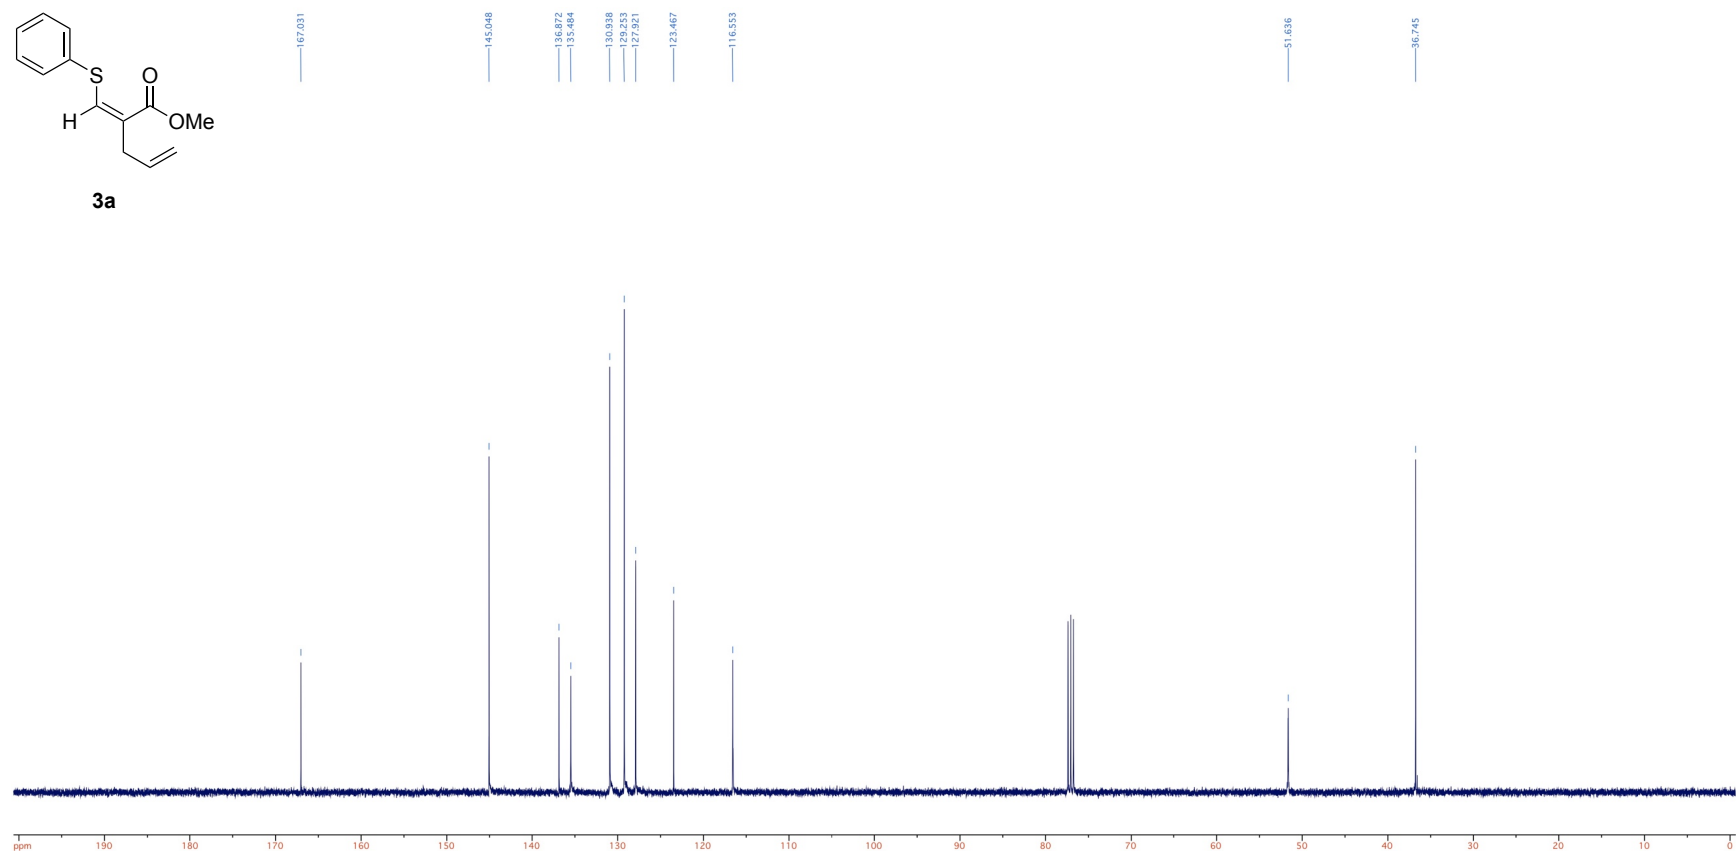

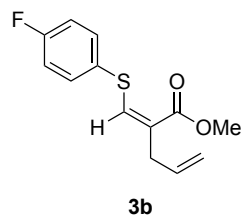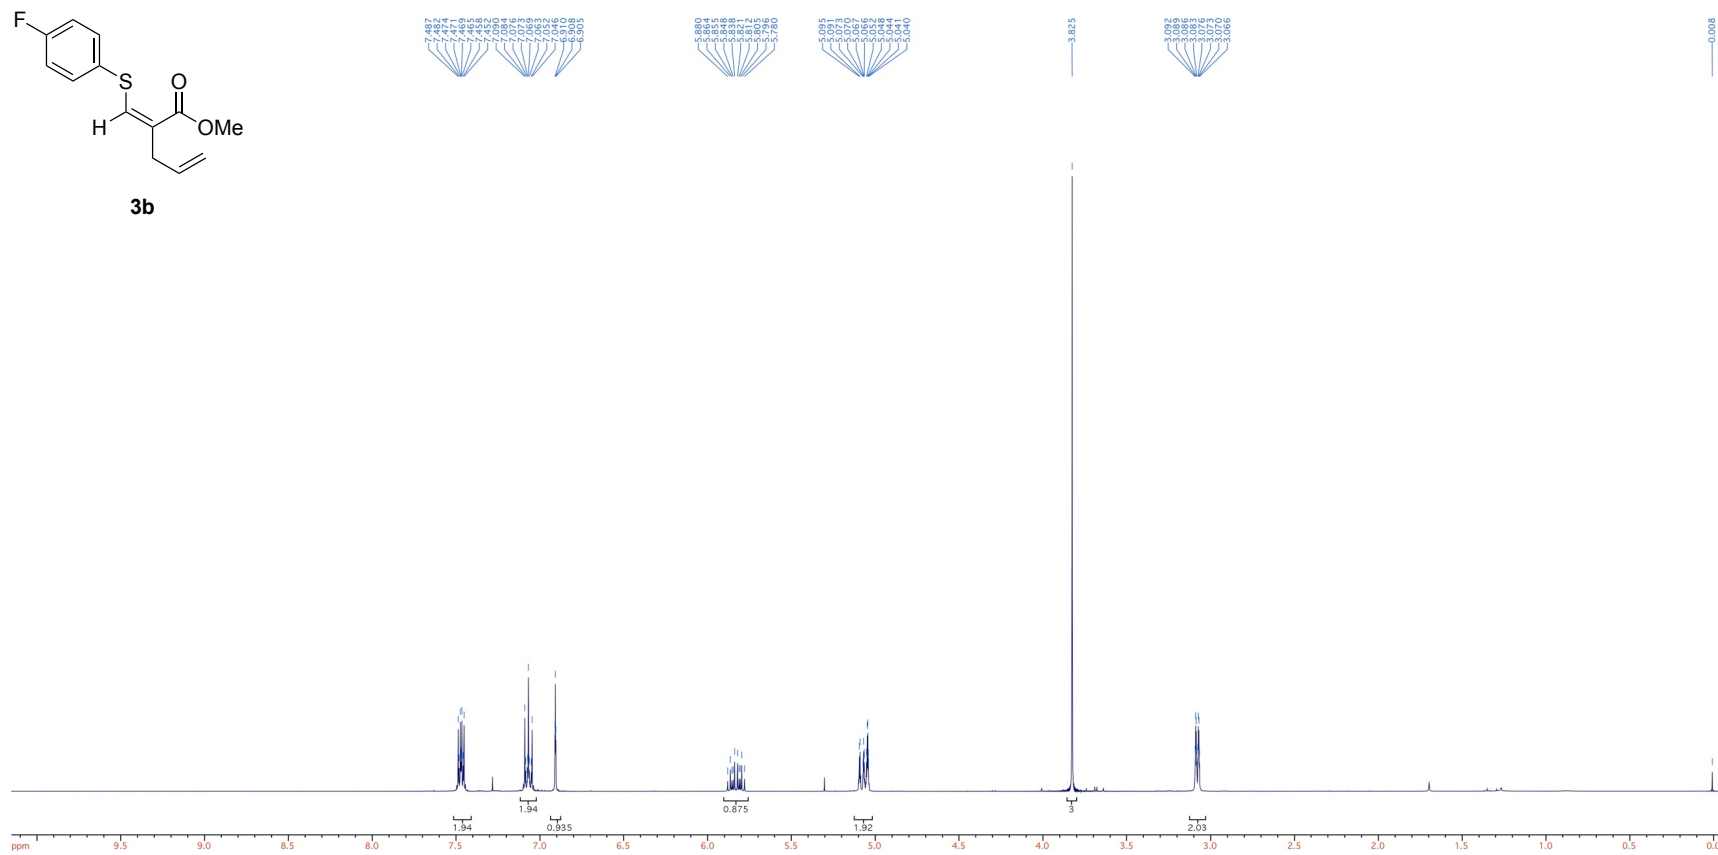

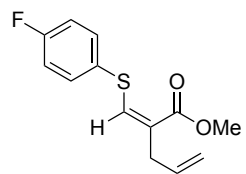

**3b**

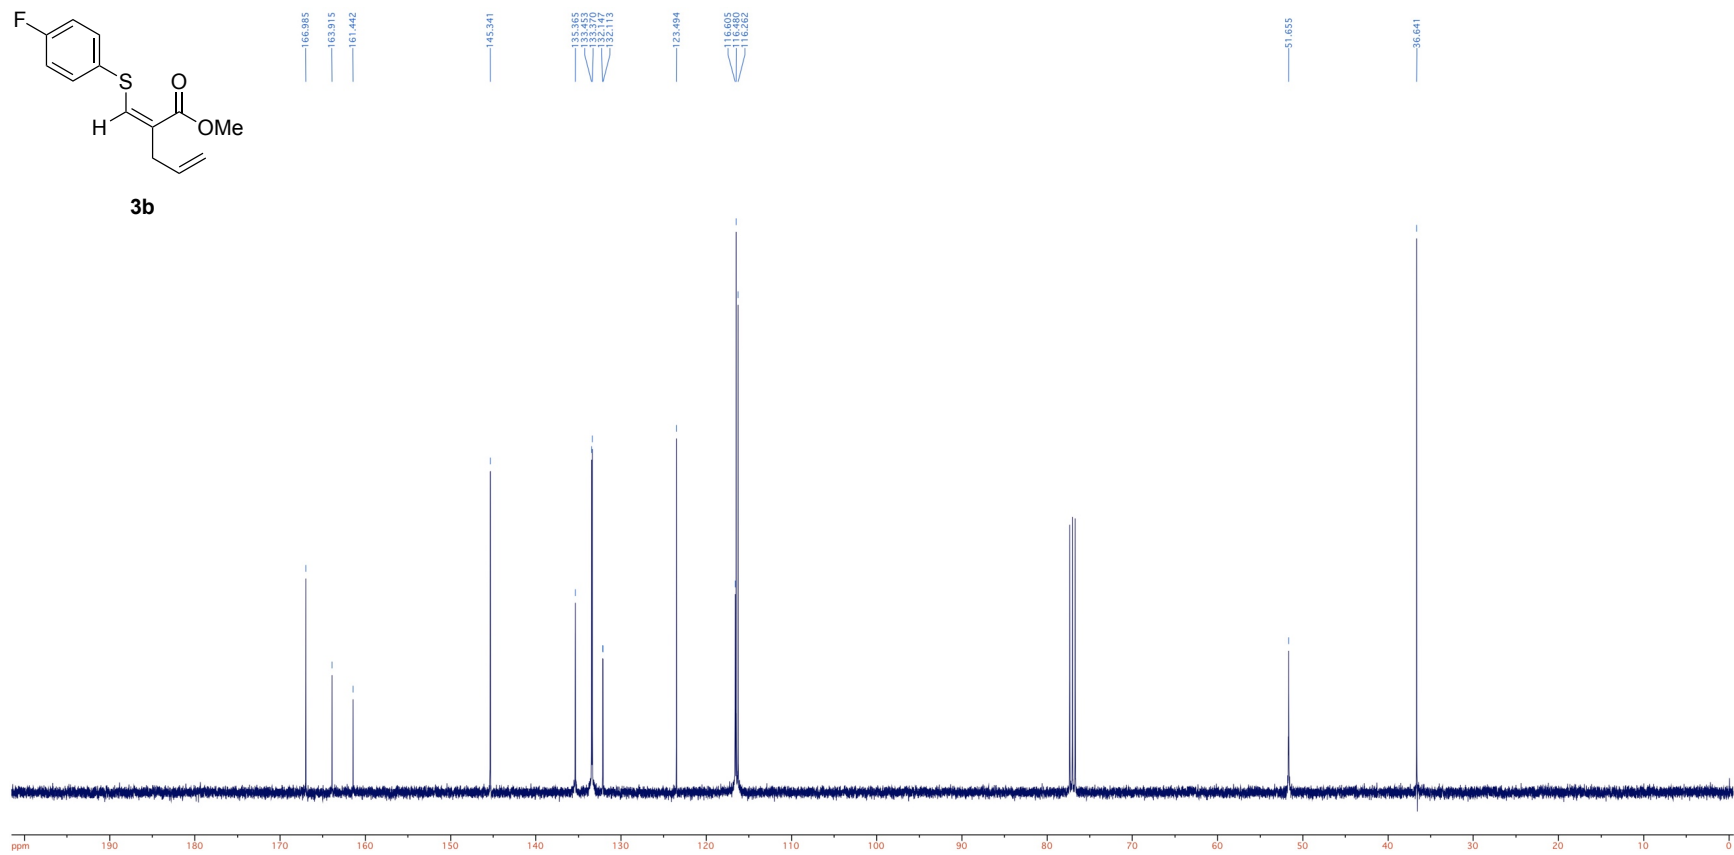

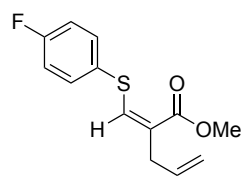

**3b**

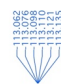

ppm 20 10 -0 -10 -20 -30 -40 -50 -60 -70 -80 -90 -100 -110 -120 -130 -140 -150 -160 -170 -180 -190 -20



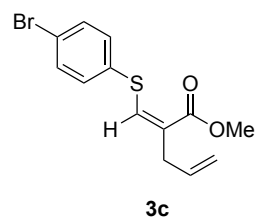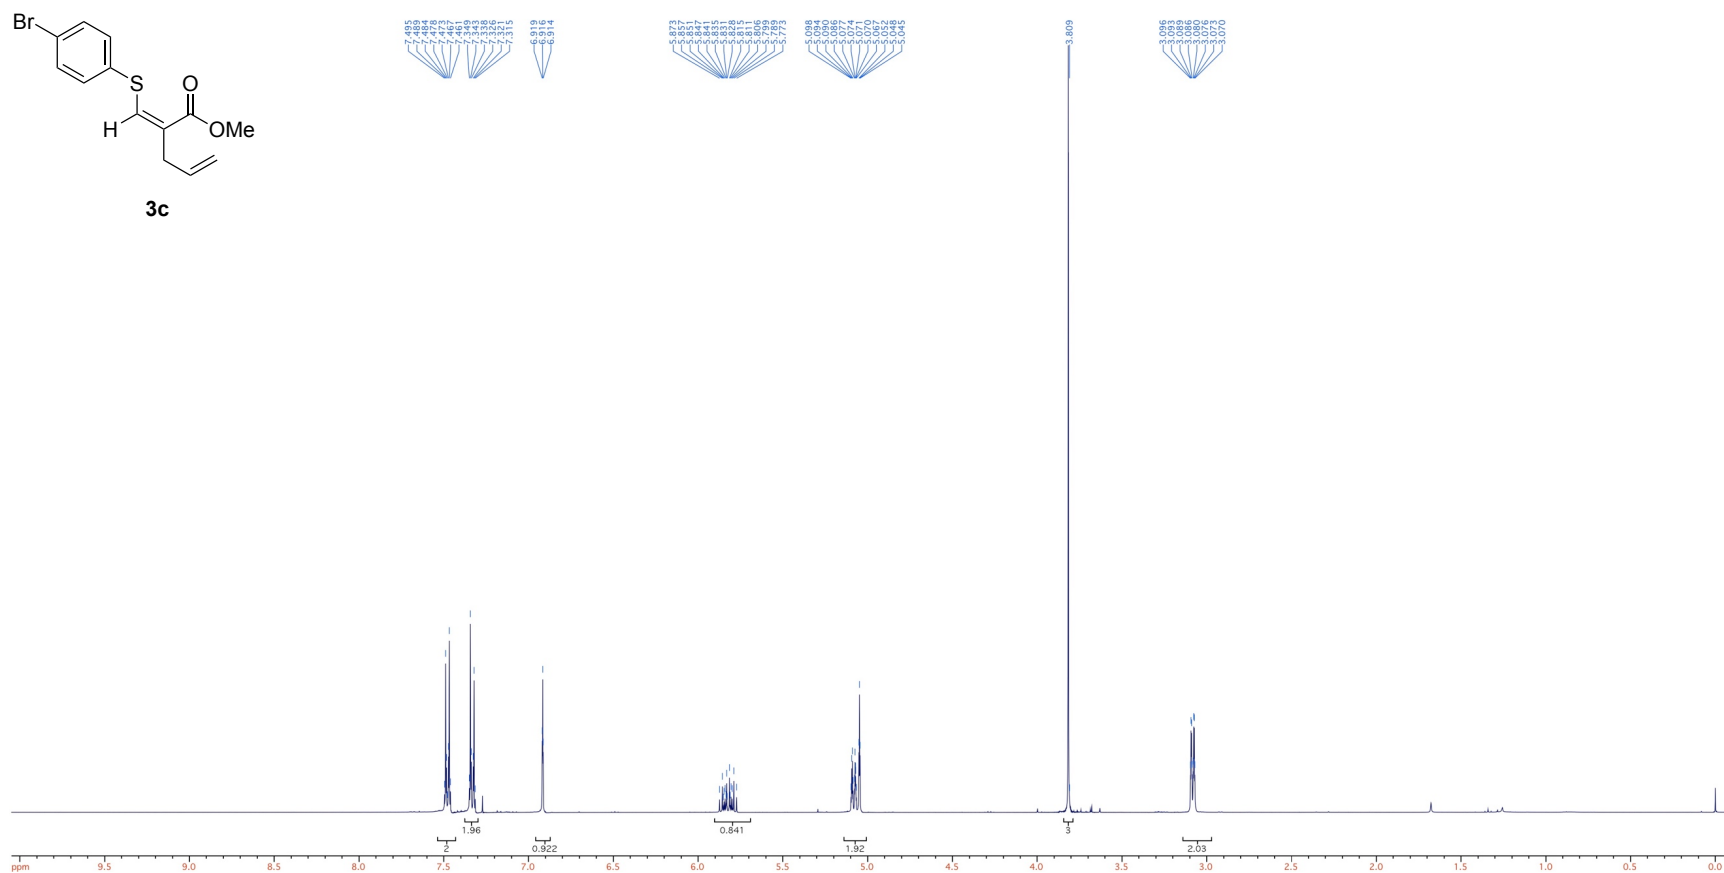

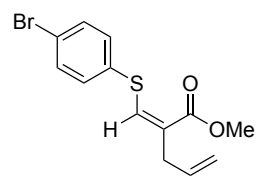

3c

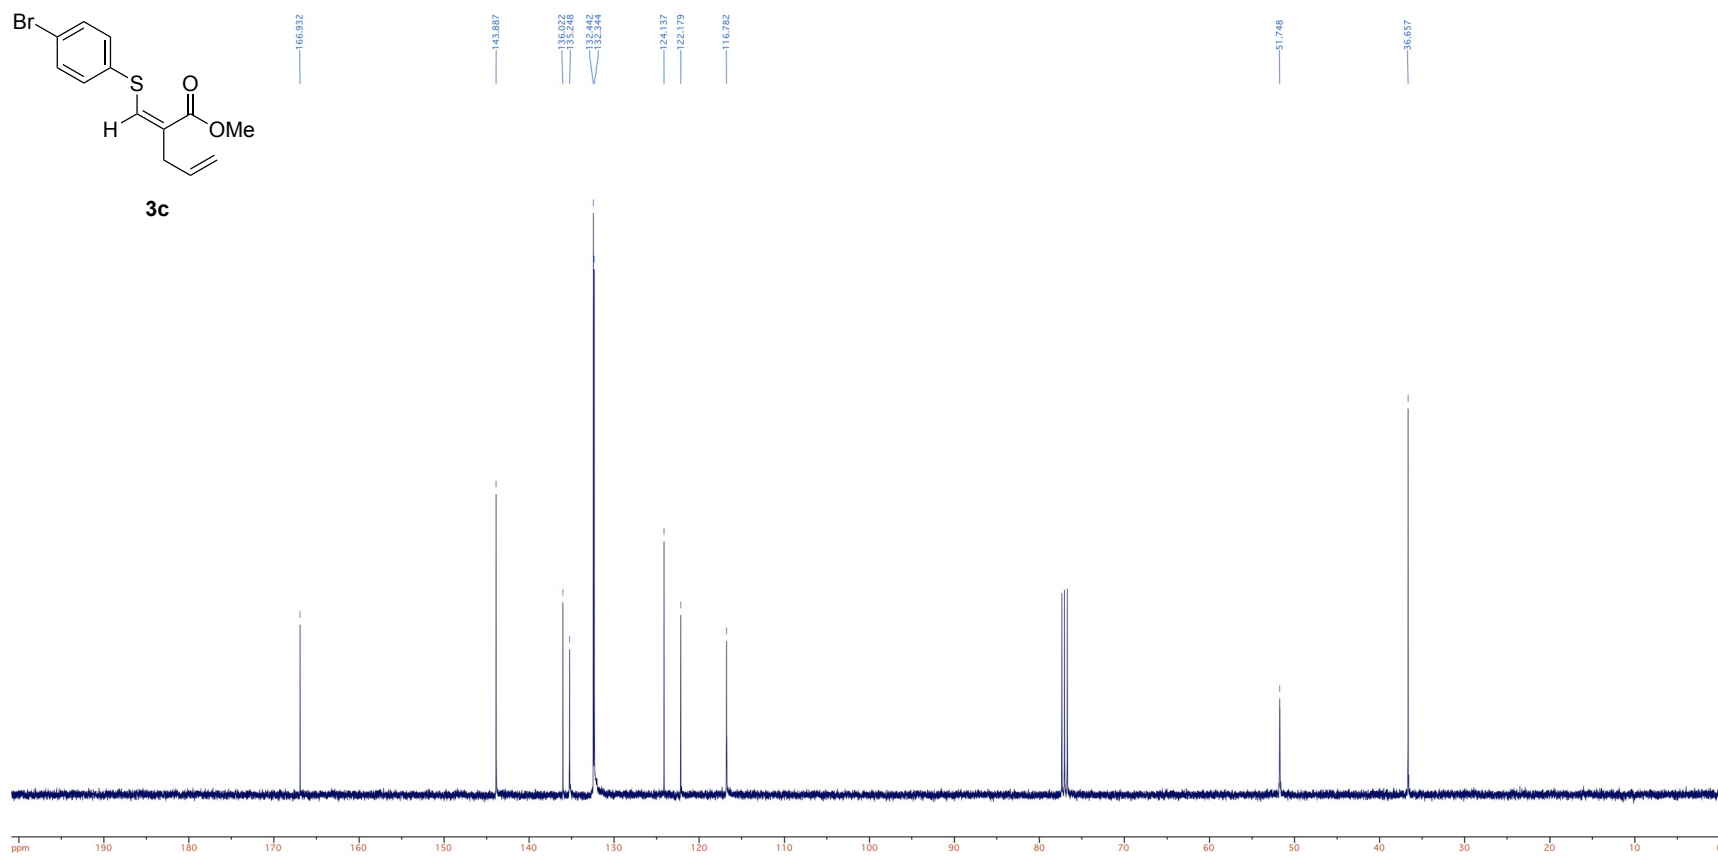

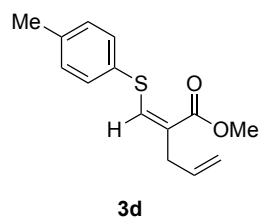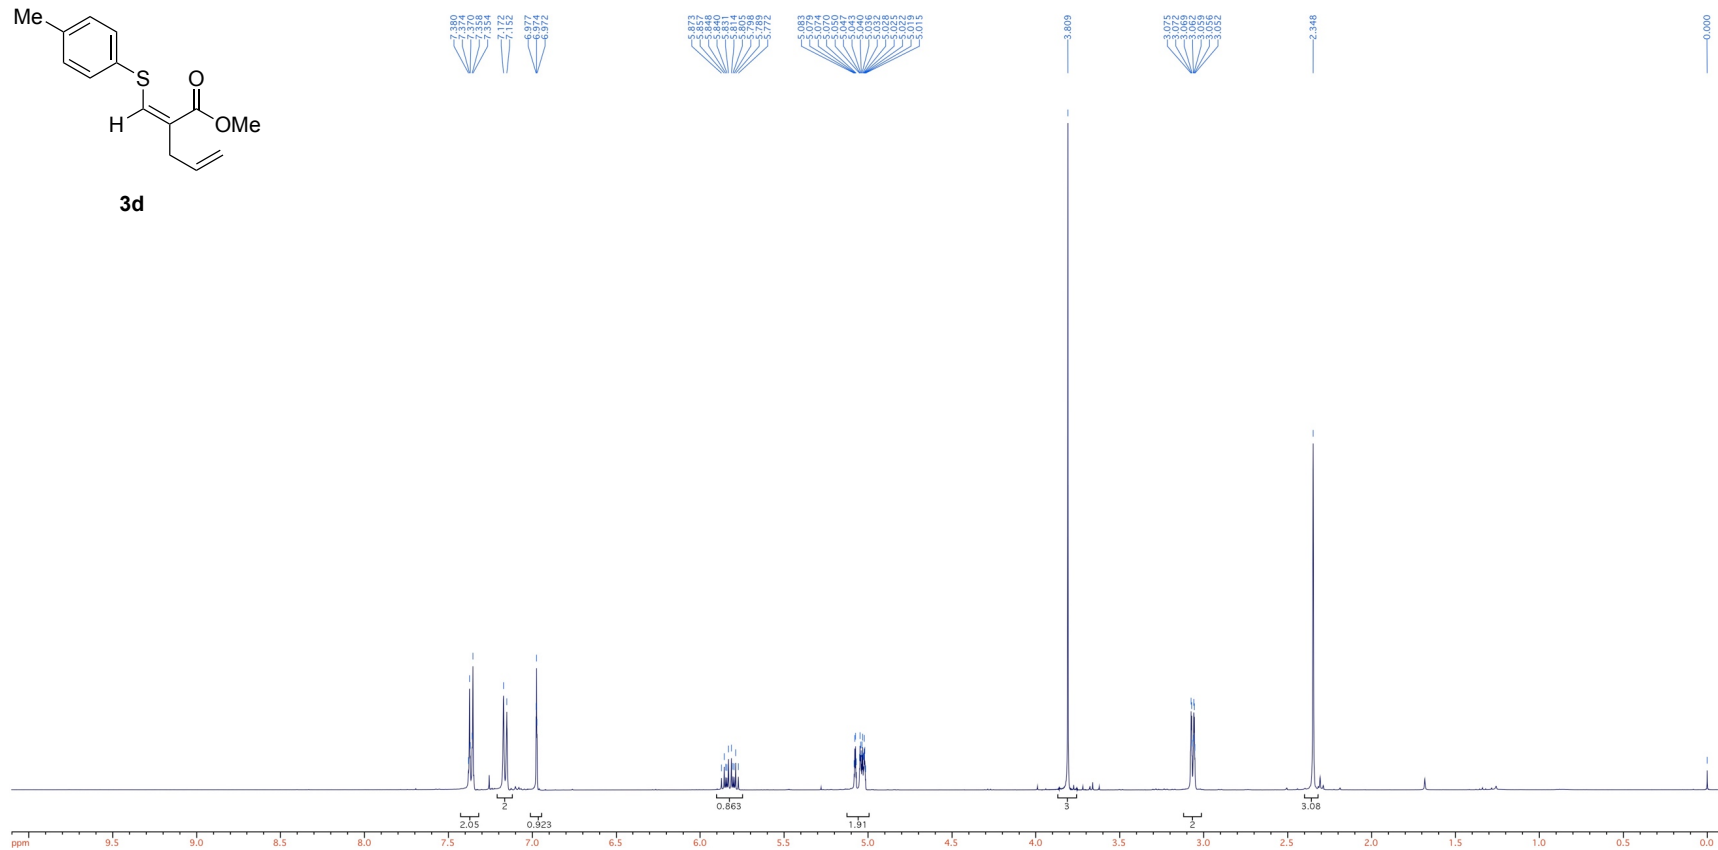

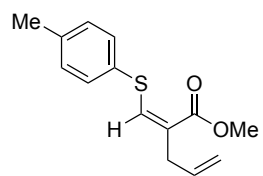

3d

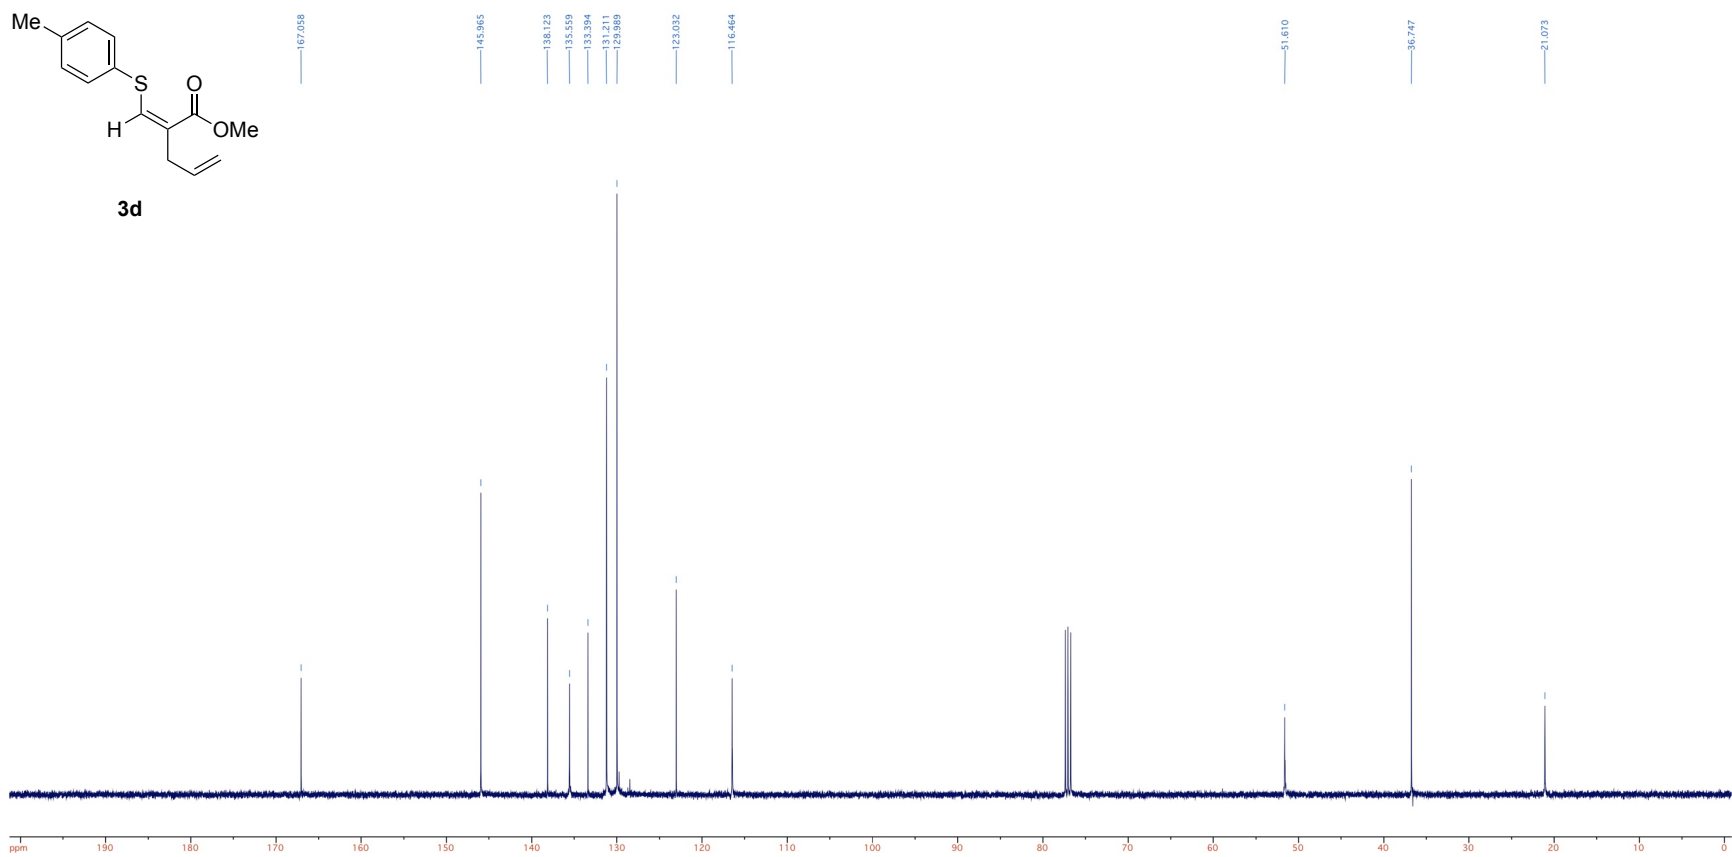

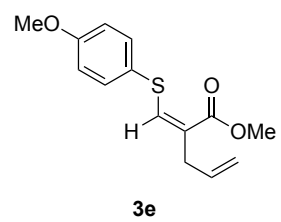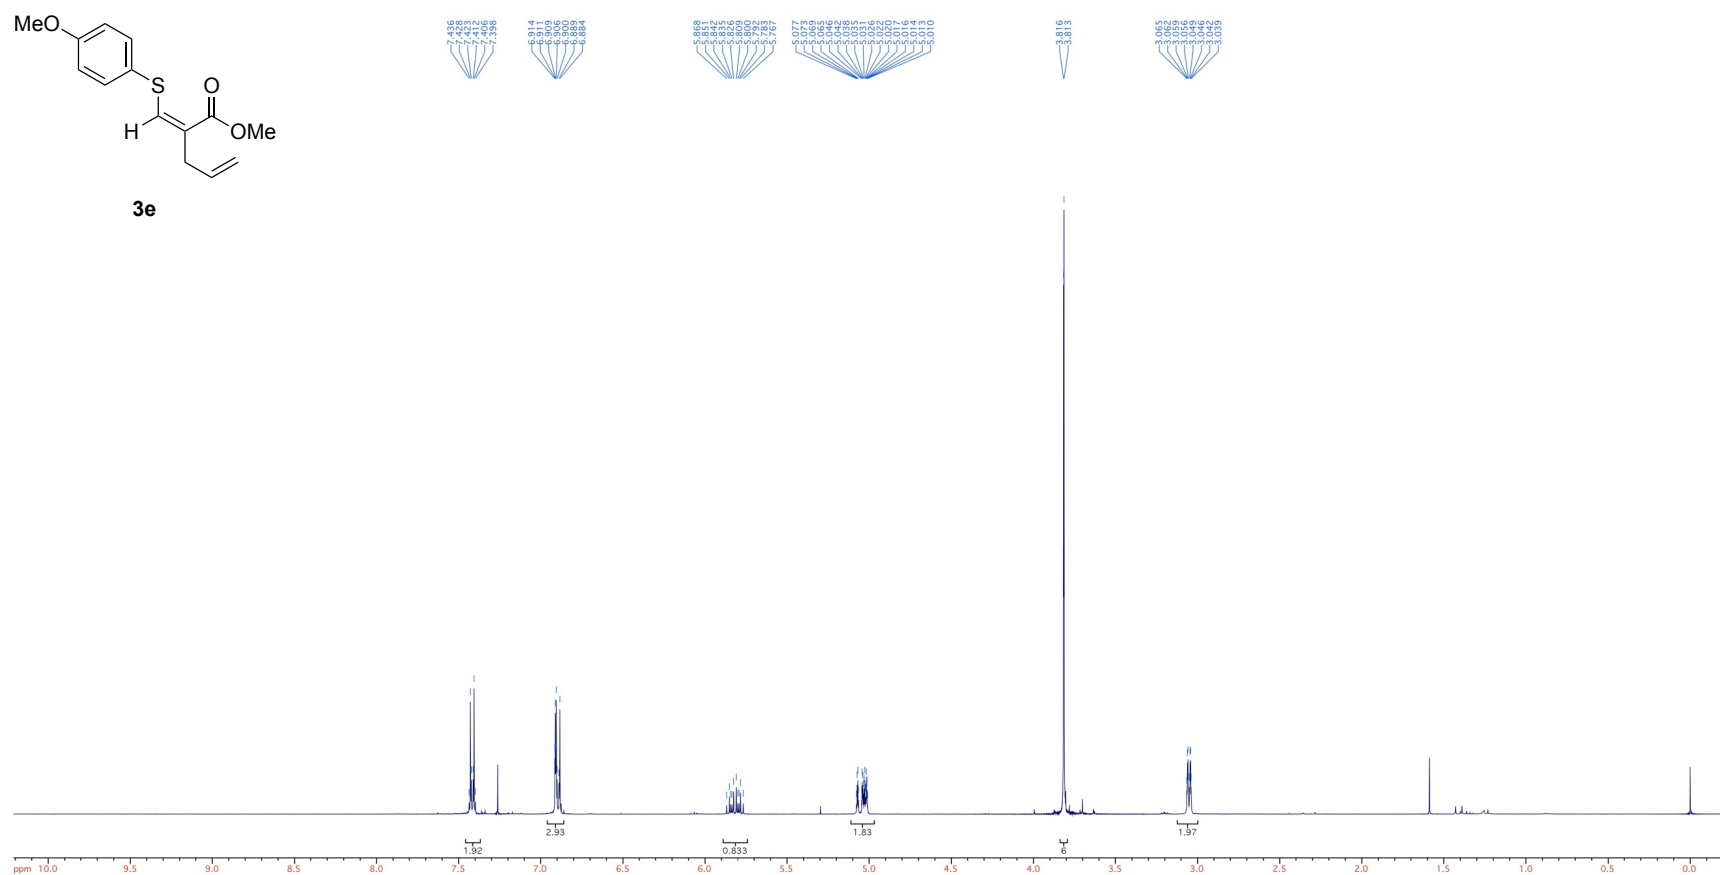

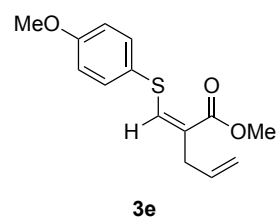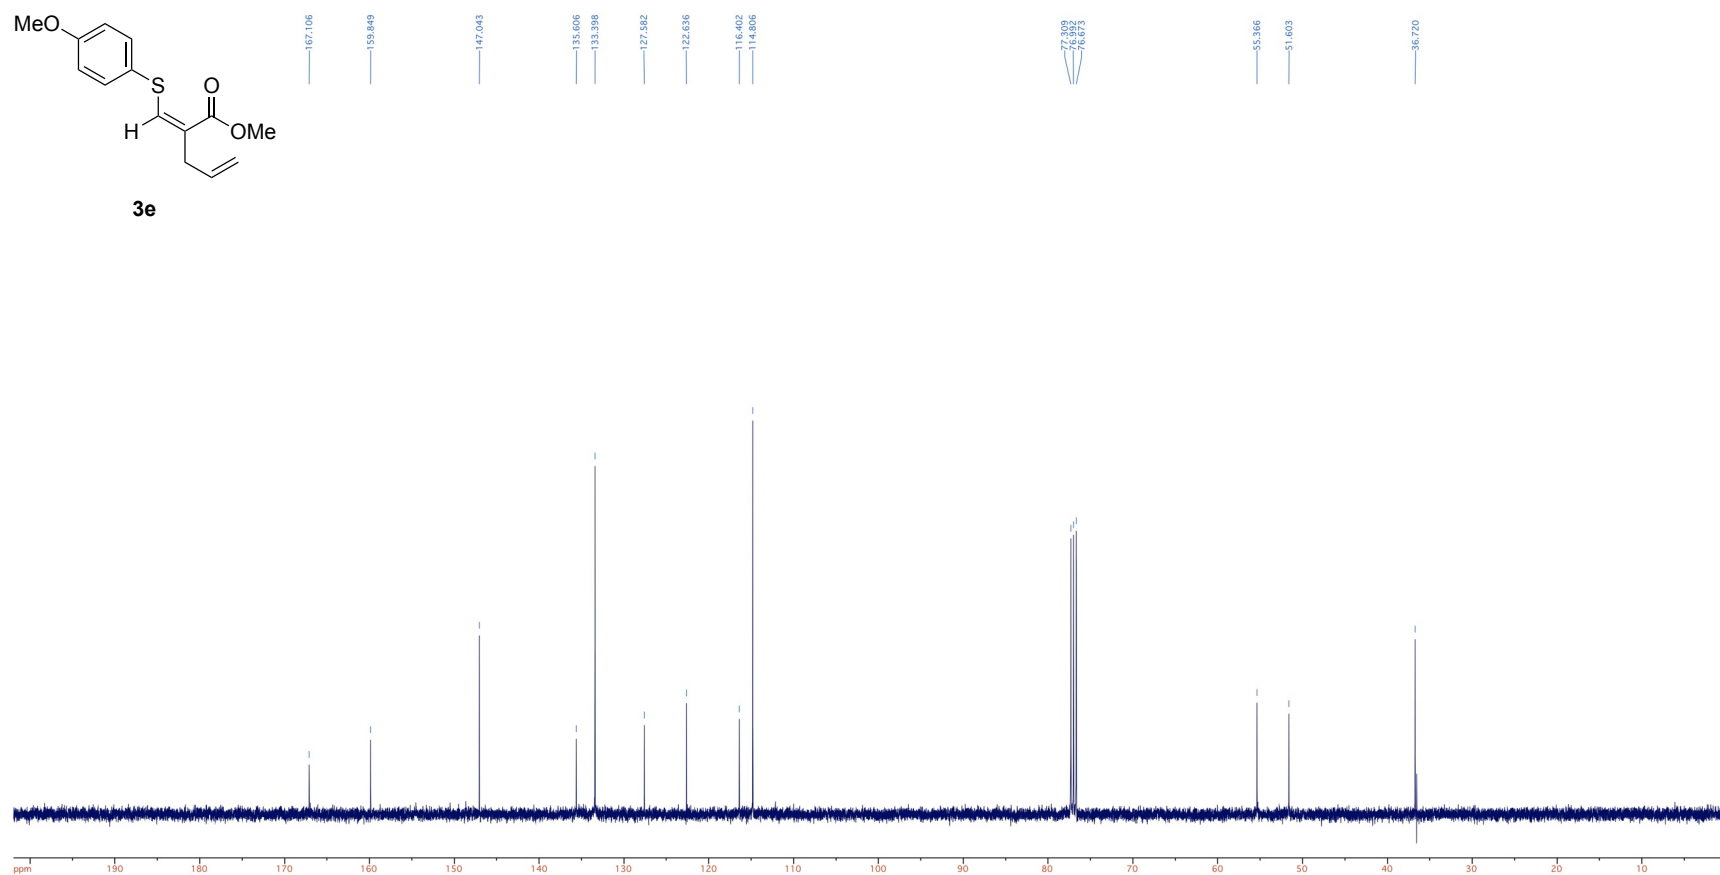

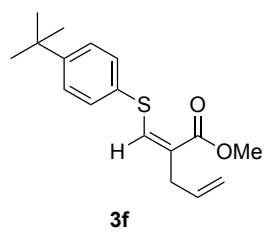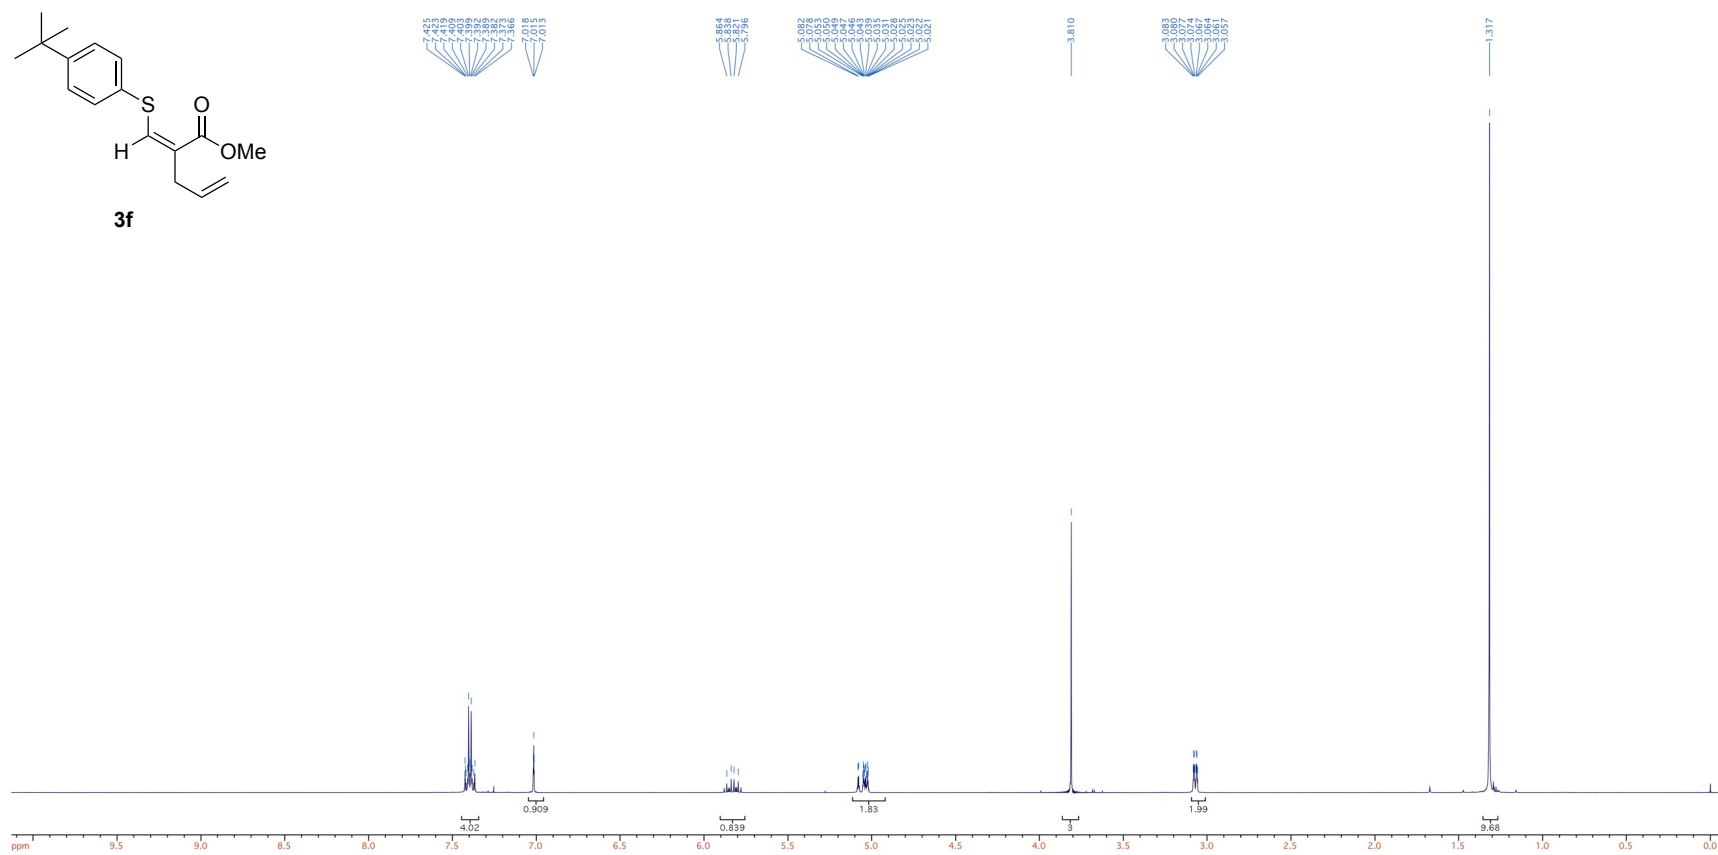

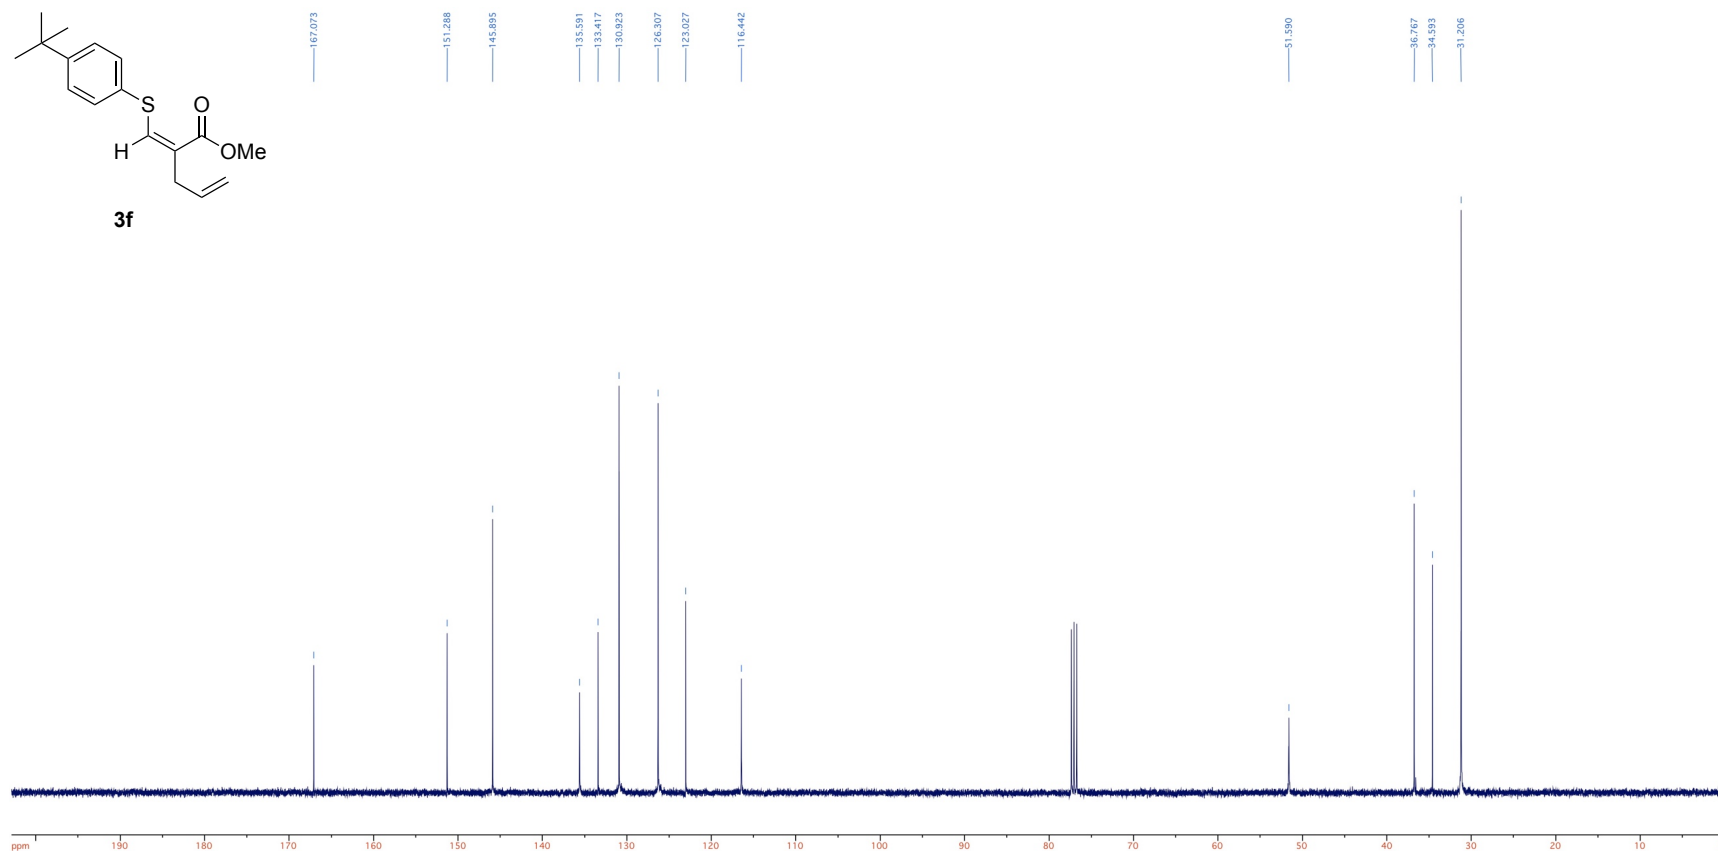



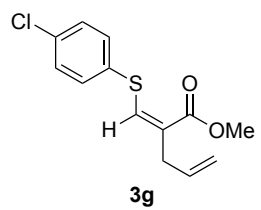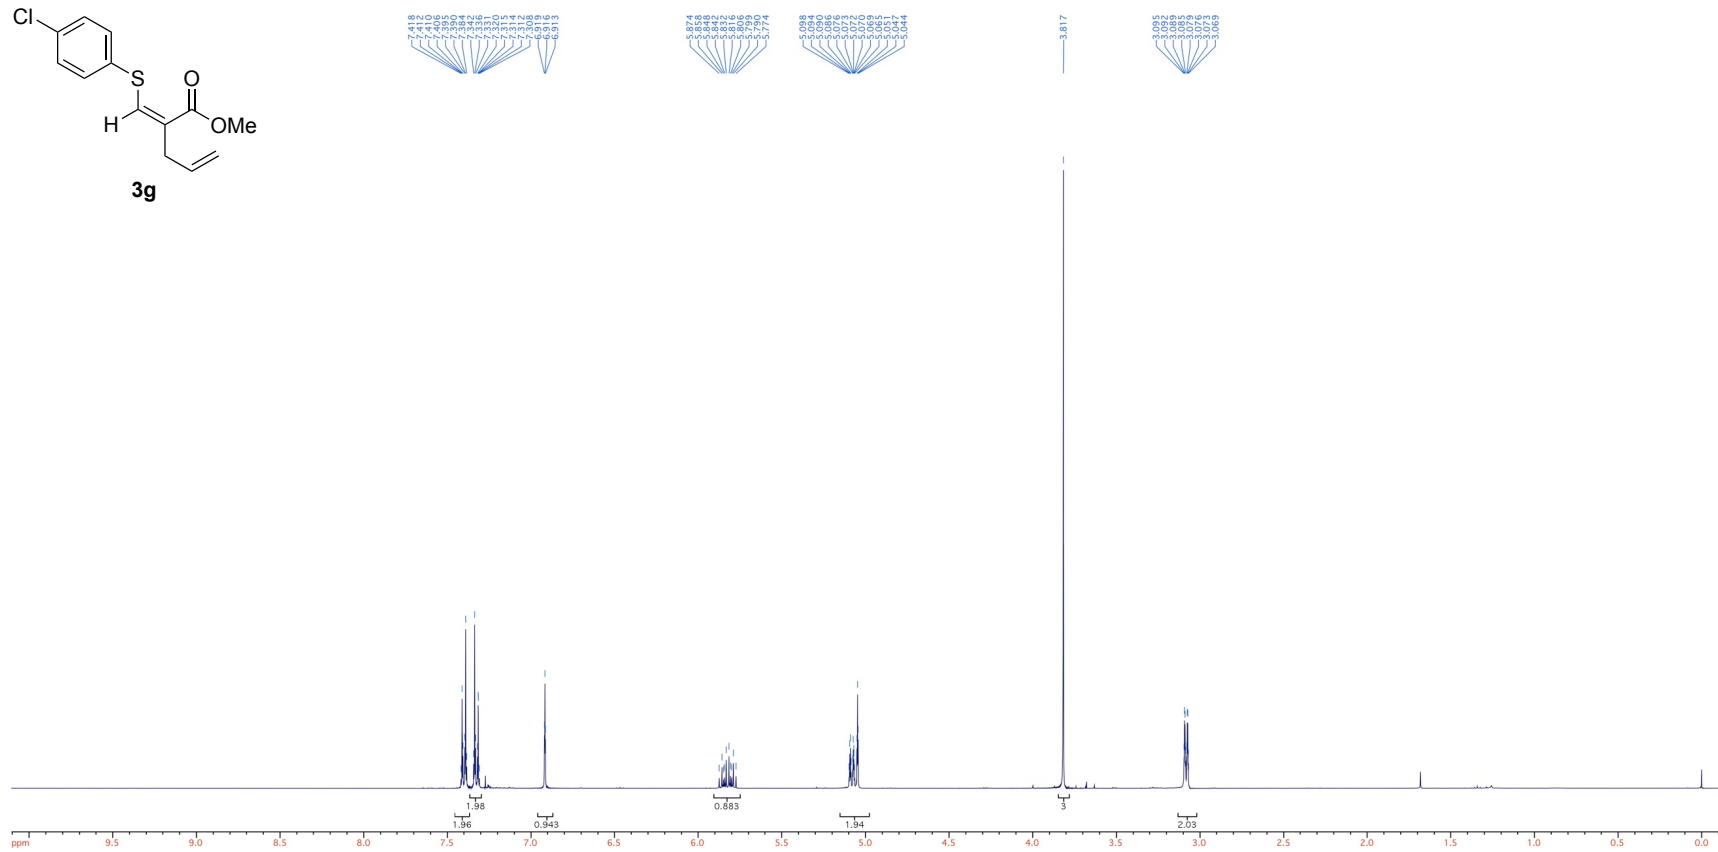

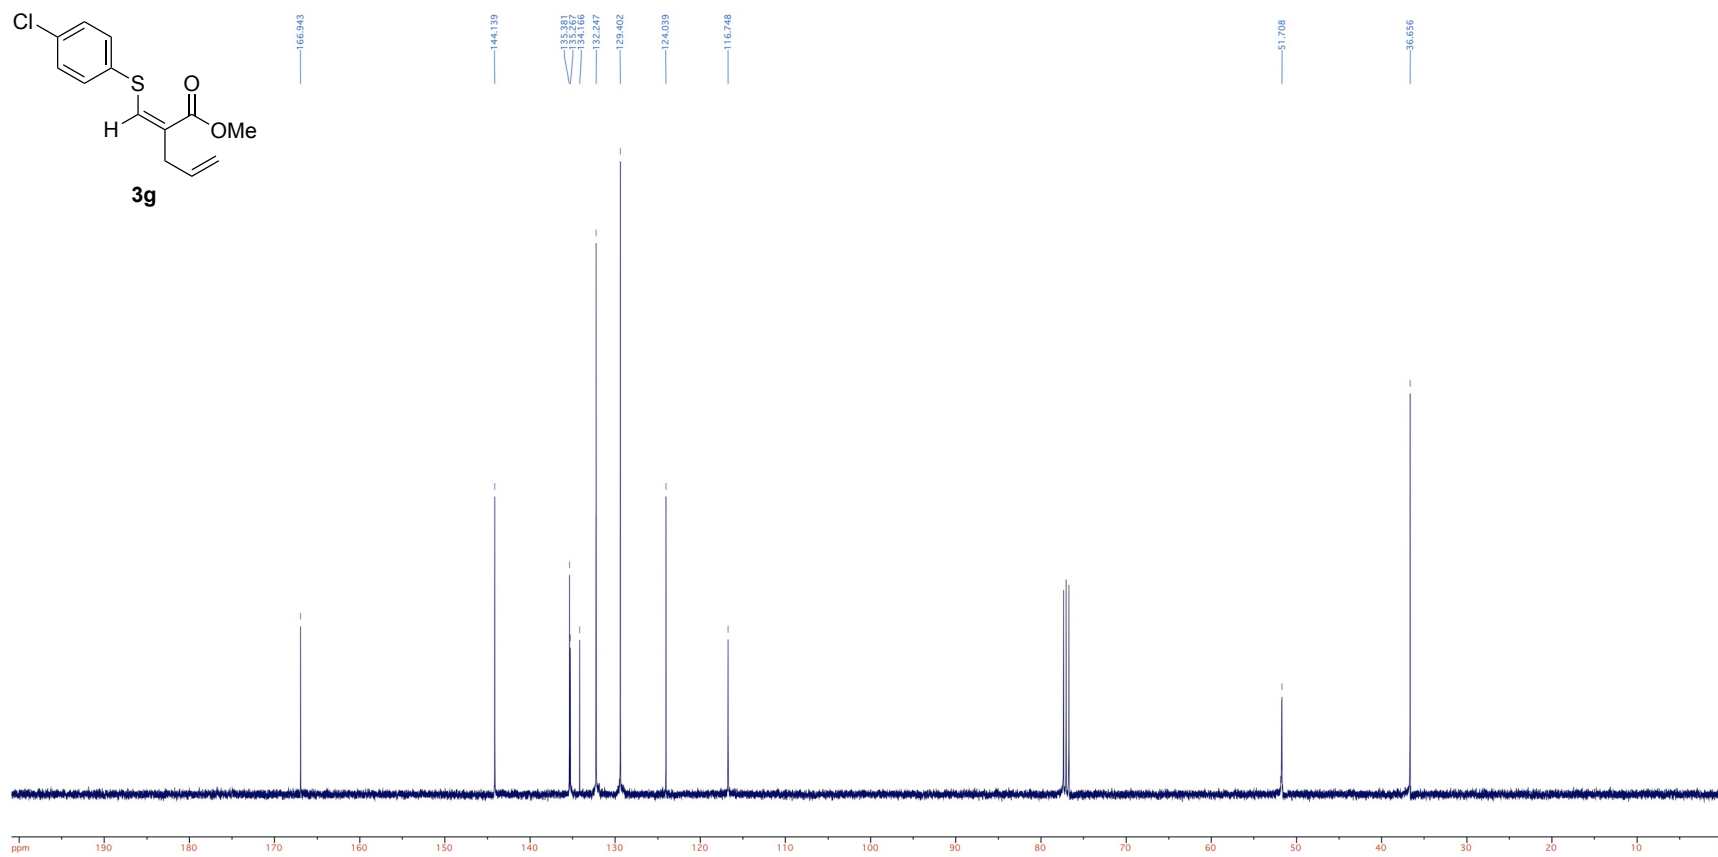

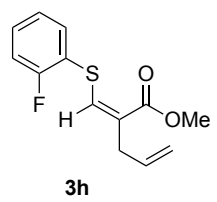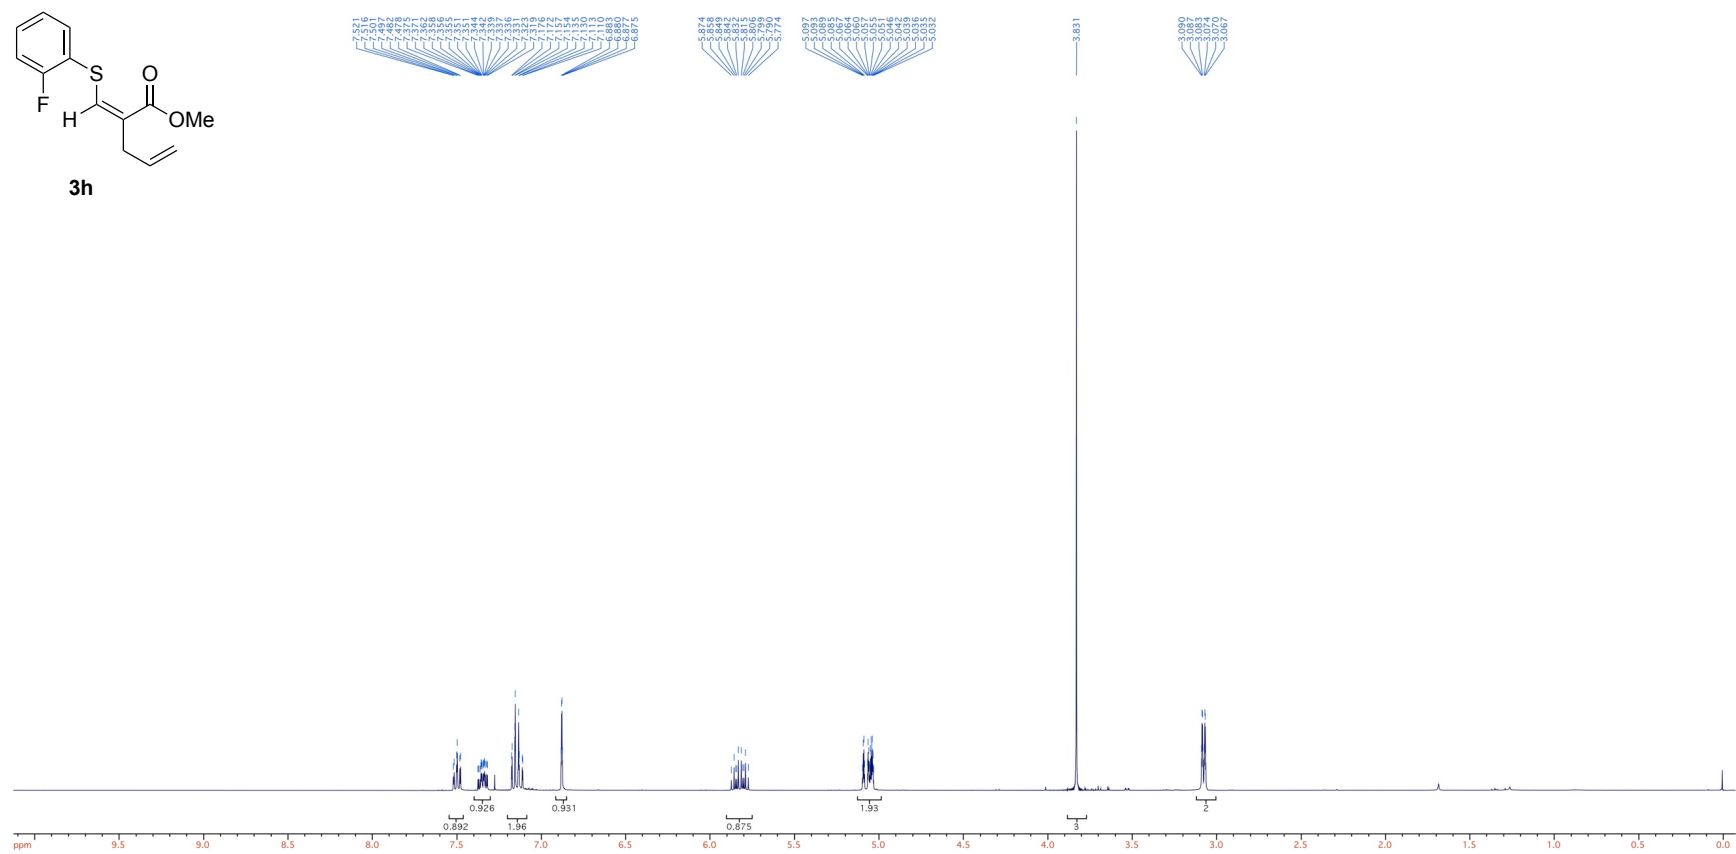

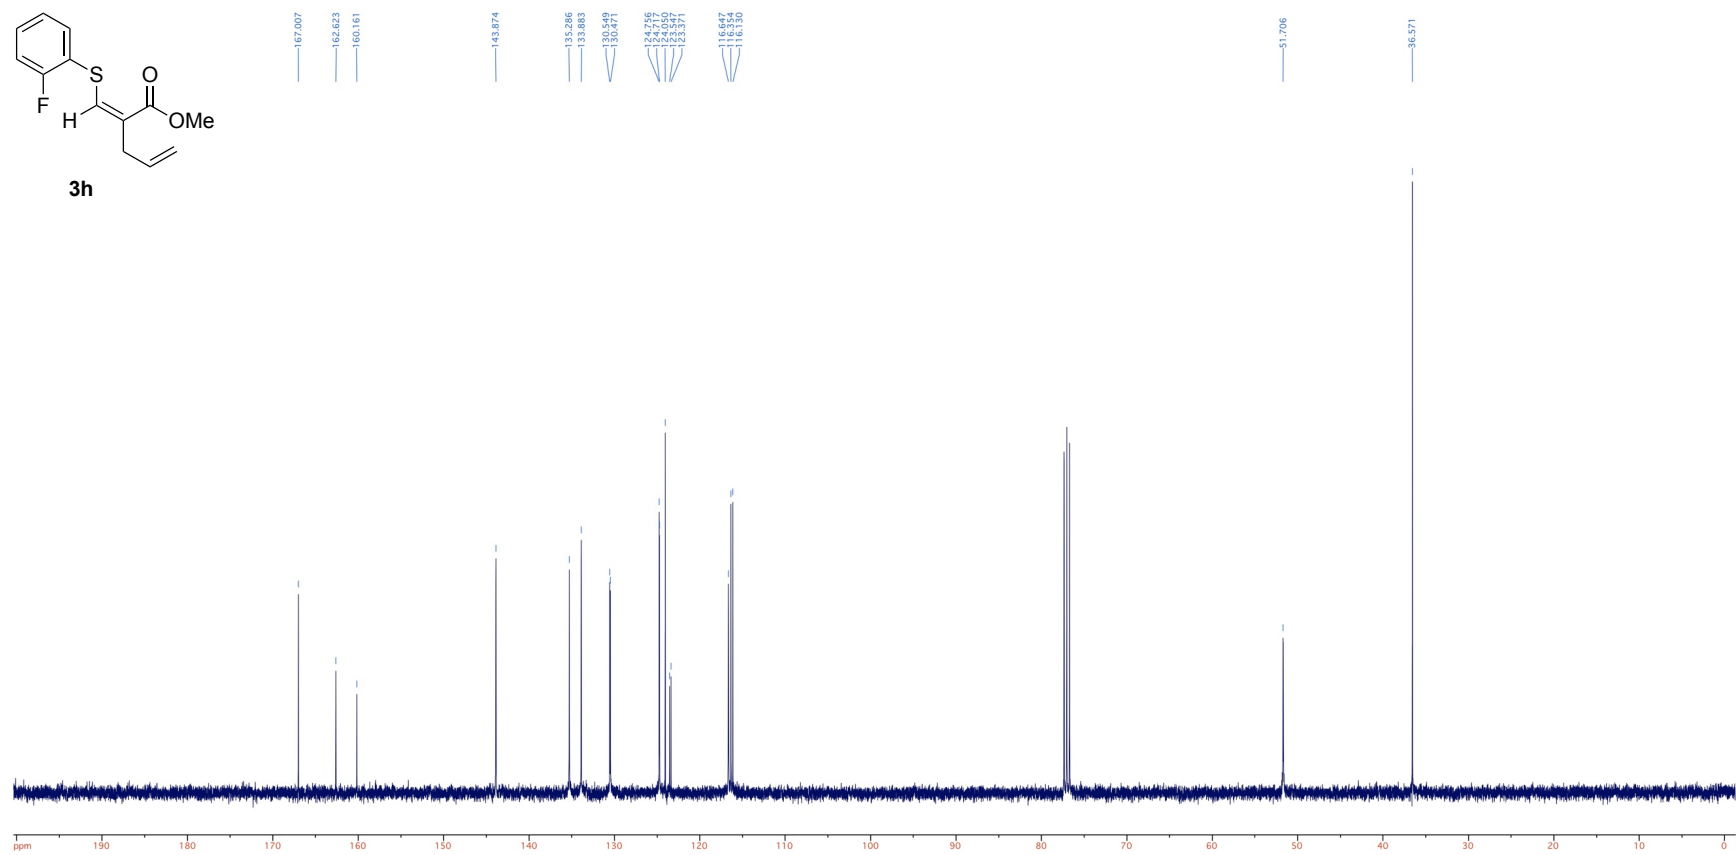

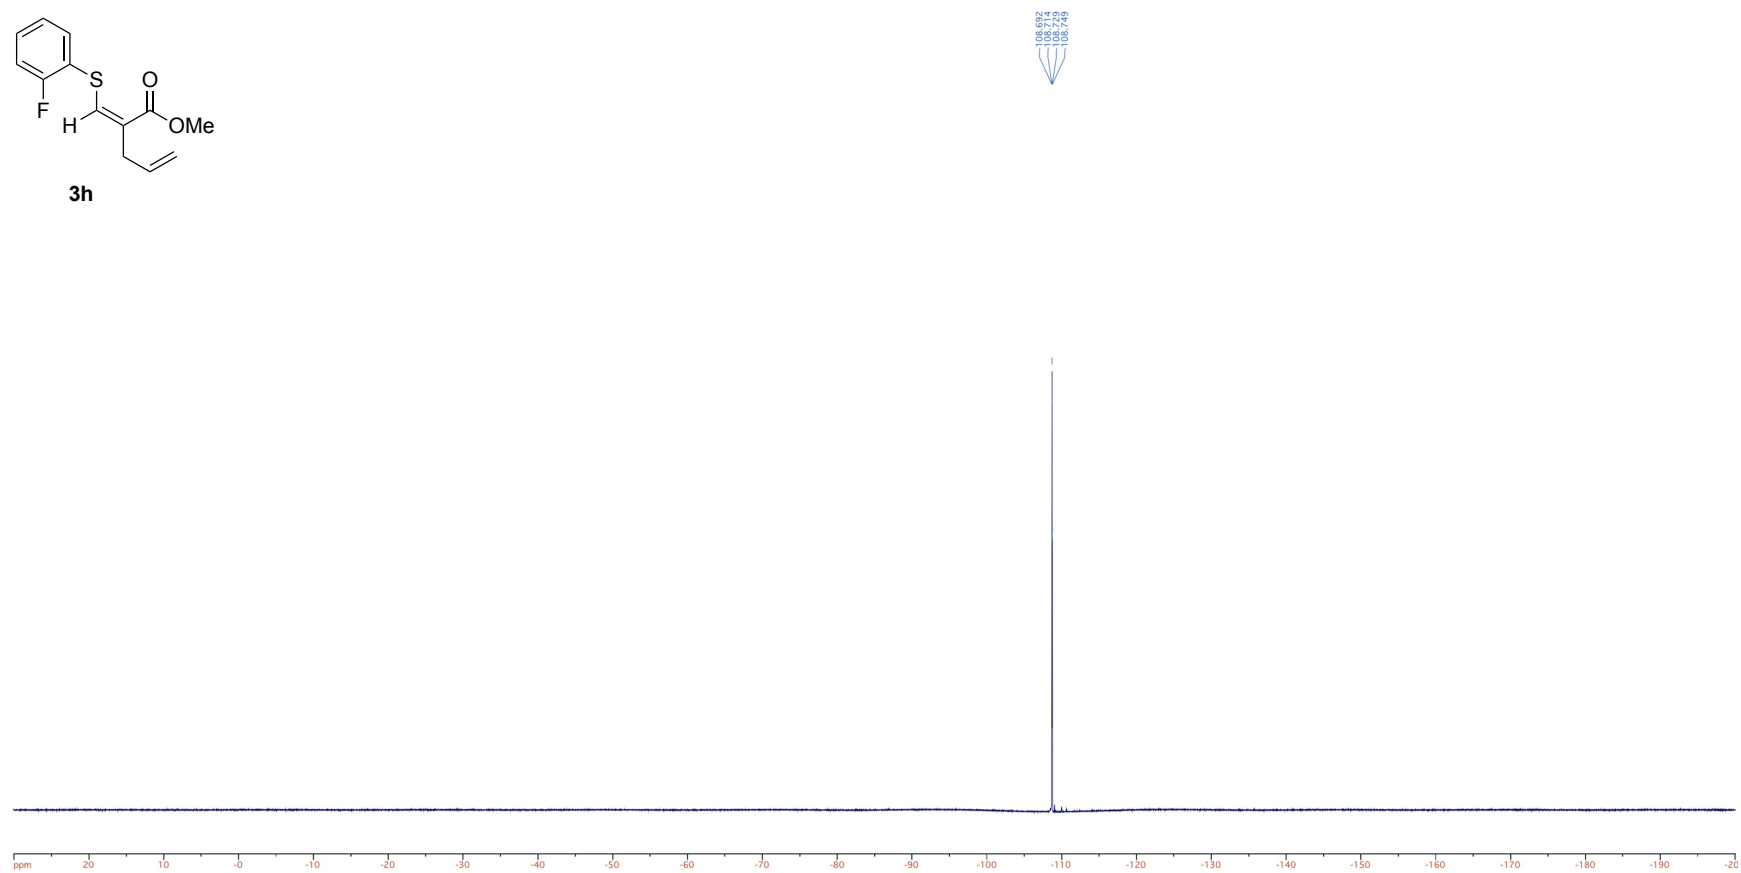

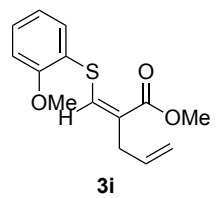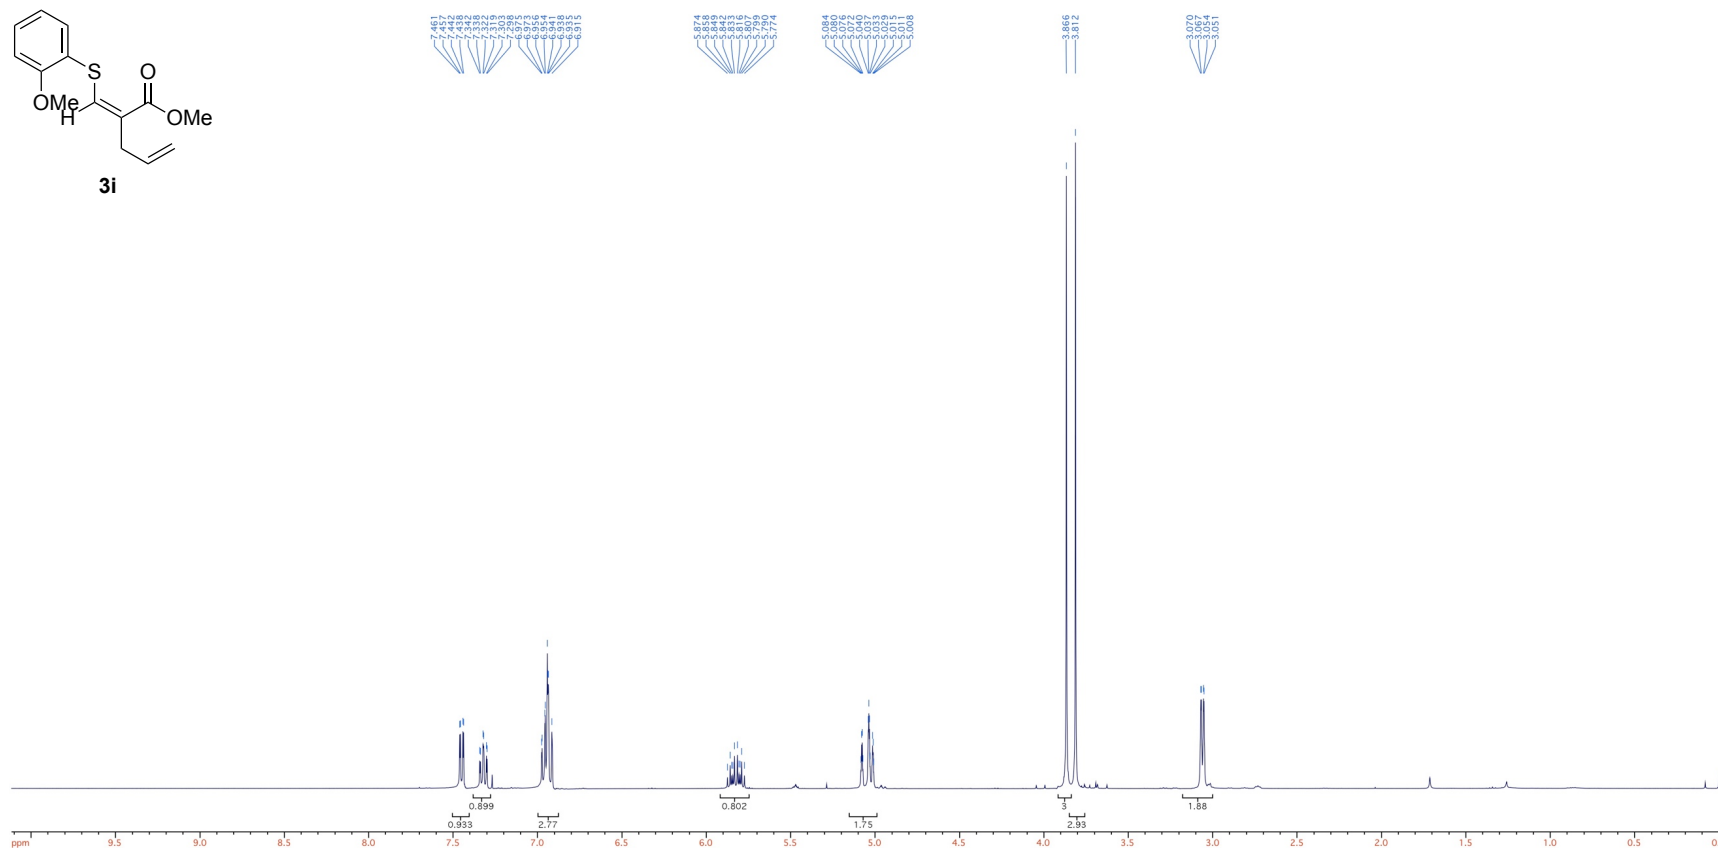

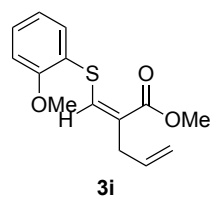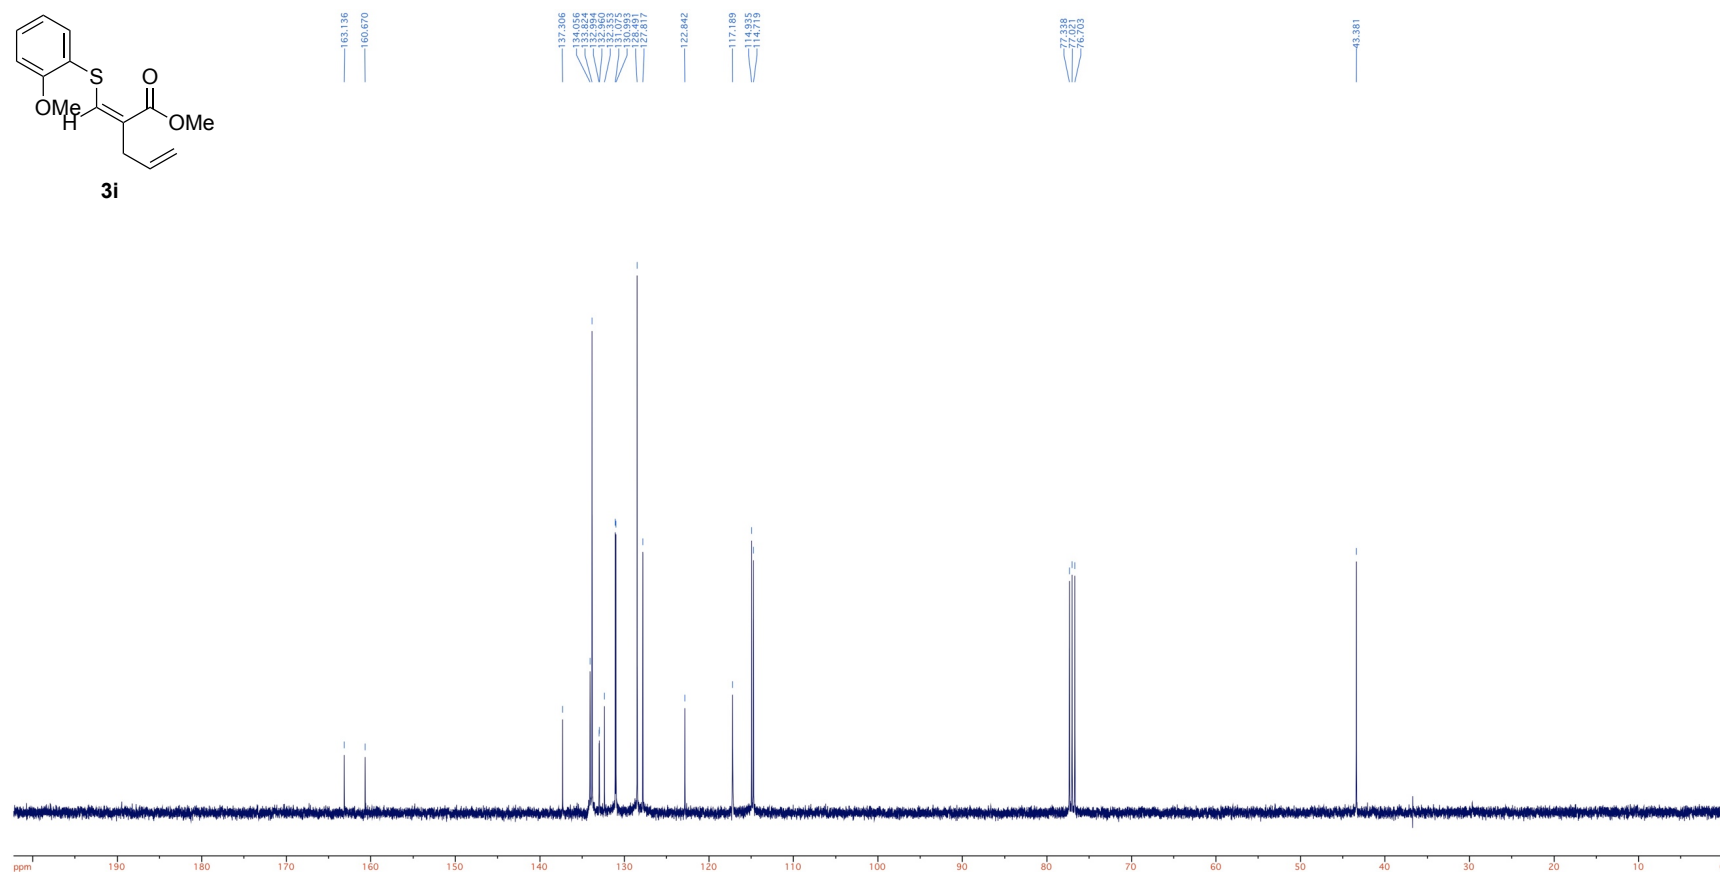

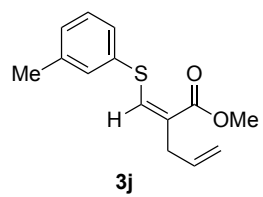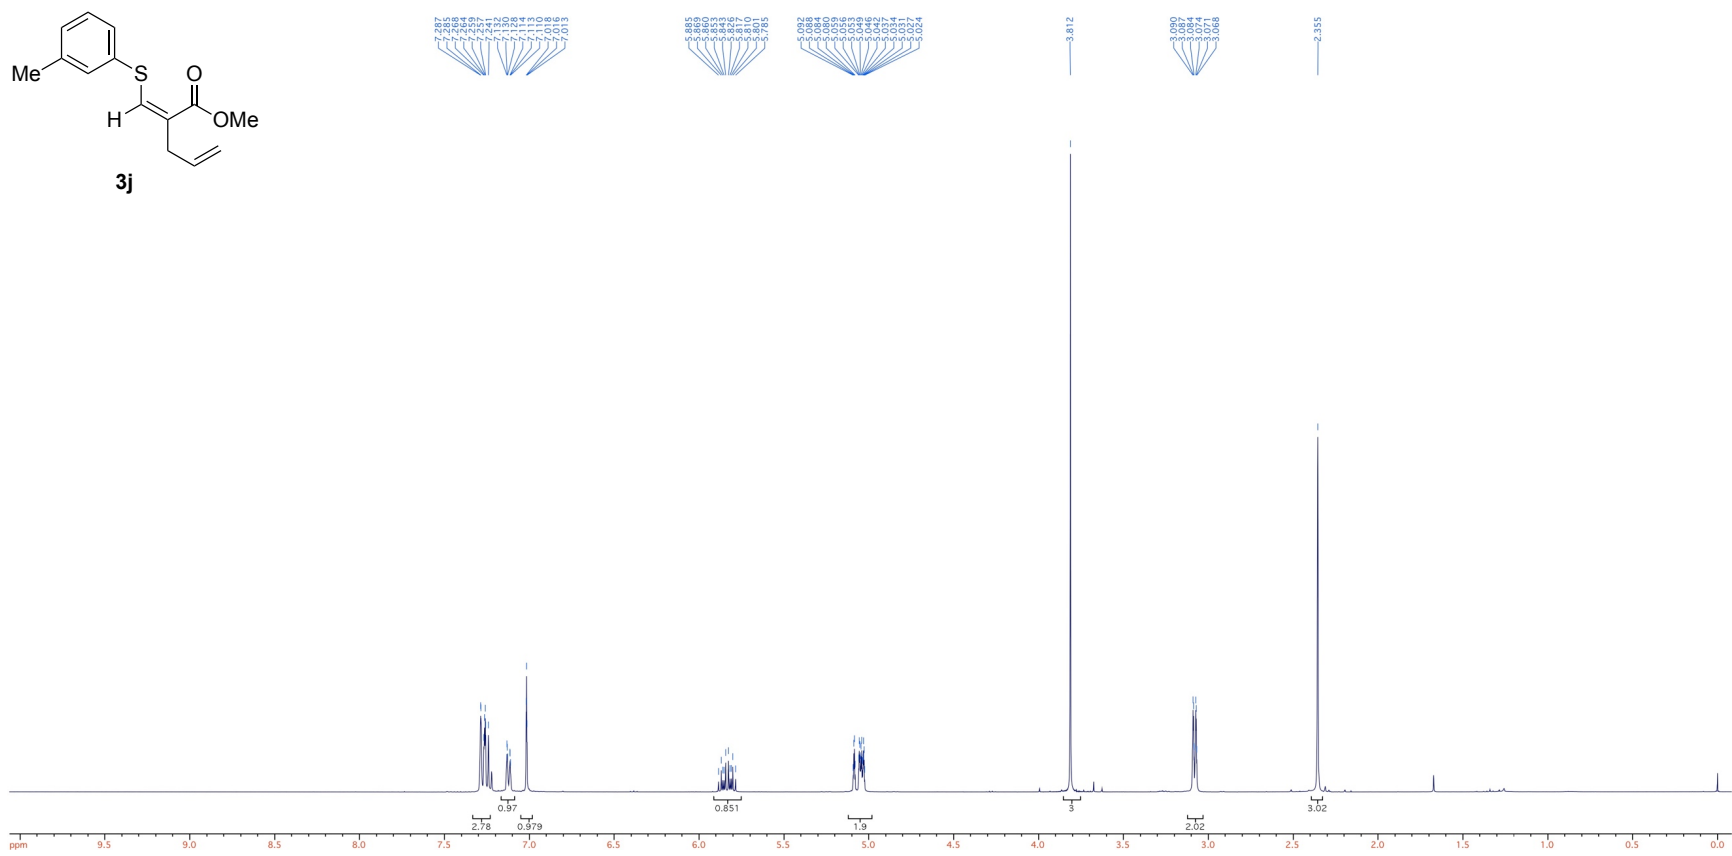



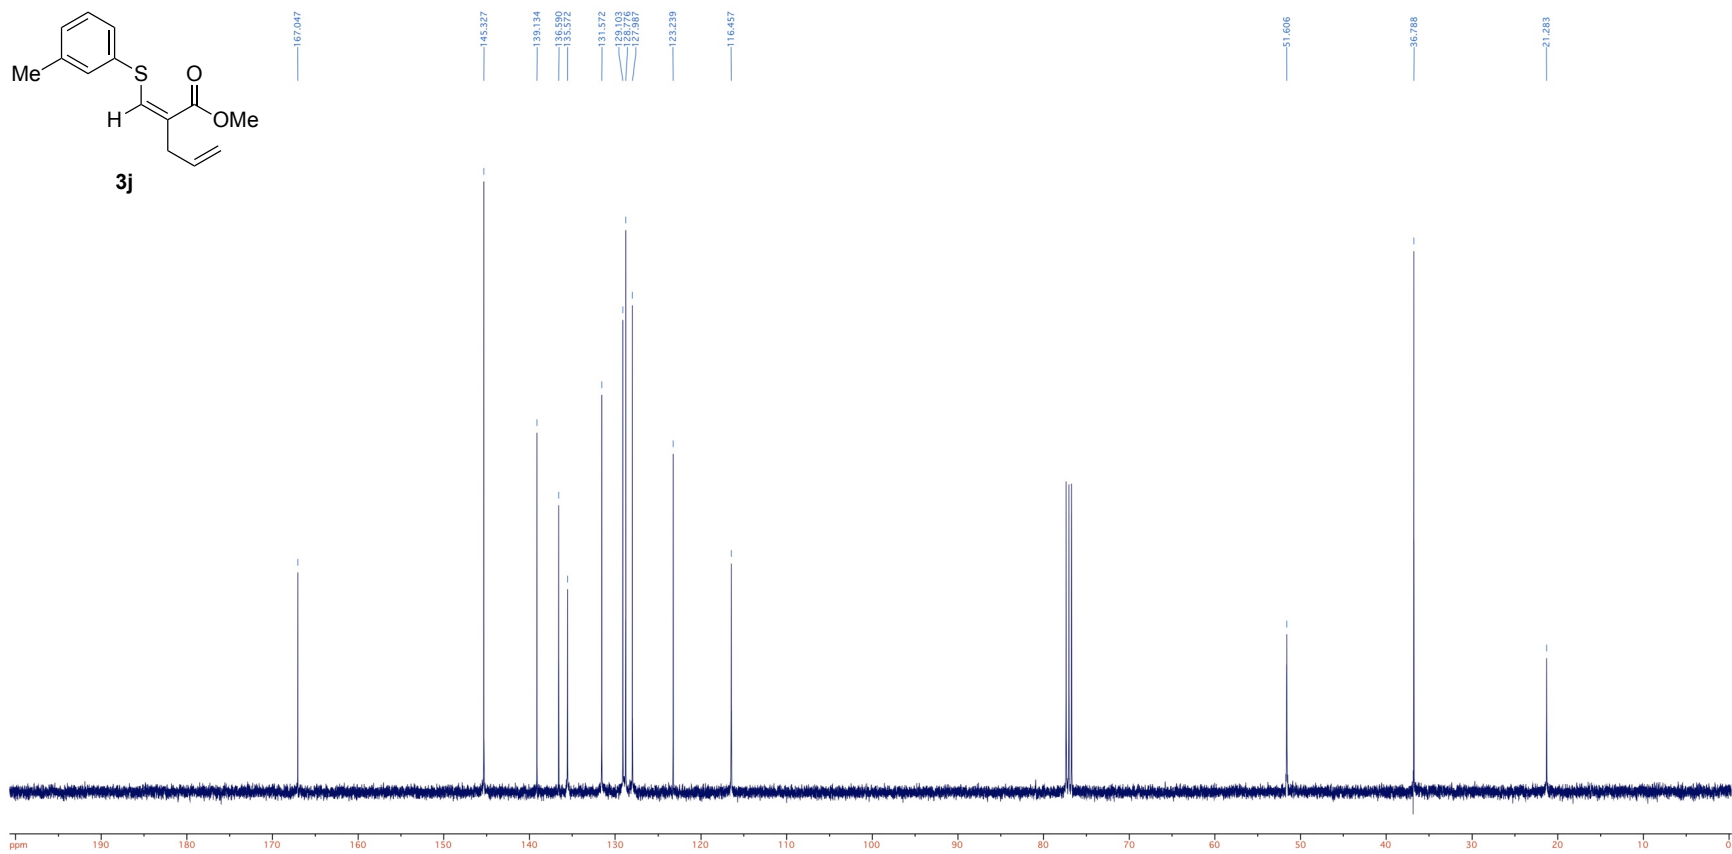

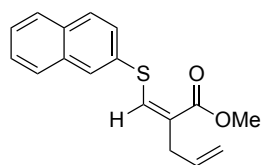

3k

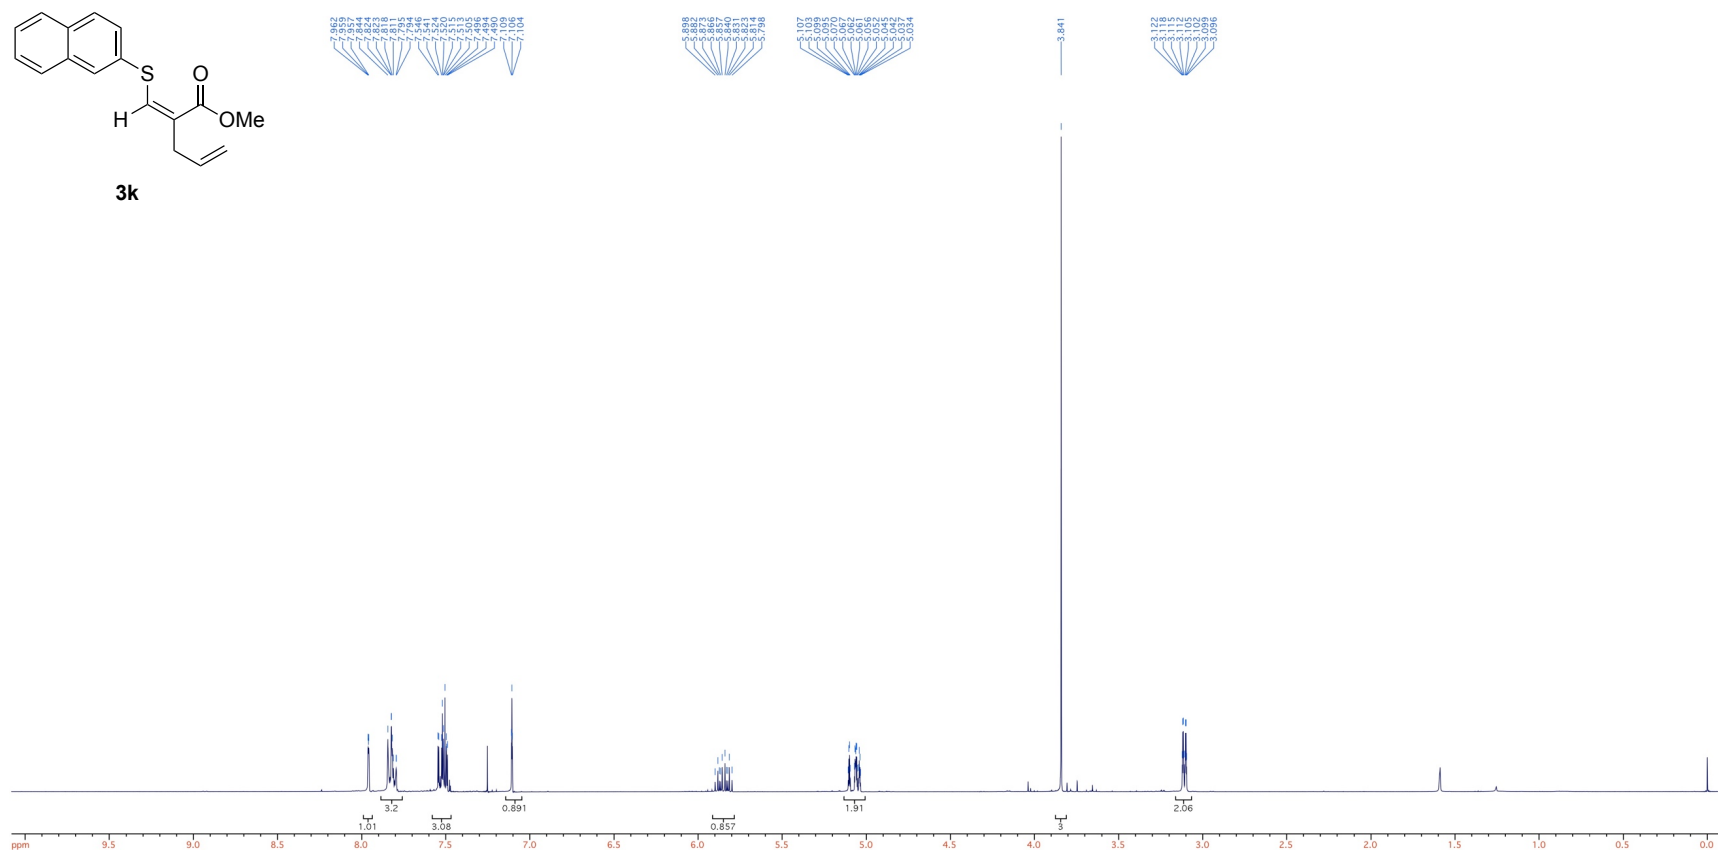

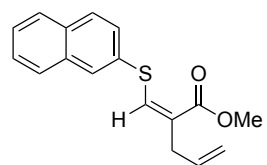

3k

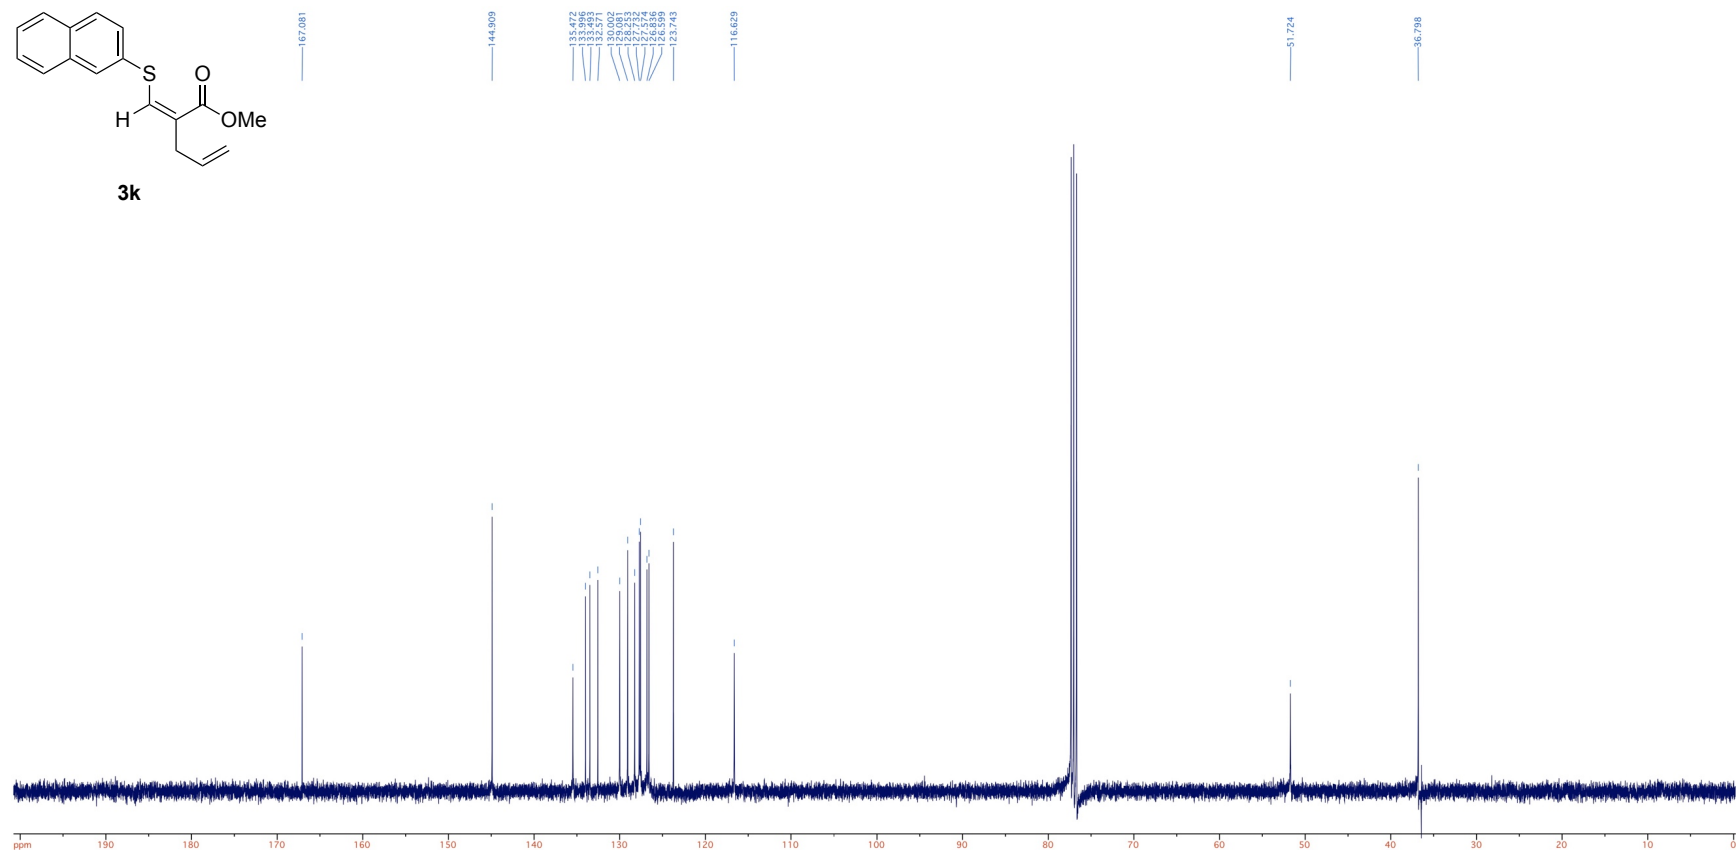

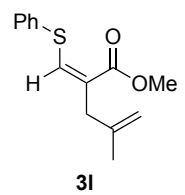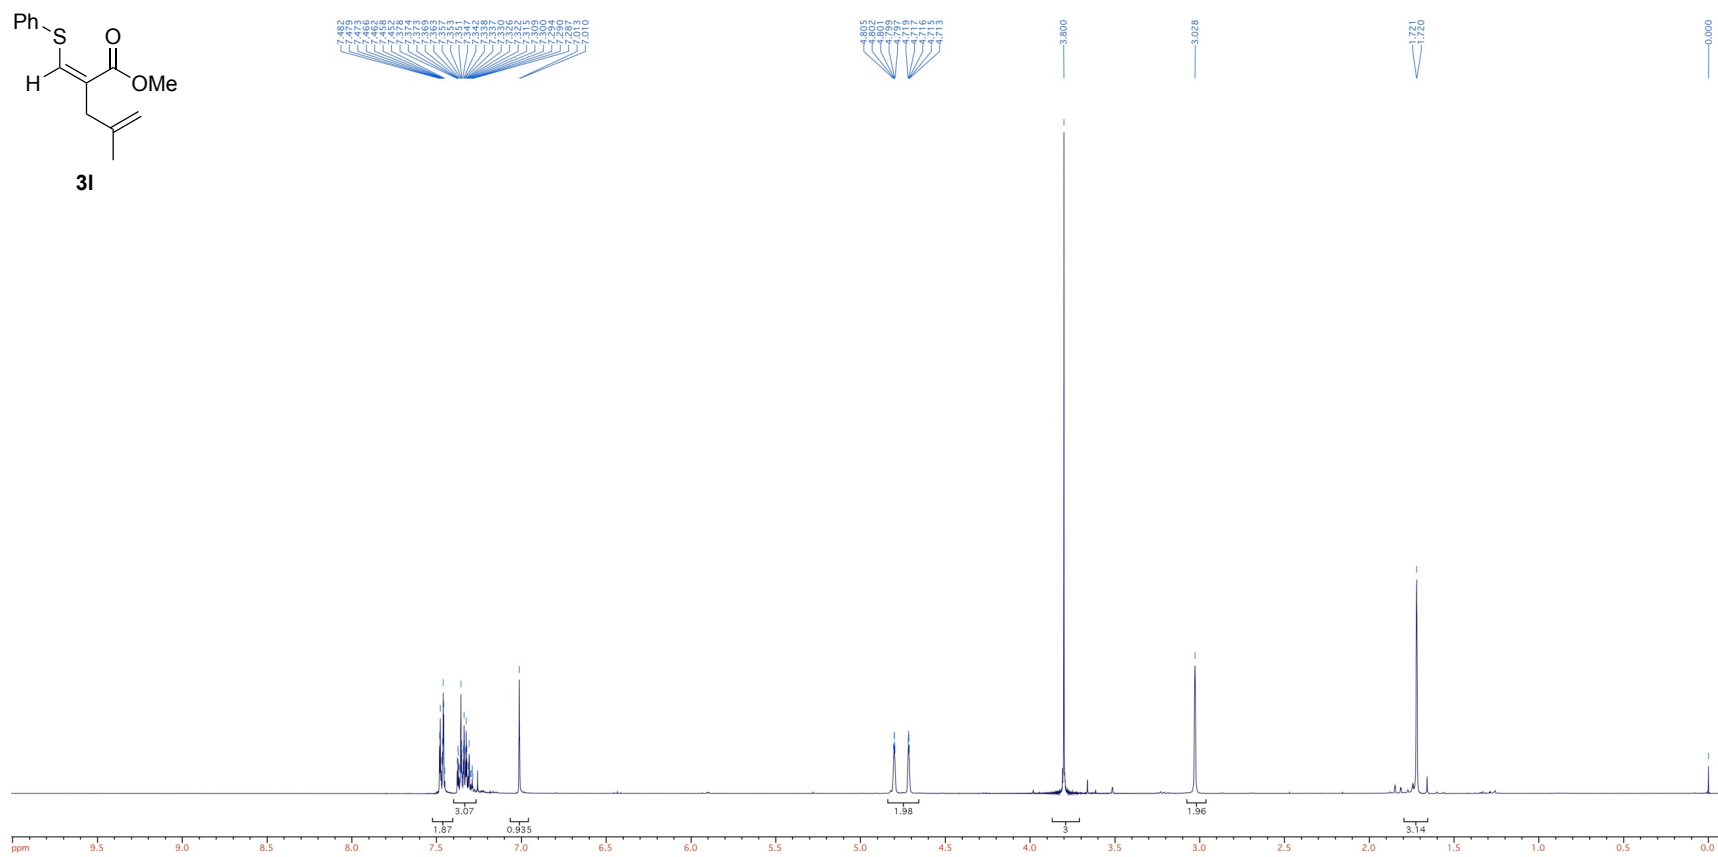

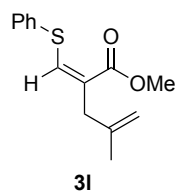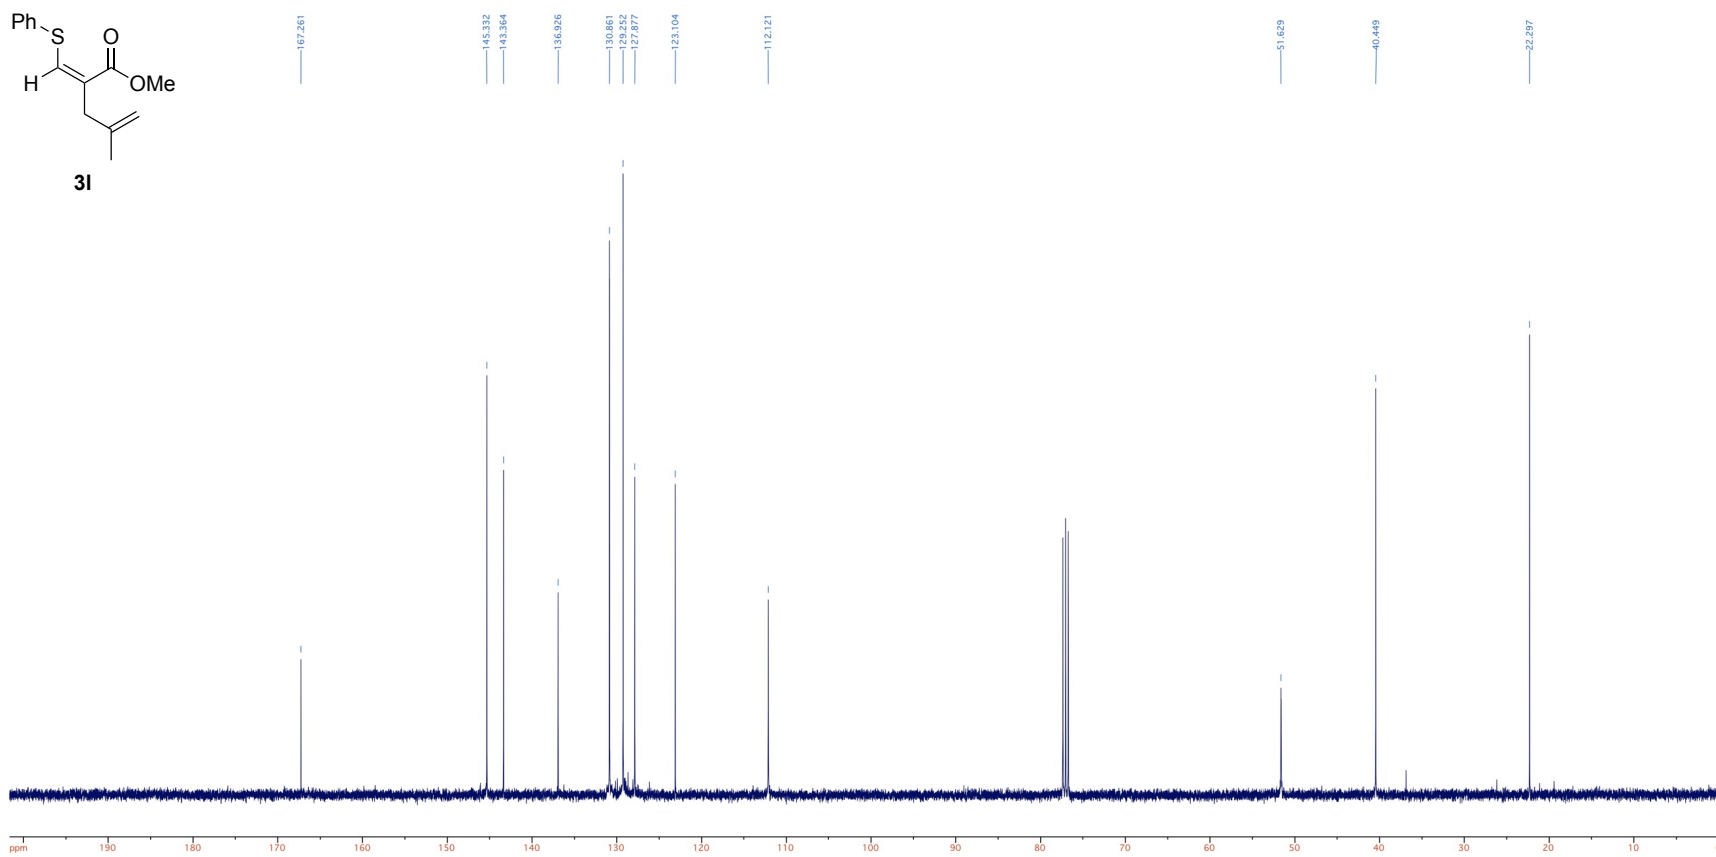

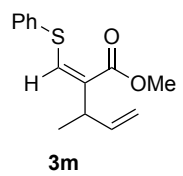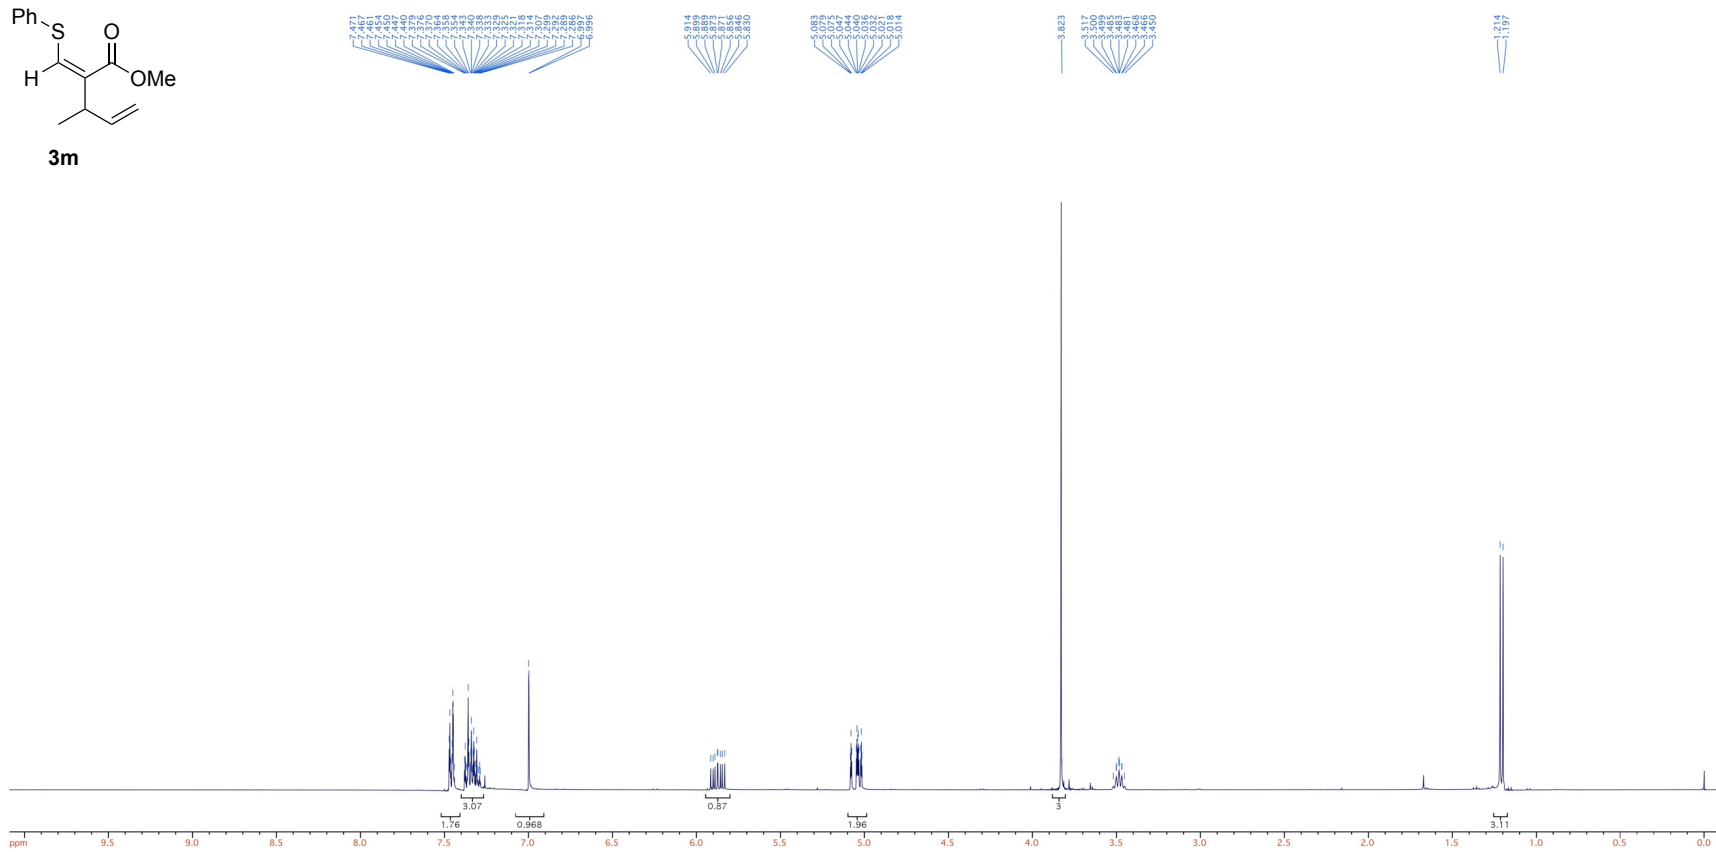

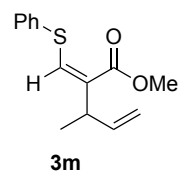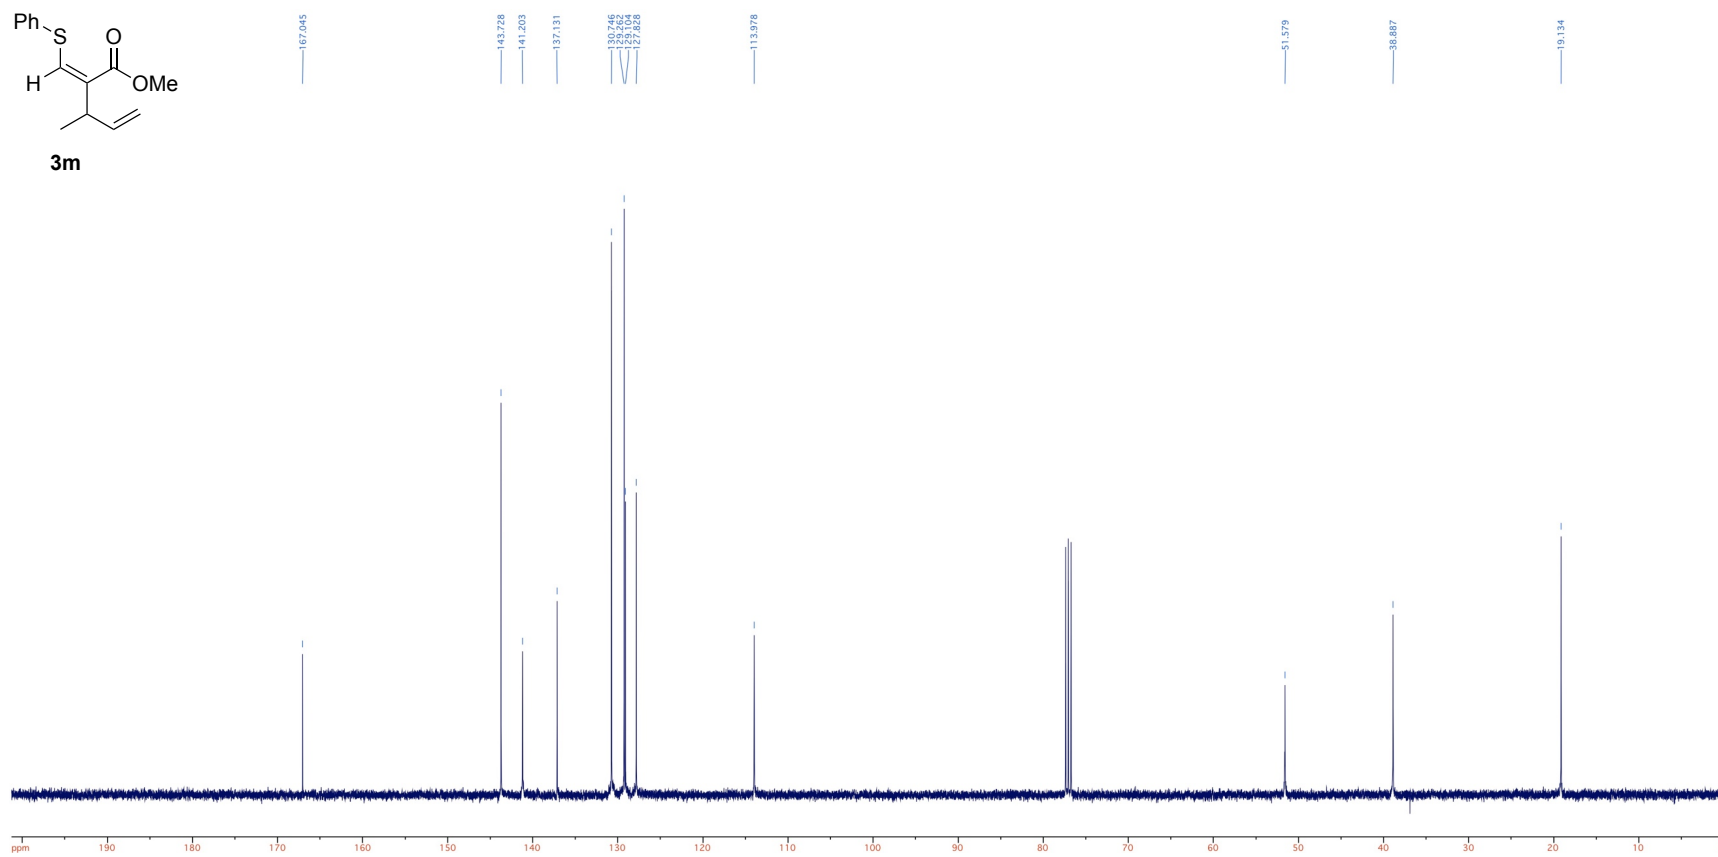

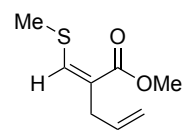

3n

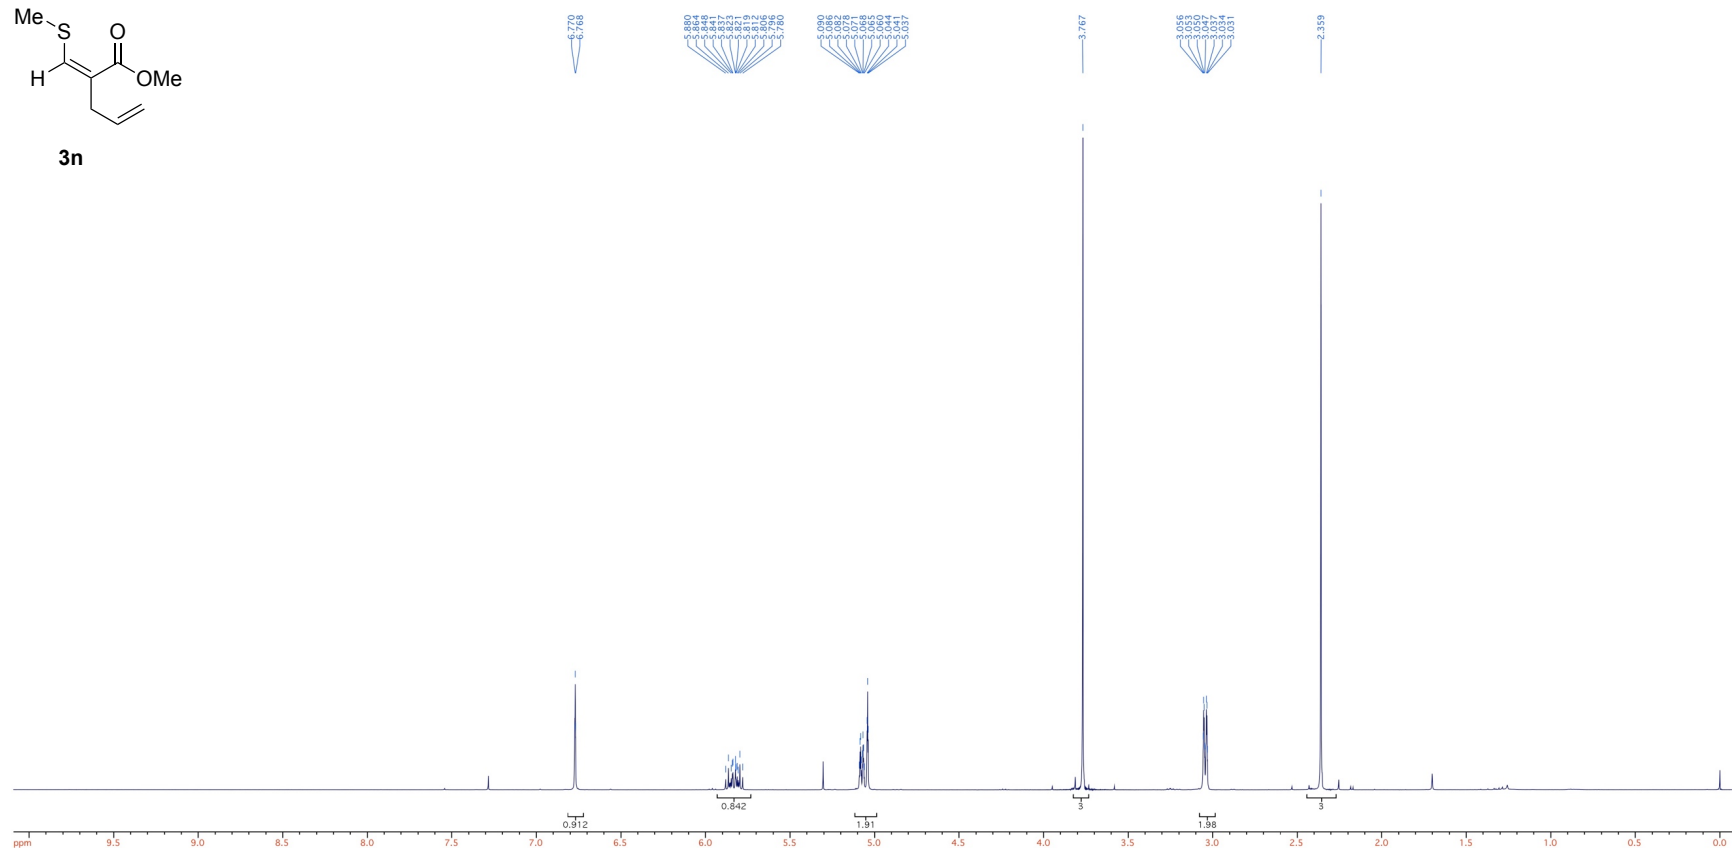



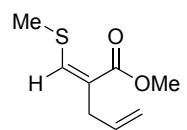

**3n**

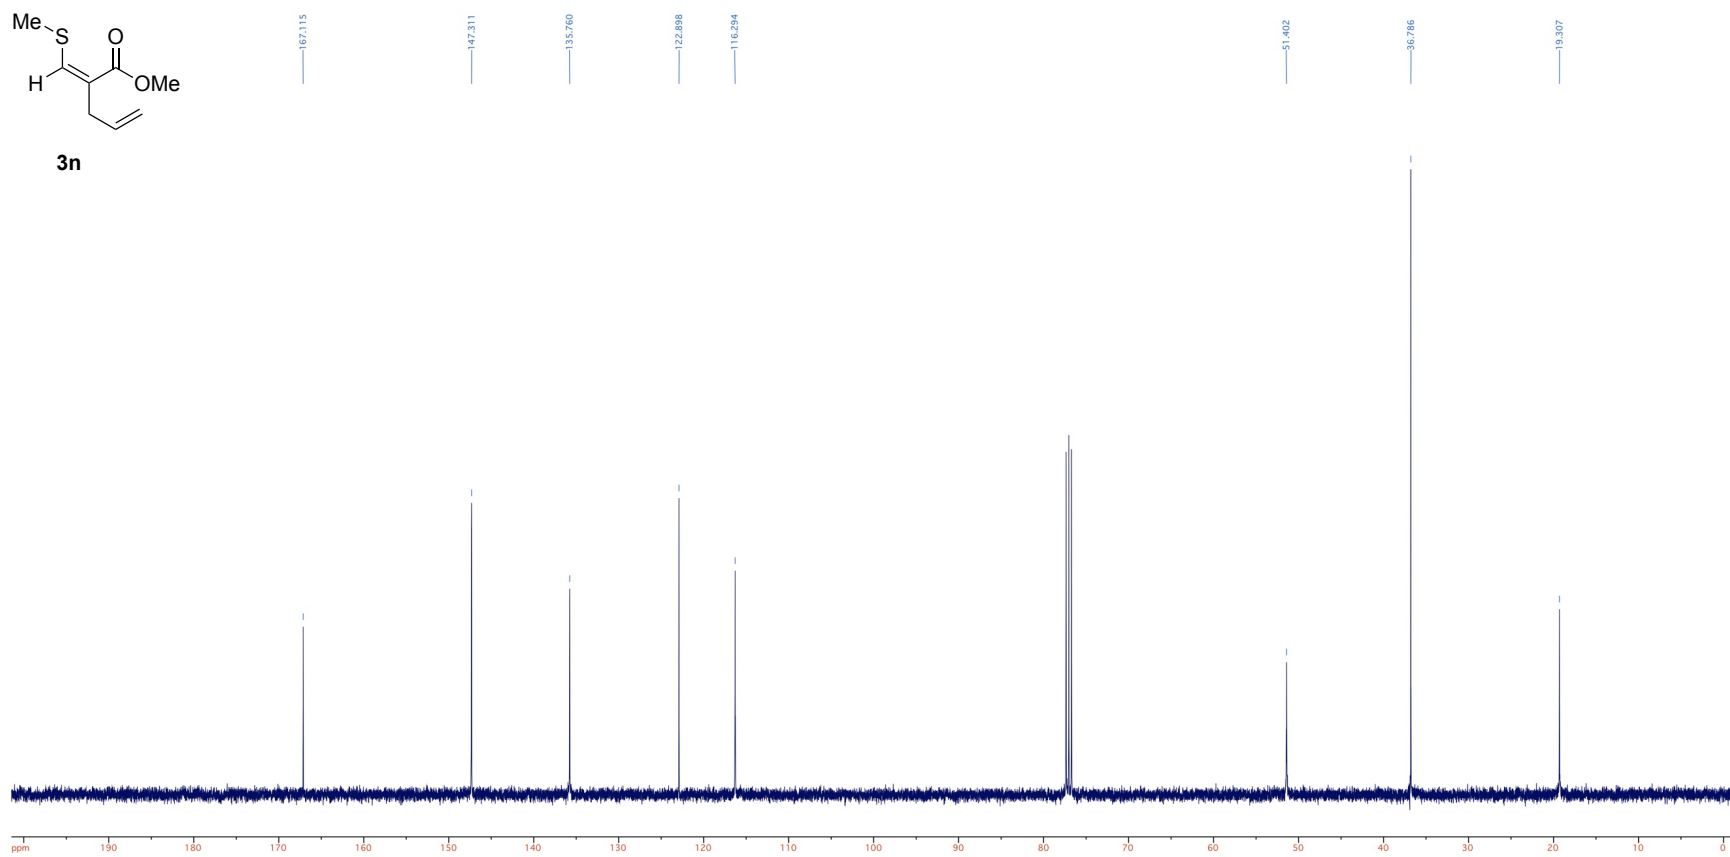

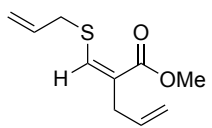

3o

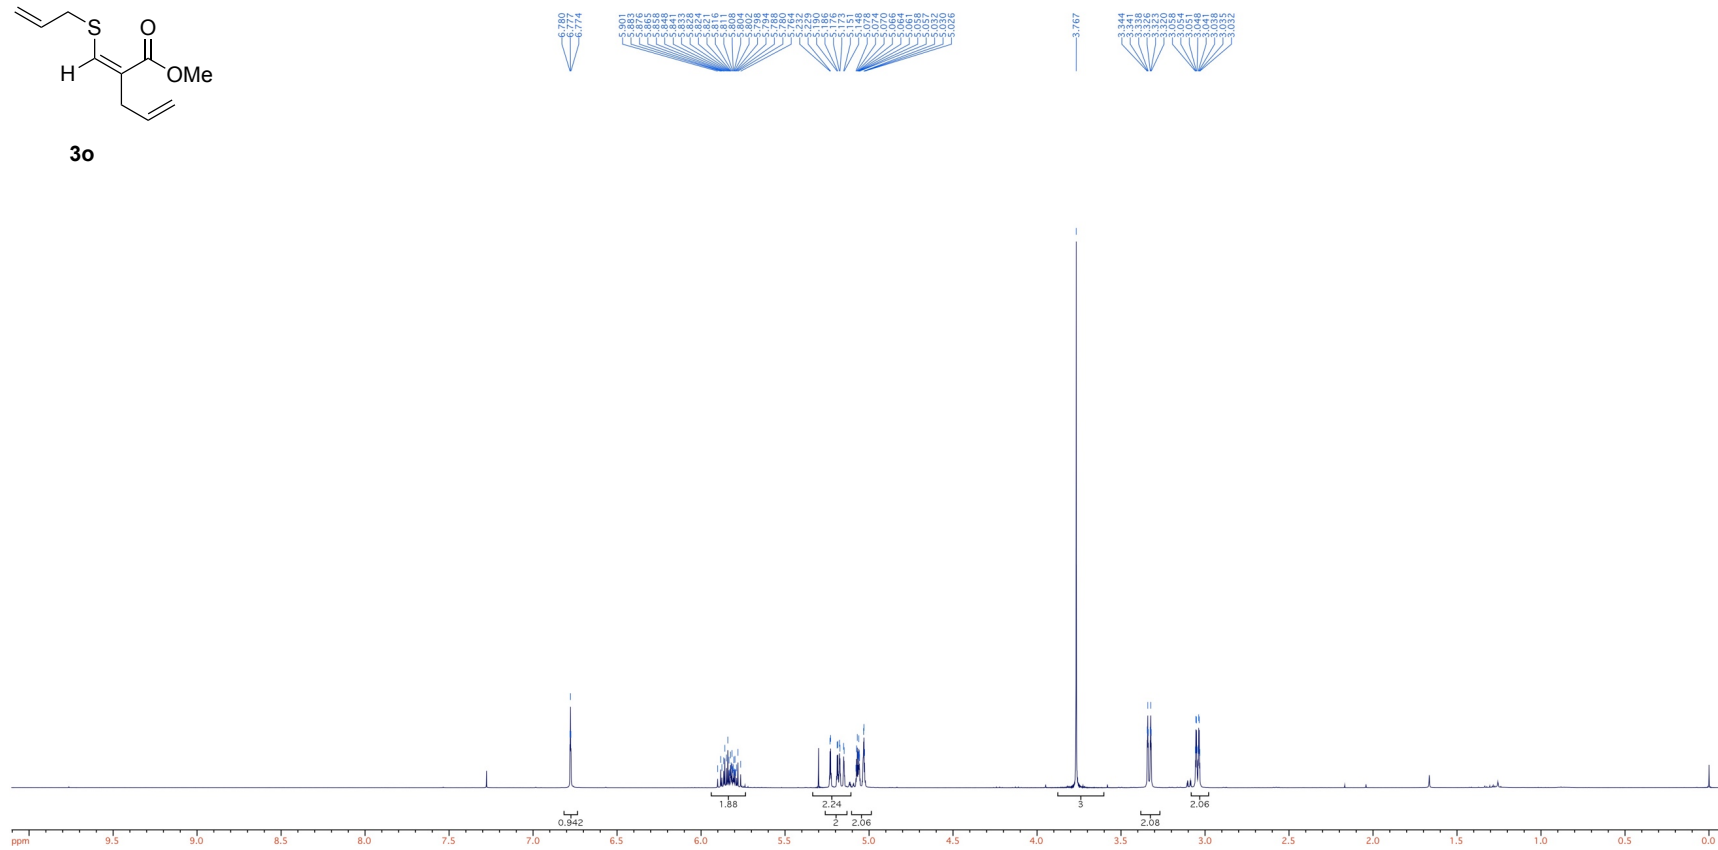

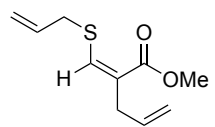

3o

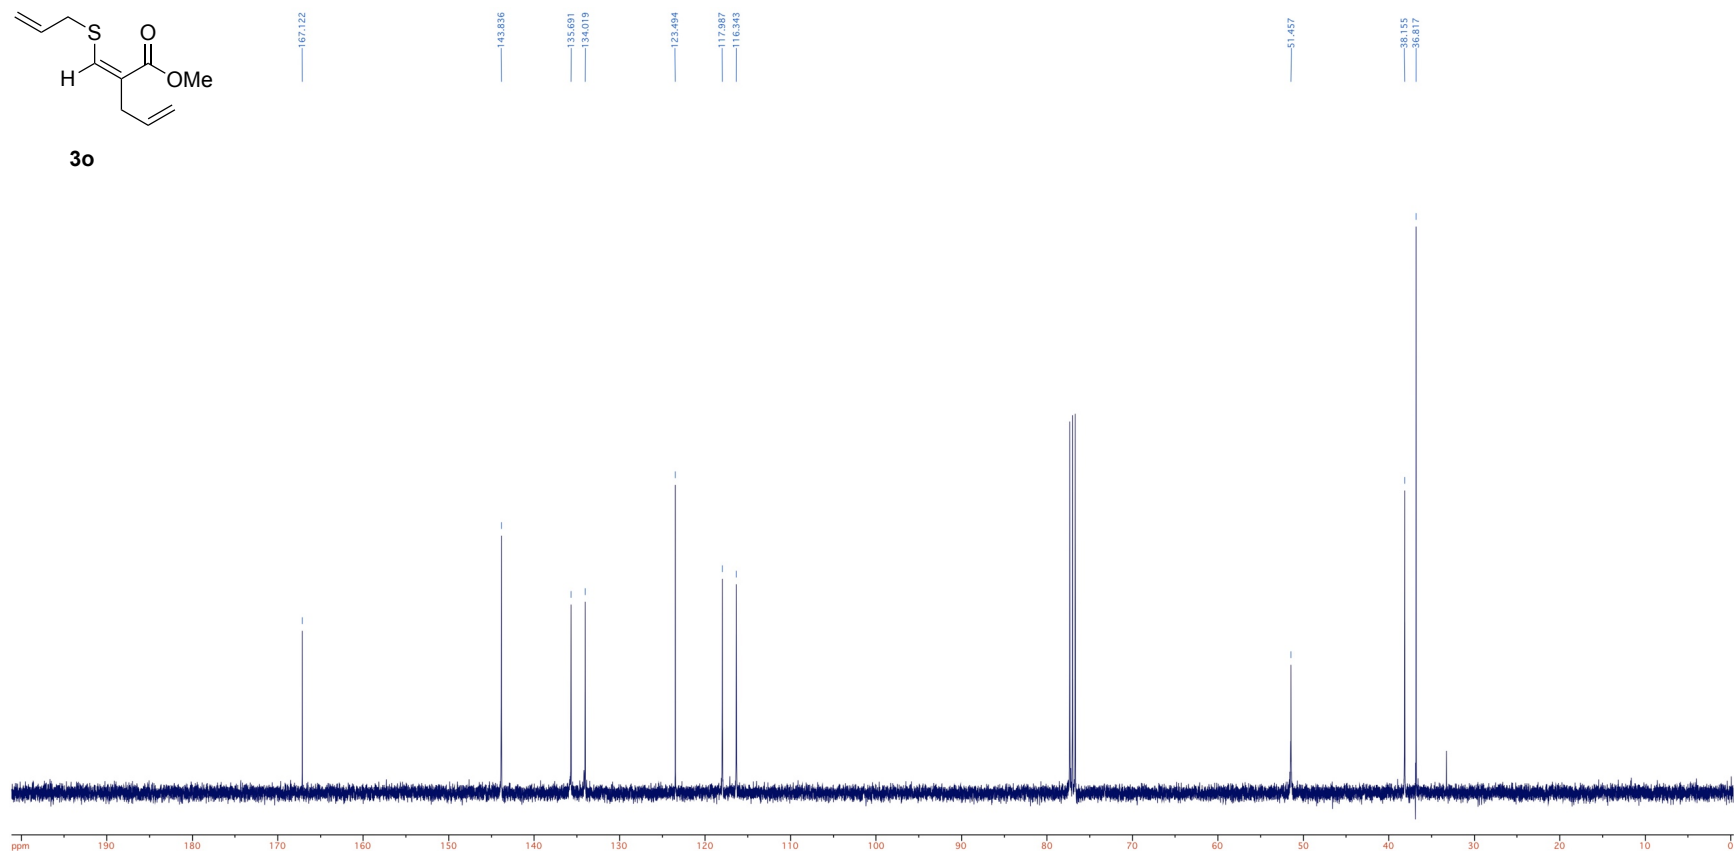

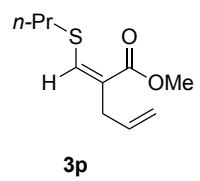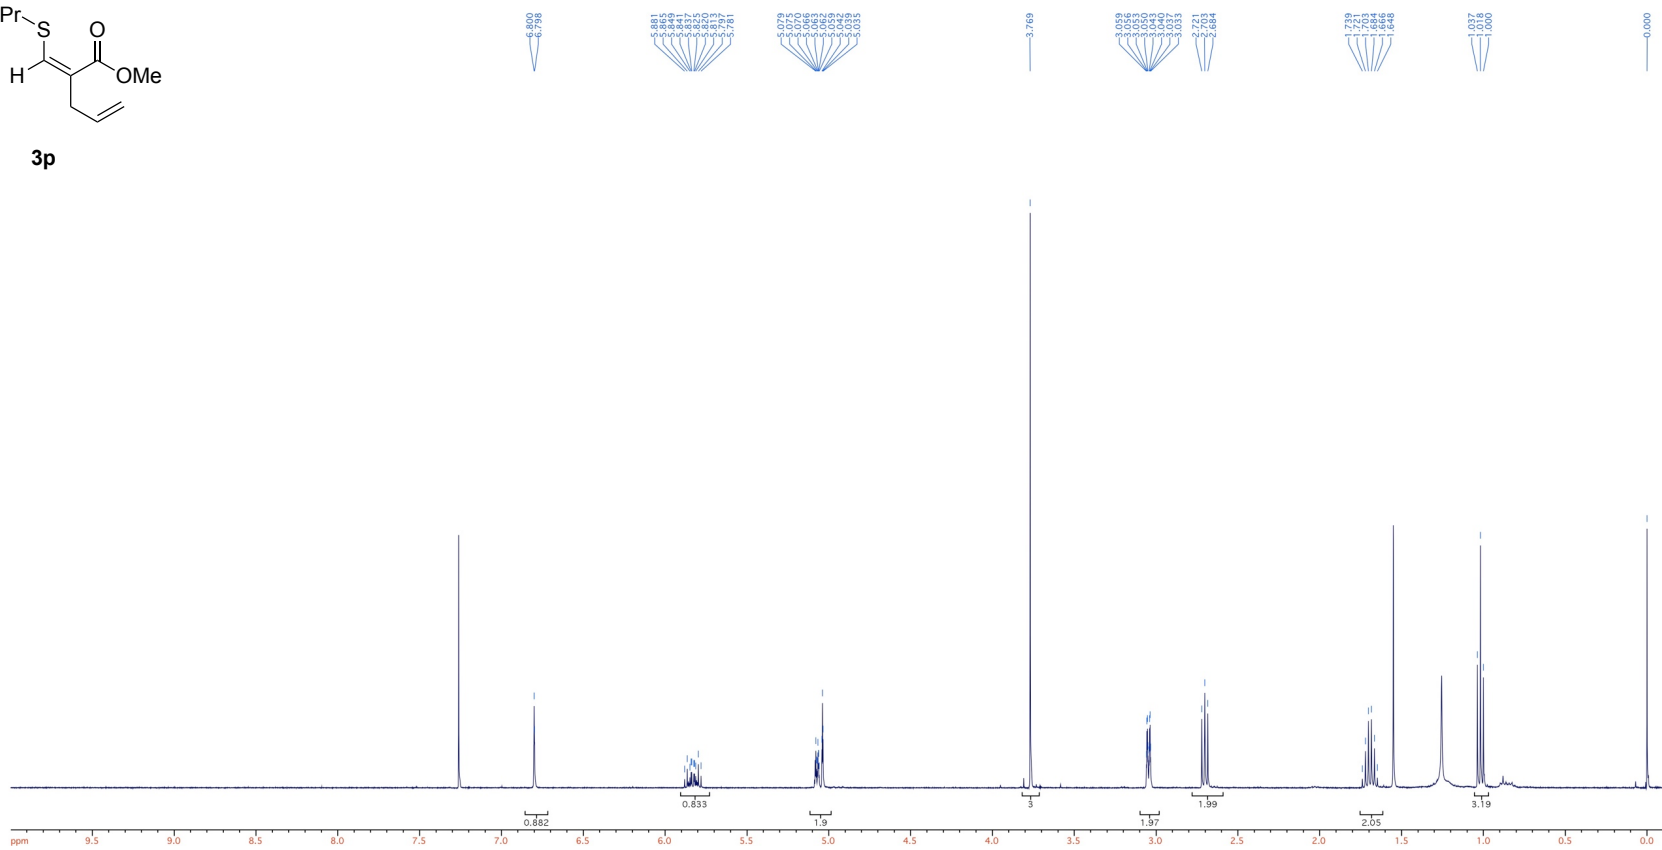

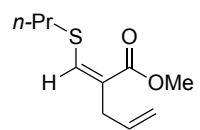

3p

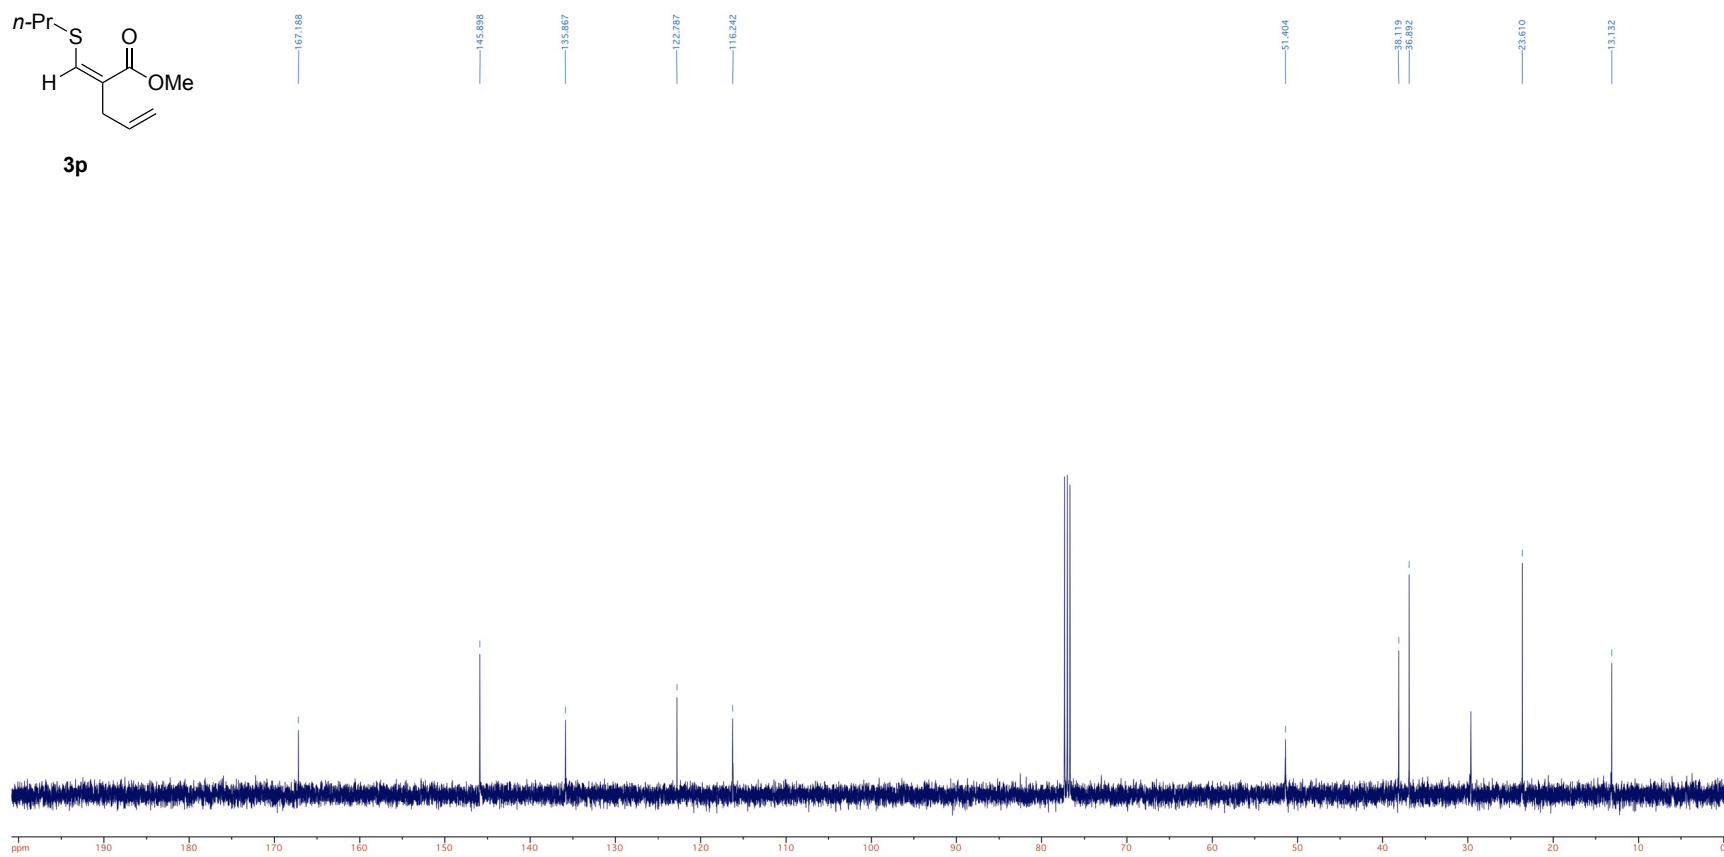

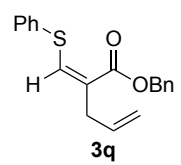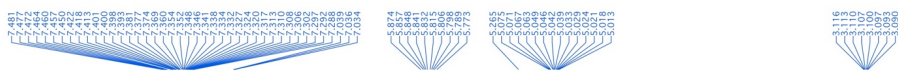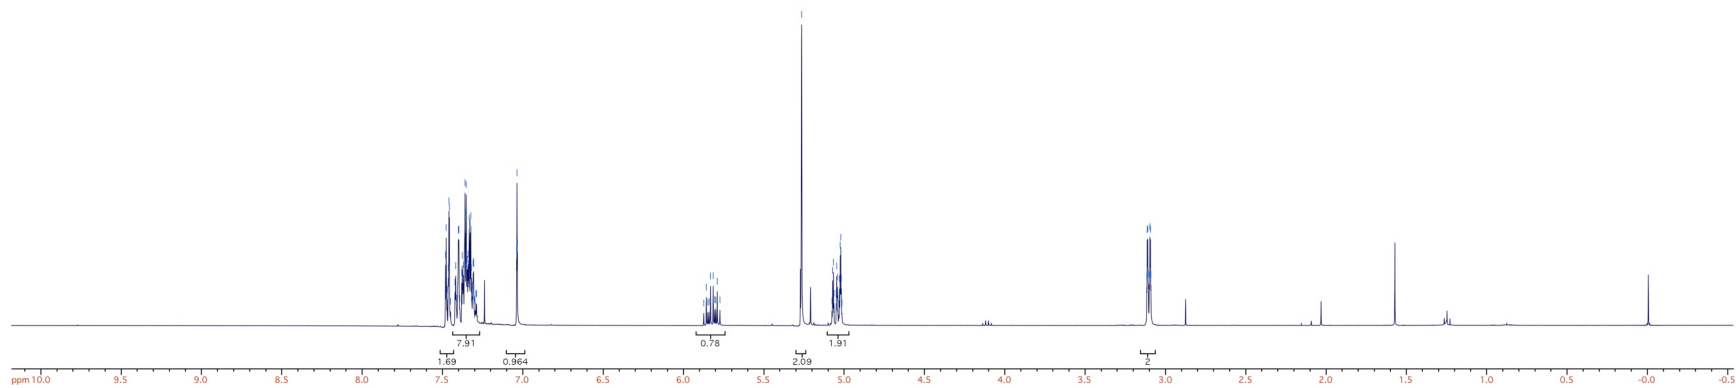

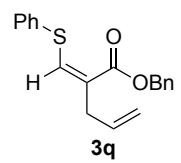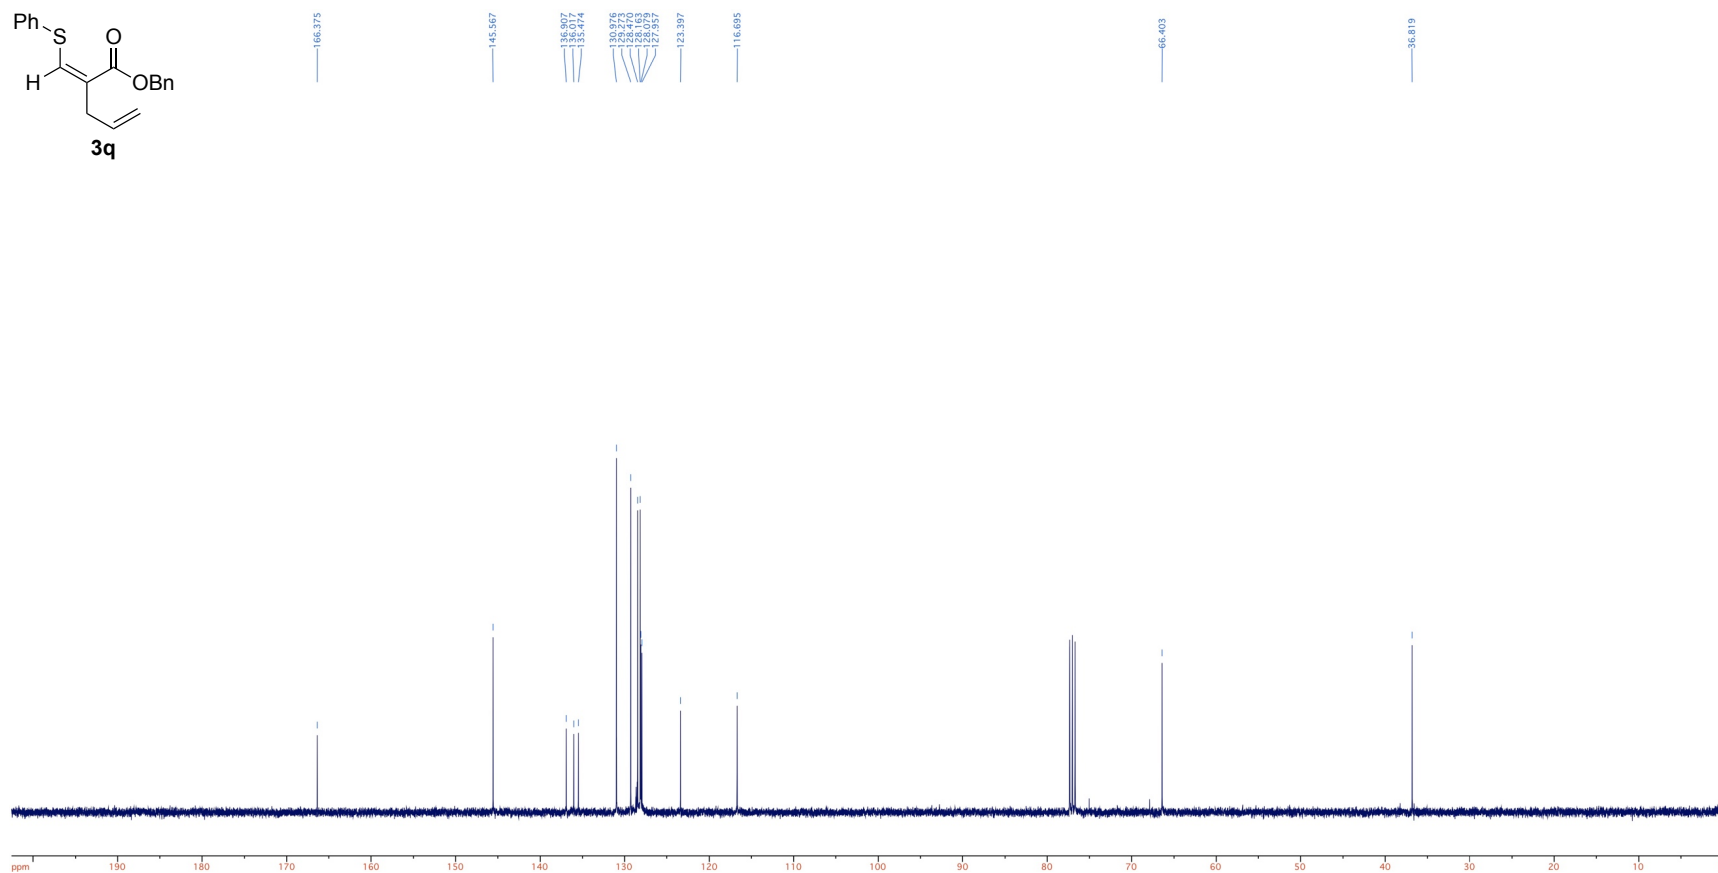

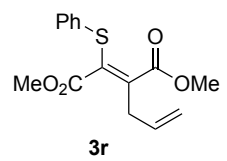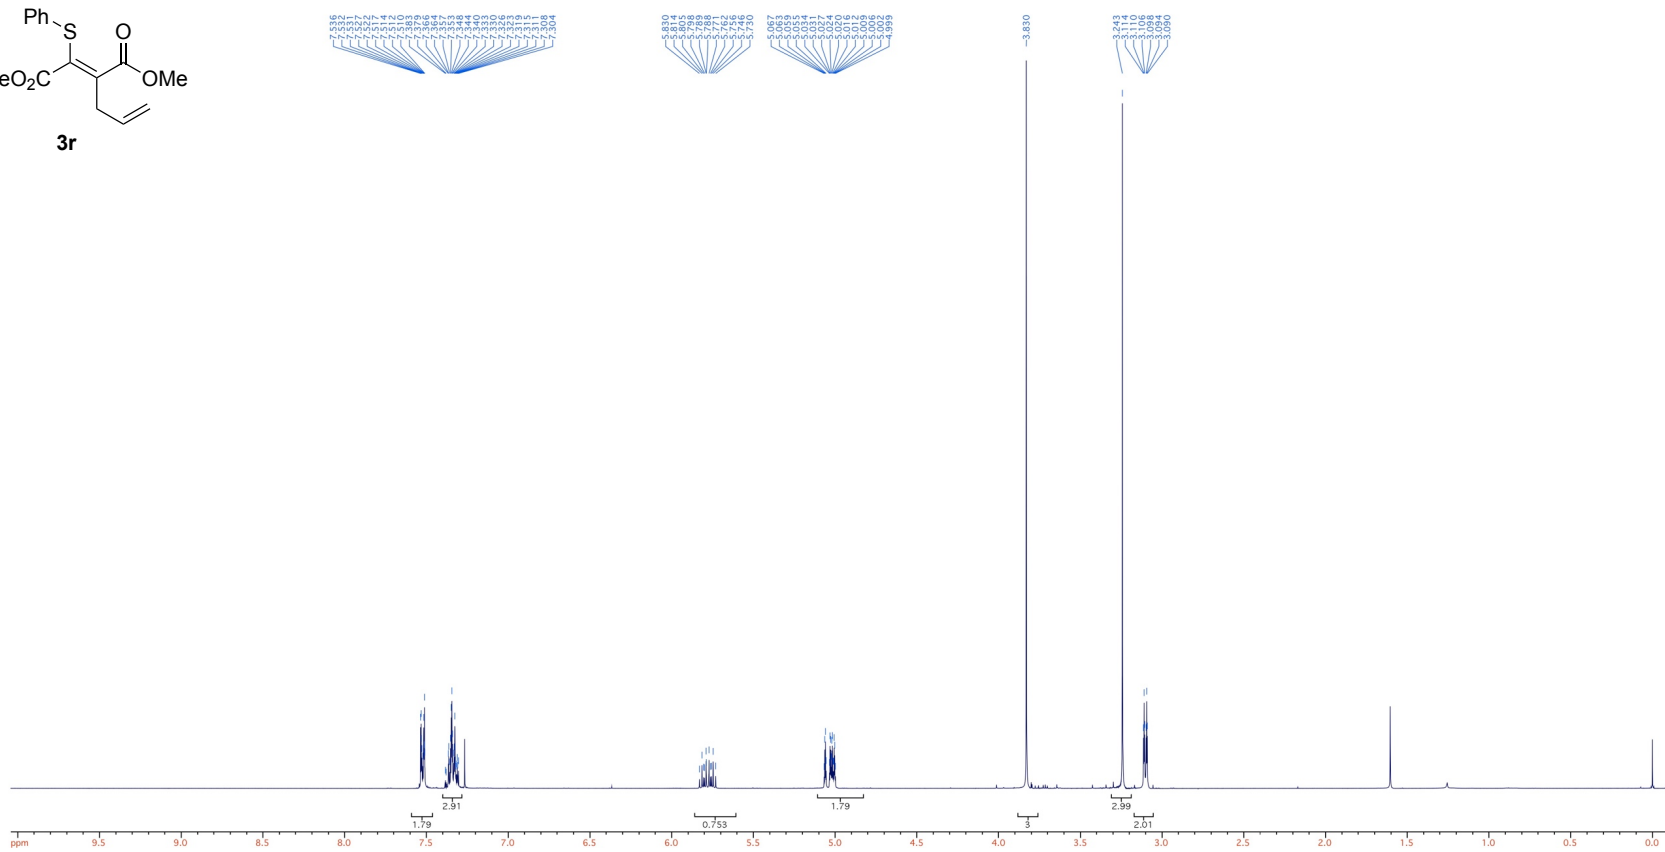



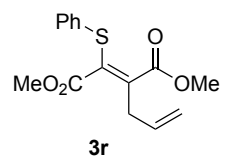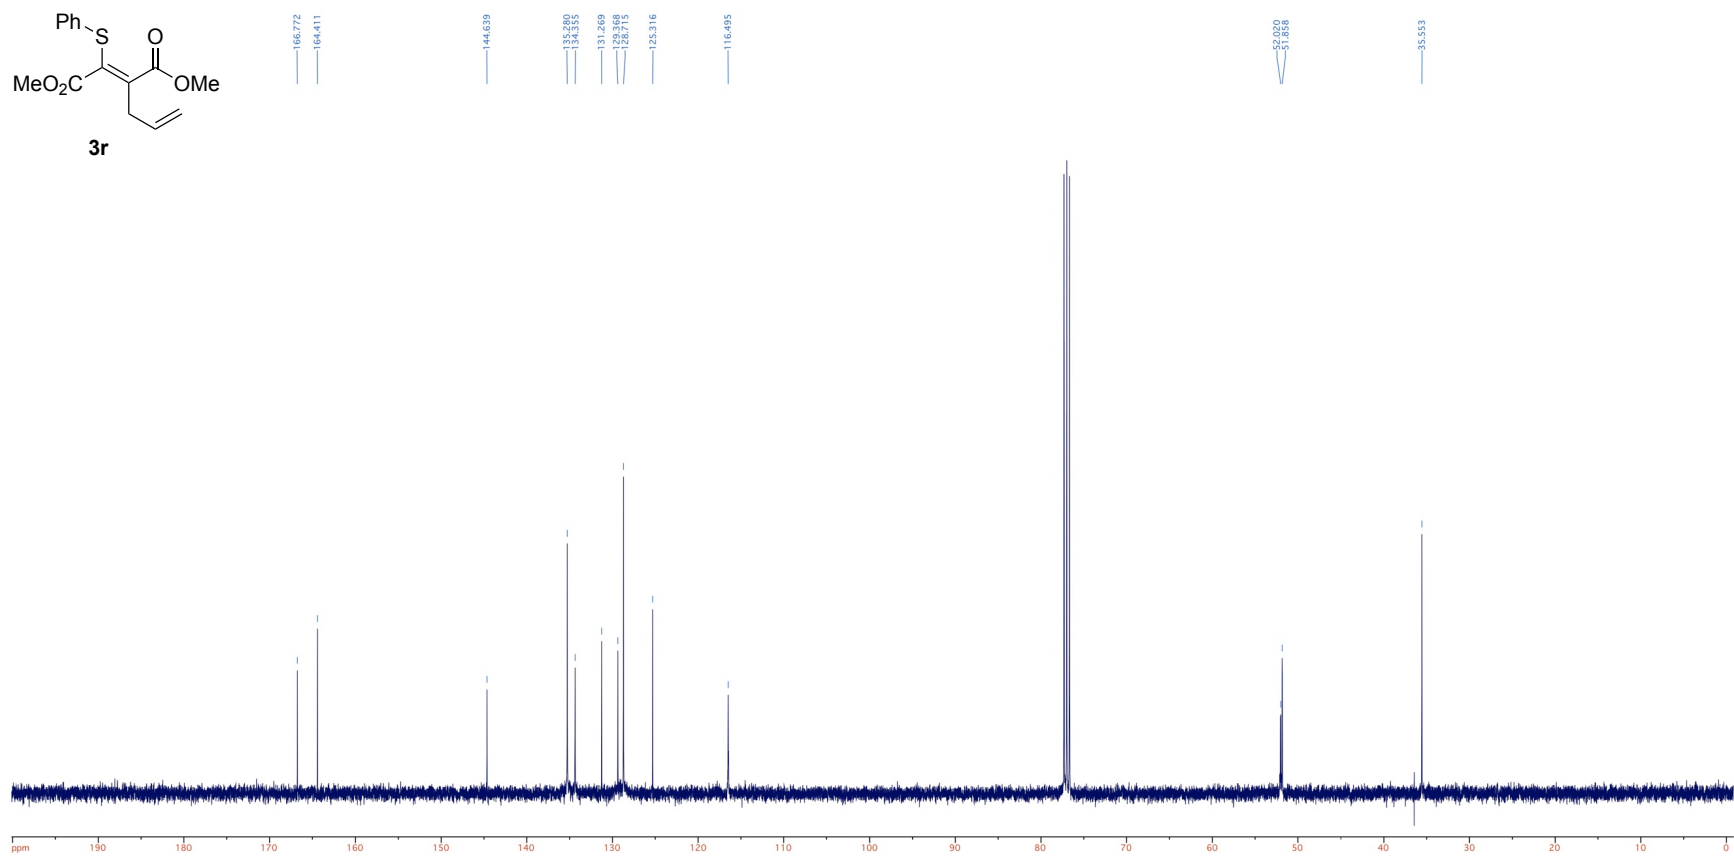

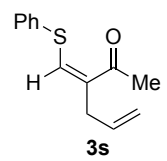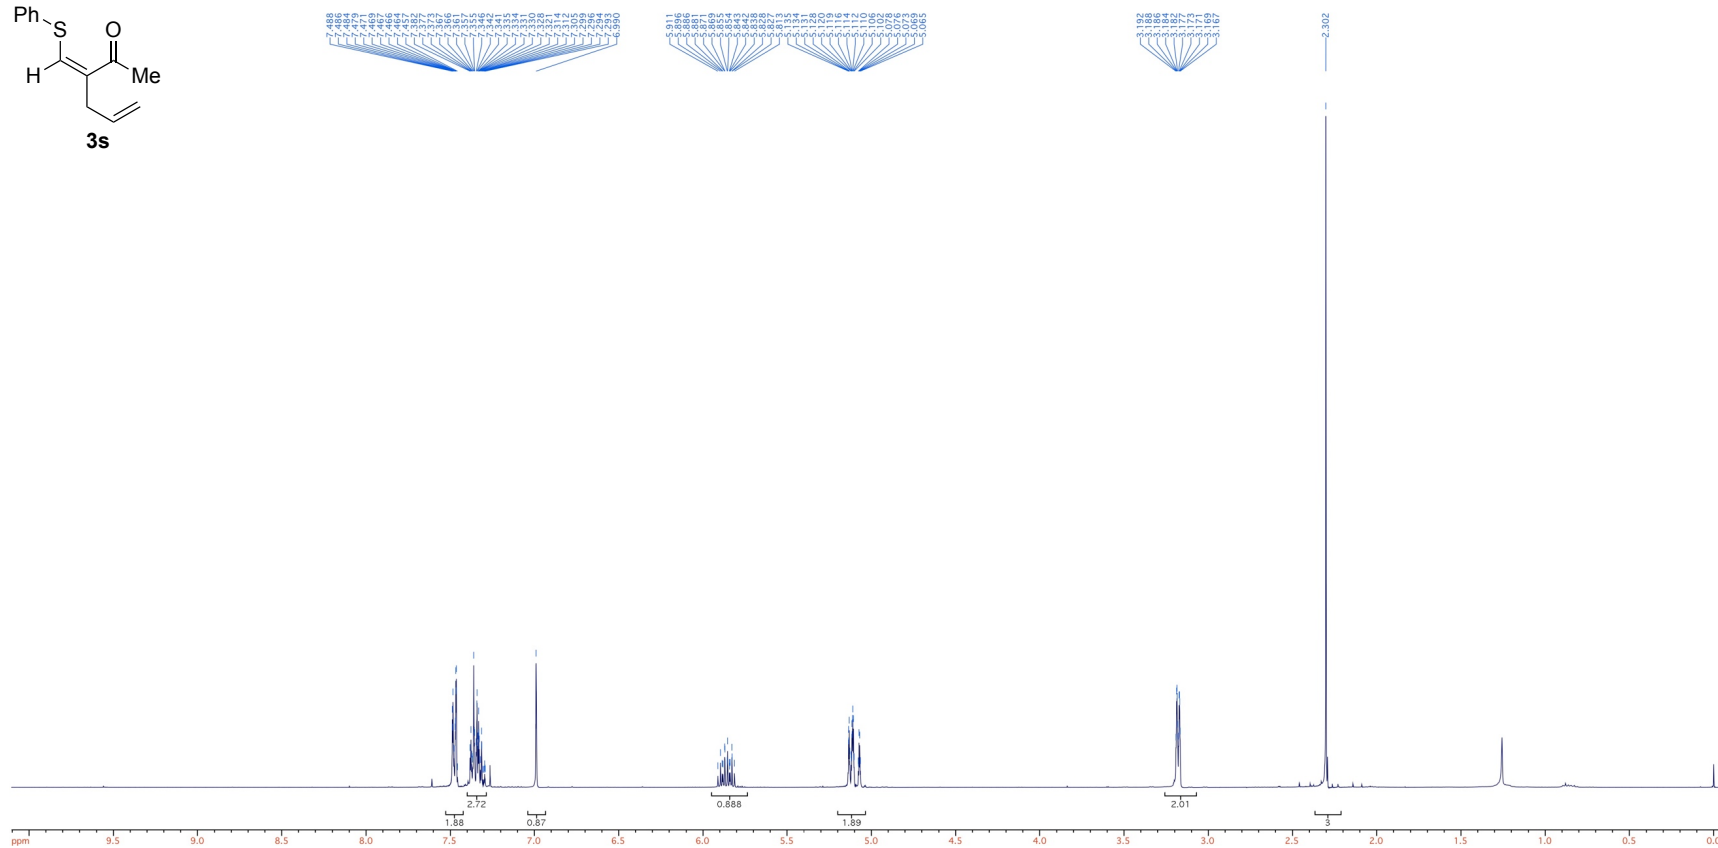

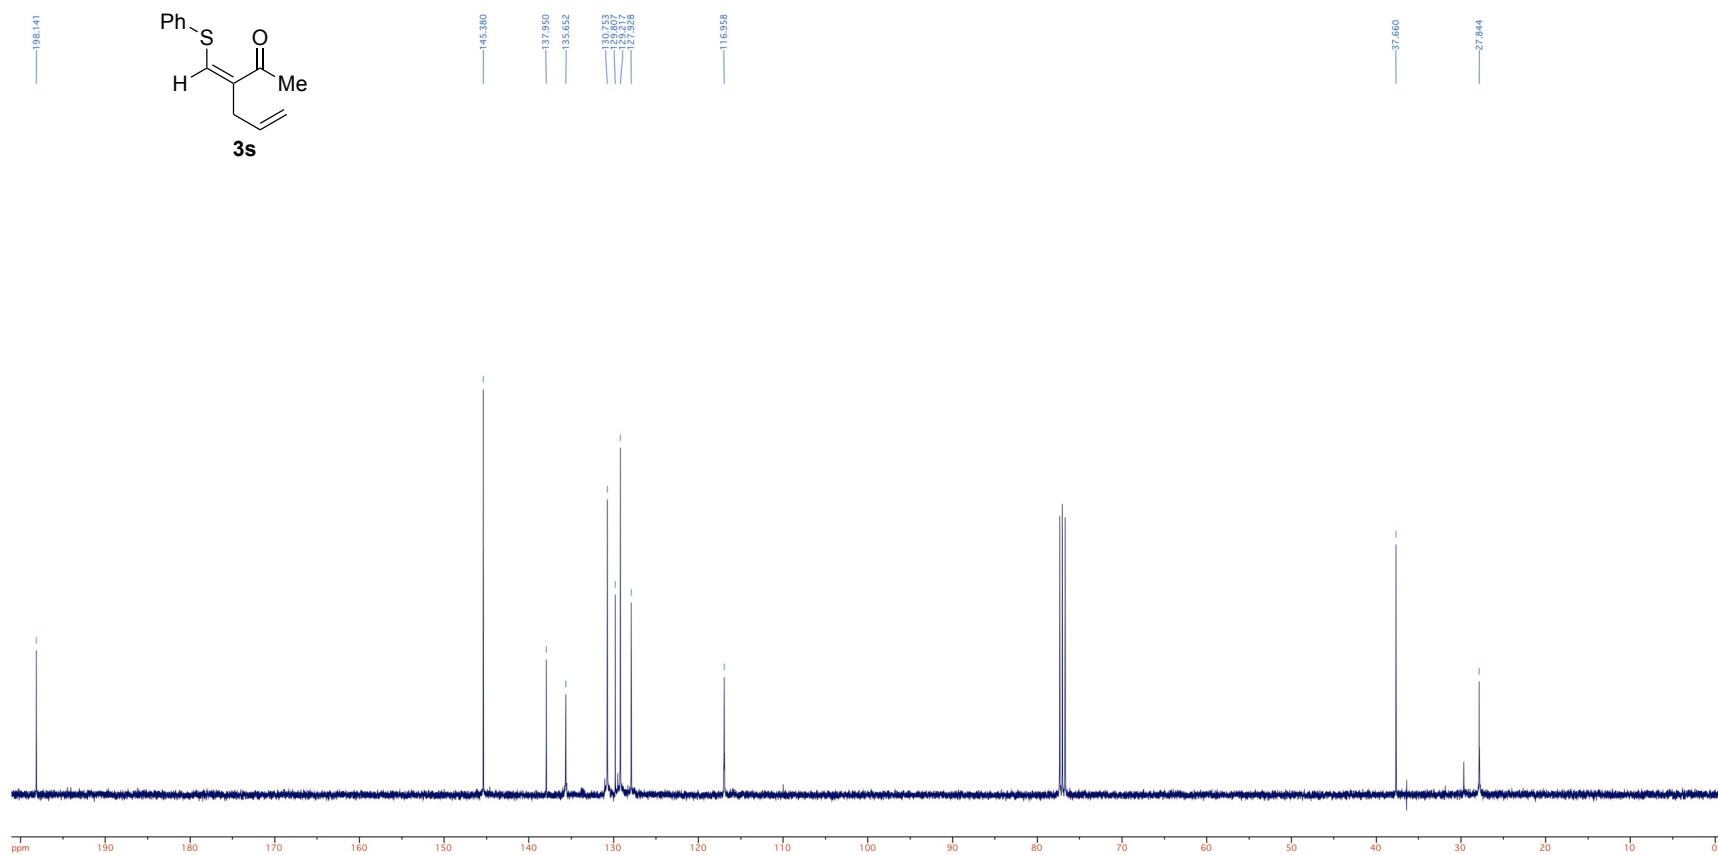

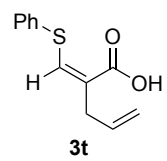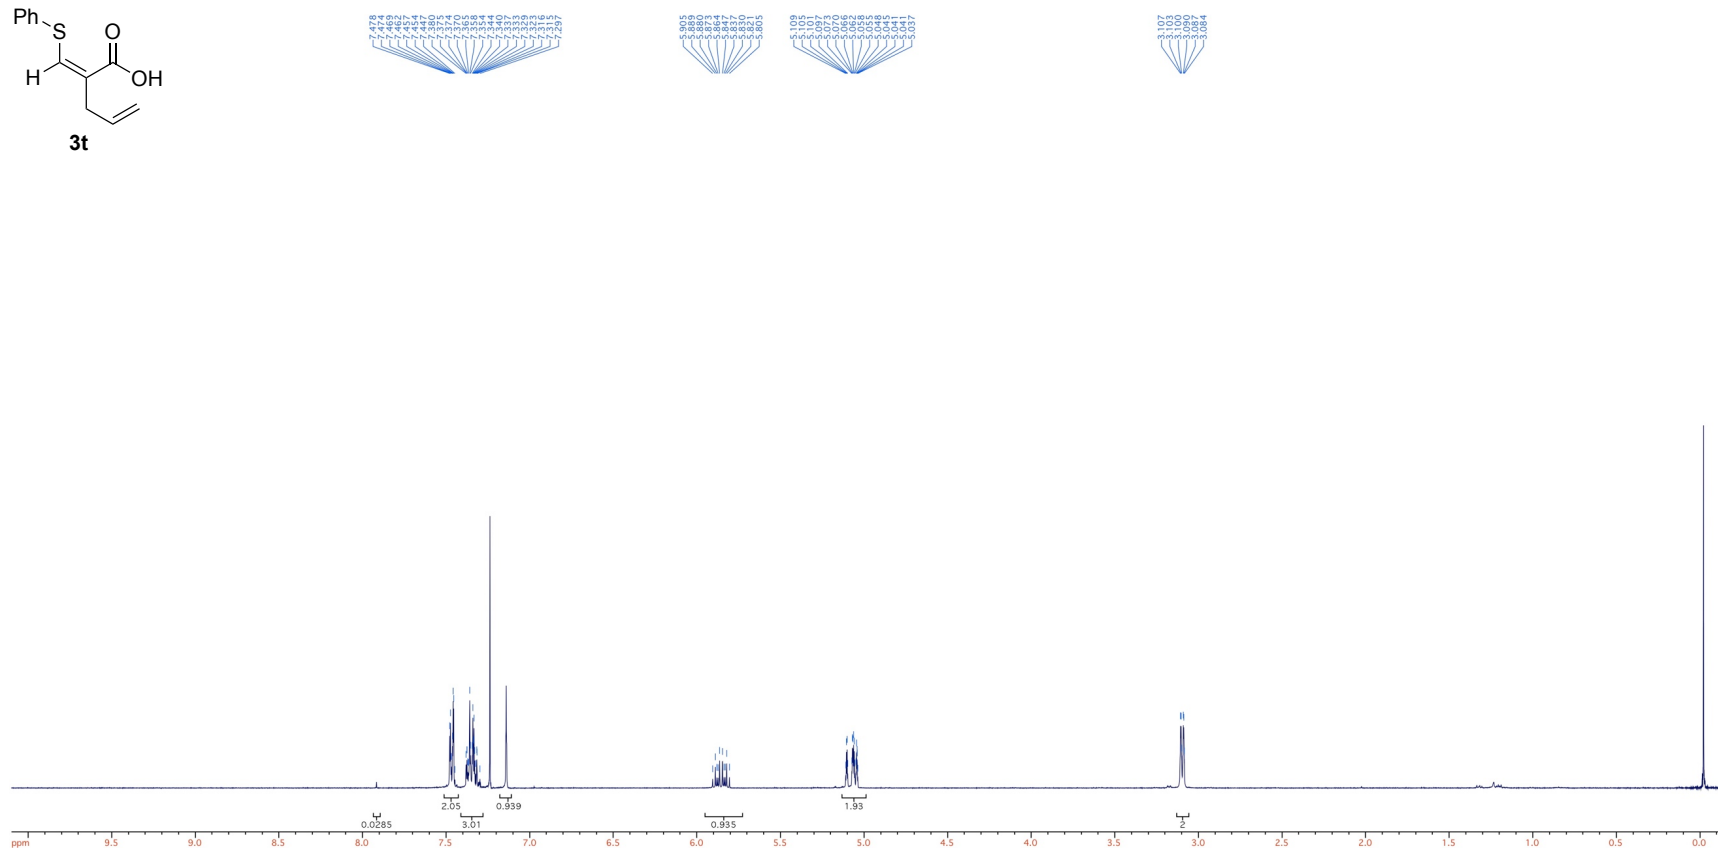

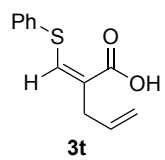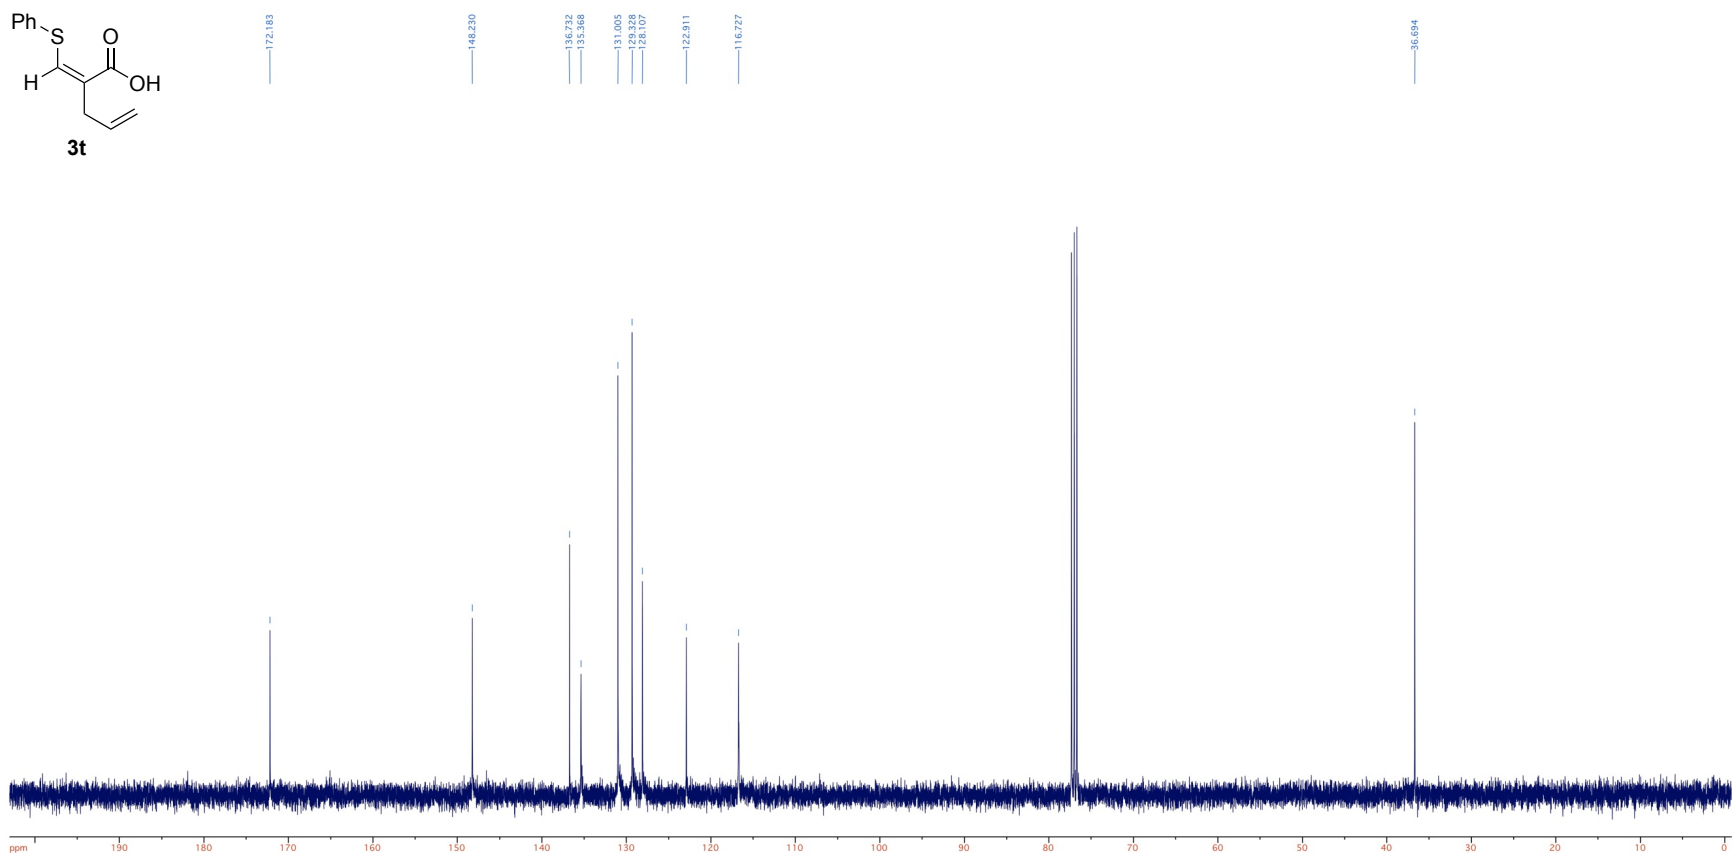

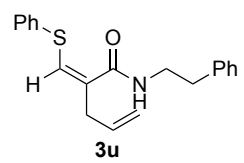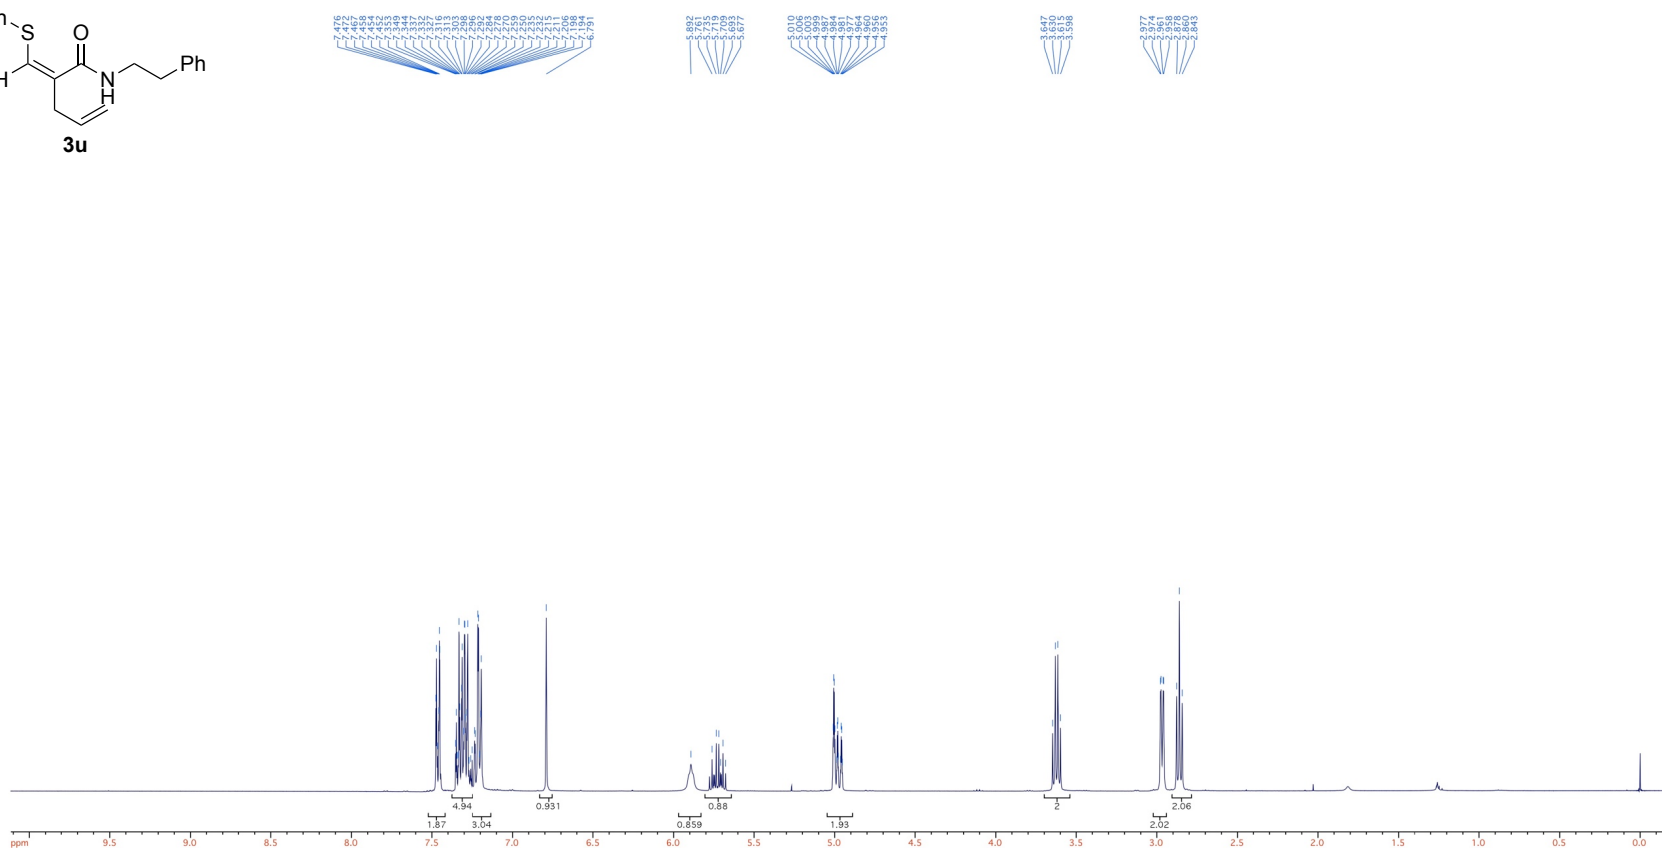

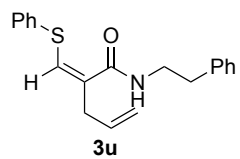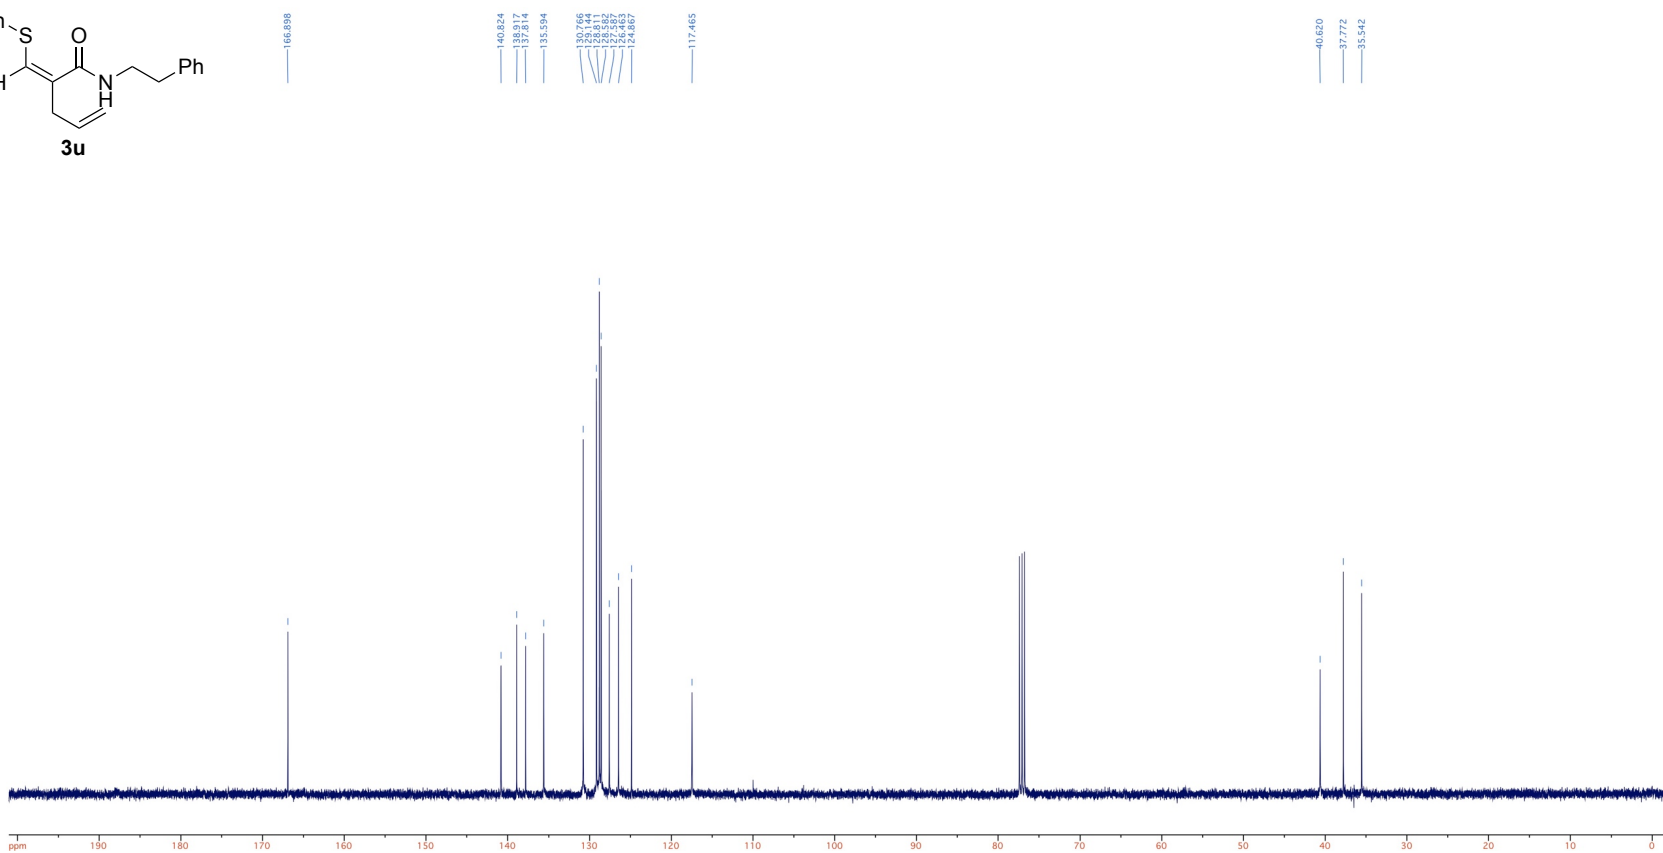

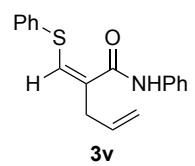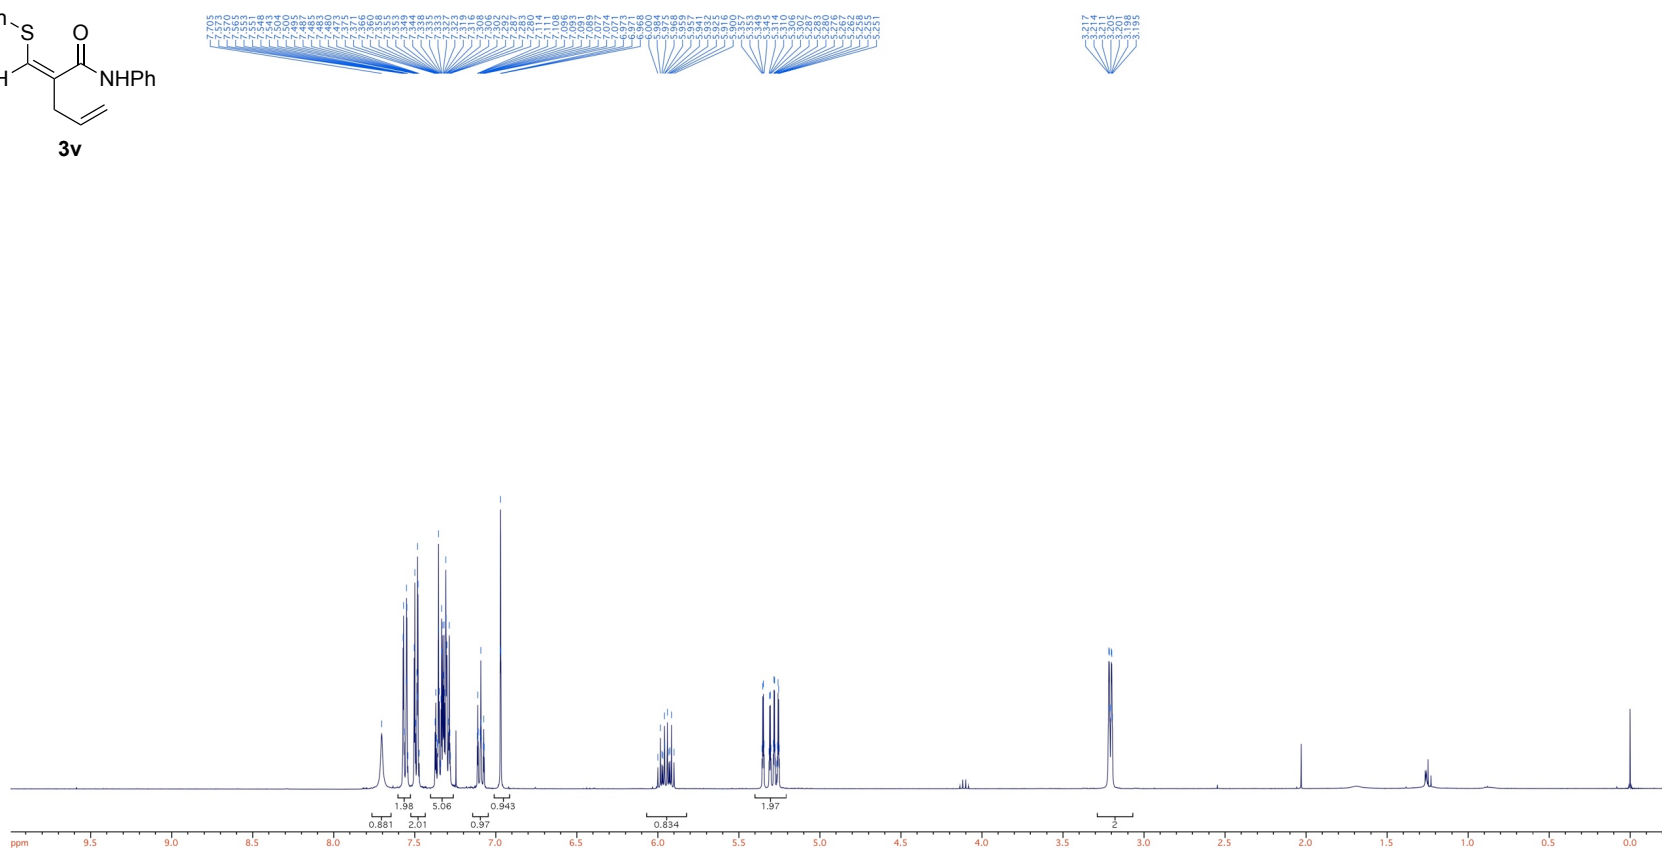



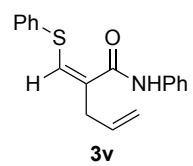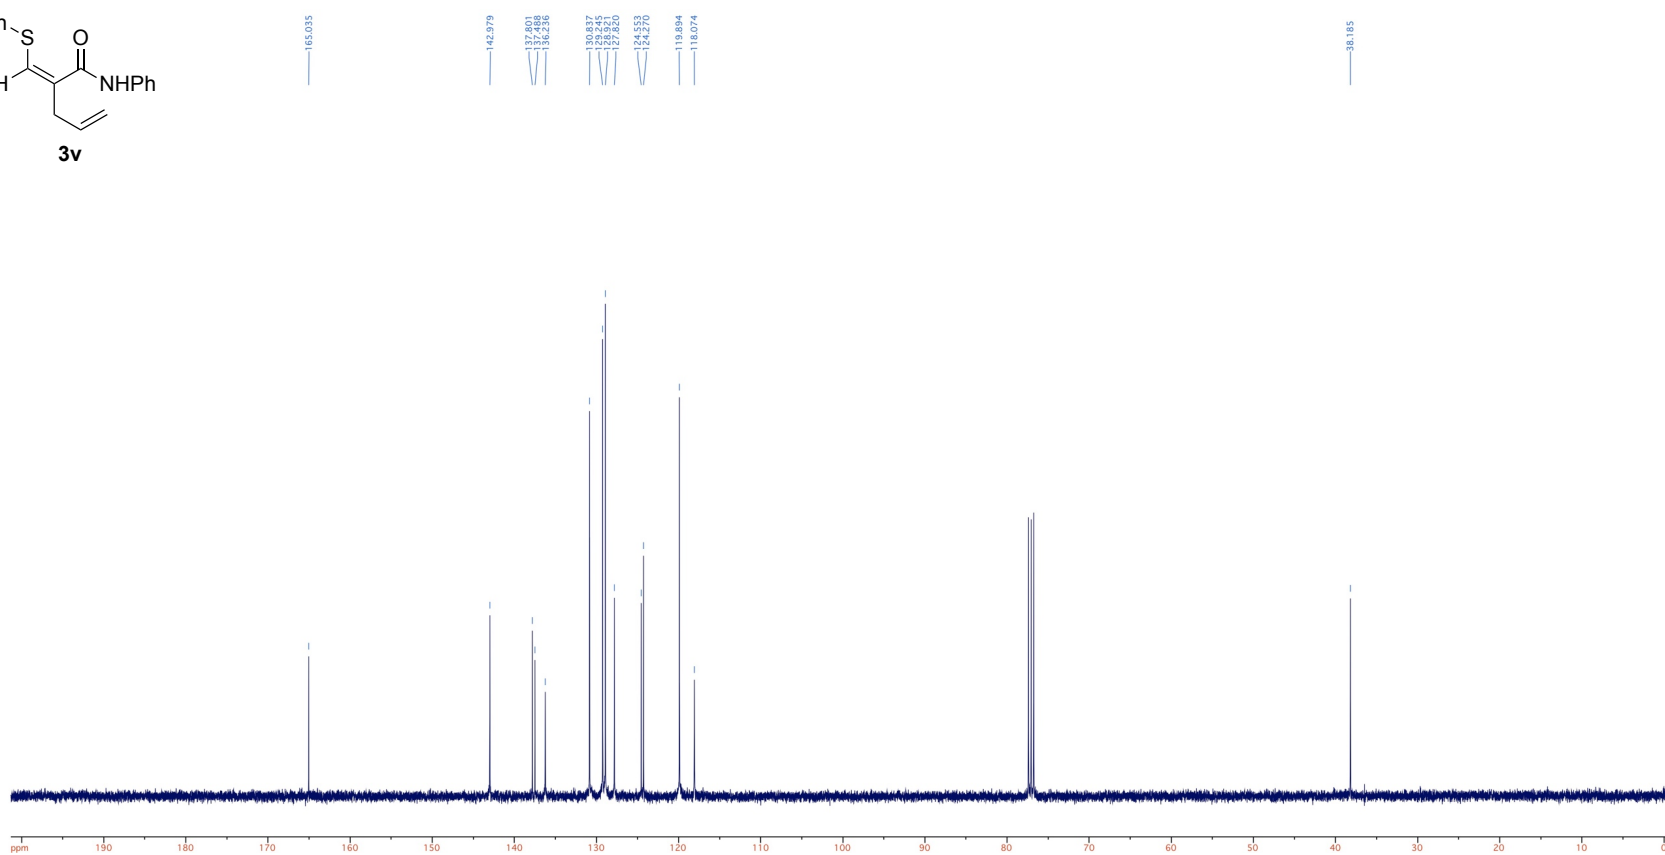

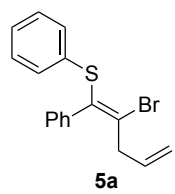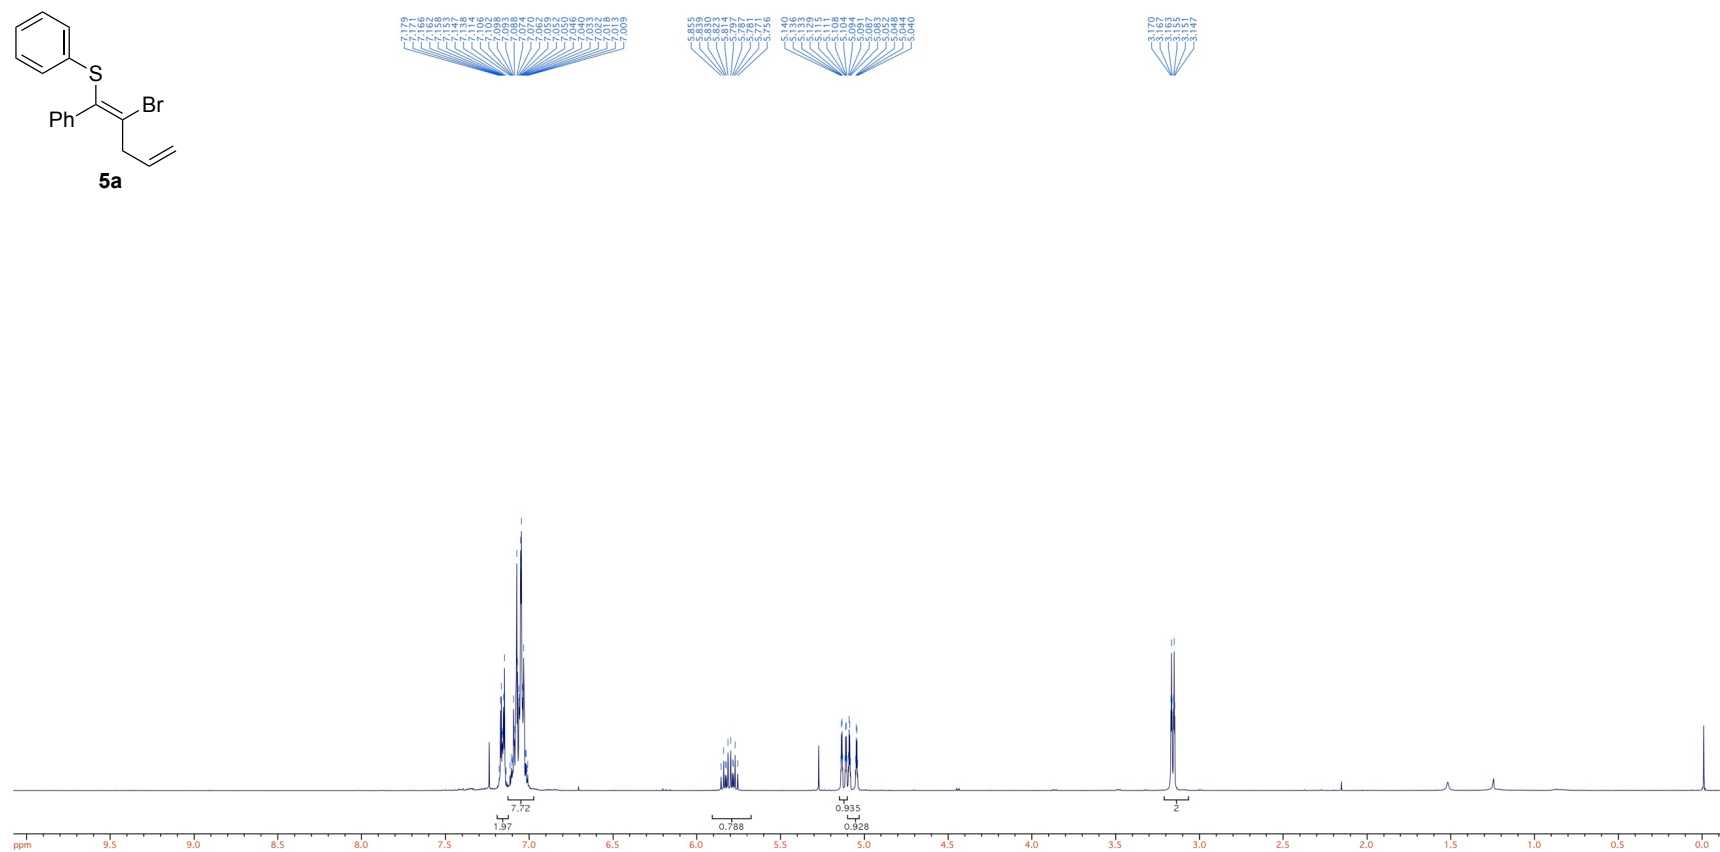

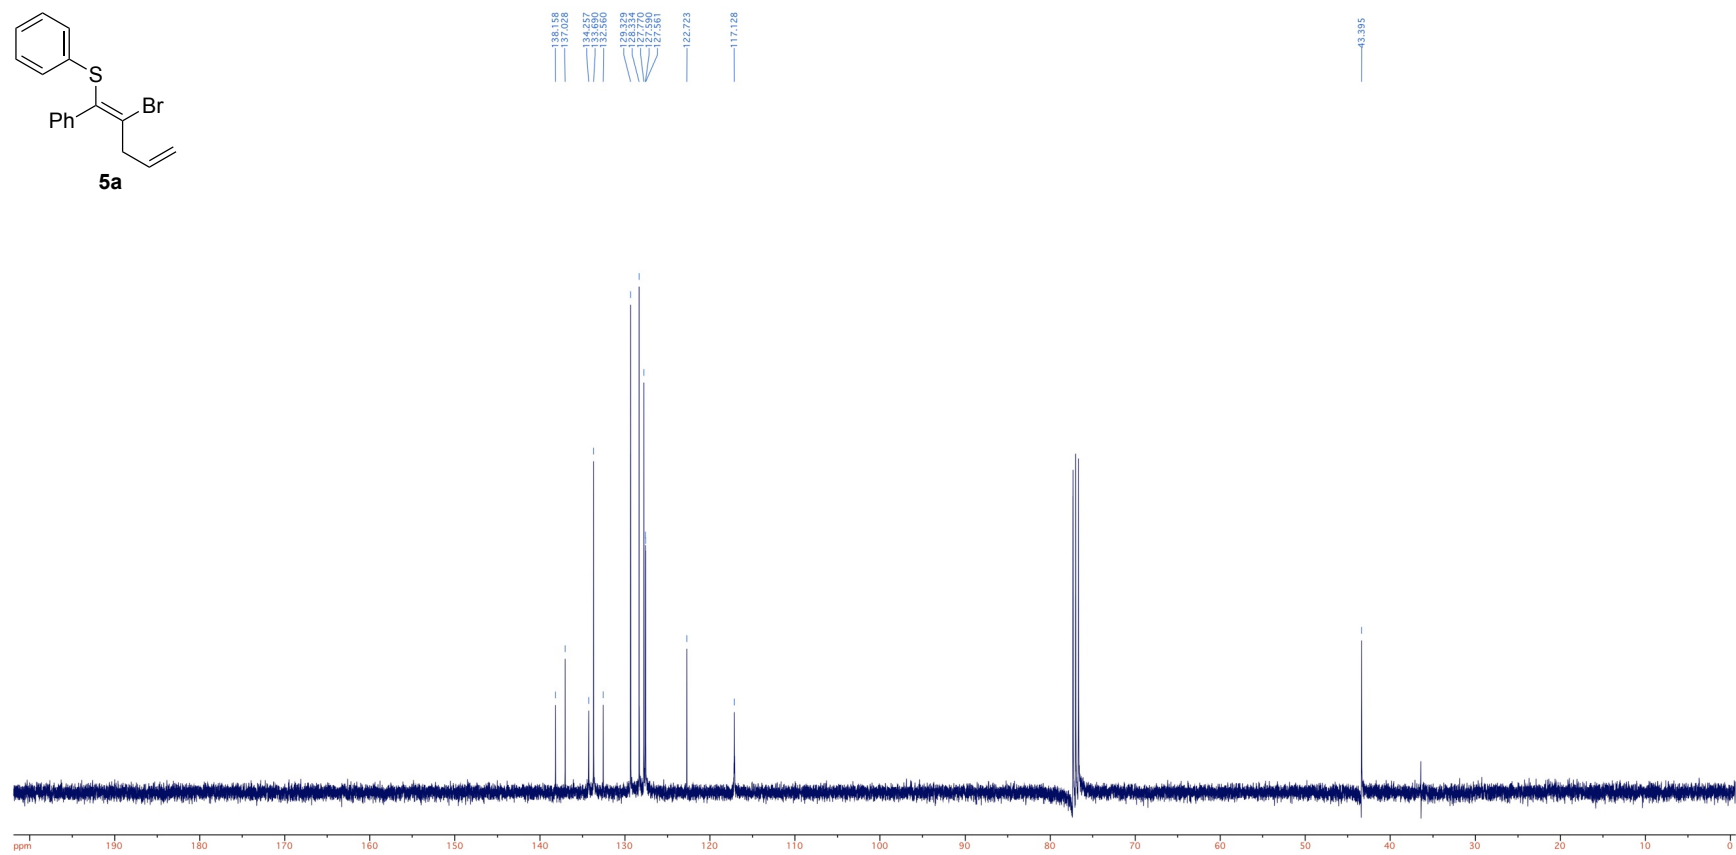



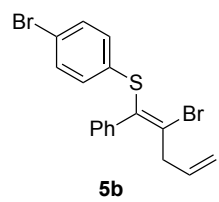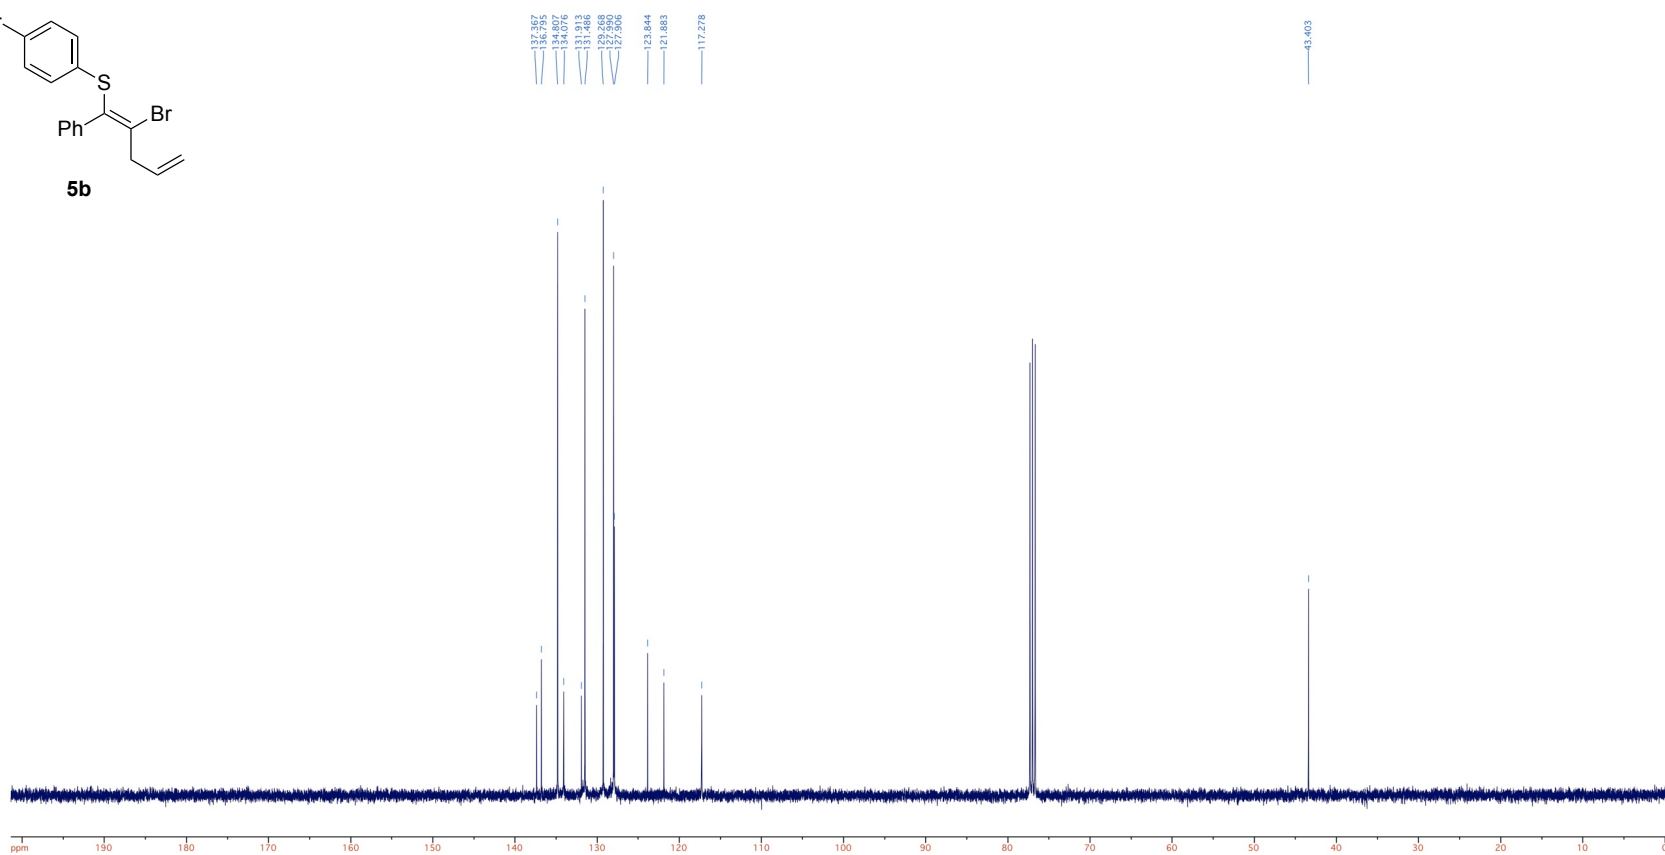

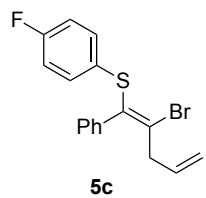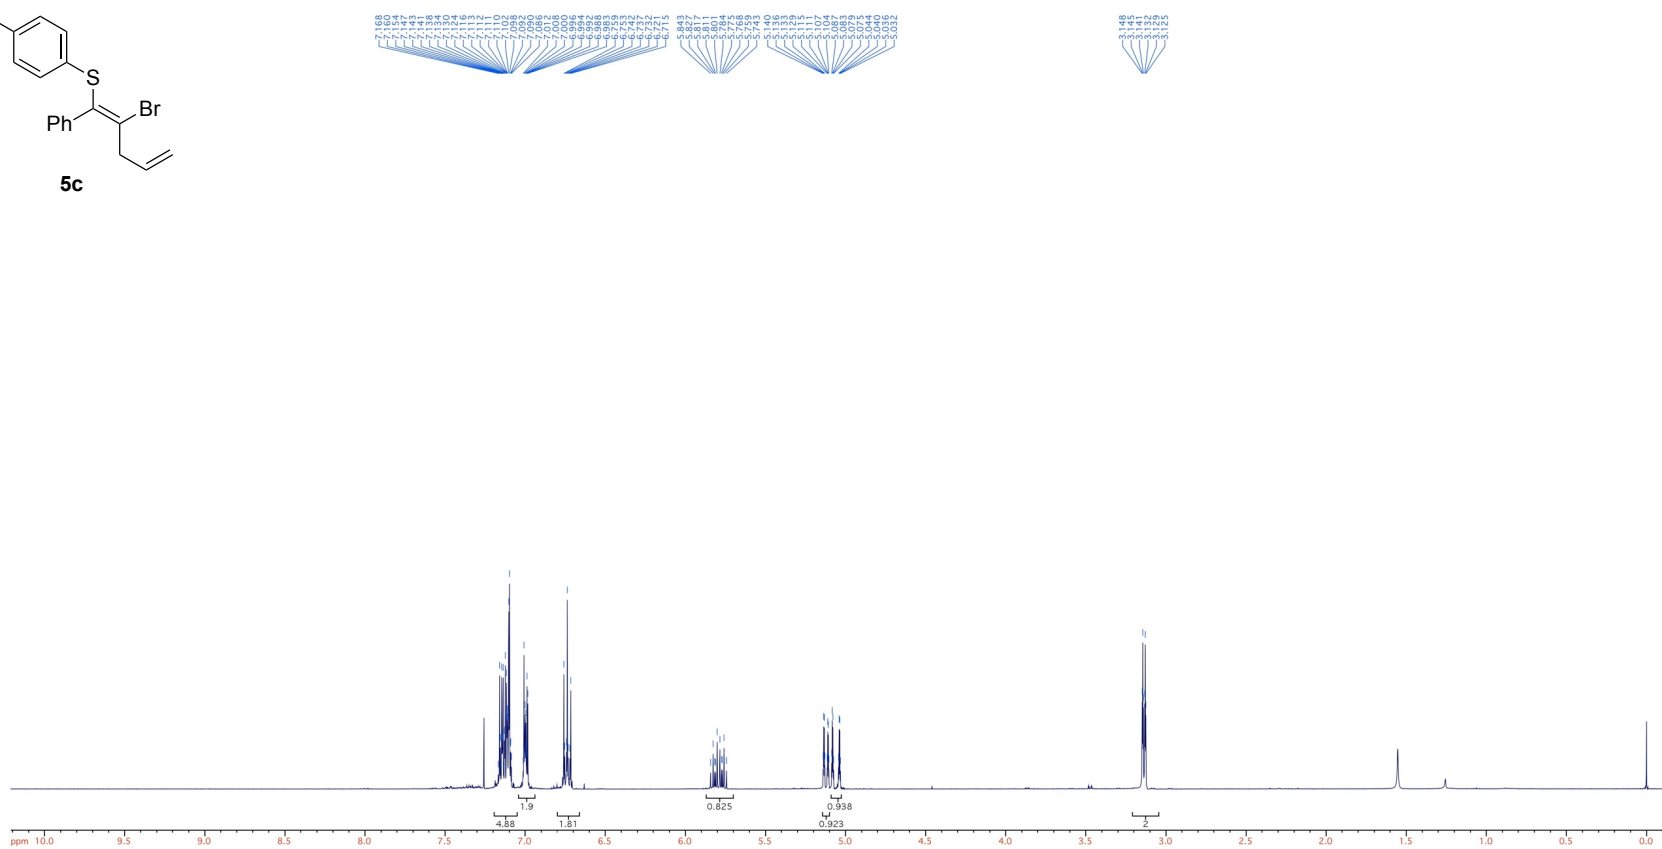

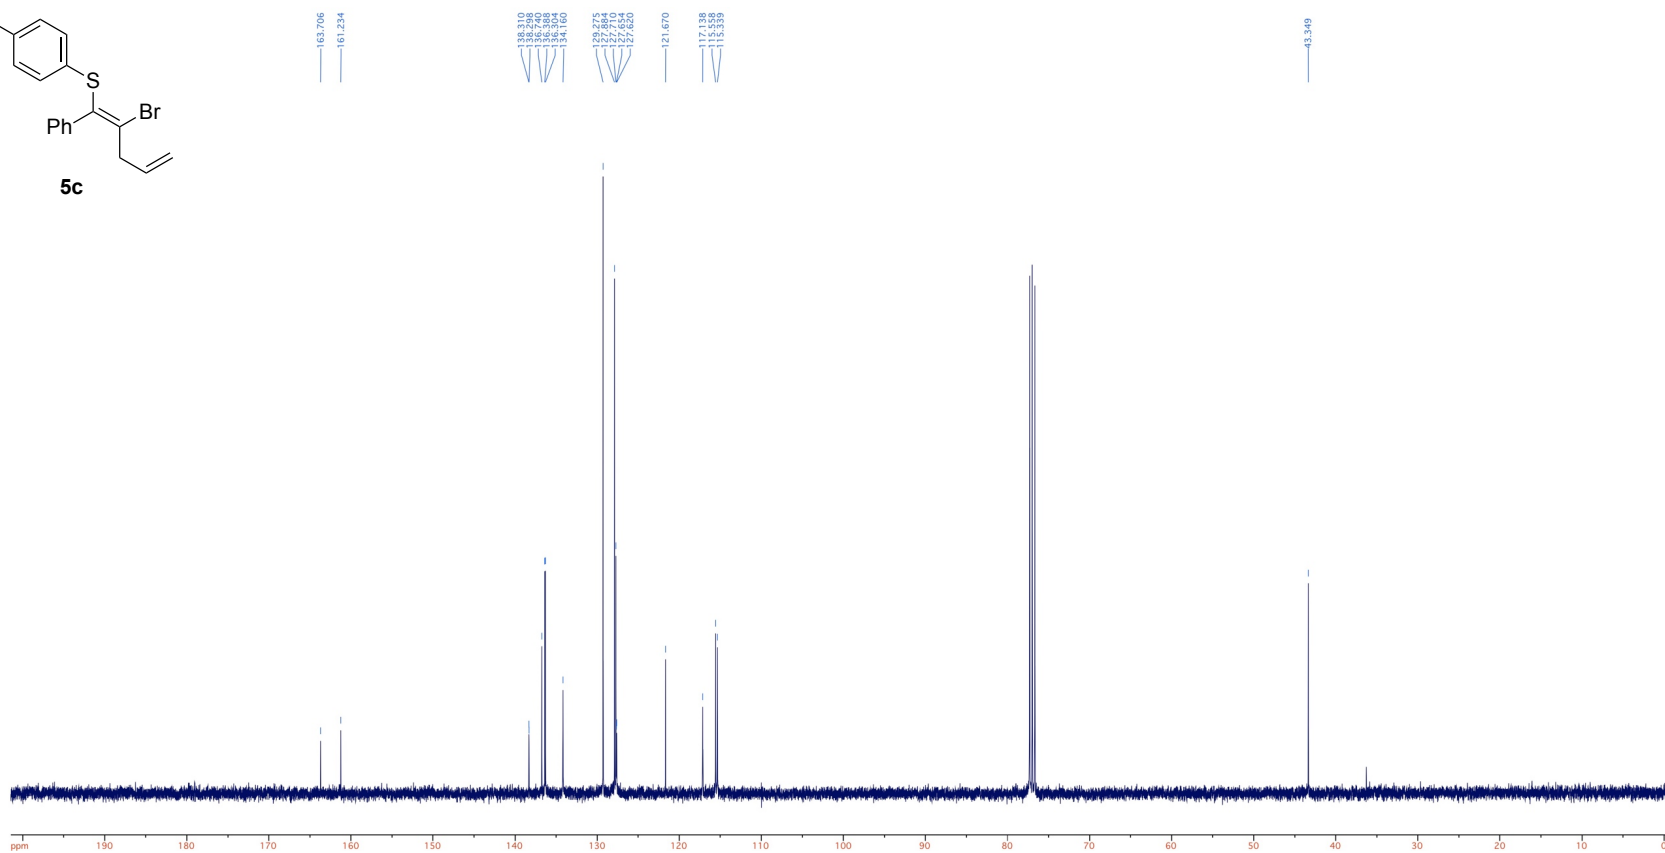

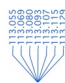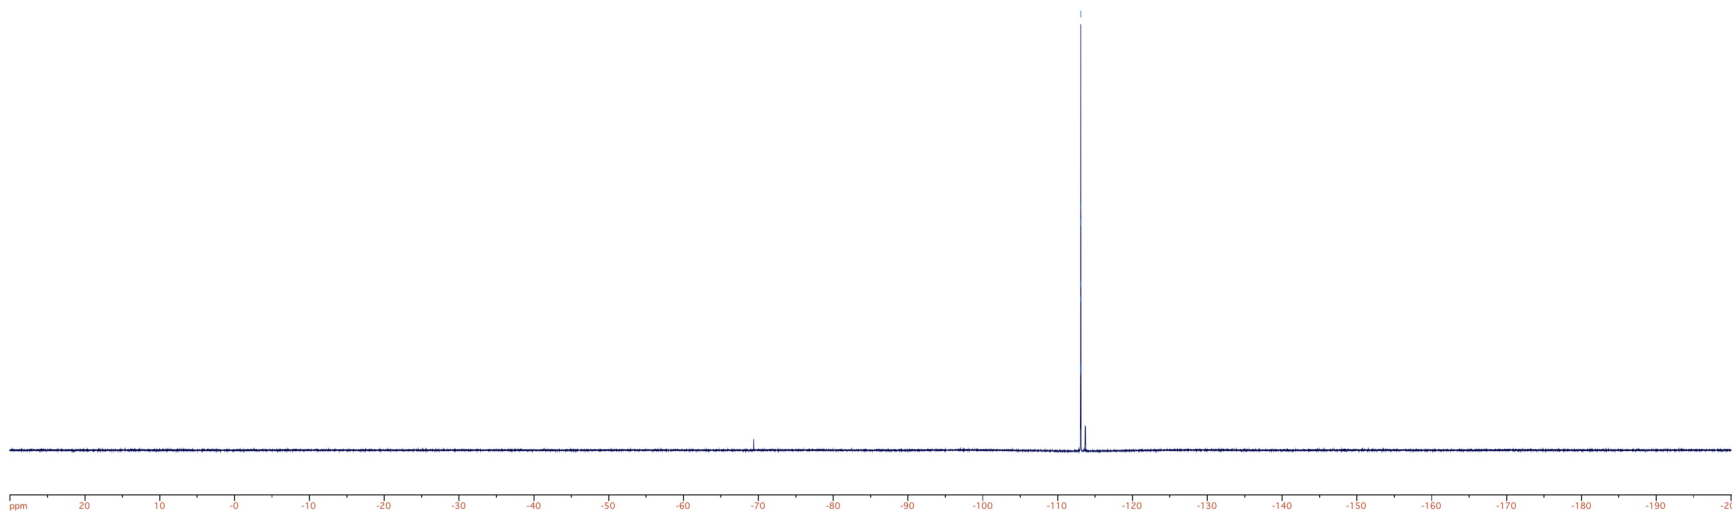



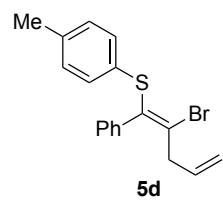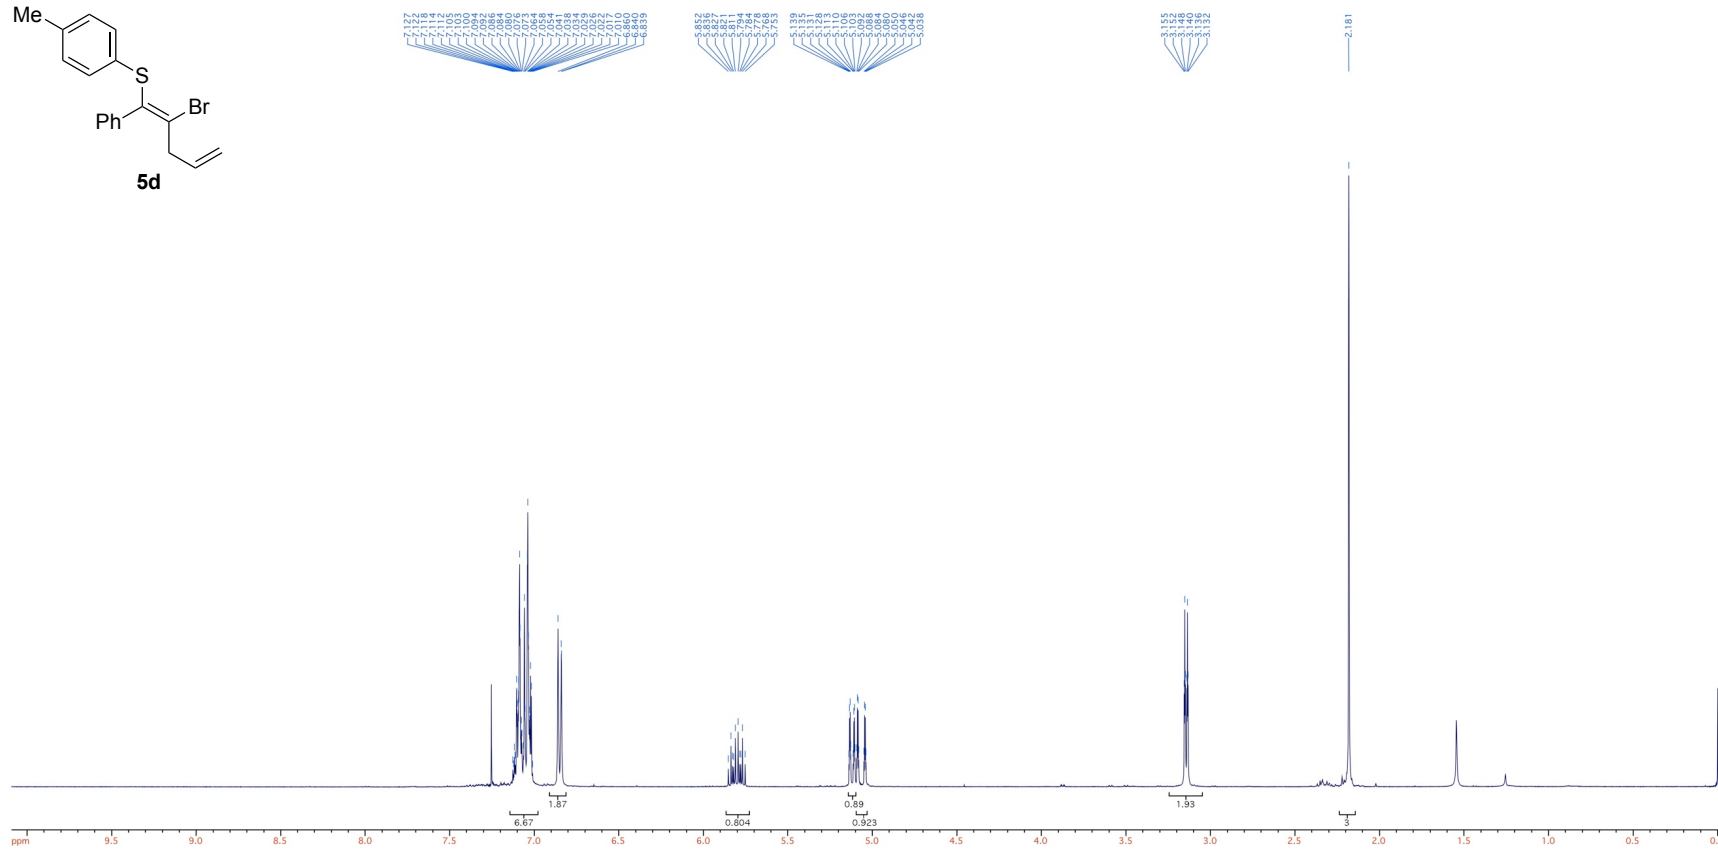

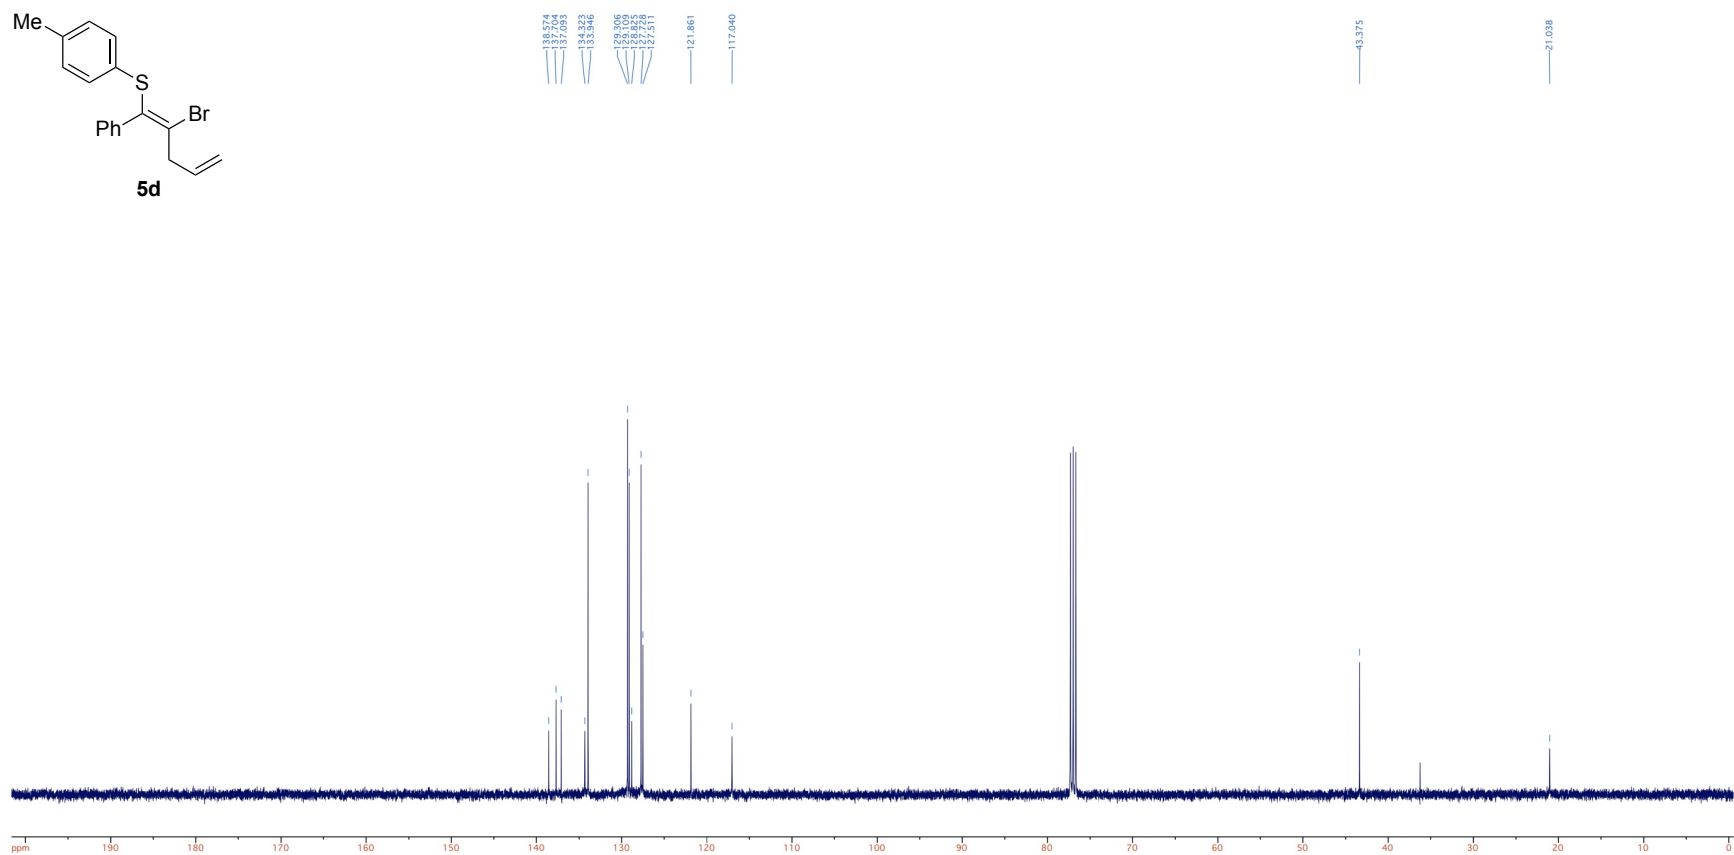

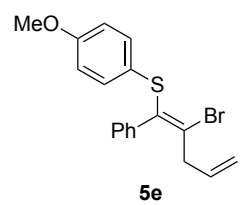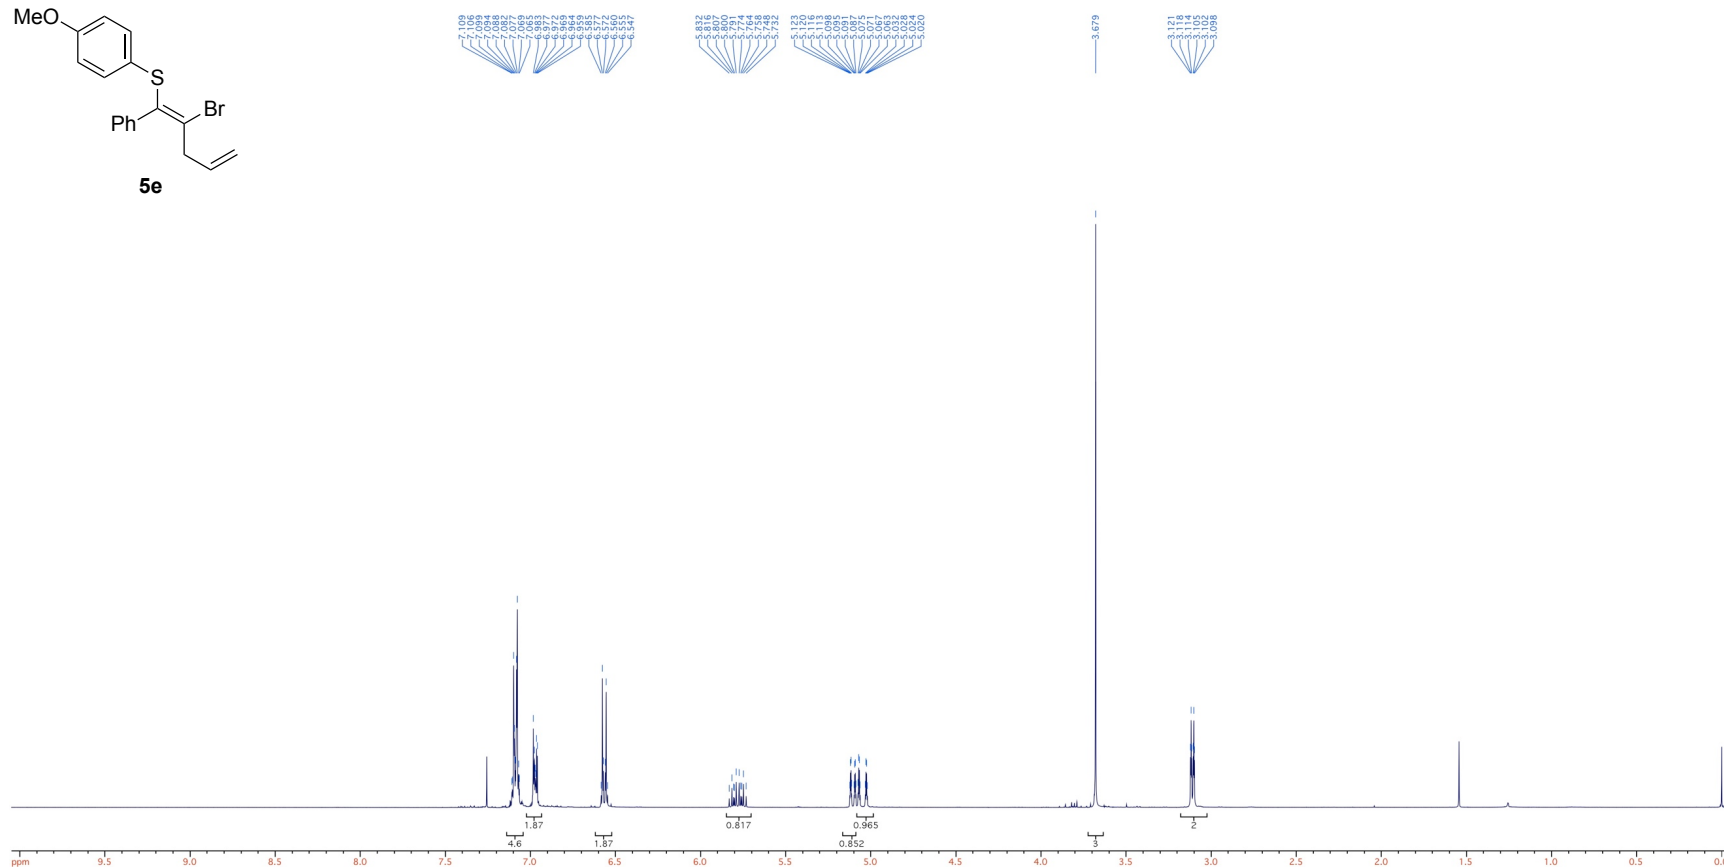

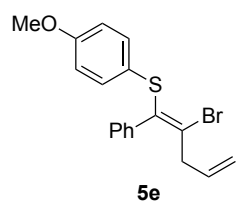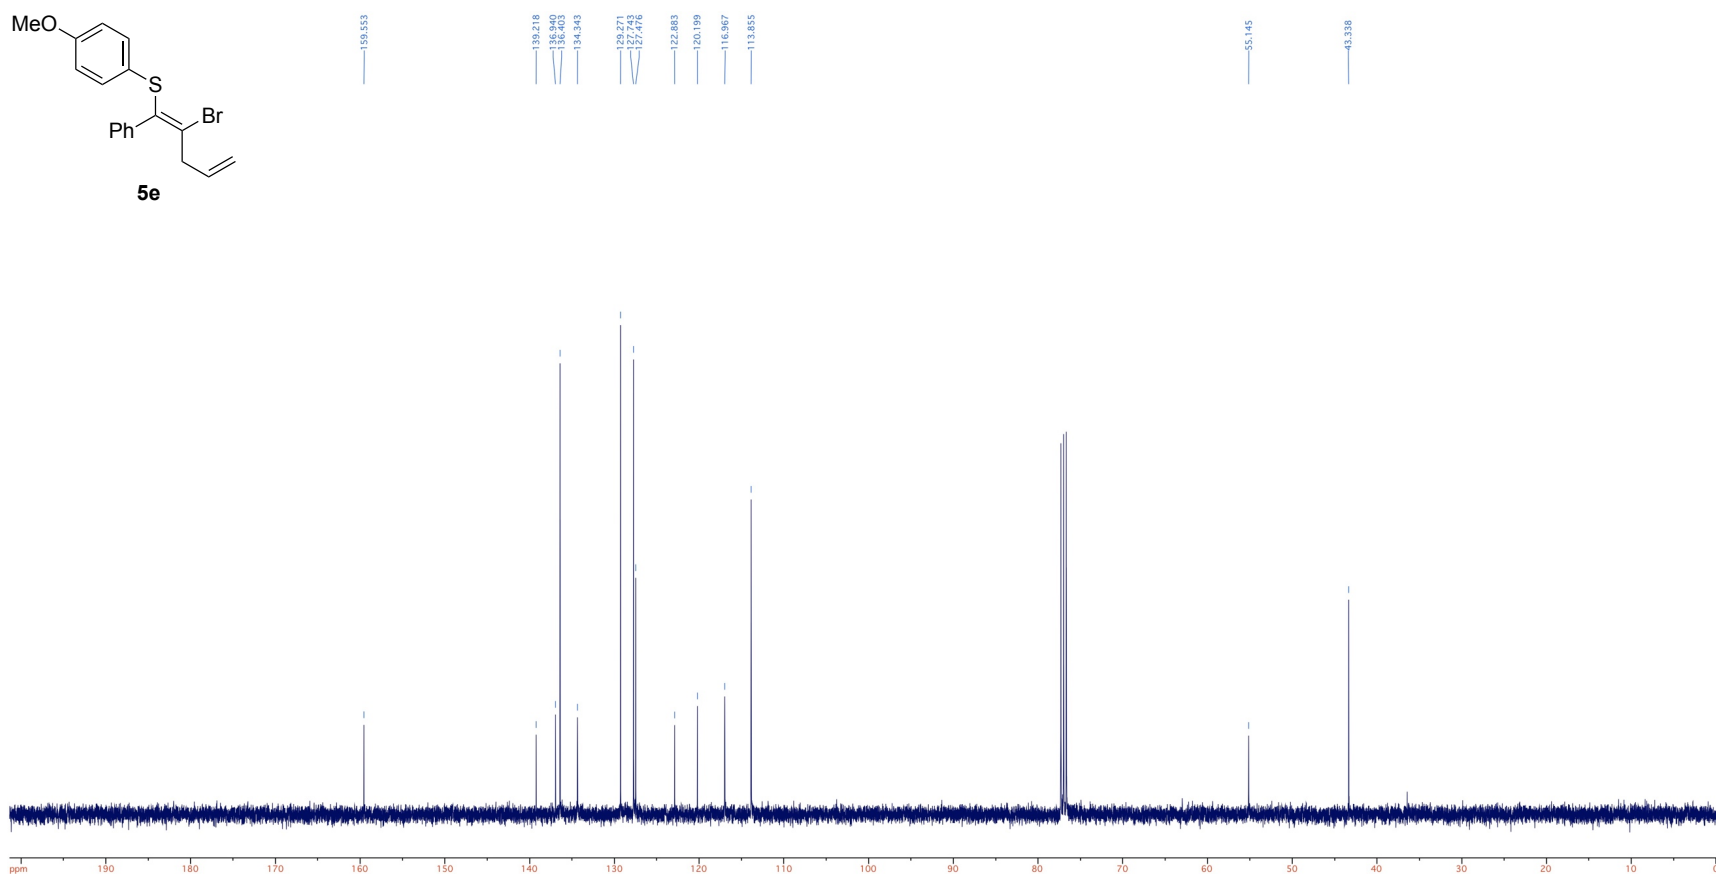



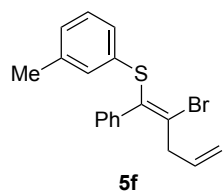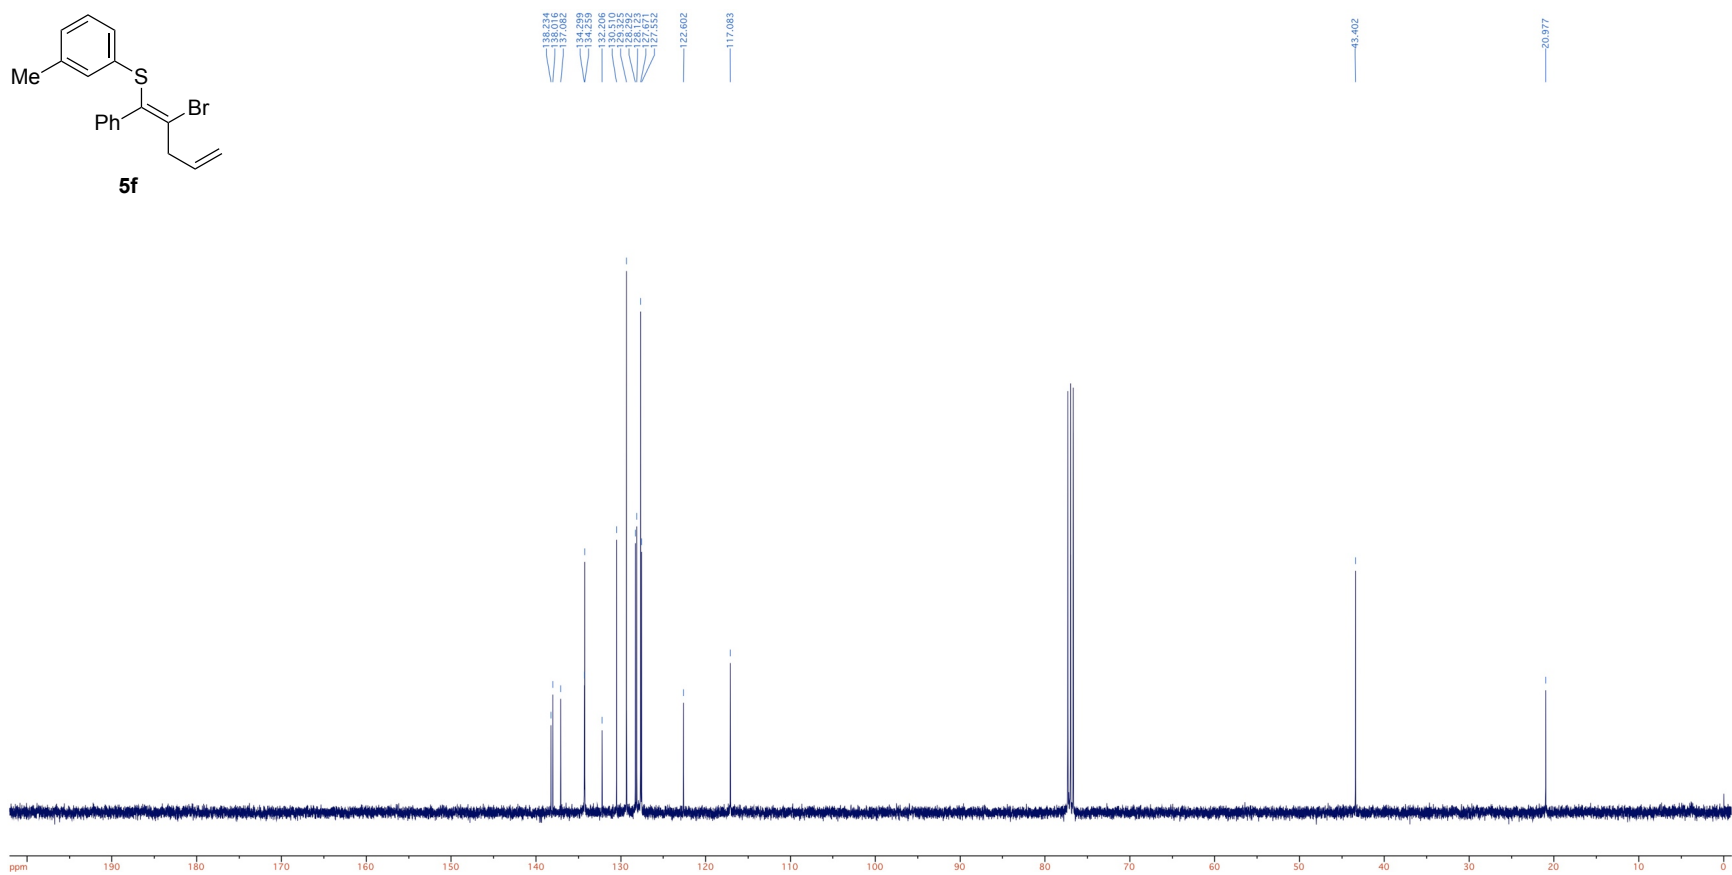

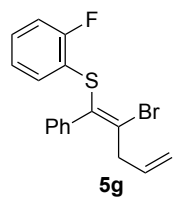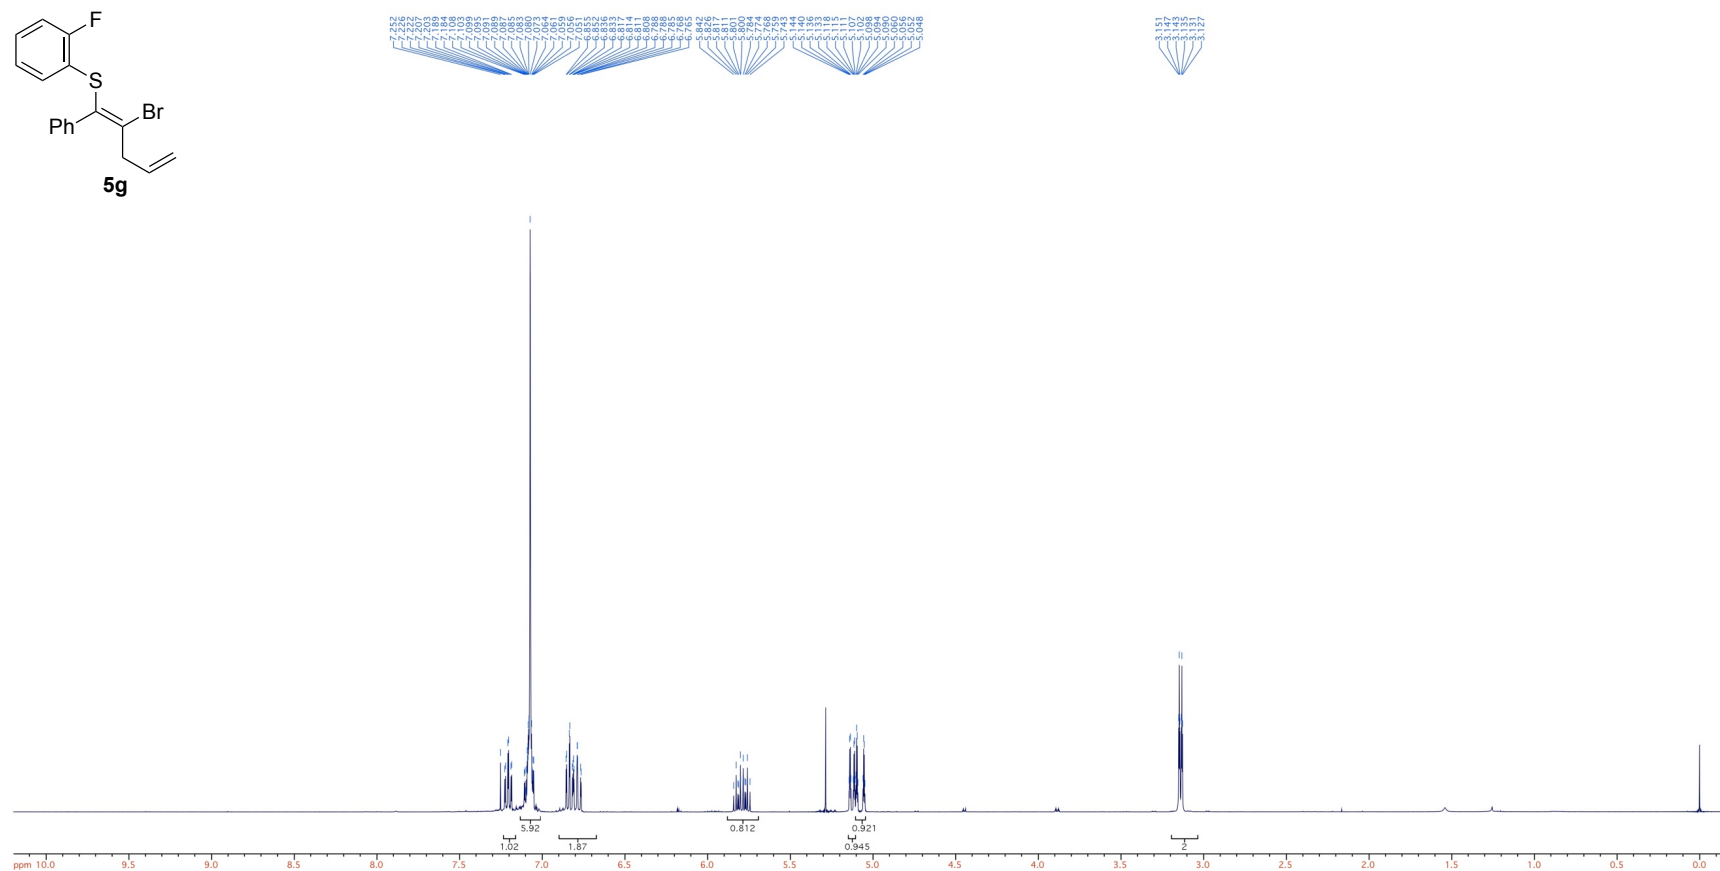

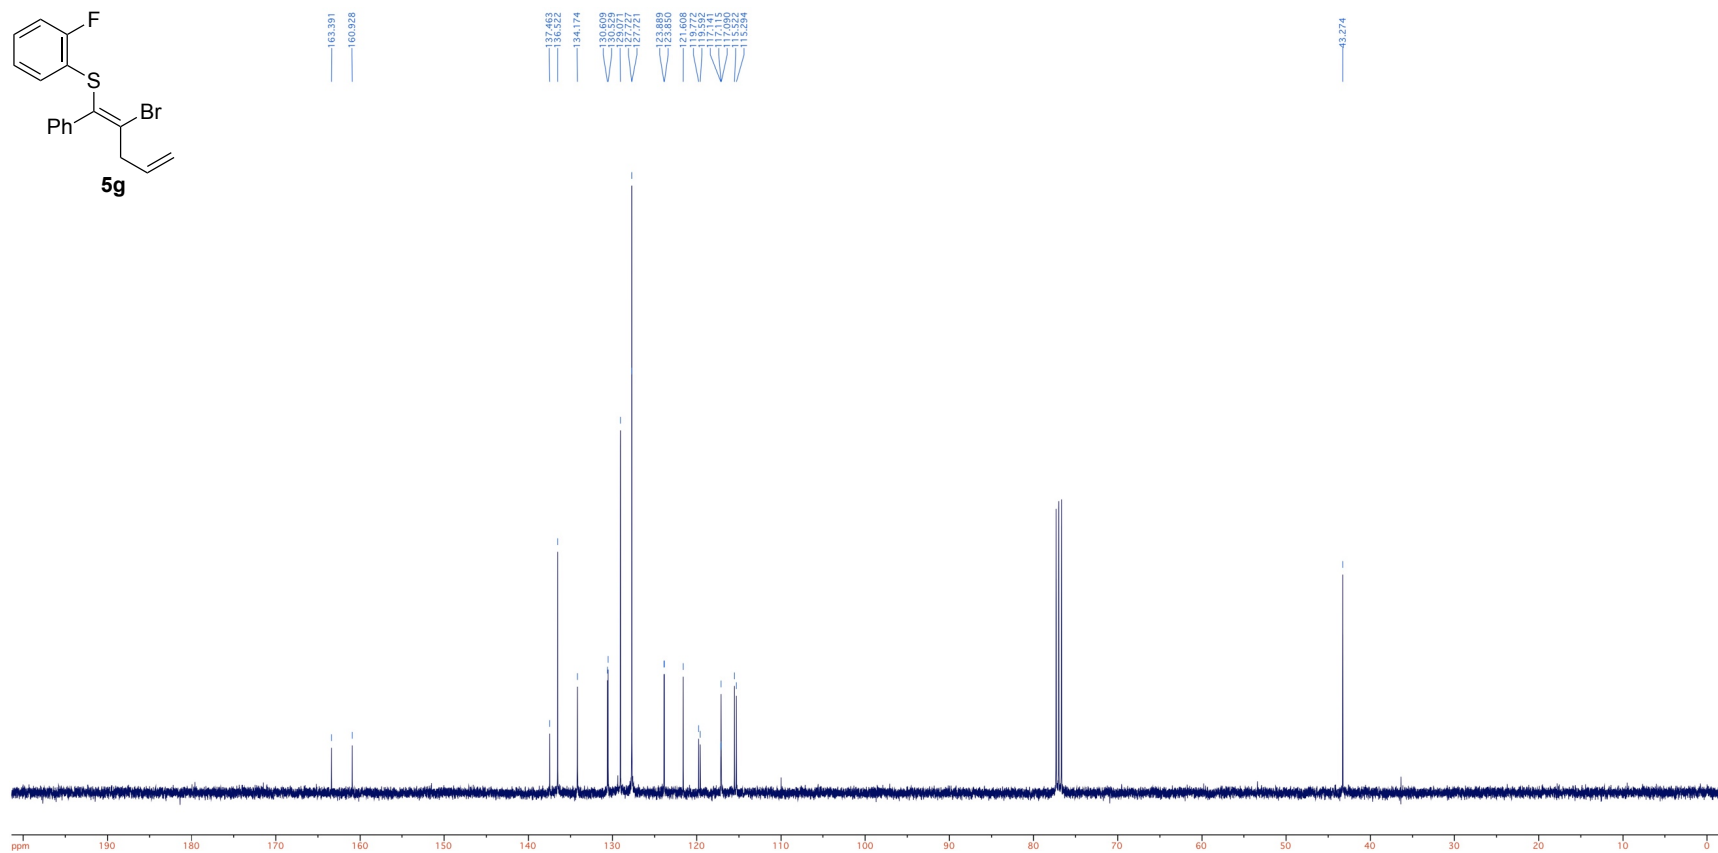





100.00  
100.00  
100.00  
100.00  
100.00  
100.00  
100.00  
100.00  
100.00  
100.00

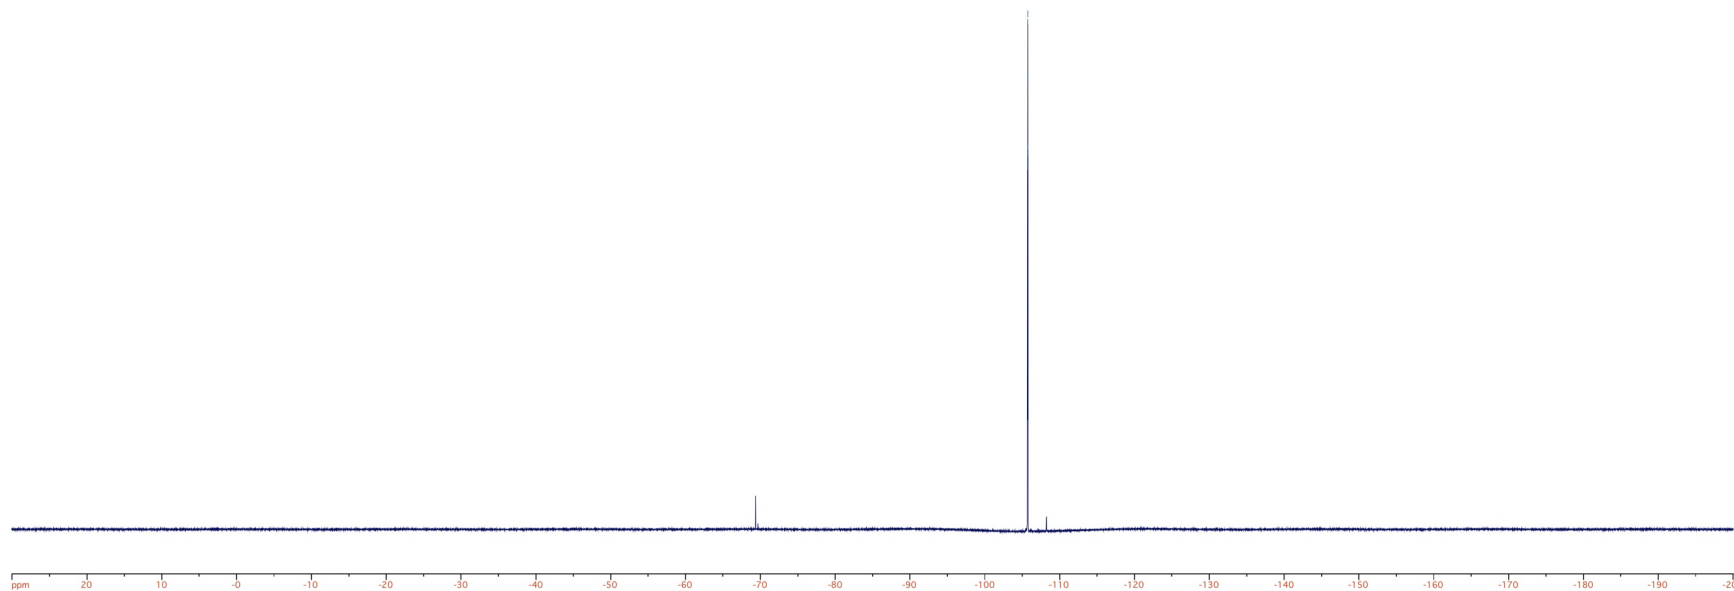

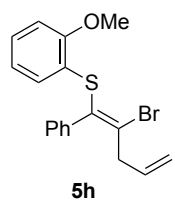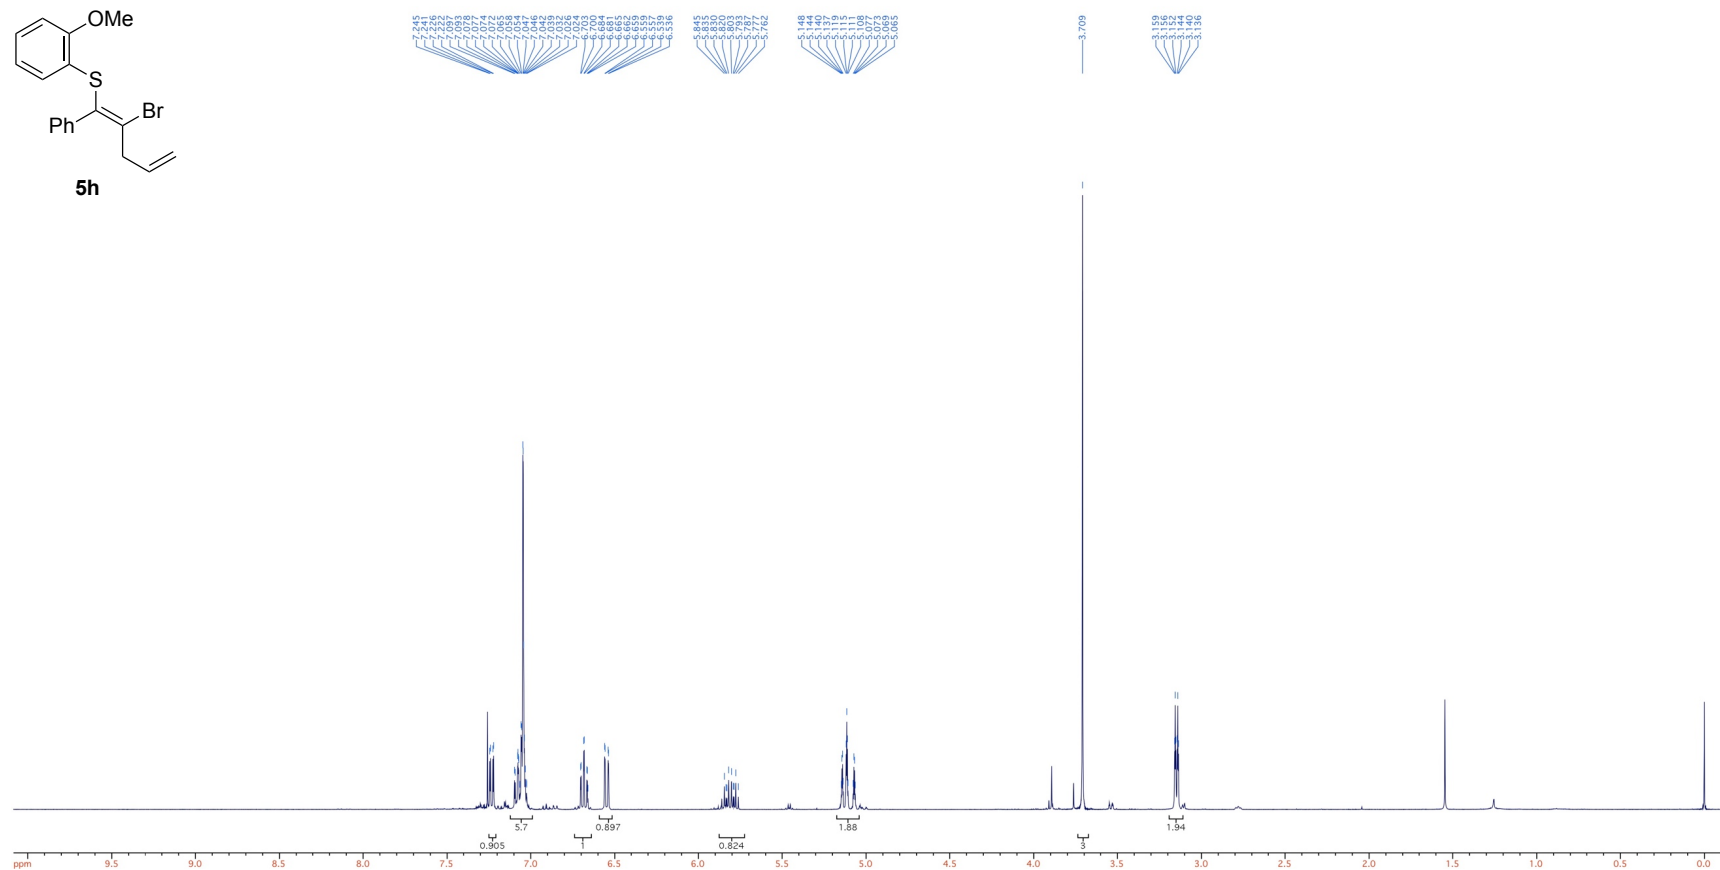

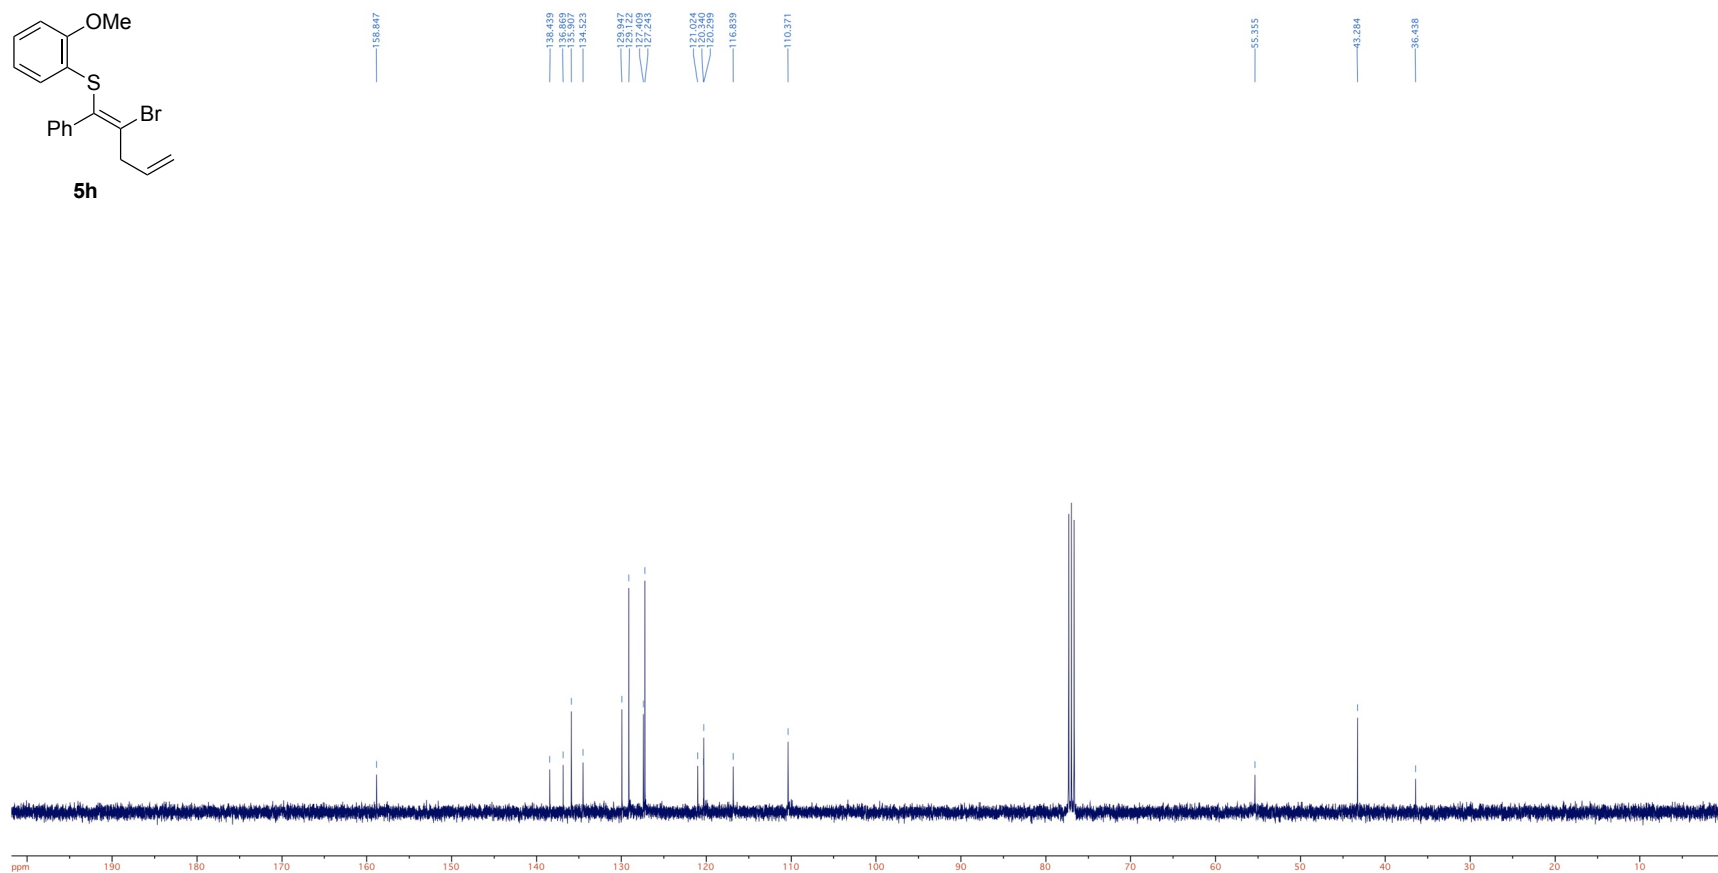

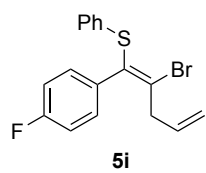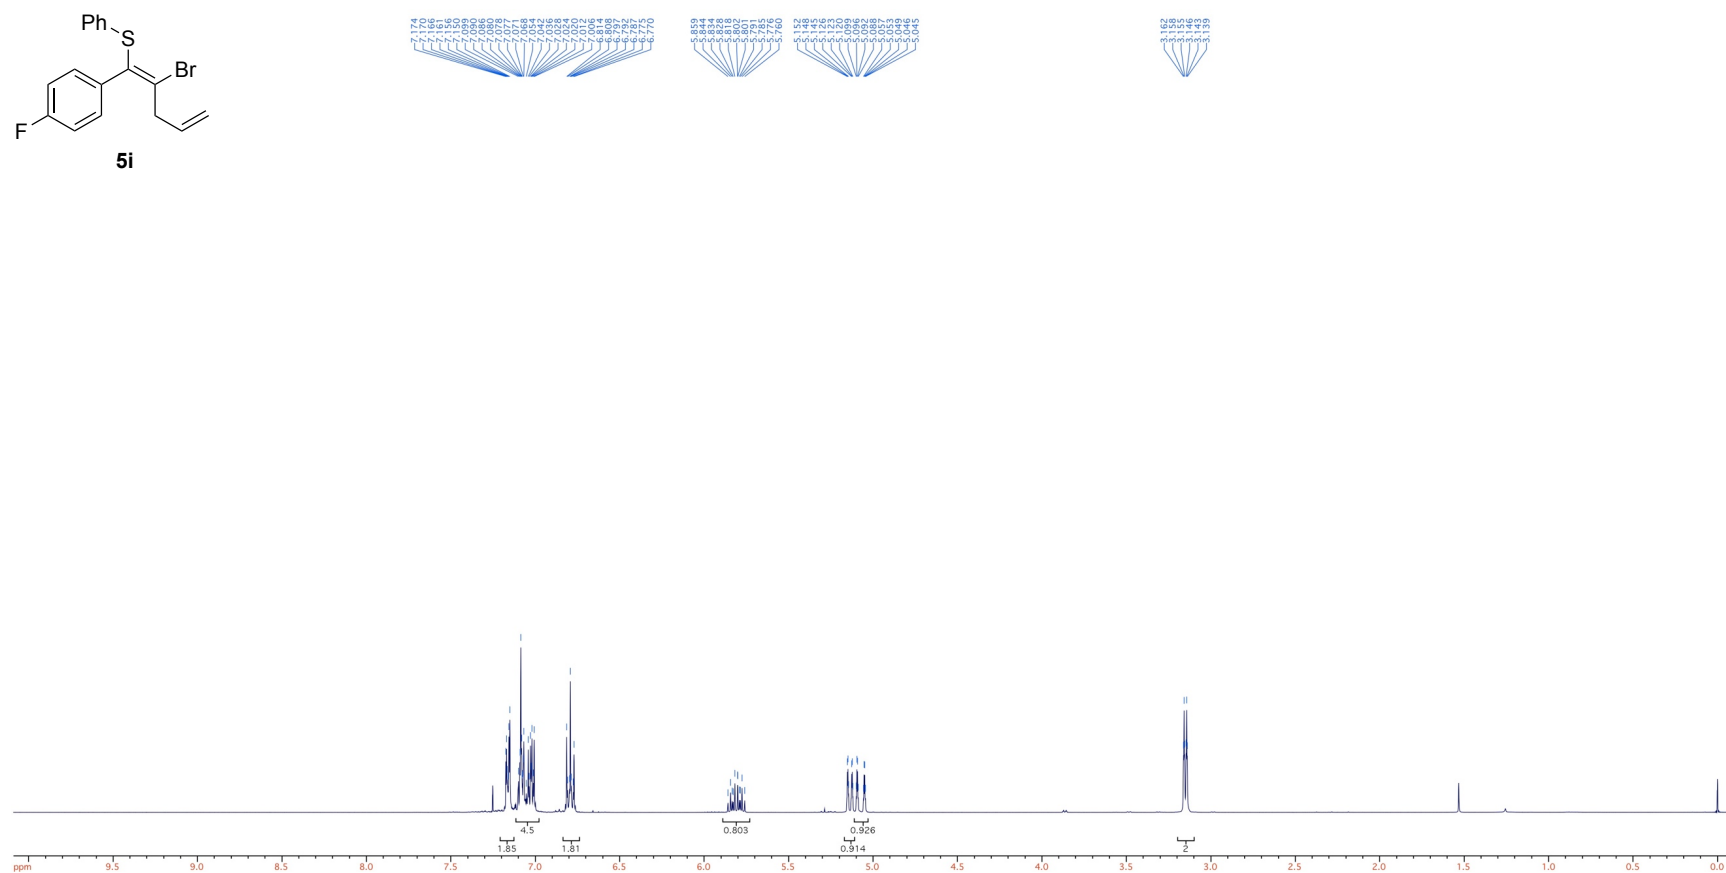

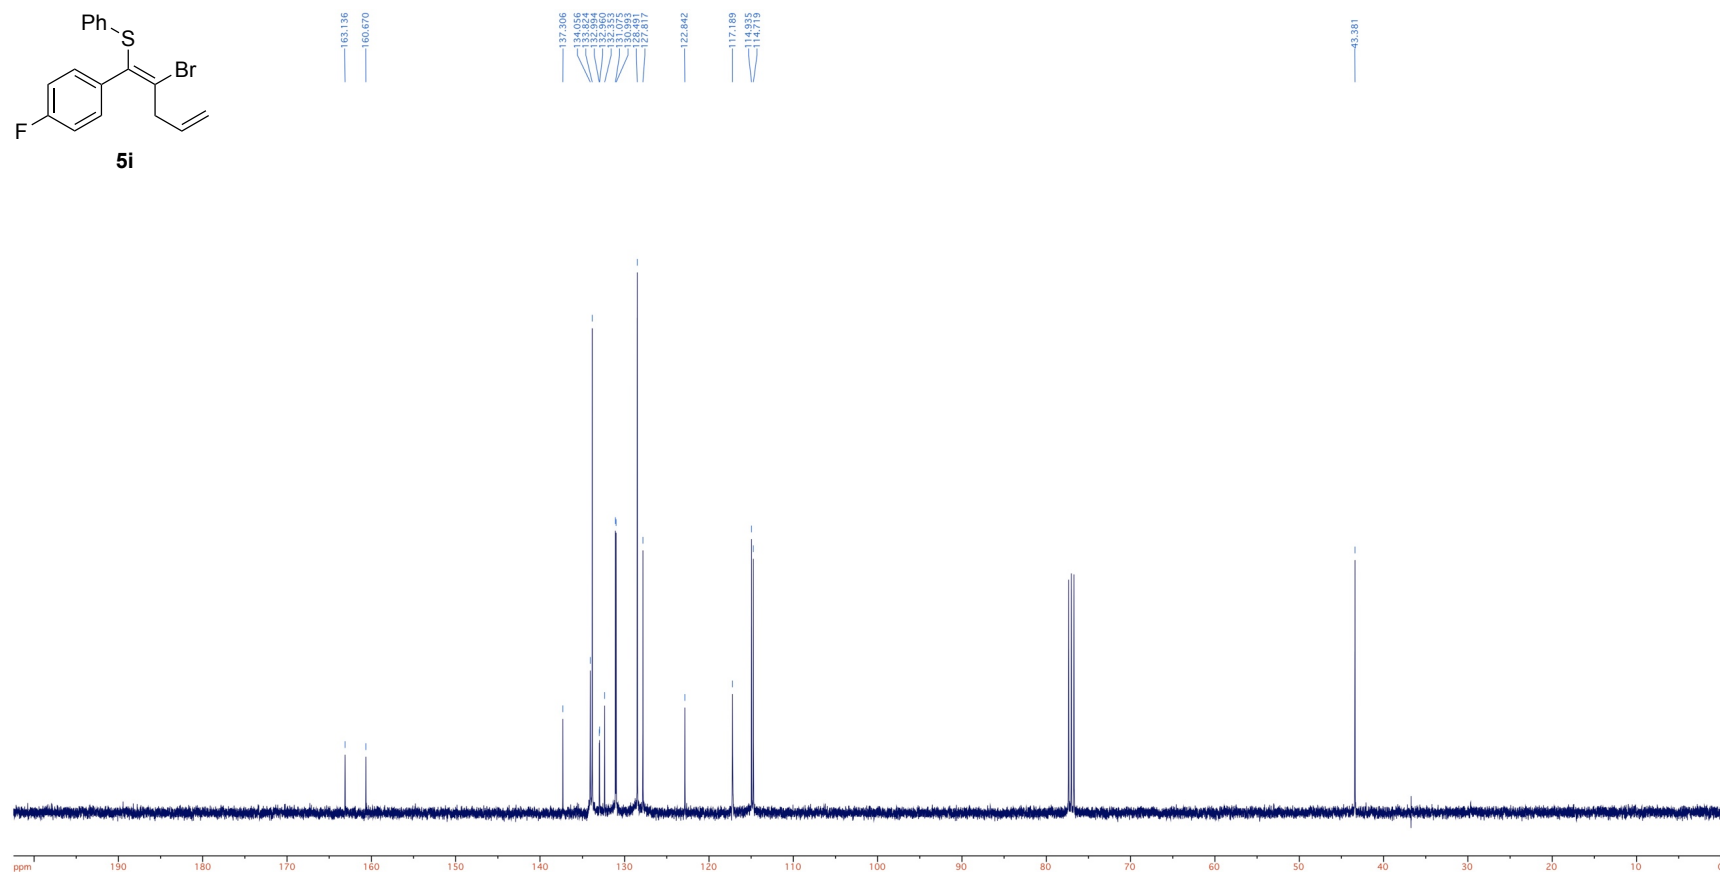



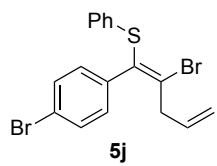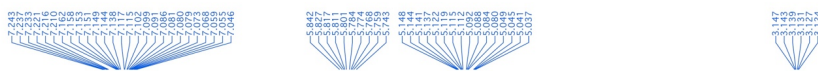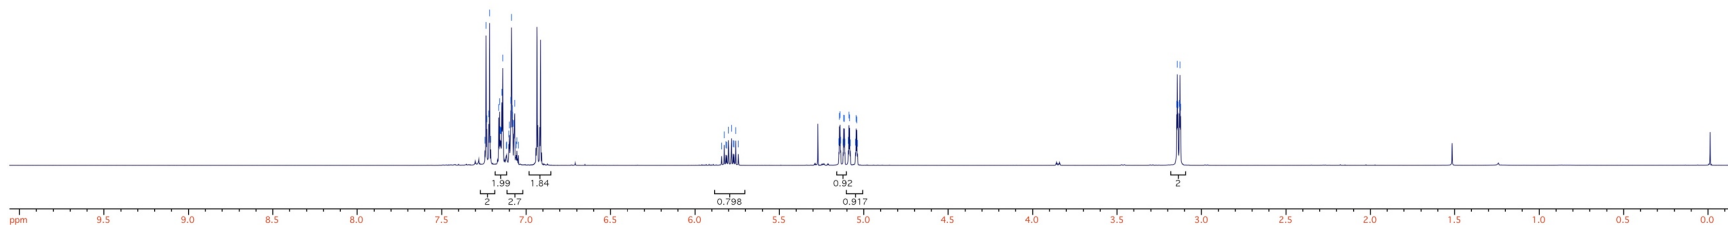

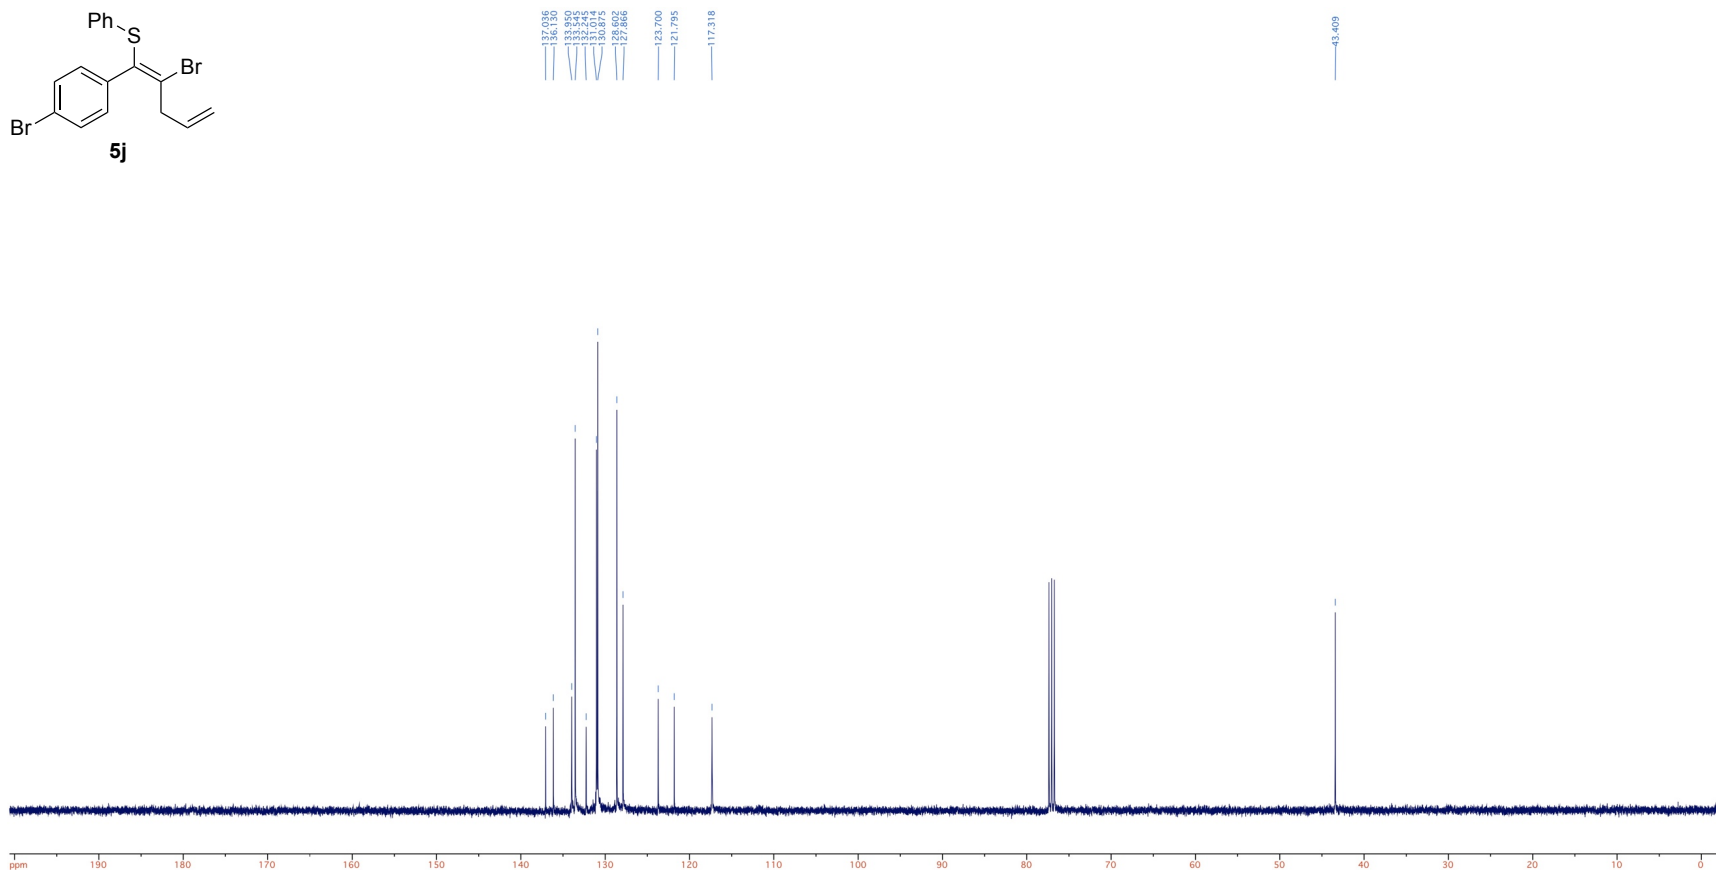



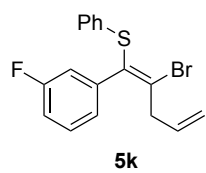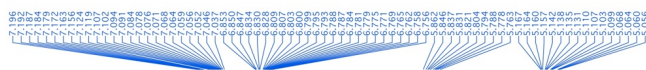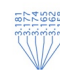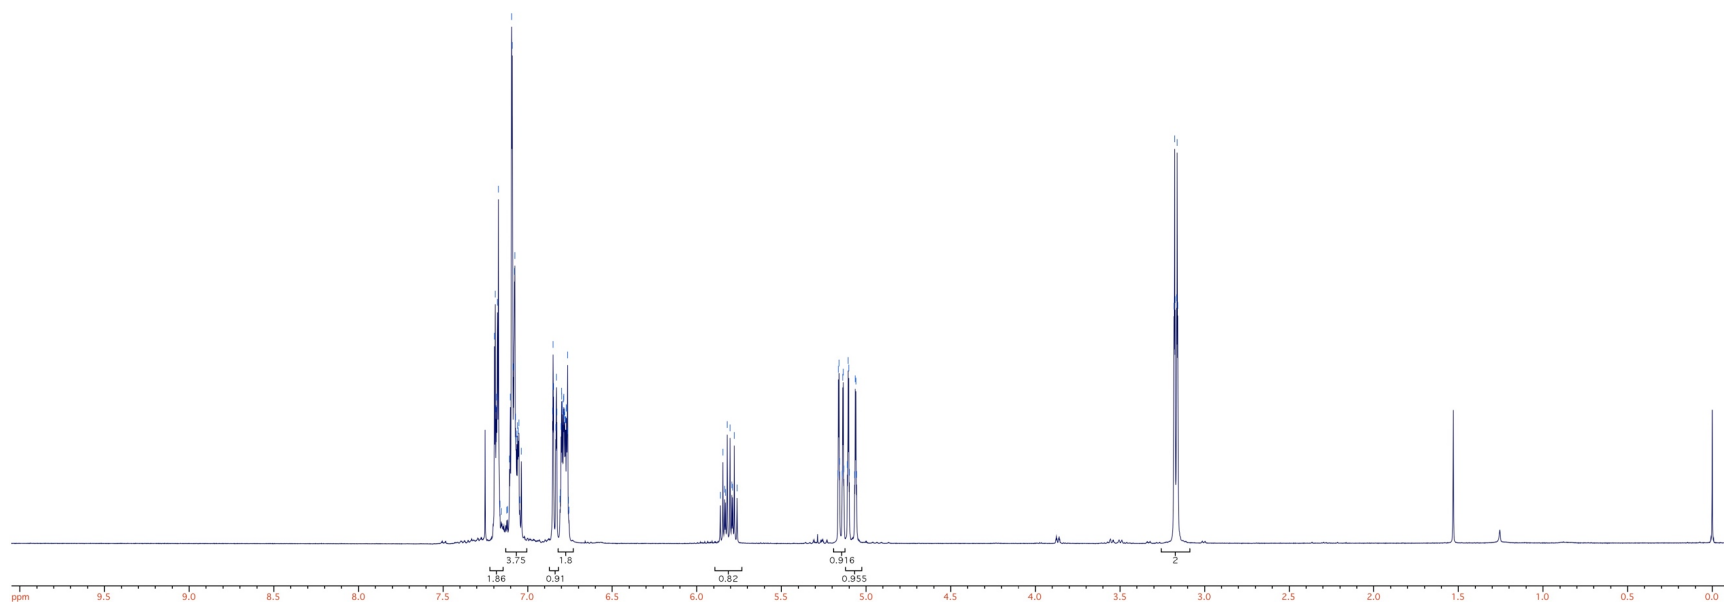

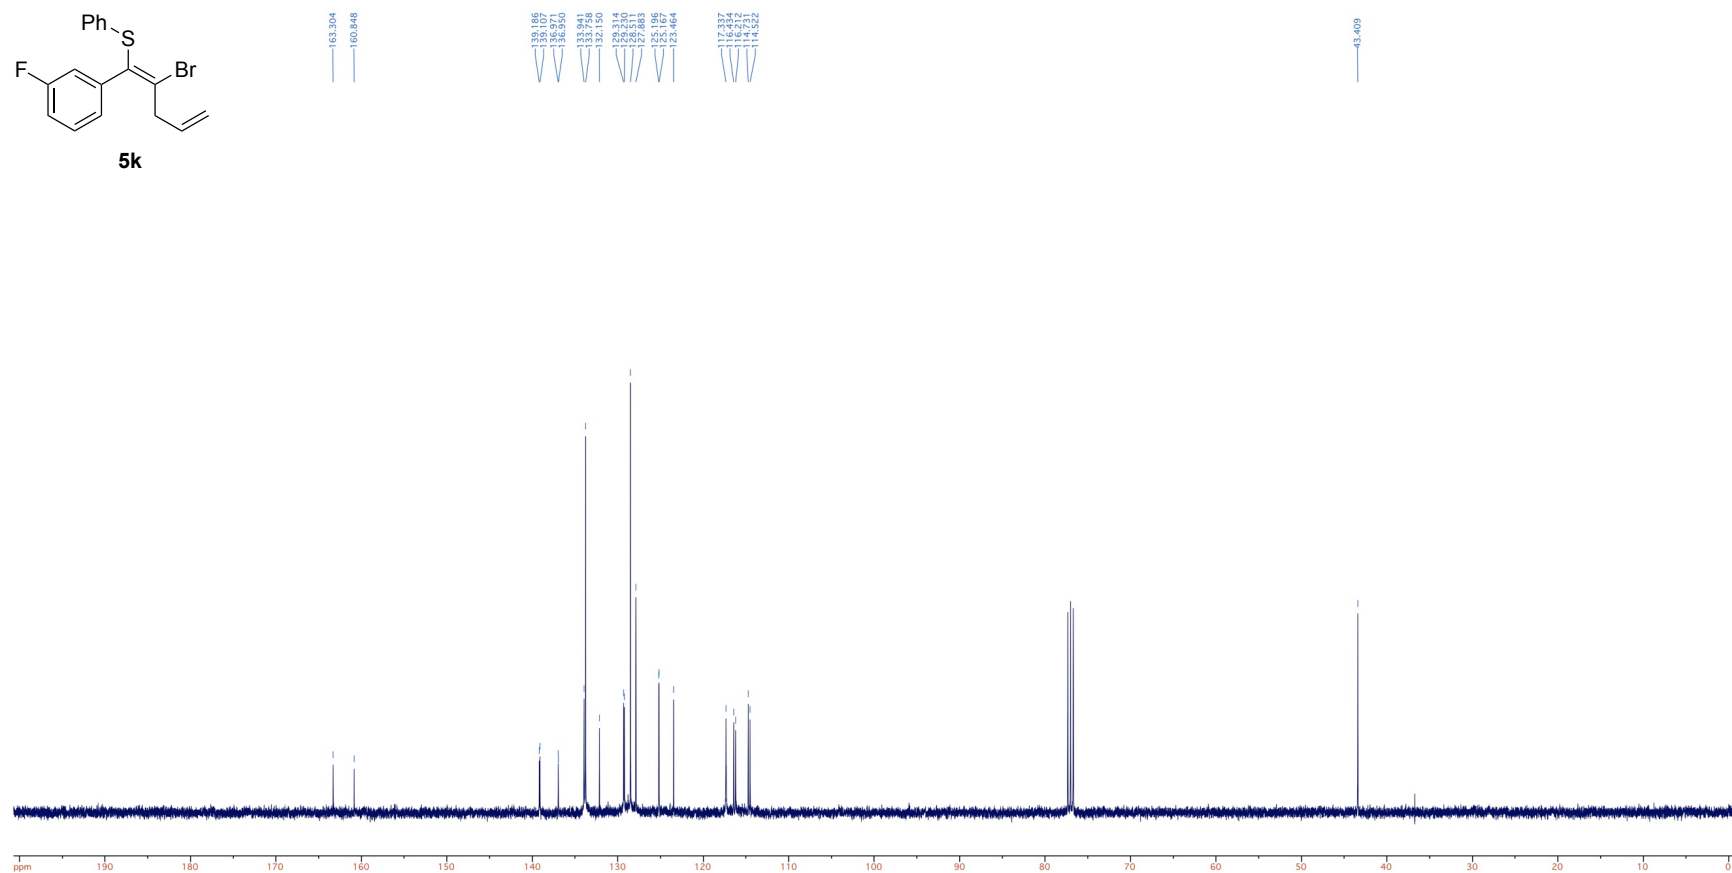



110.0000  
110.0000  
110.0000  
110.0000  
110.0000

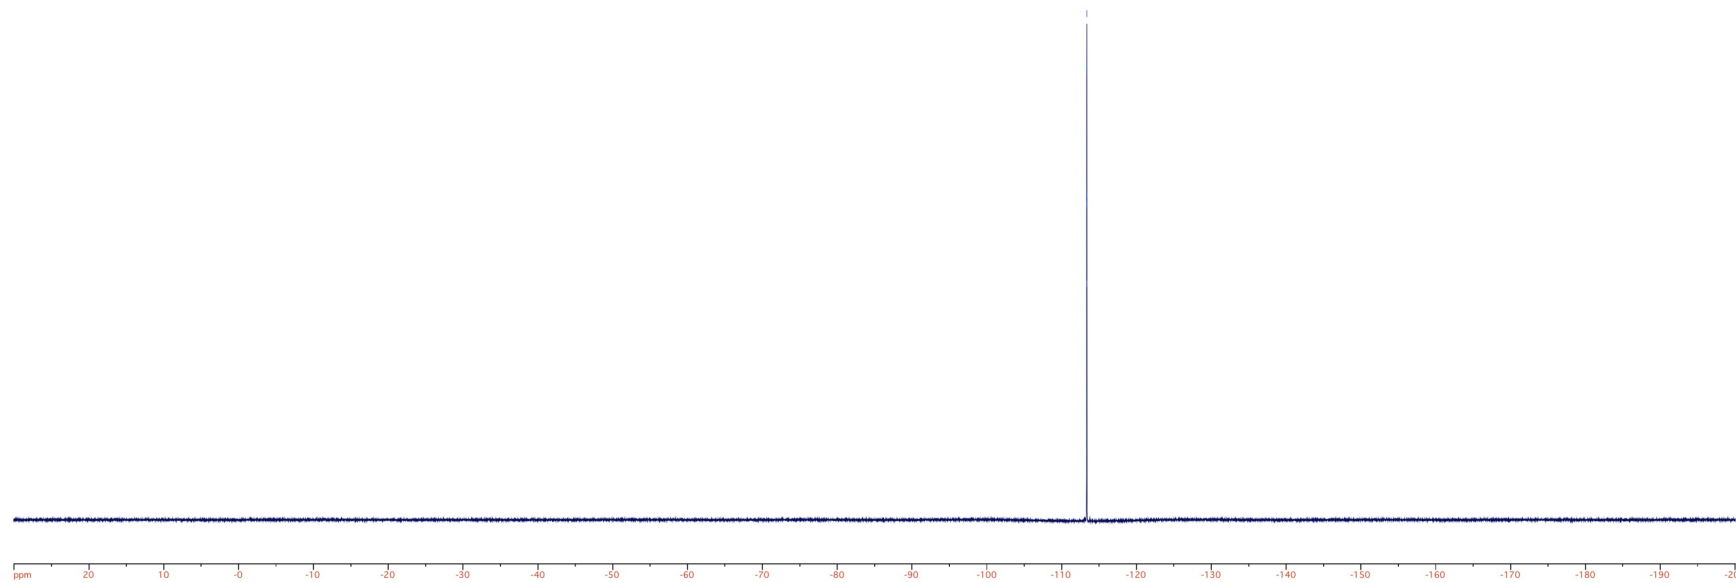

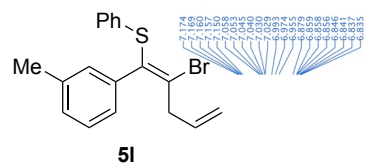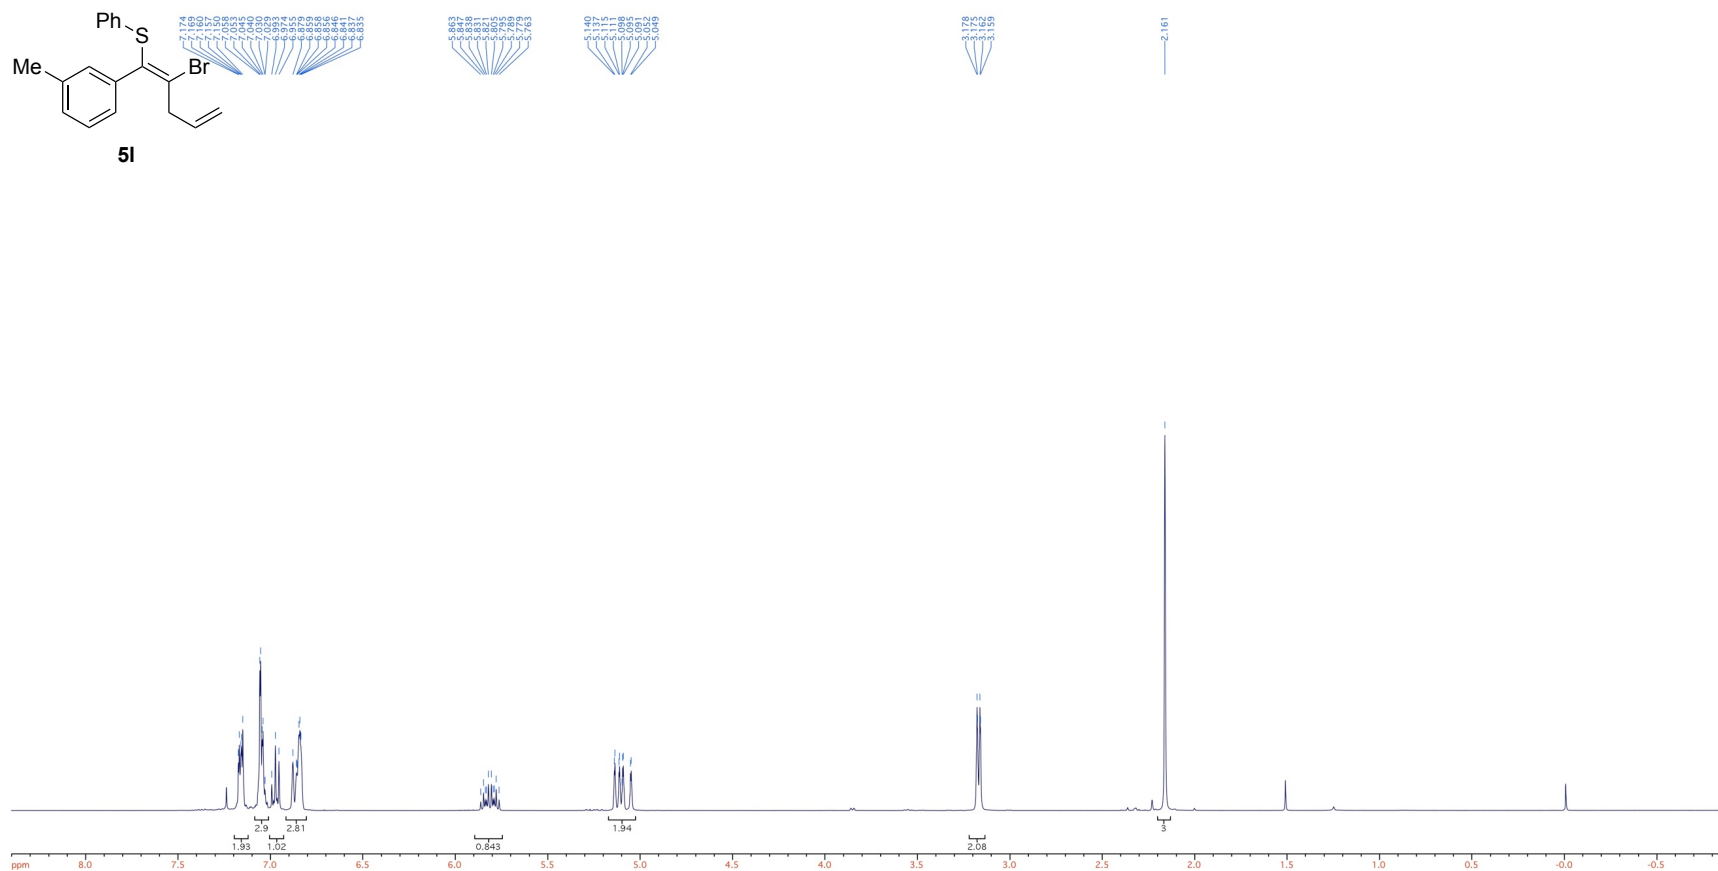

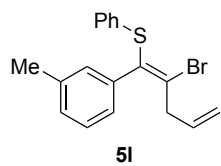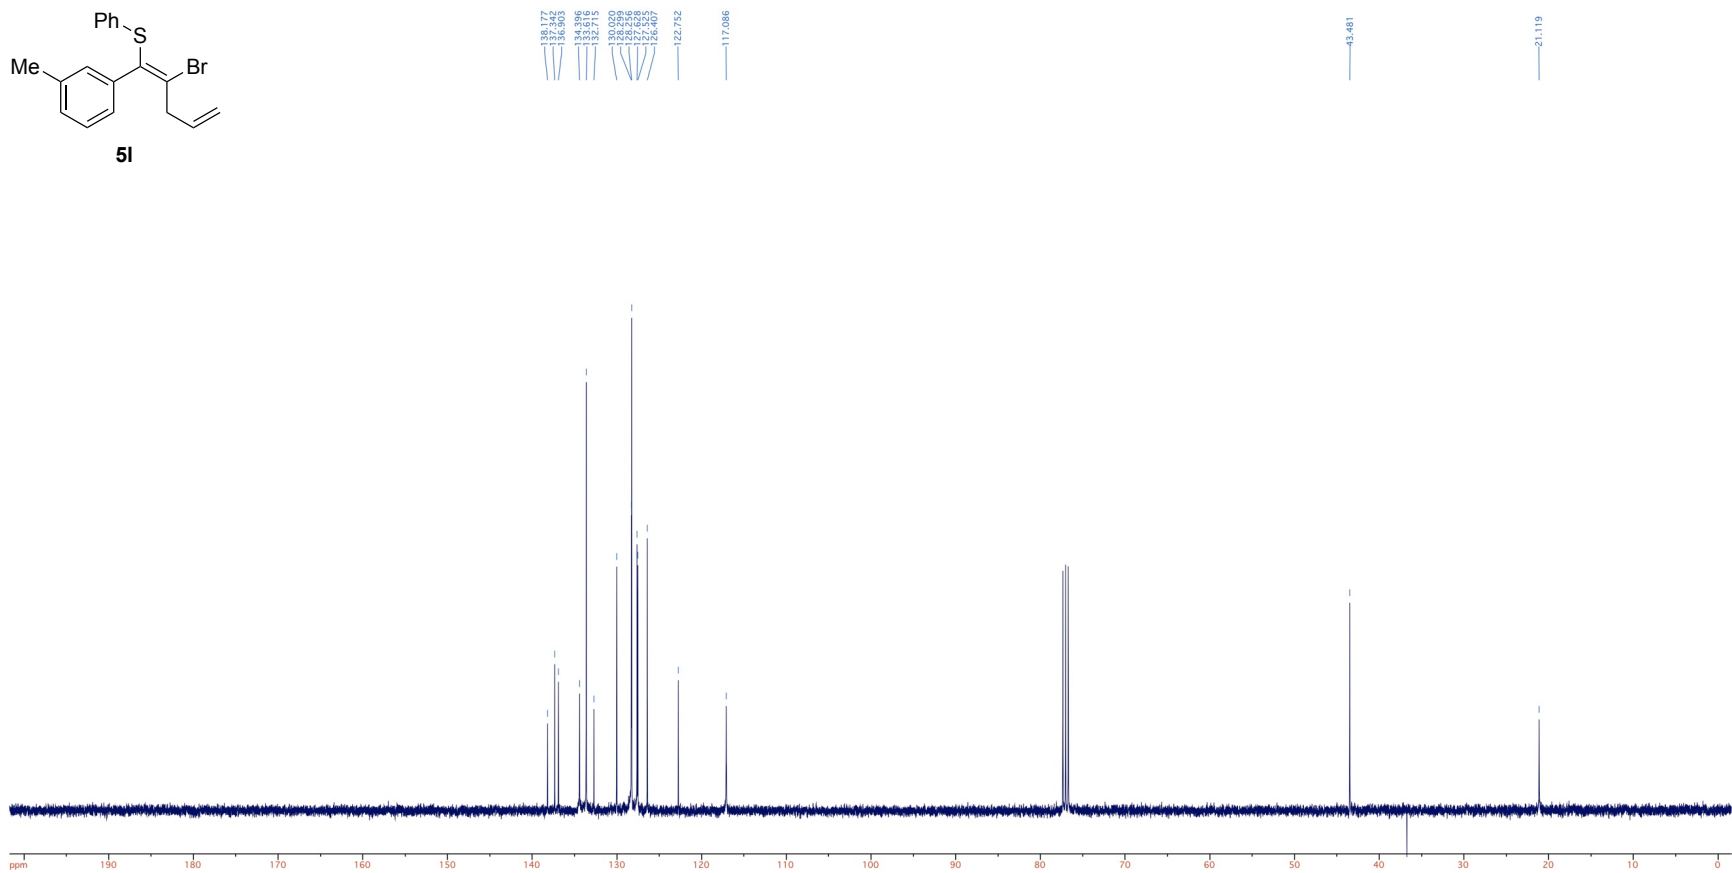

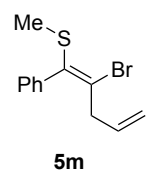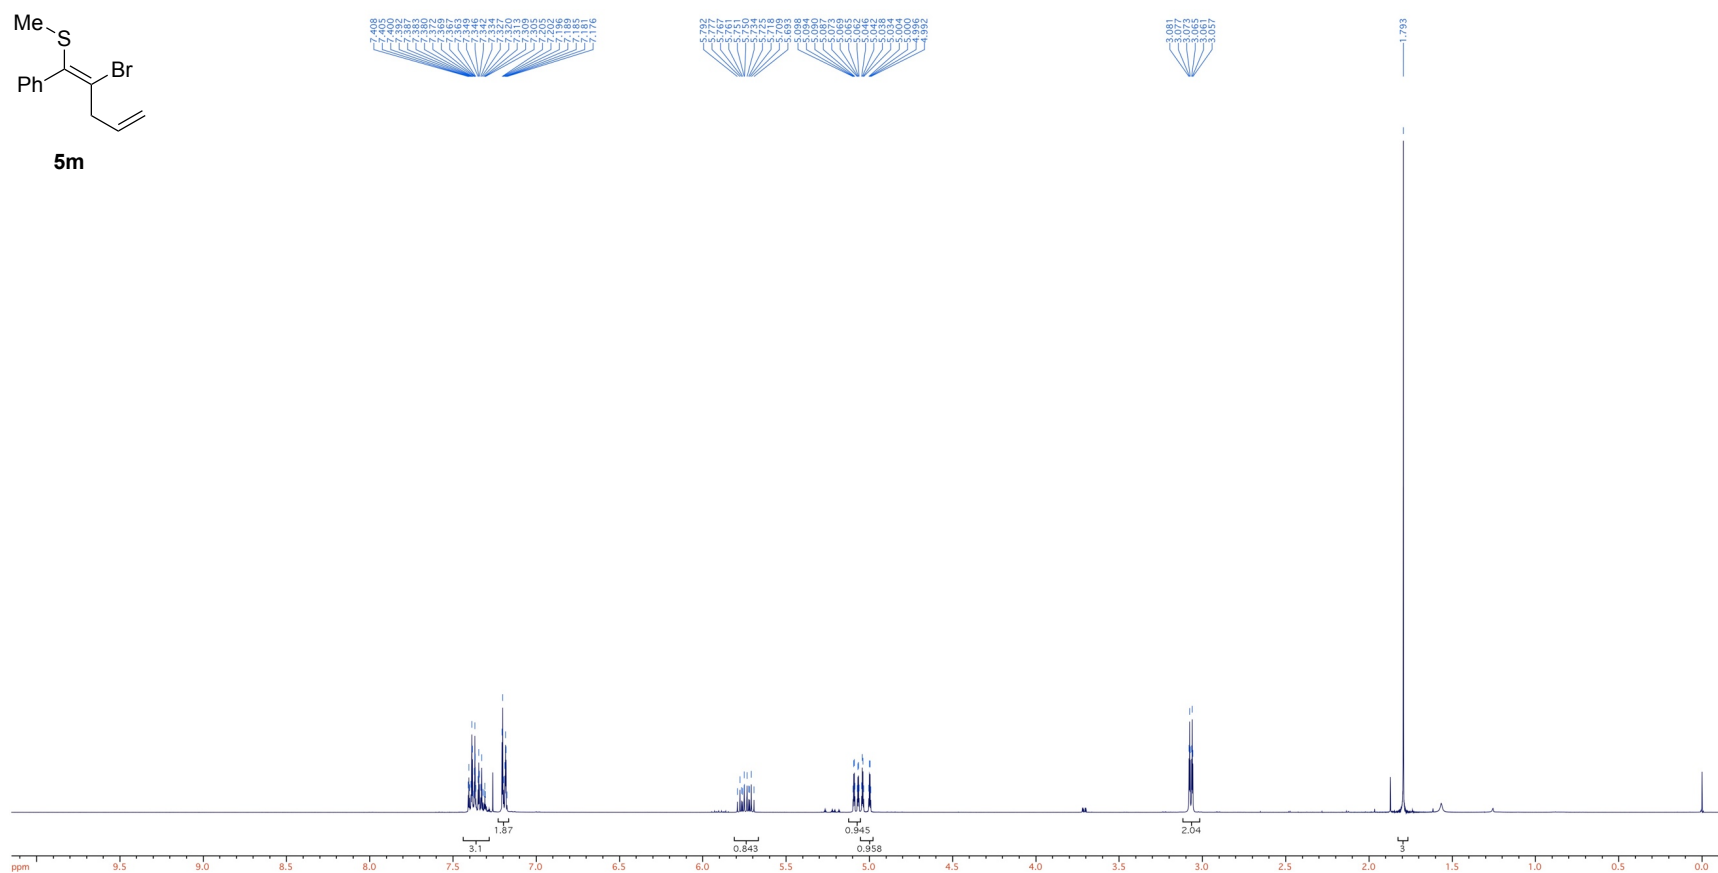

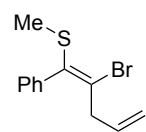

5m

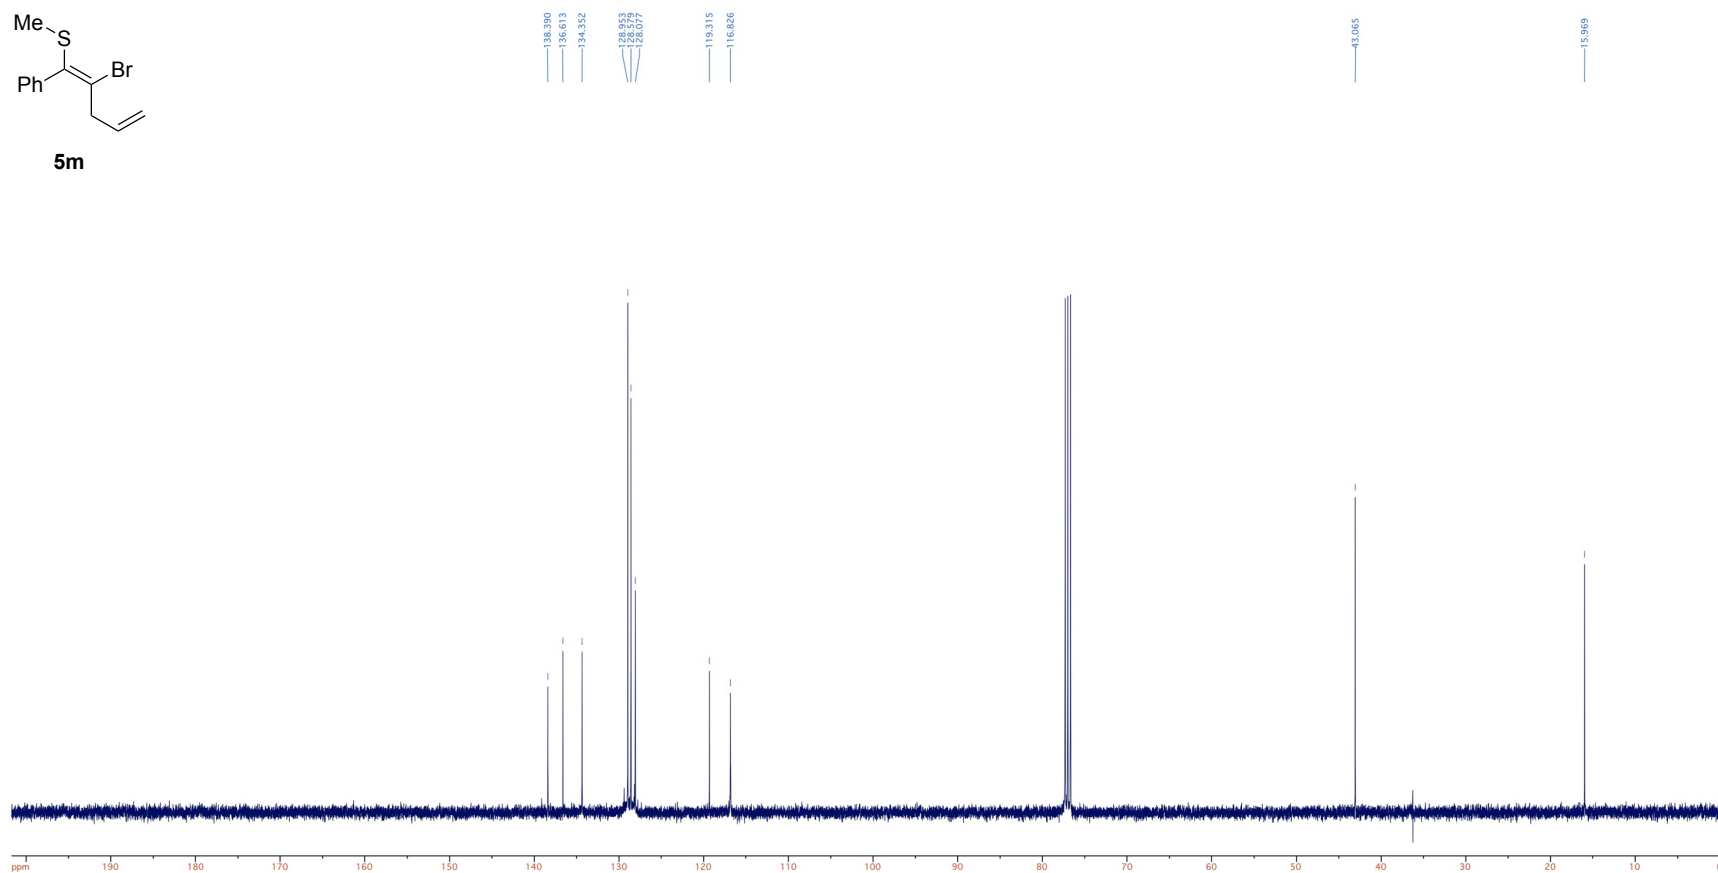





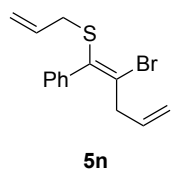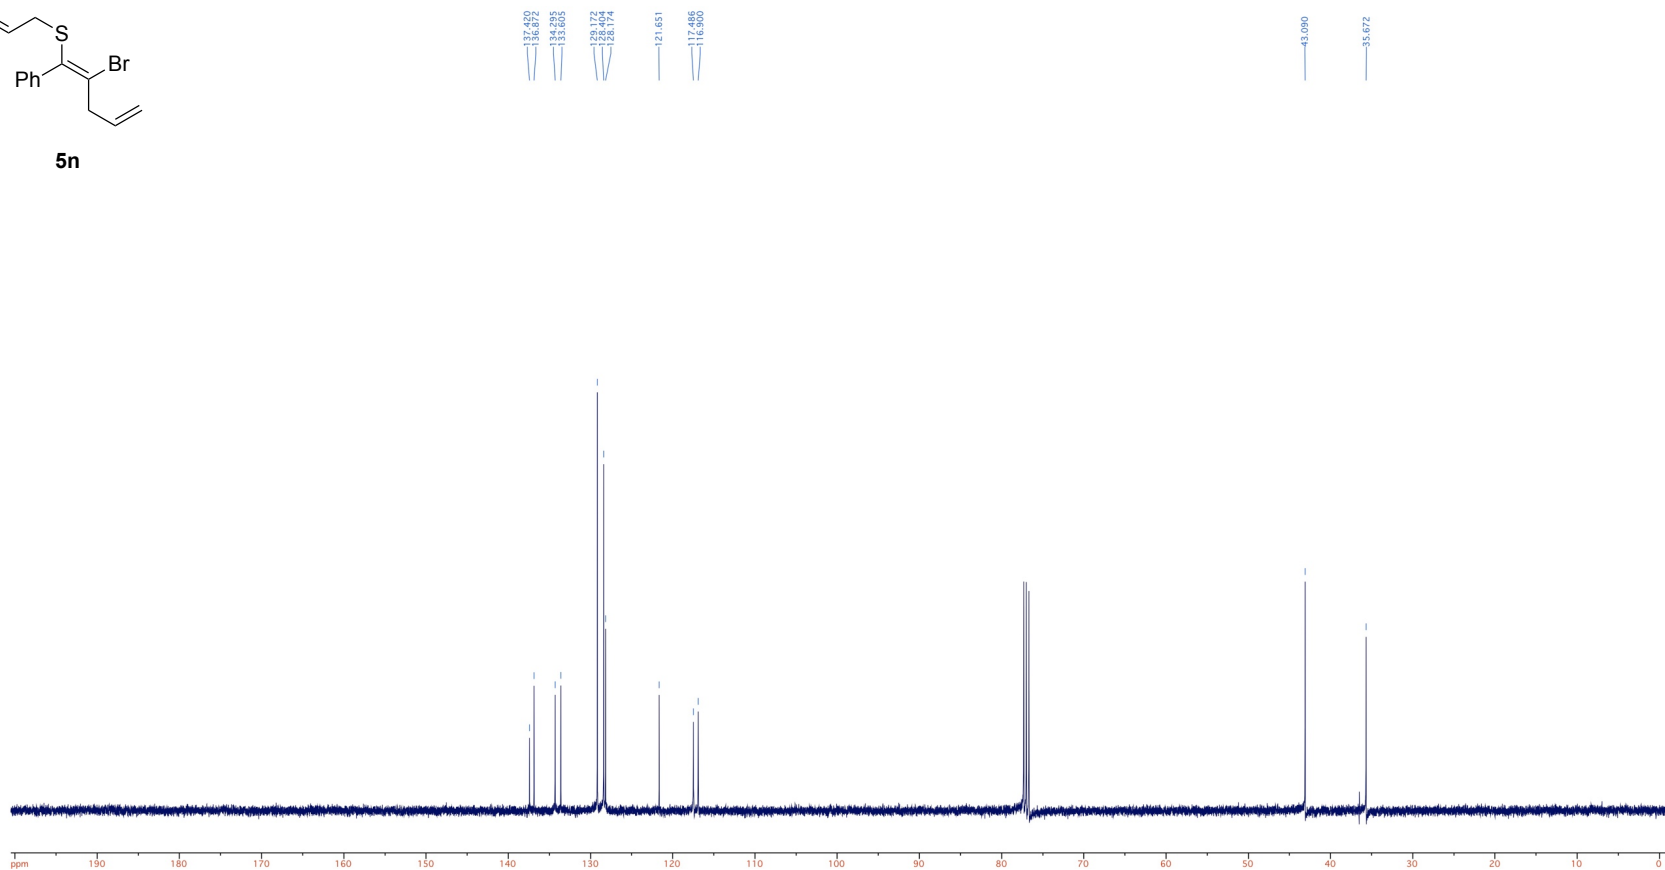

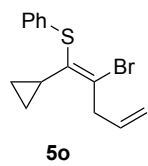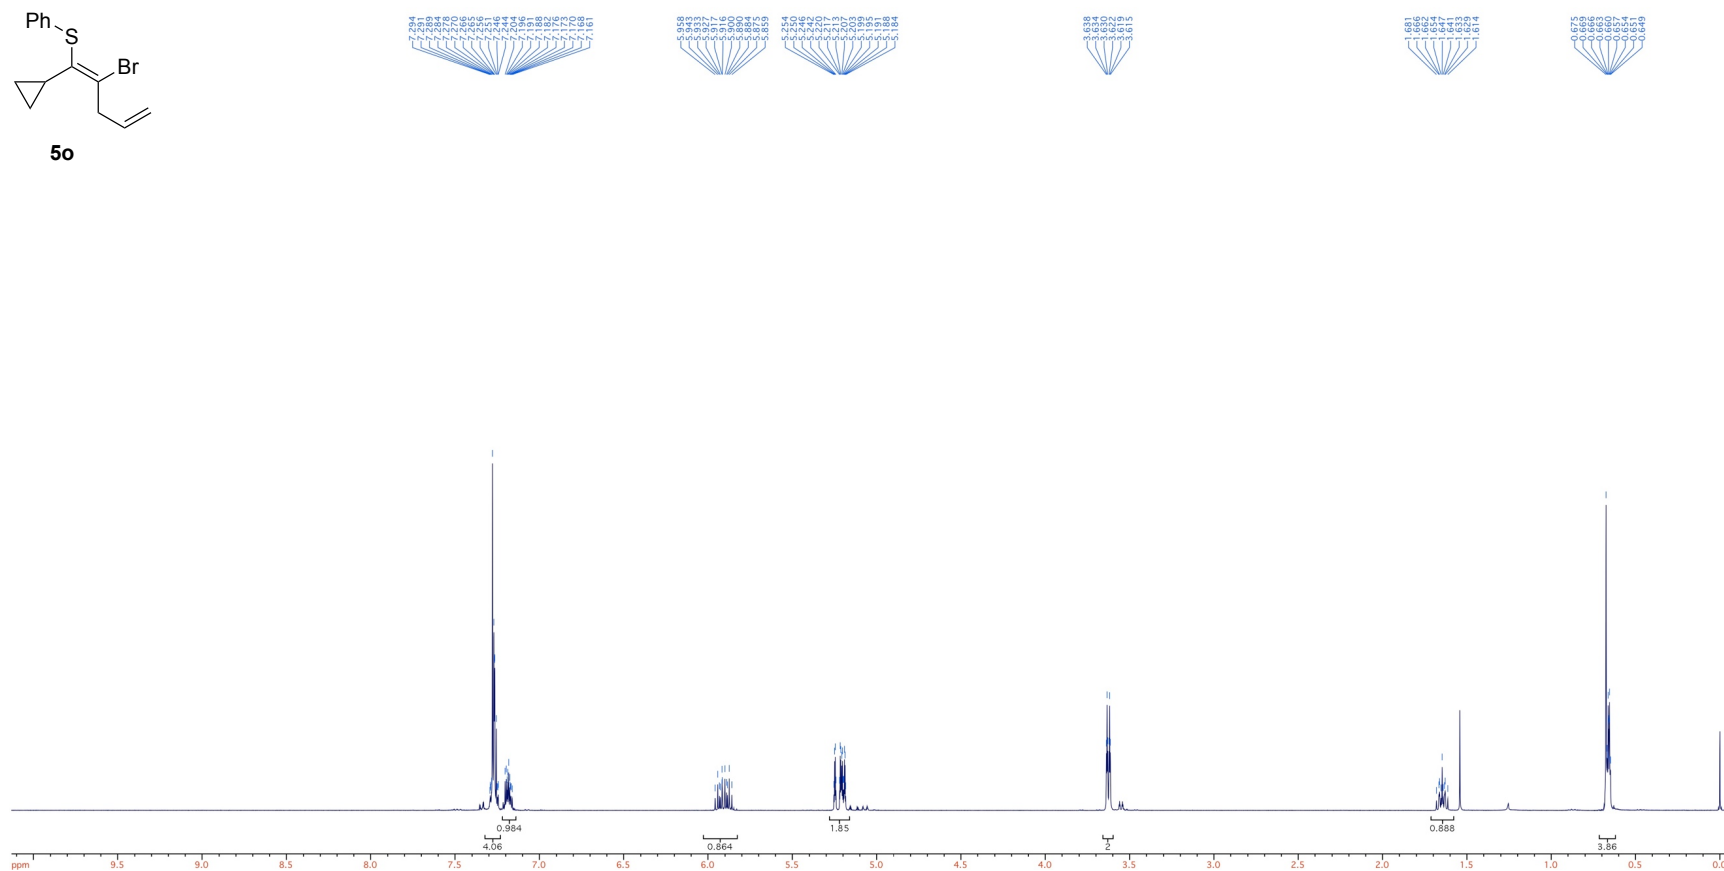

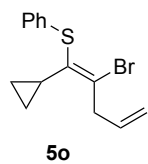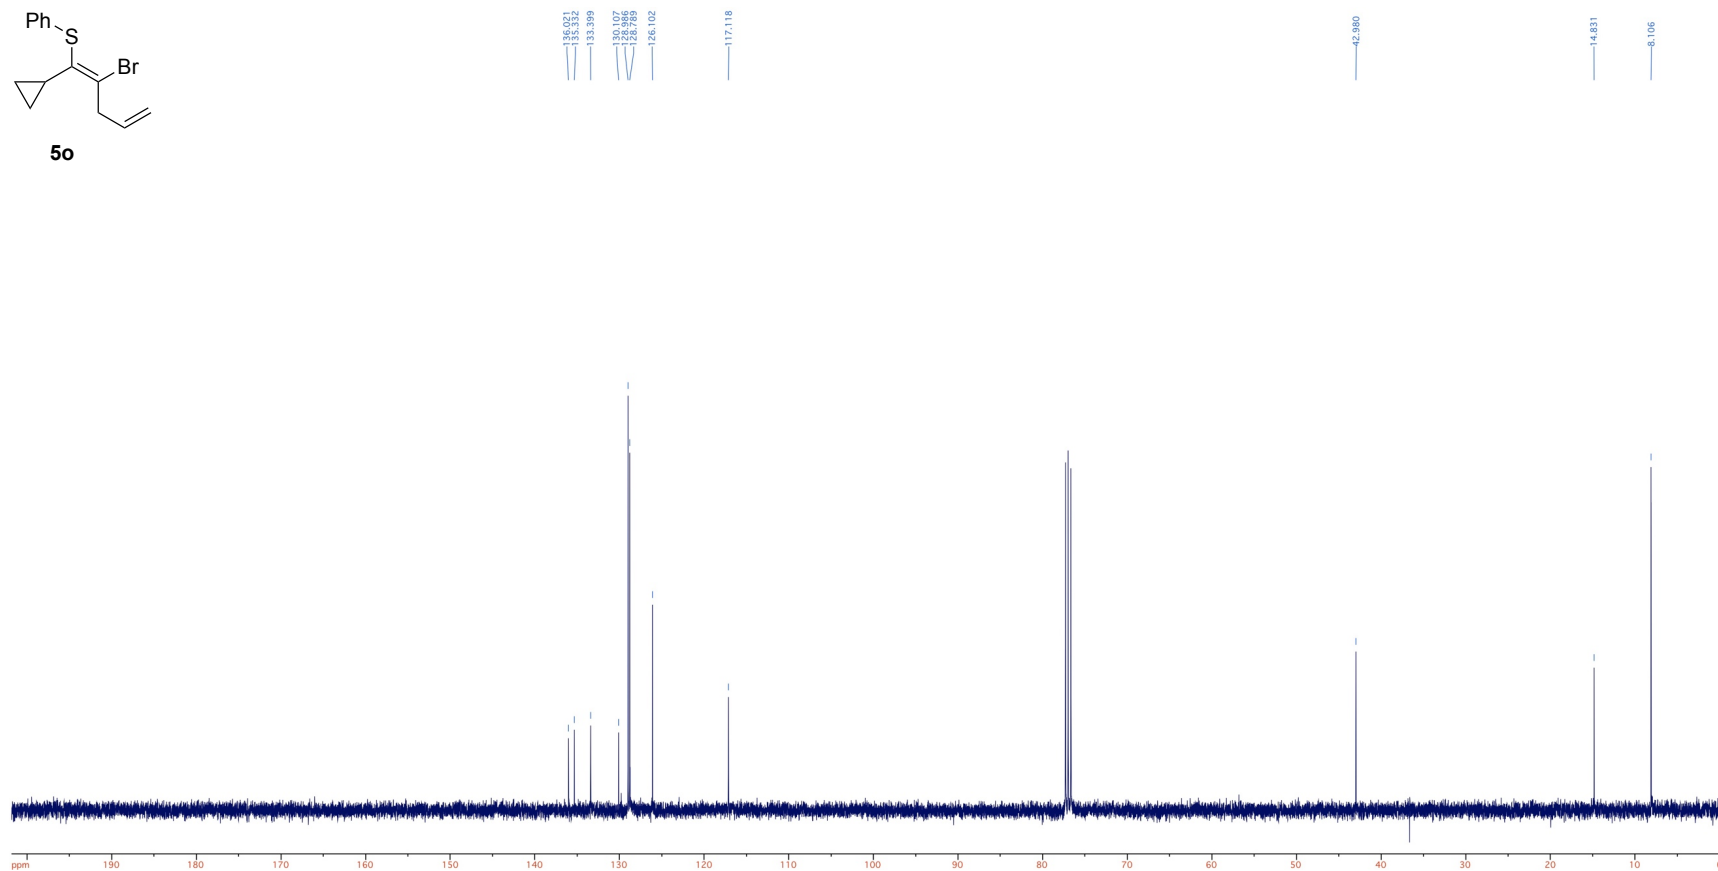

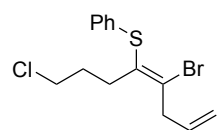

5p

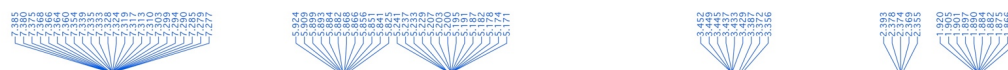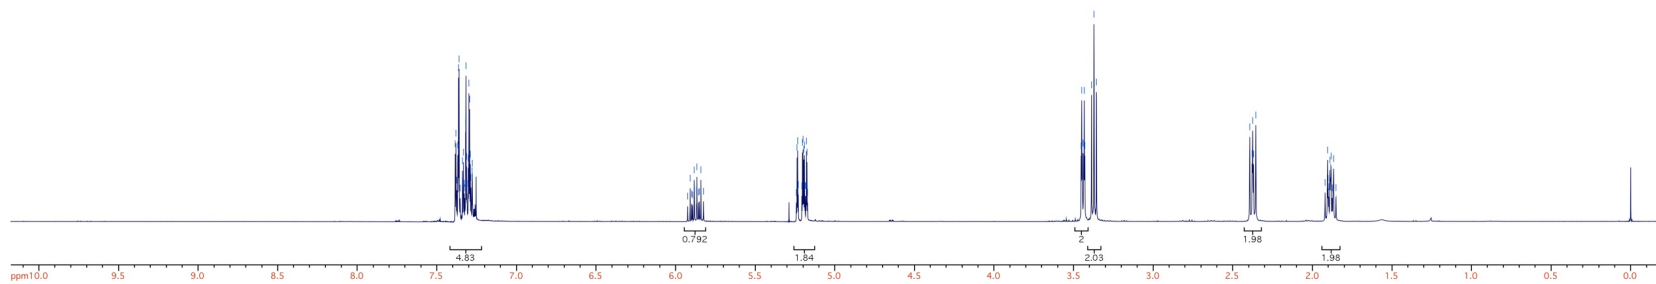



5p

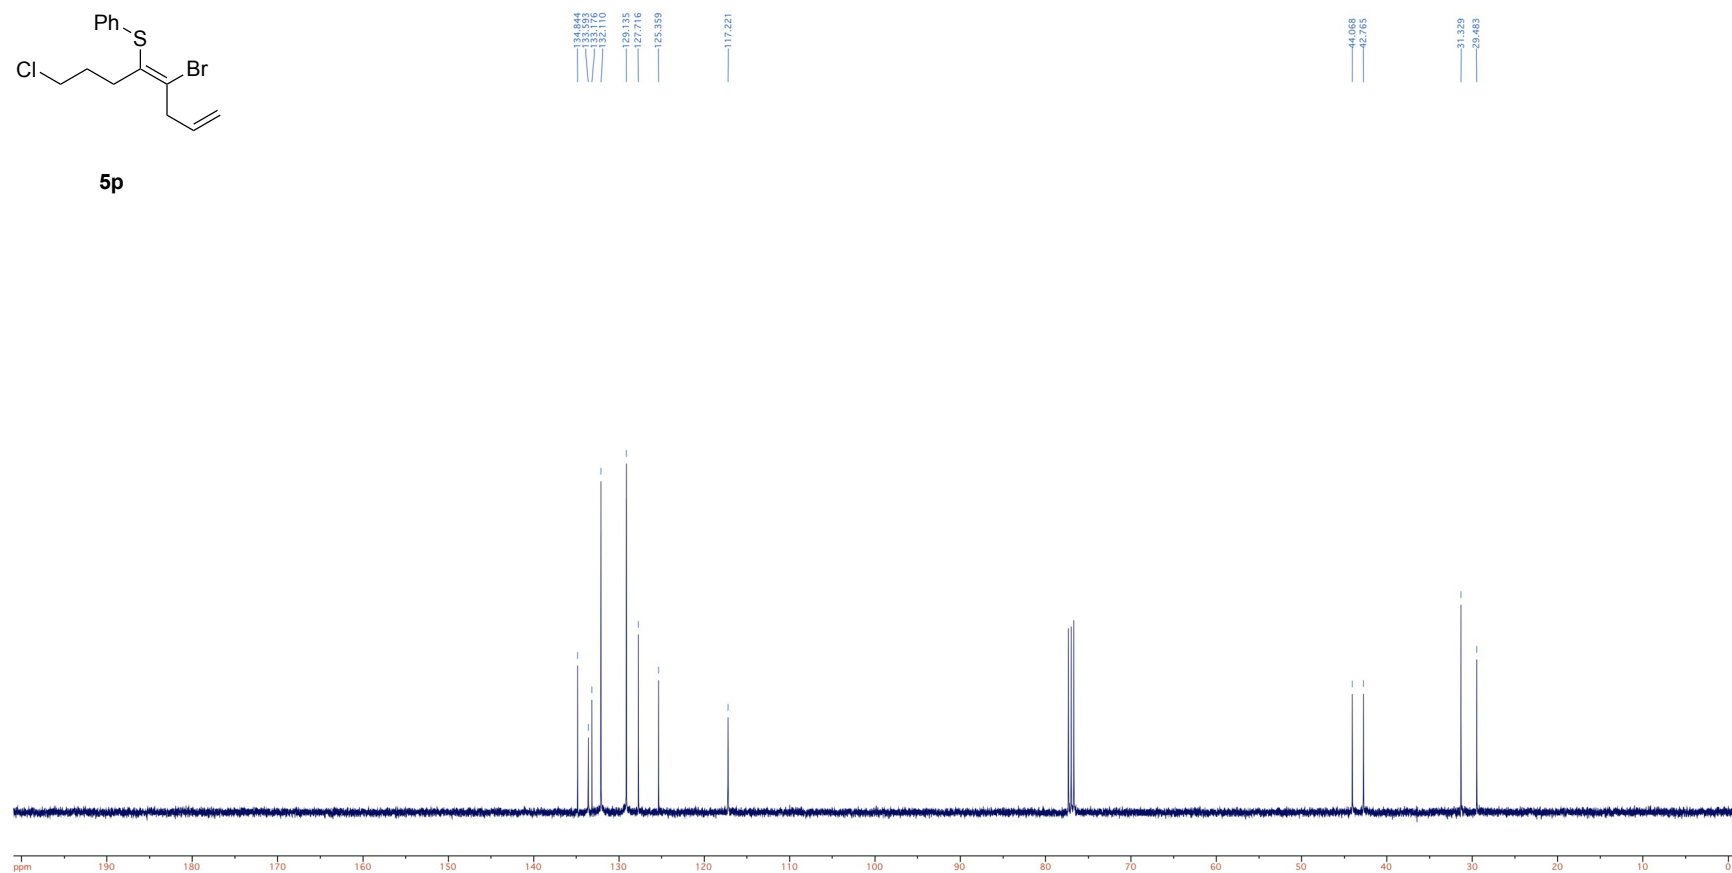

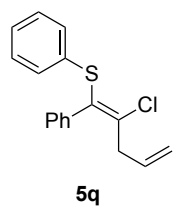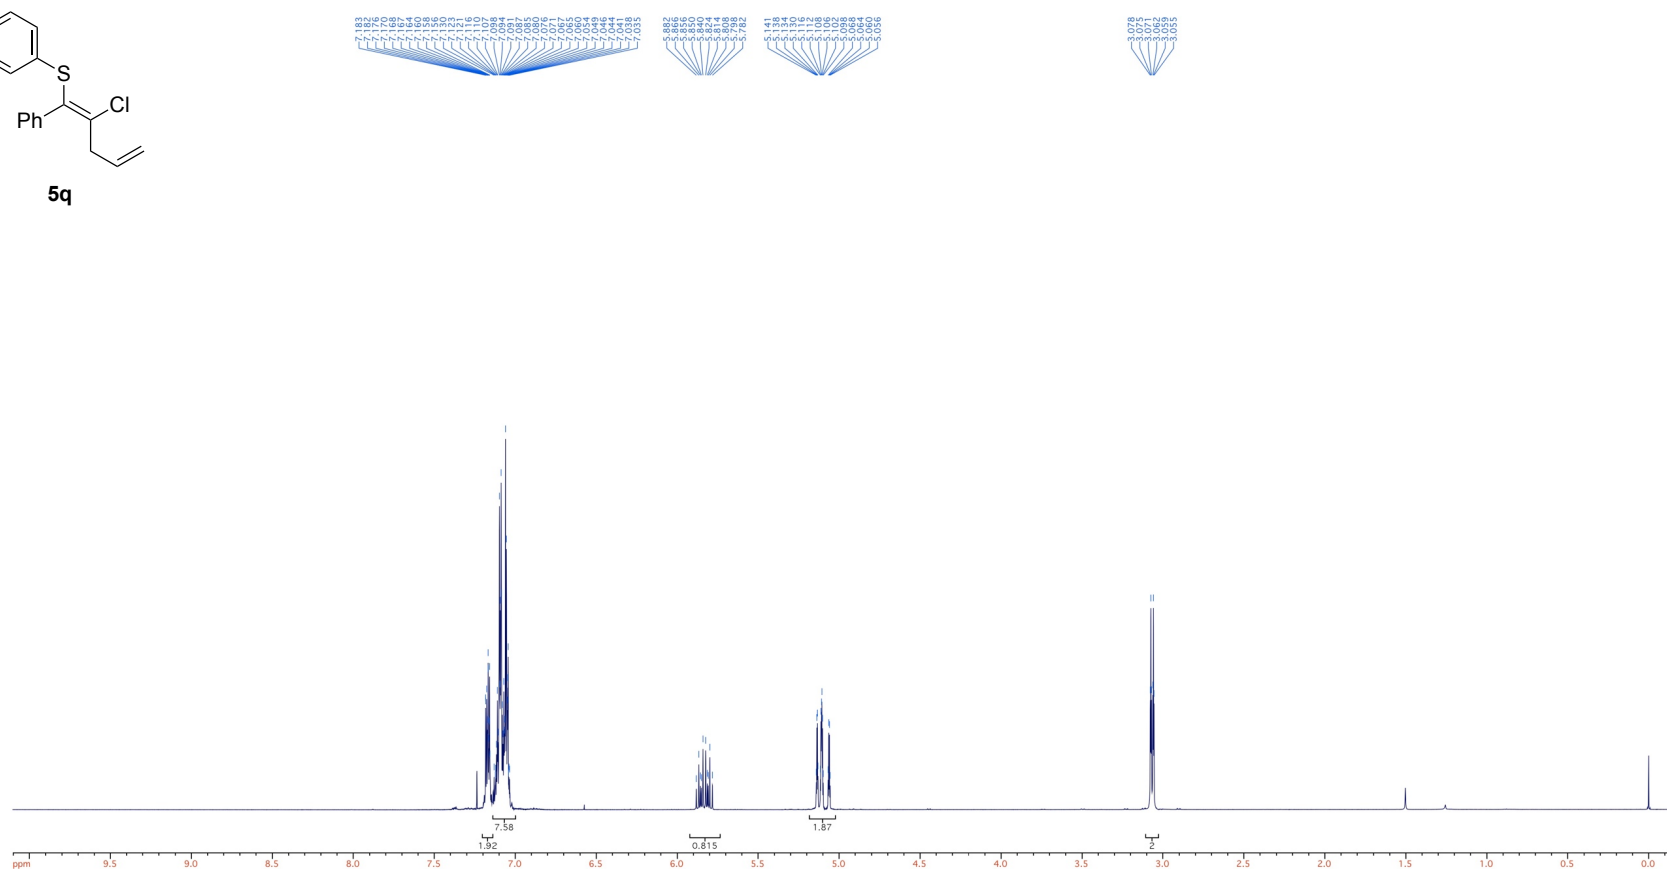







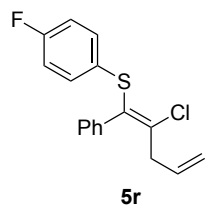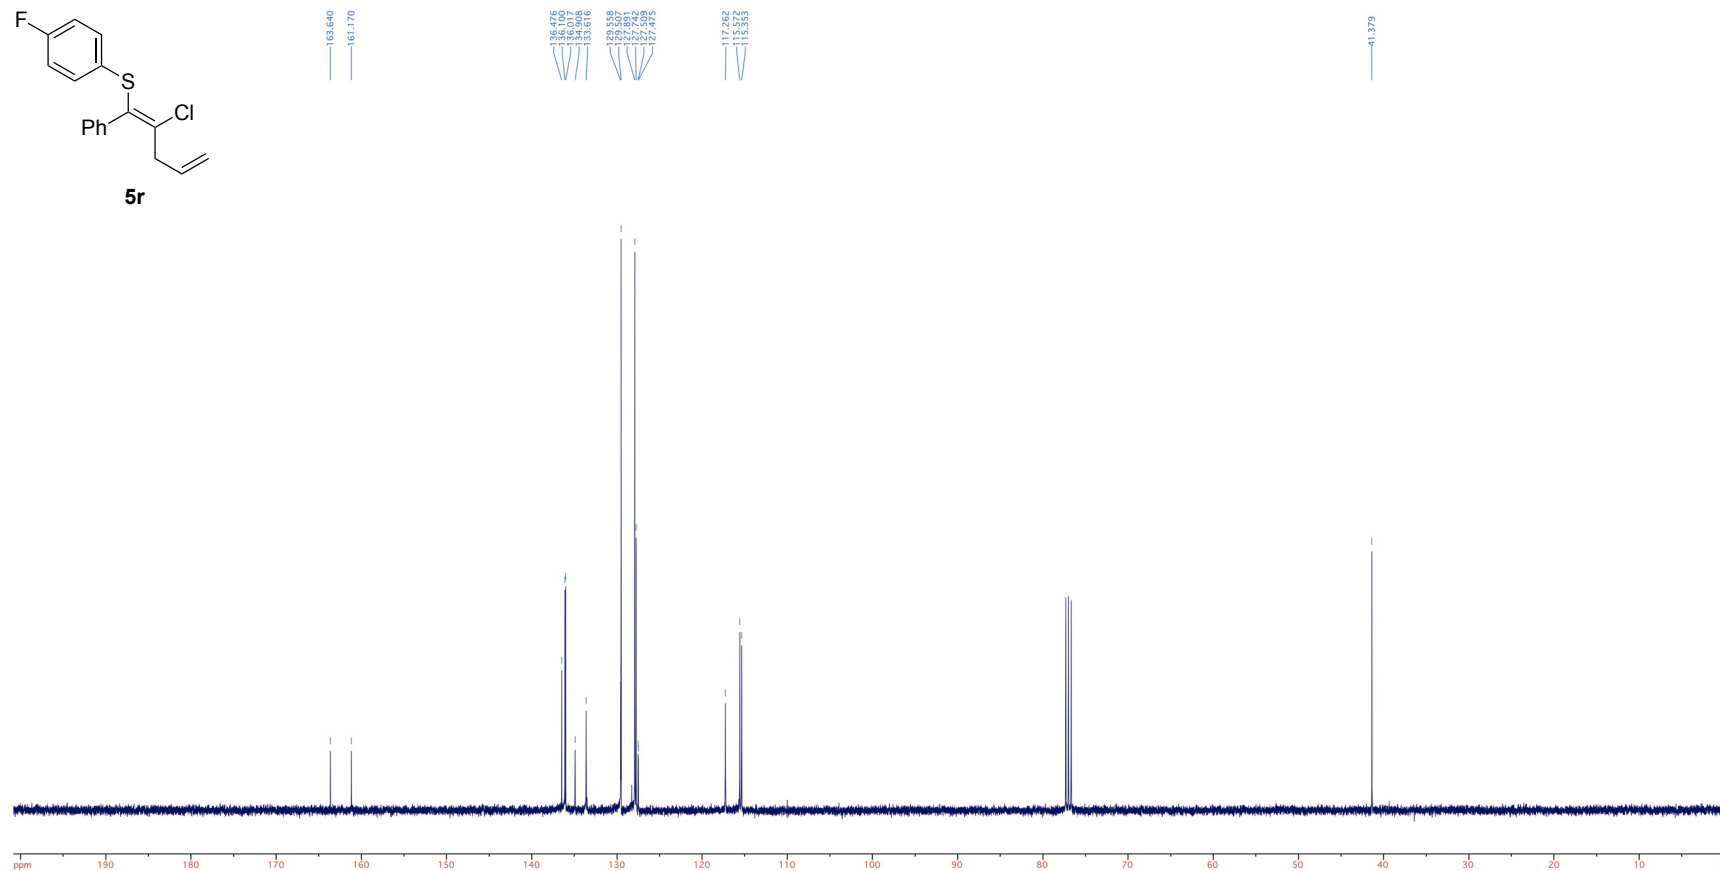

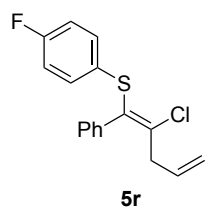

119.800  
119.790  
119.780  
119.770  
119.760  
119.750

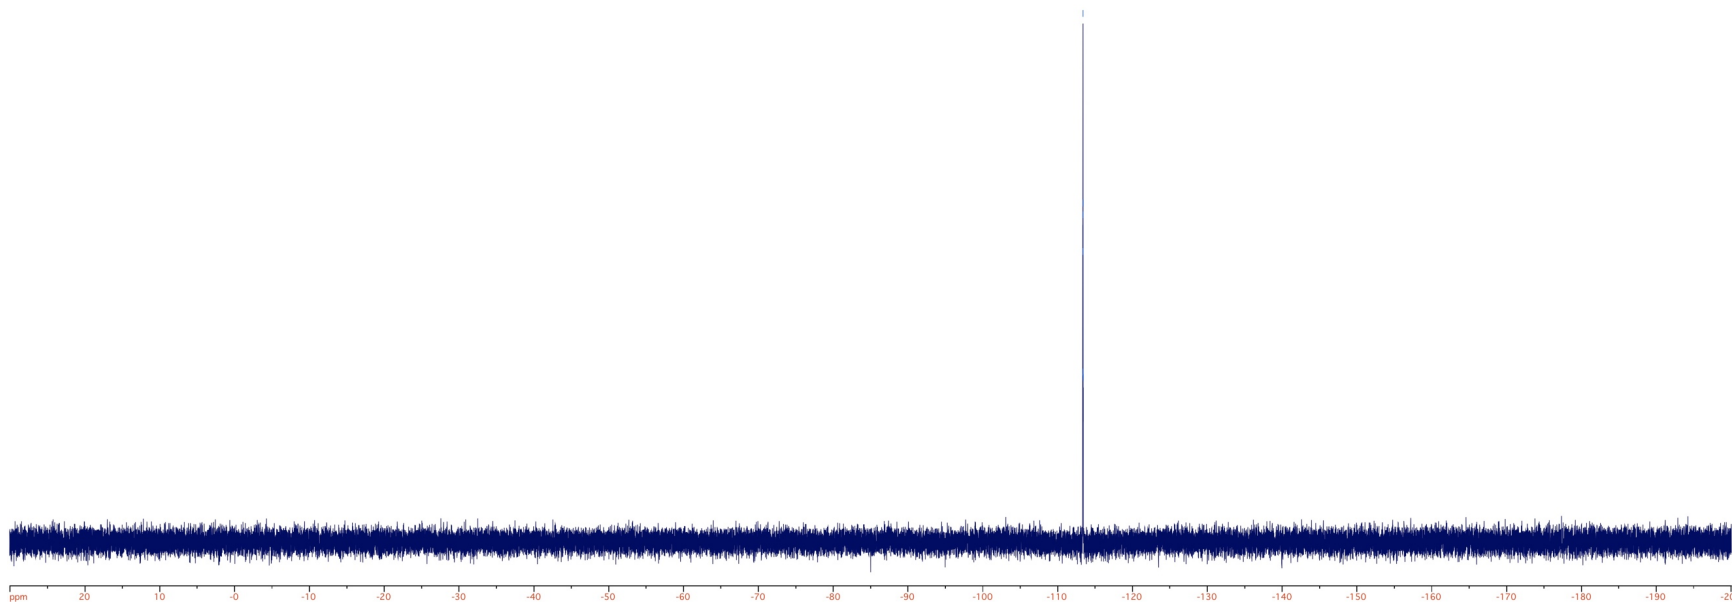

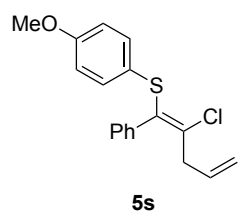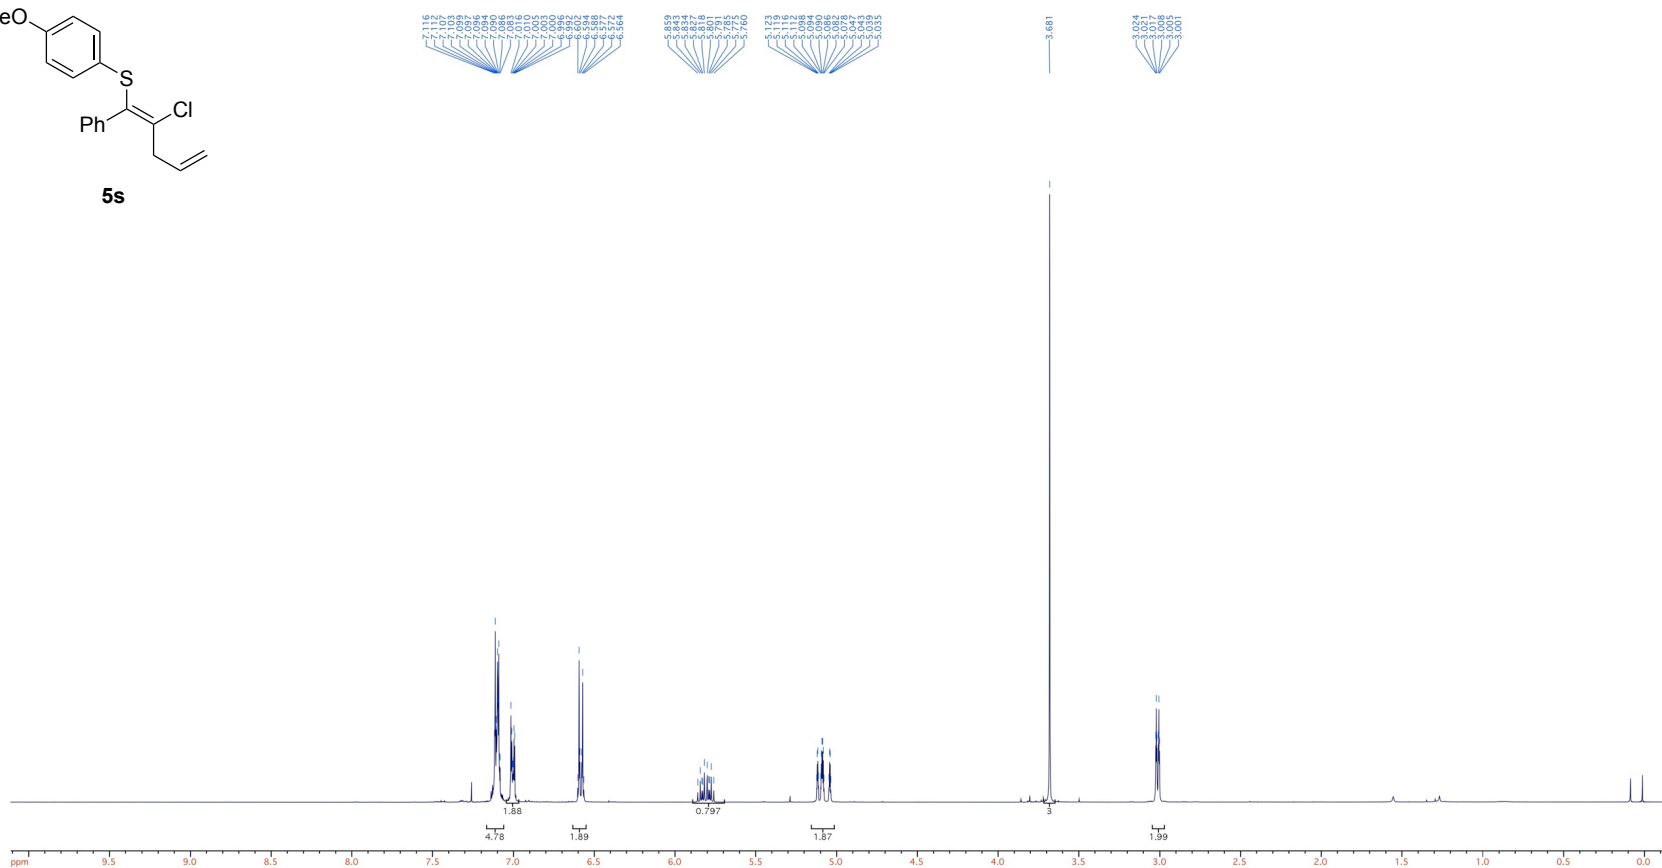

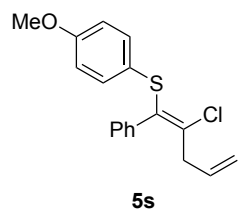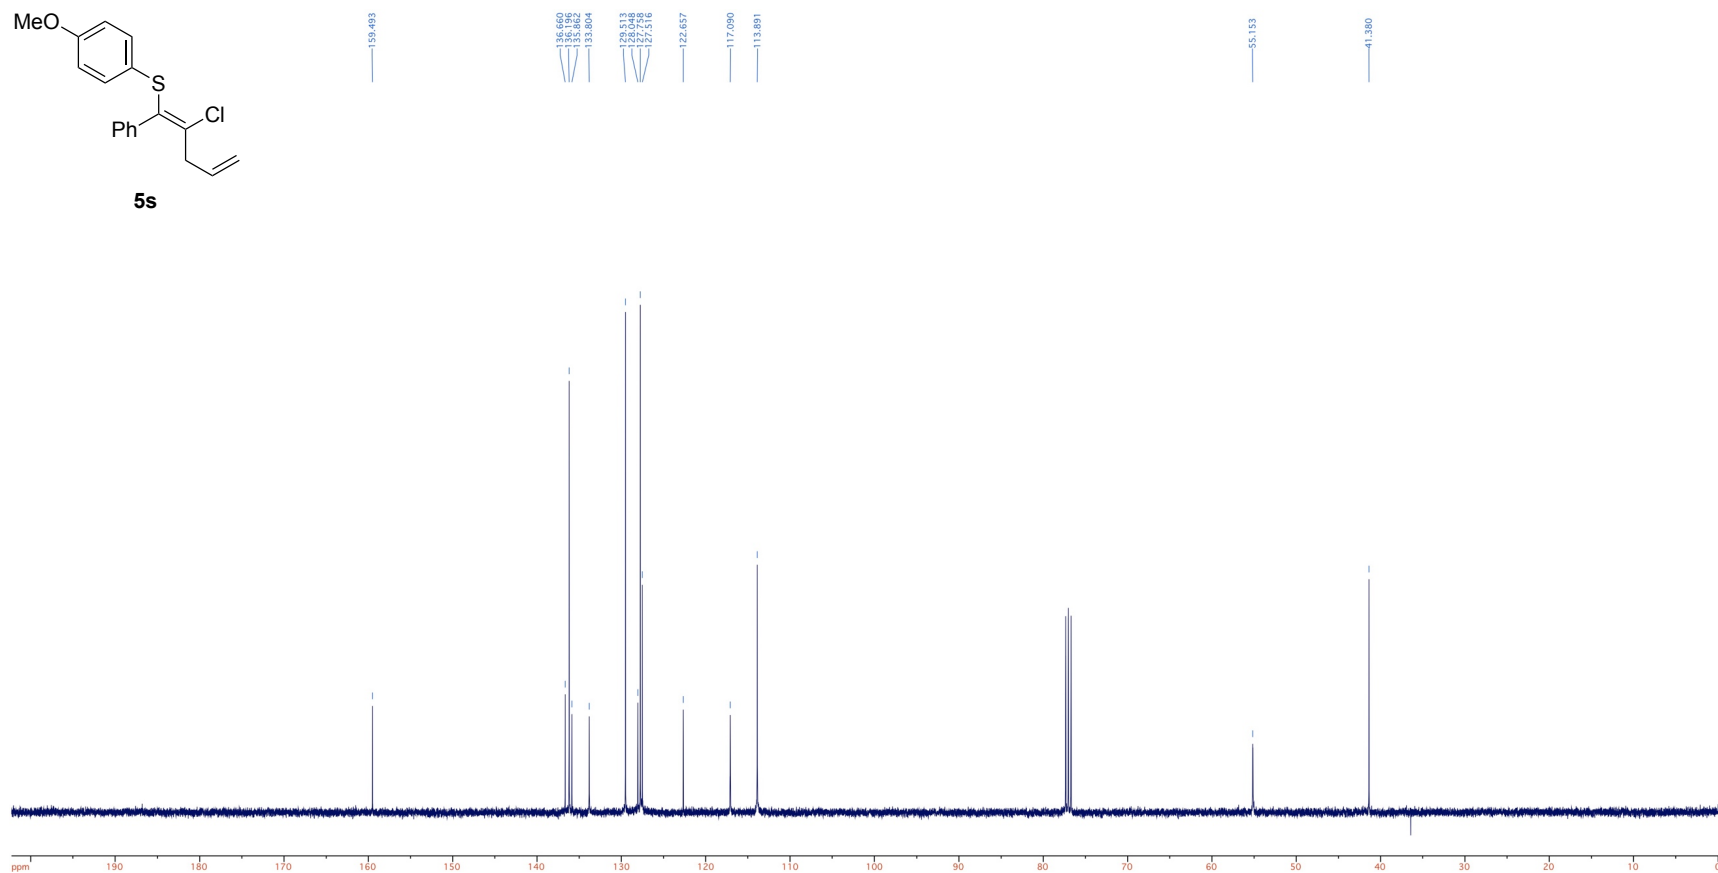

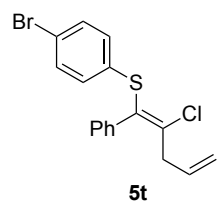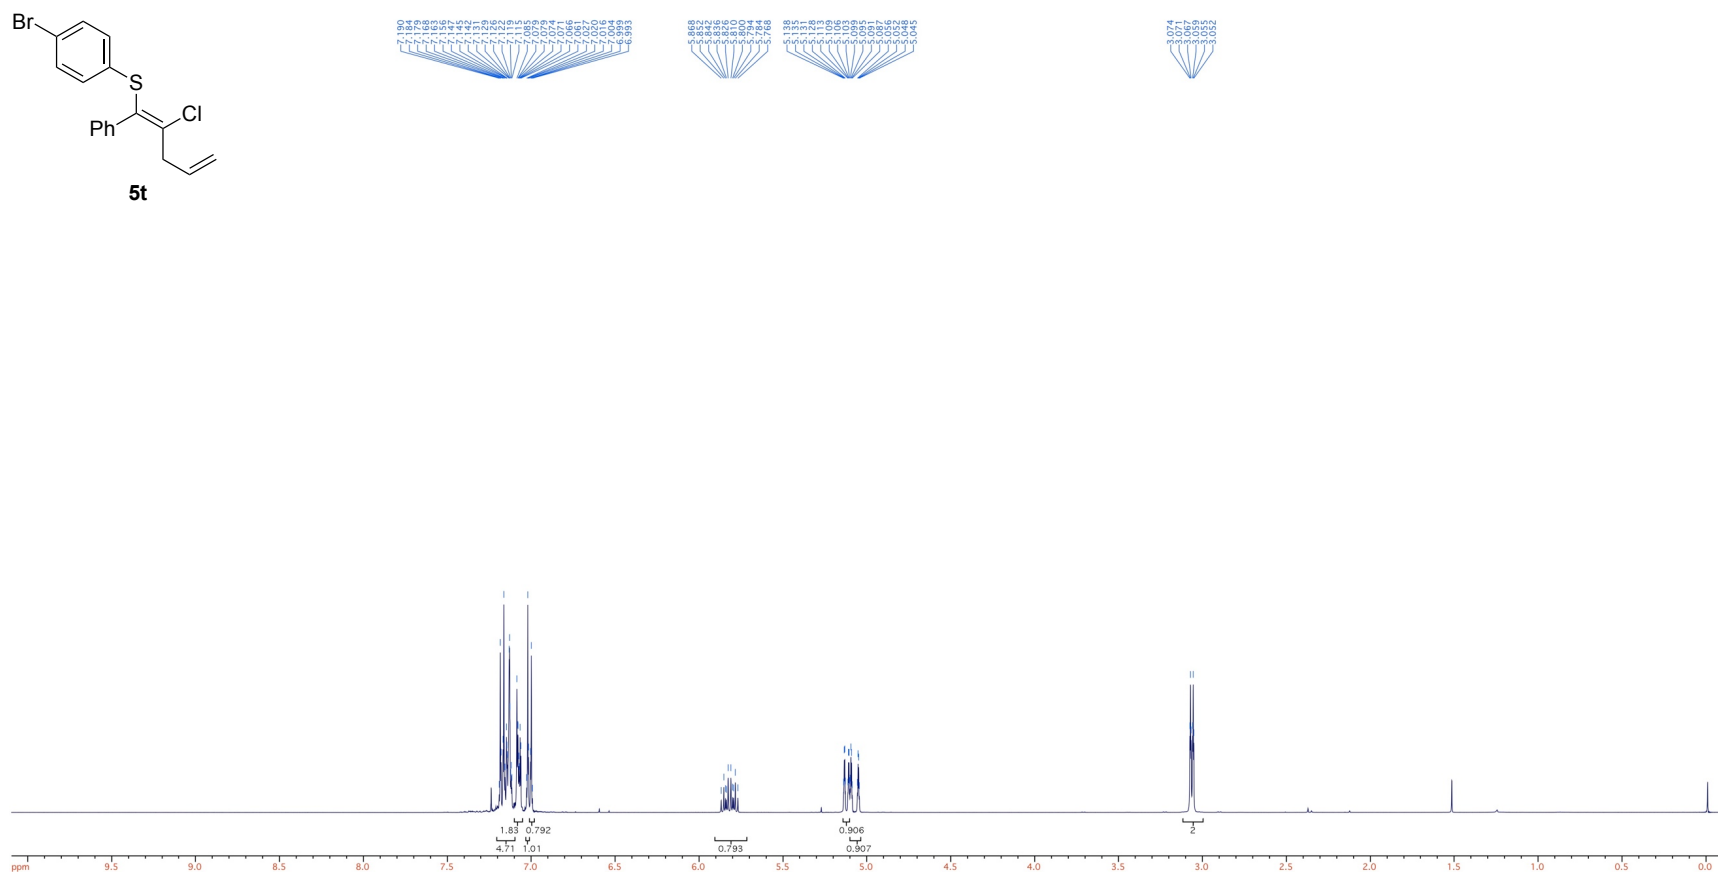

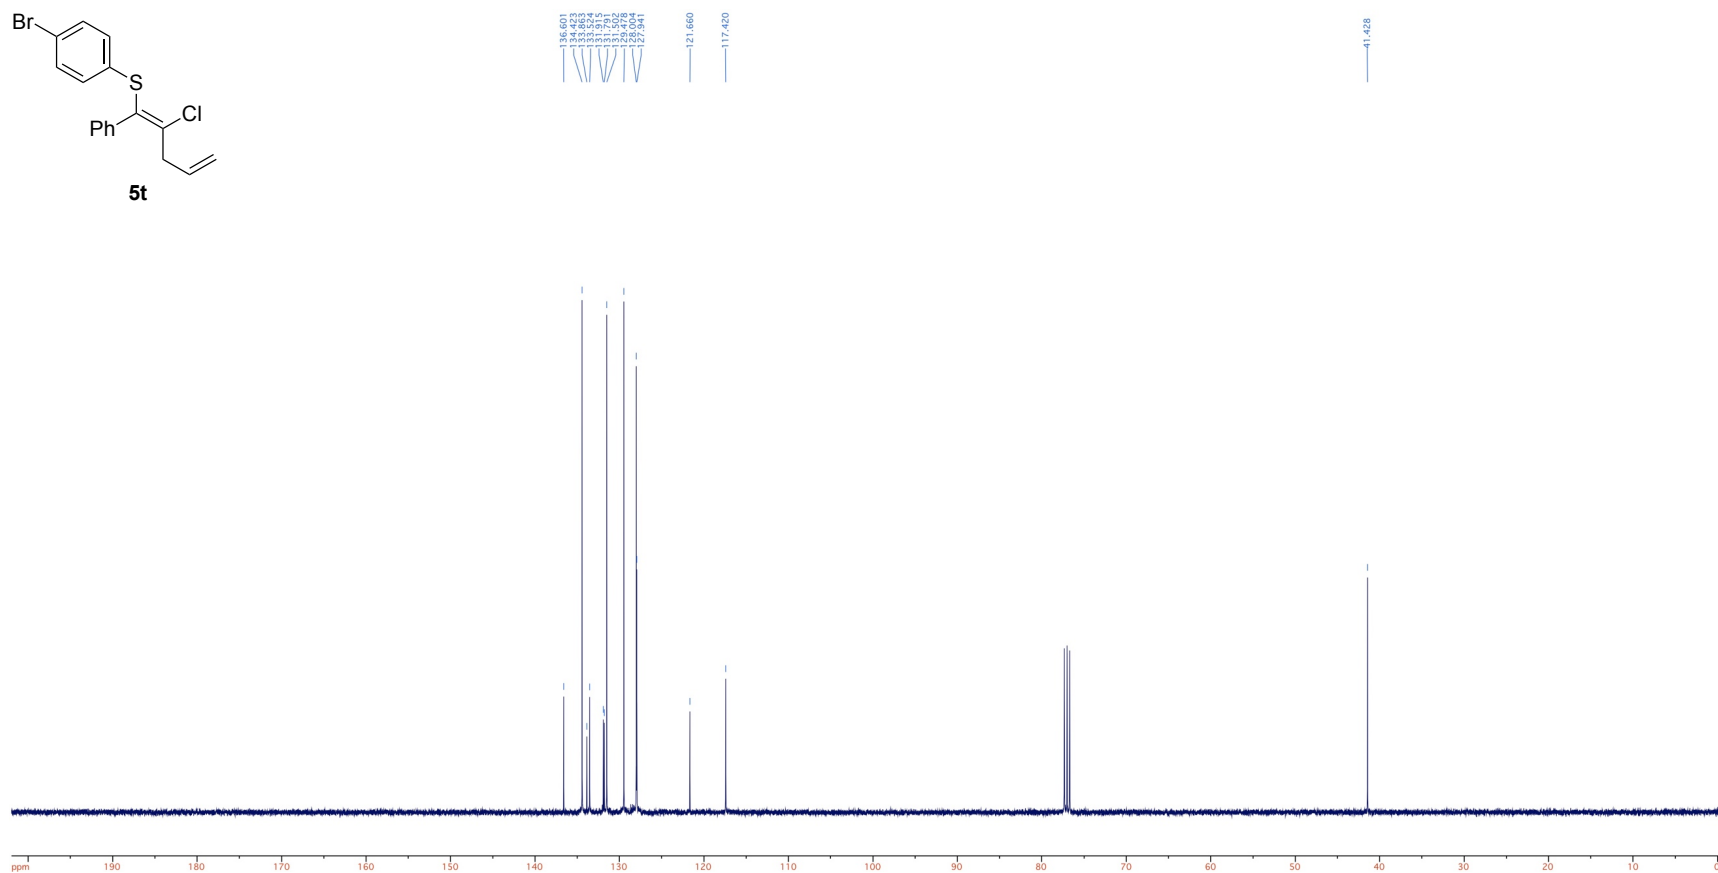

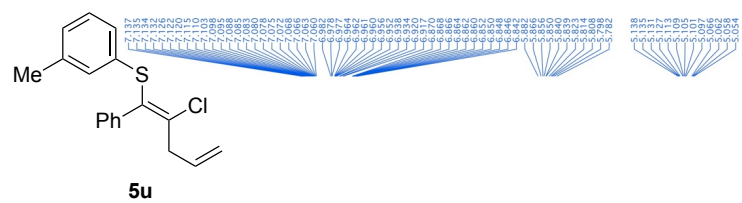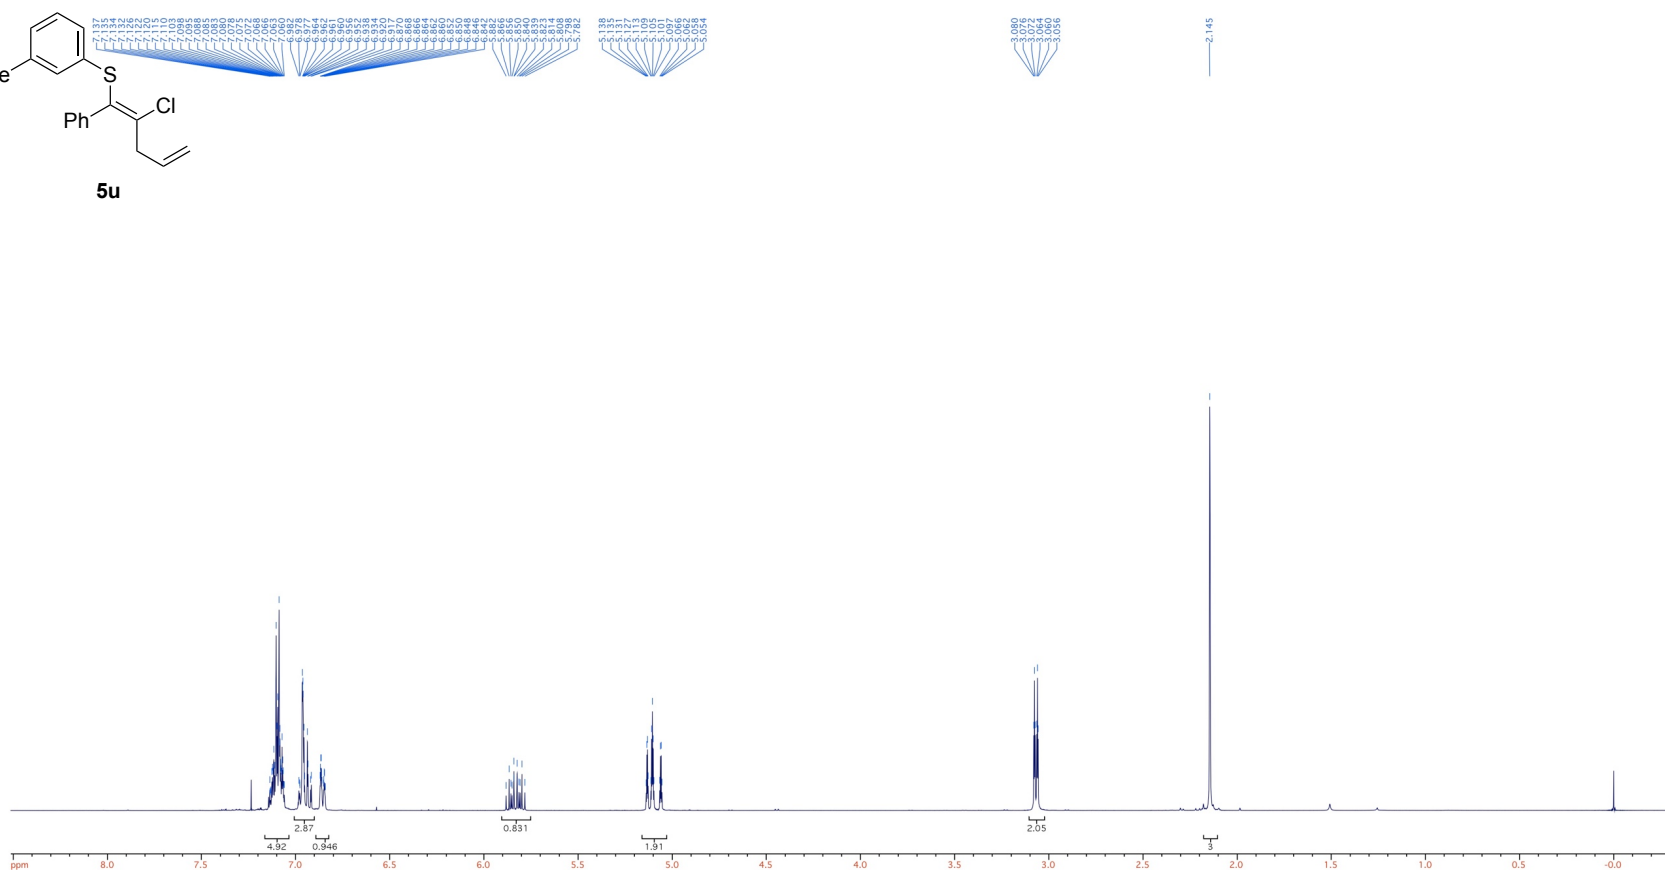

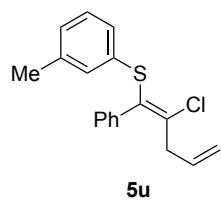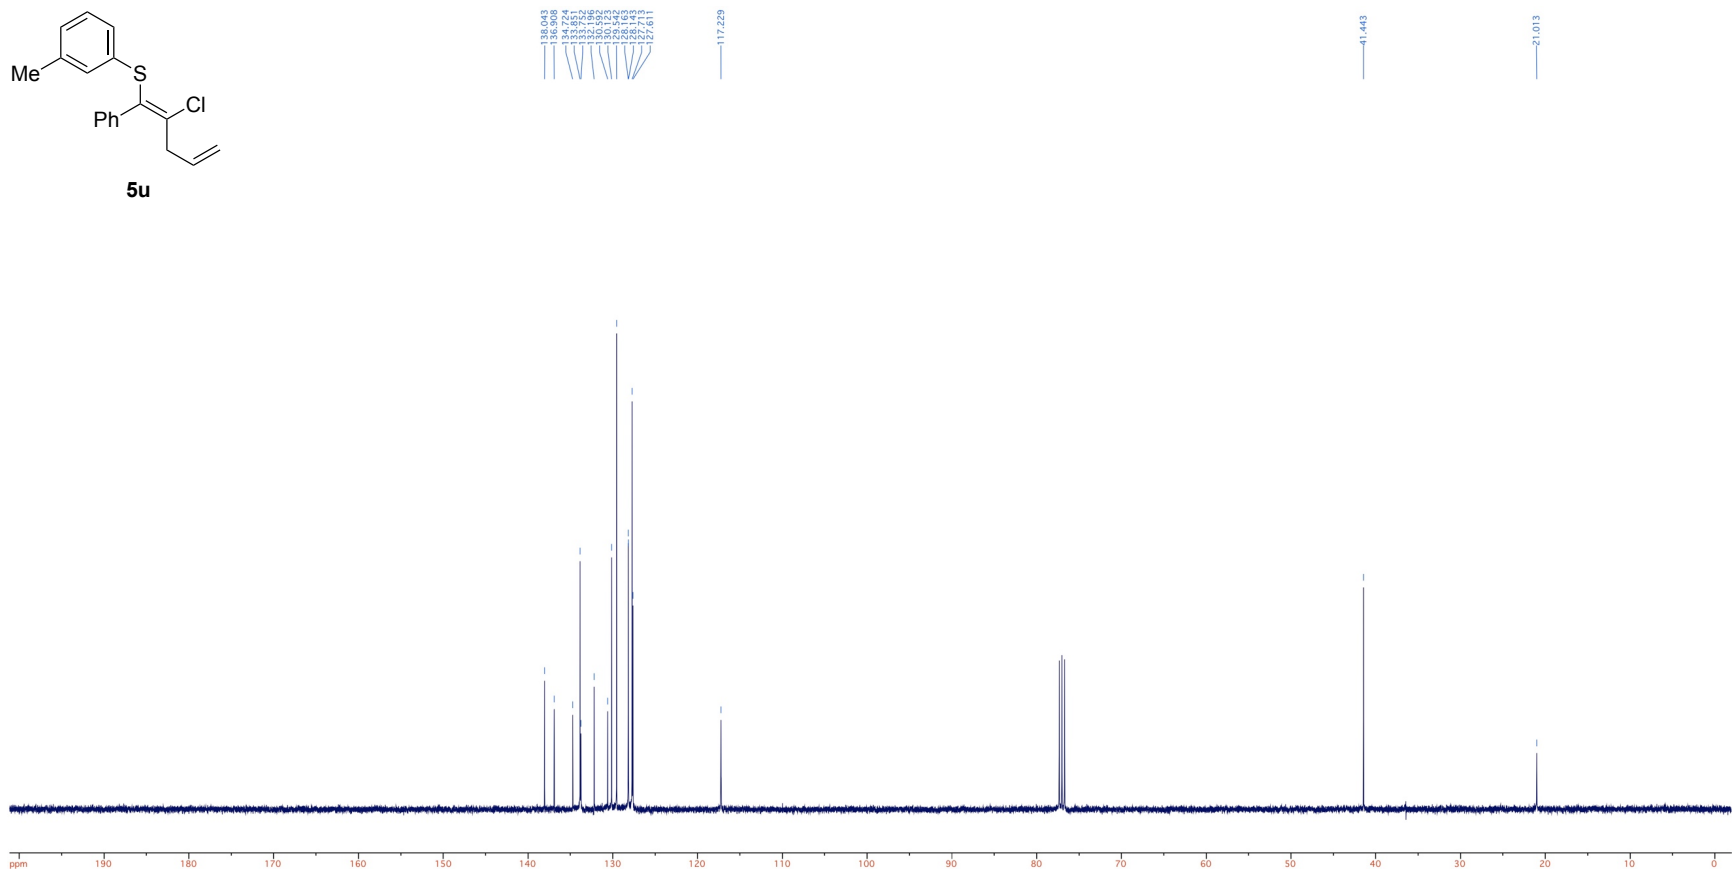





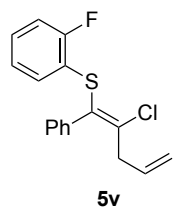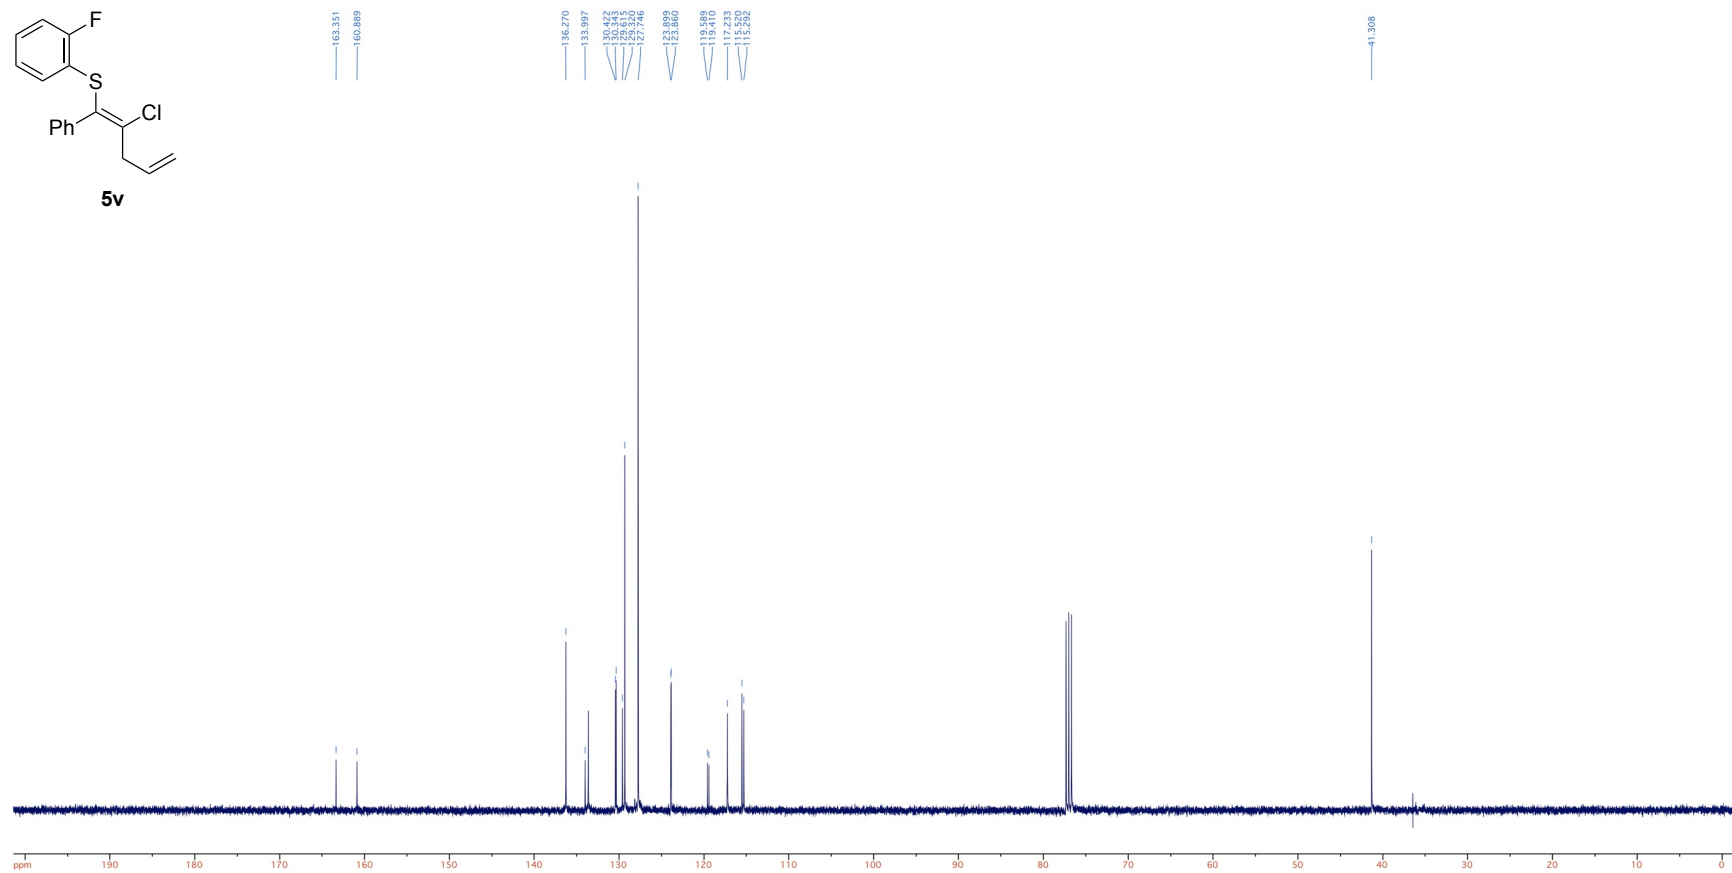



106.986  
106.985  
106.984  
106.983  
106.982

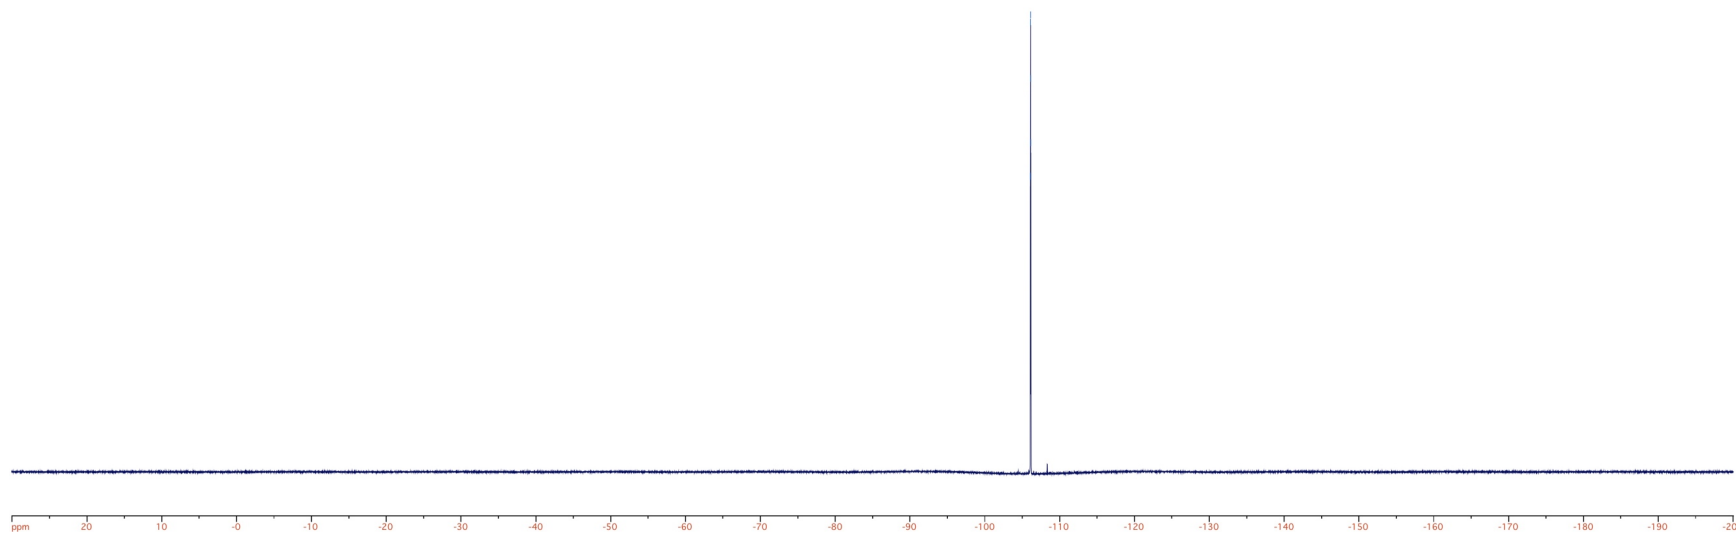

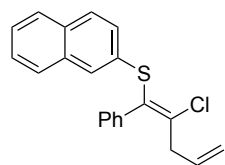

5w

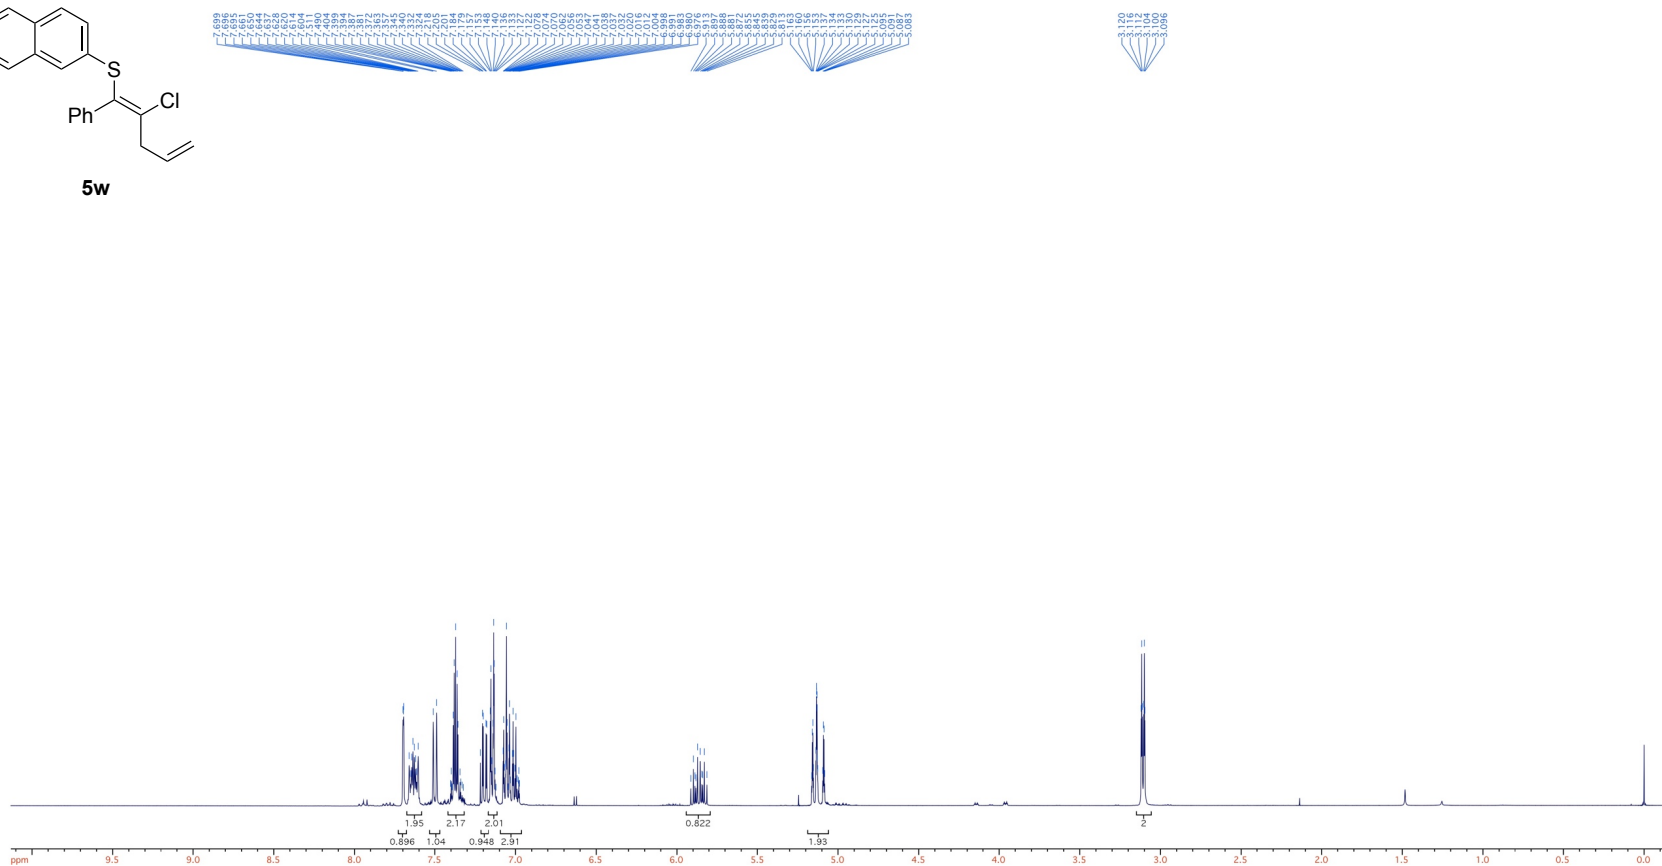



5w

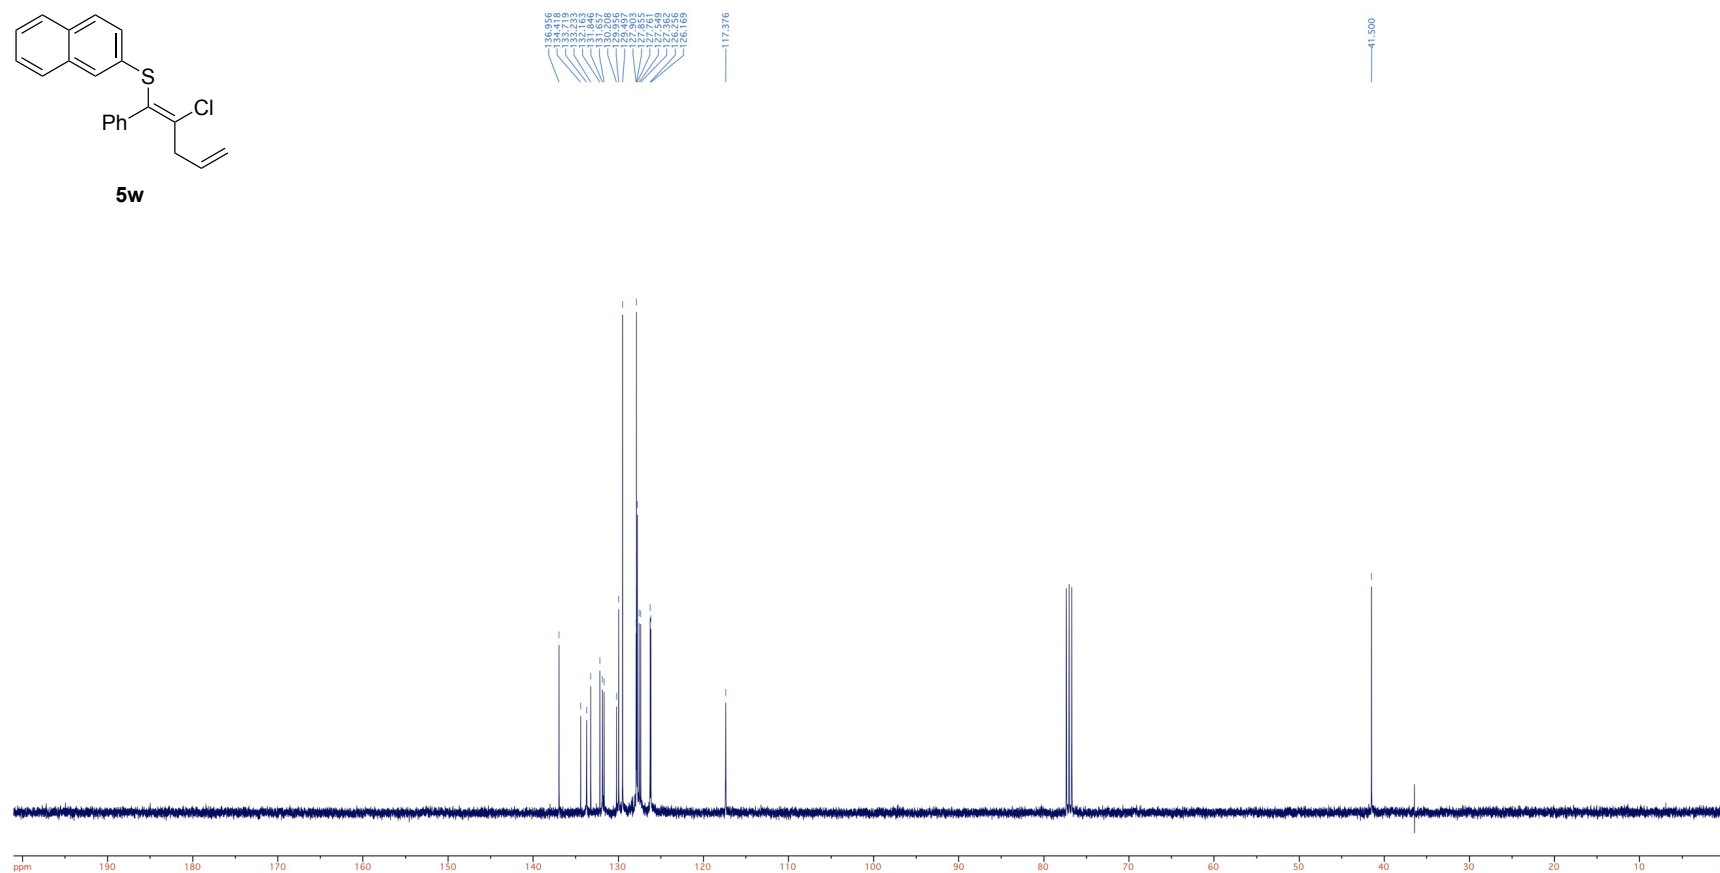

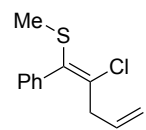

5x

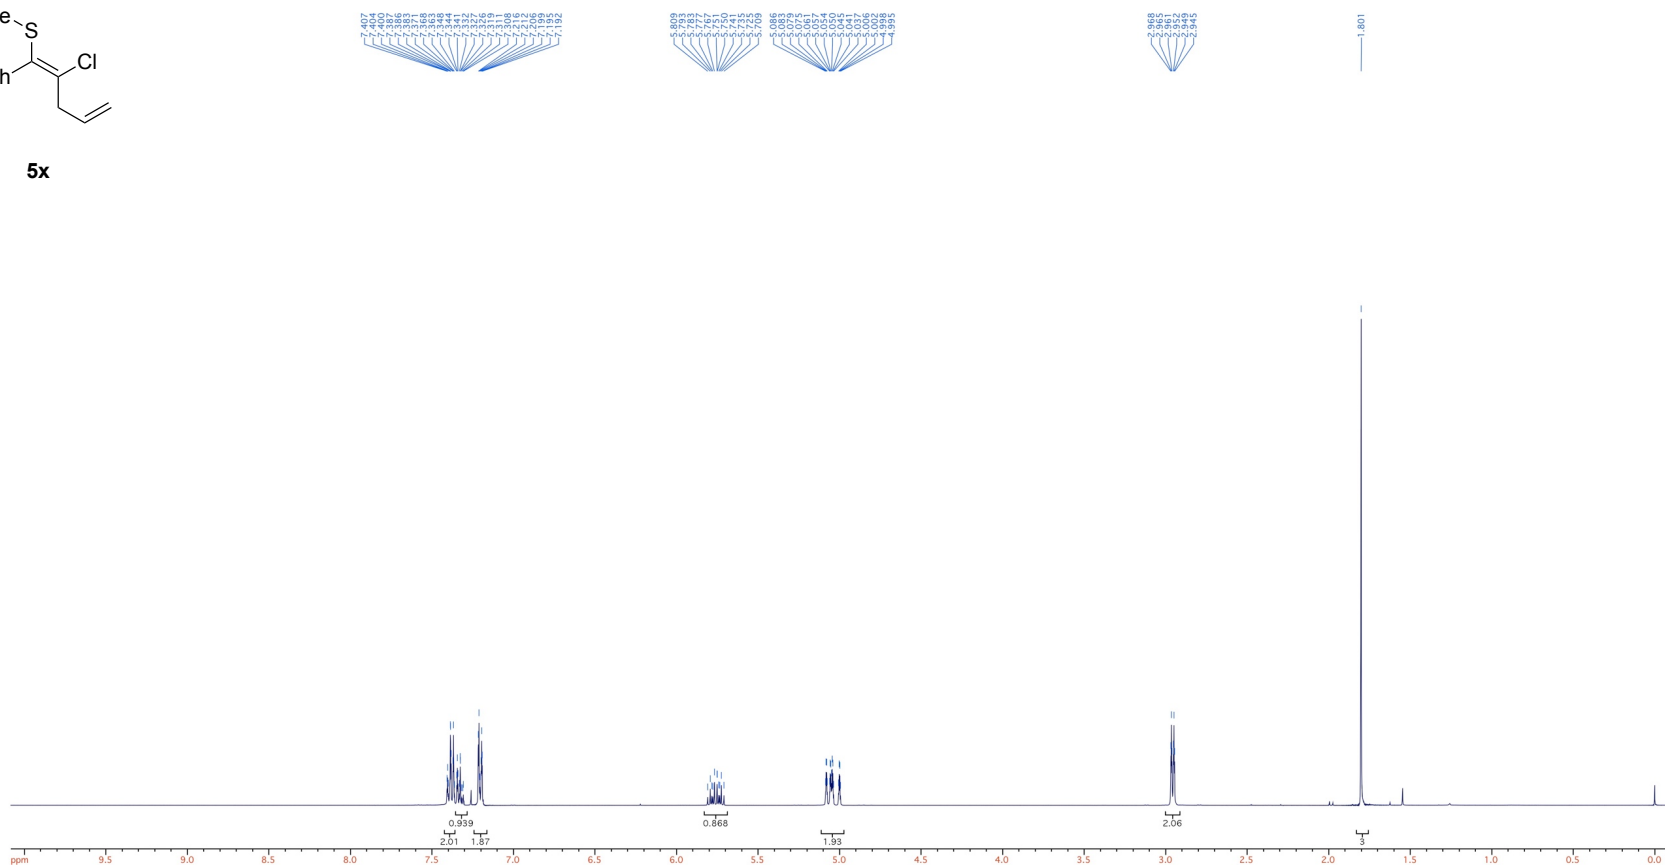

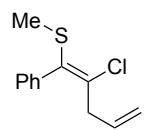

5x

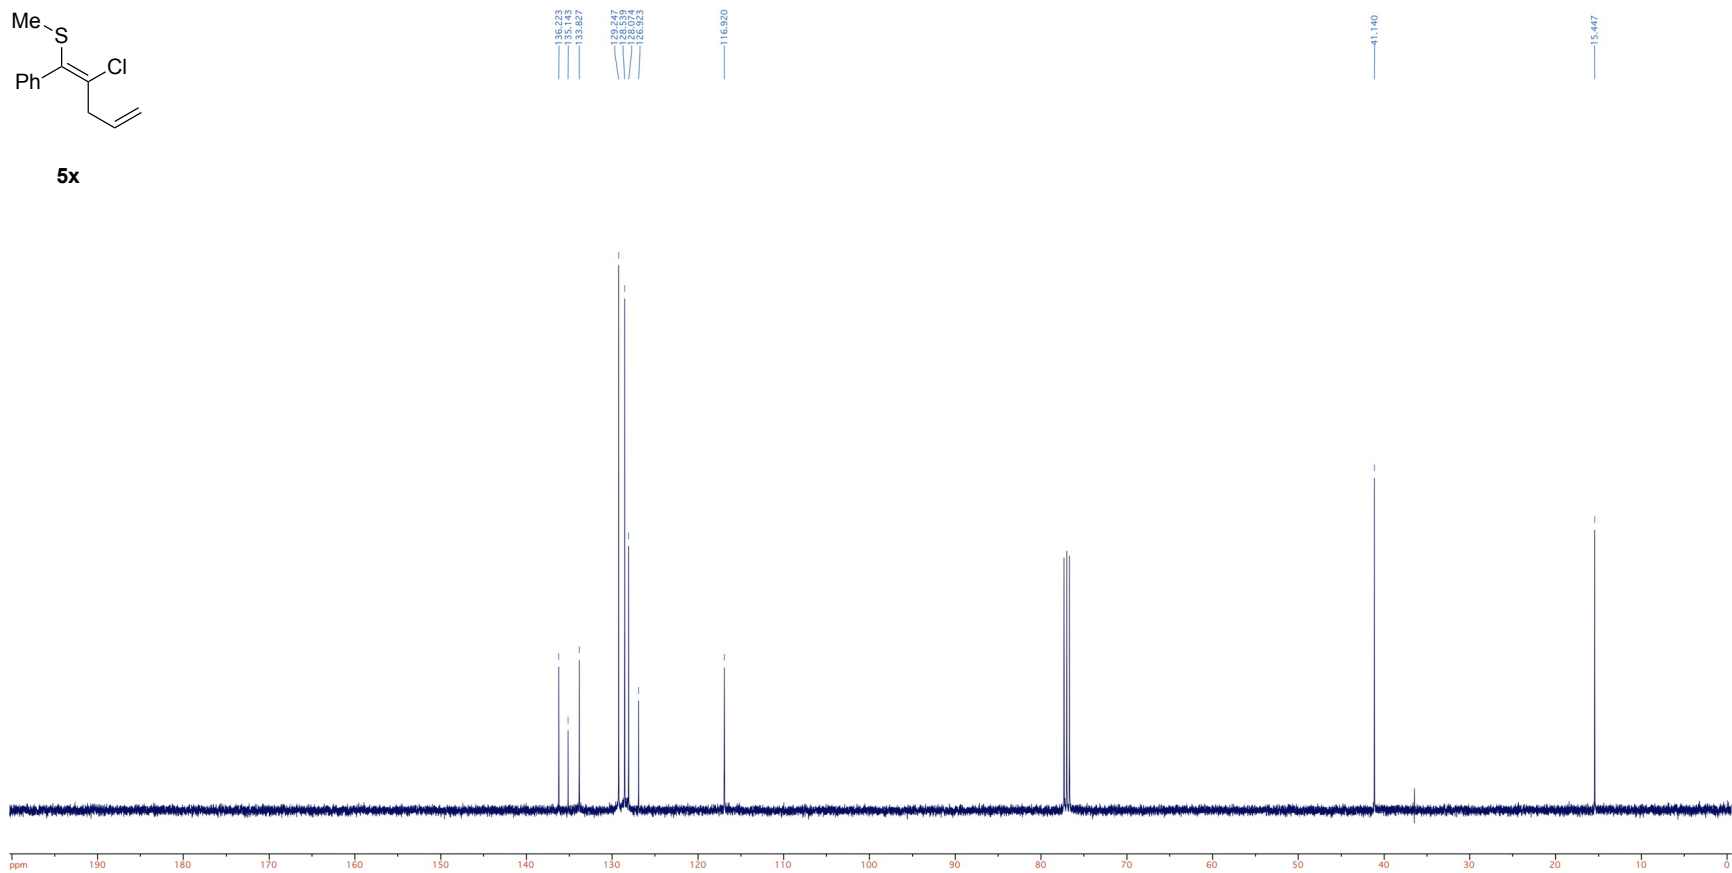

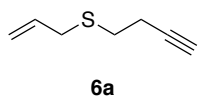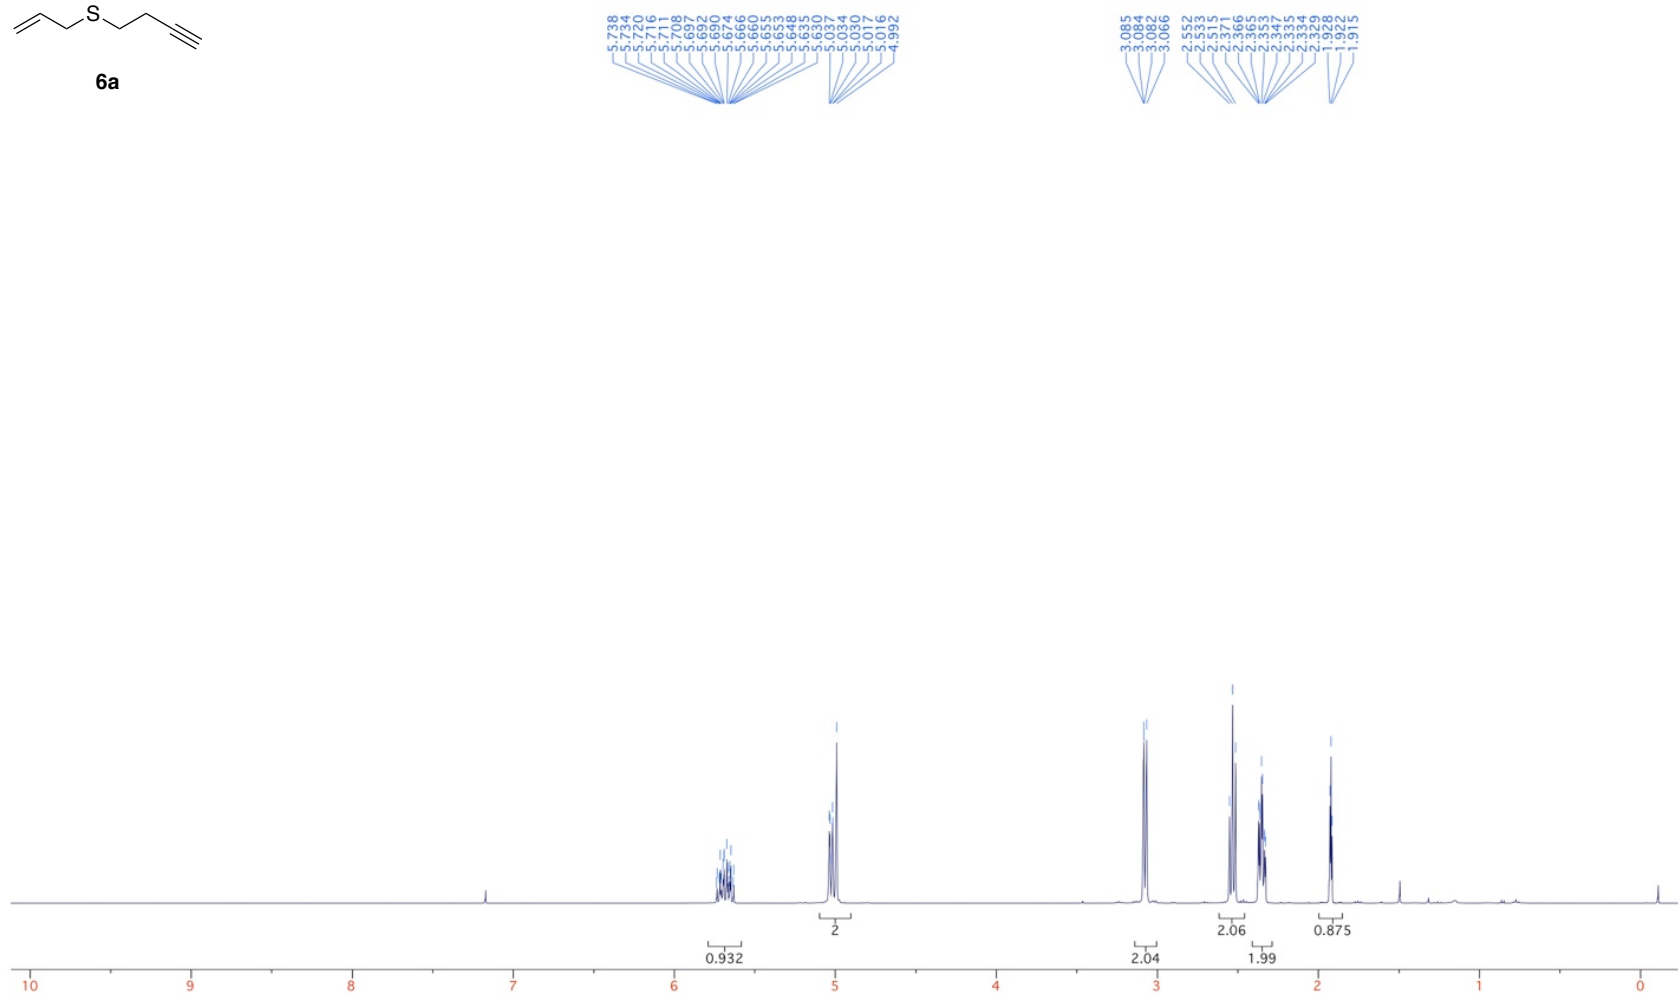



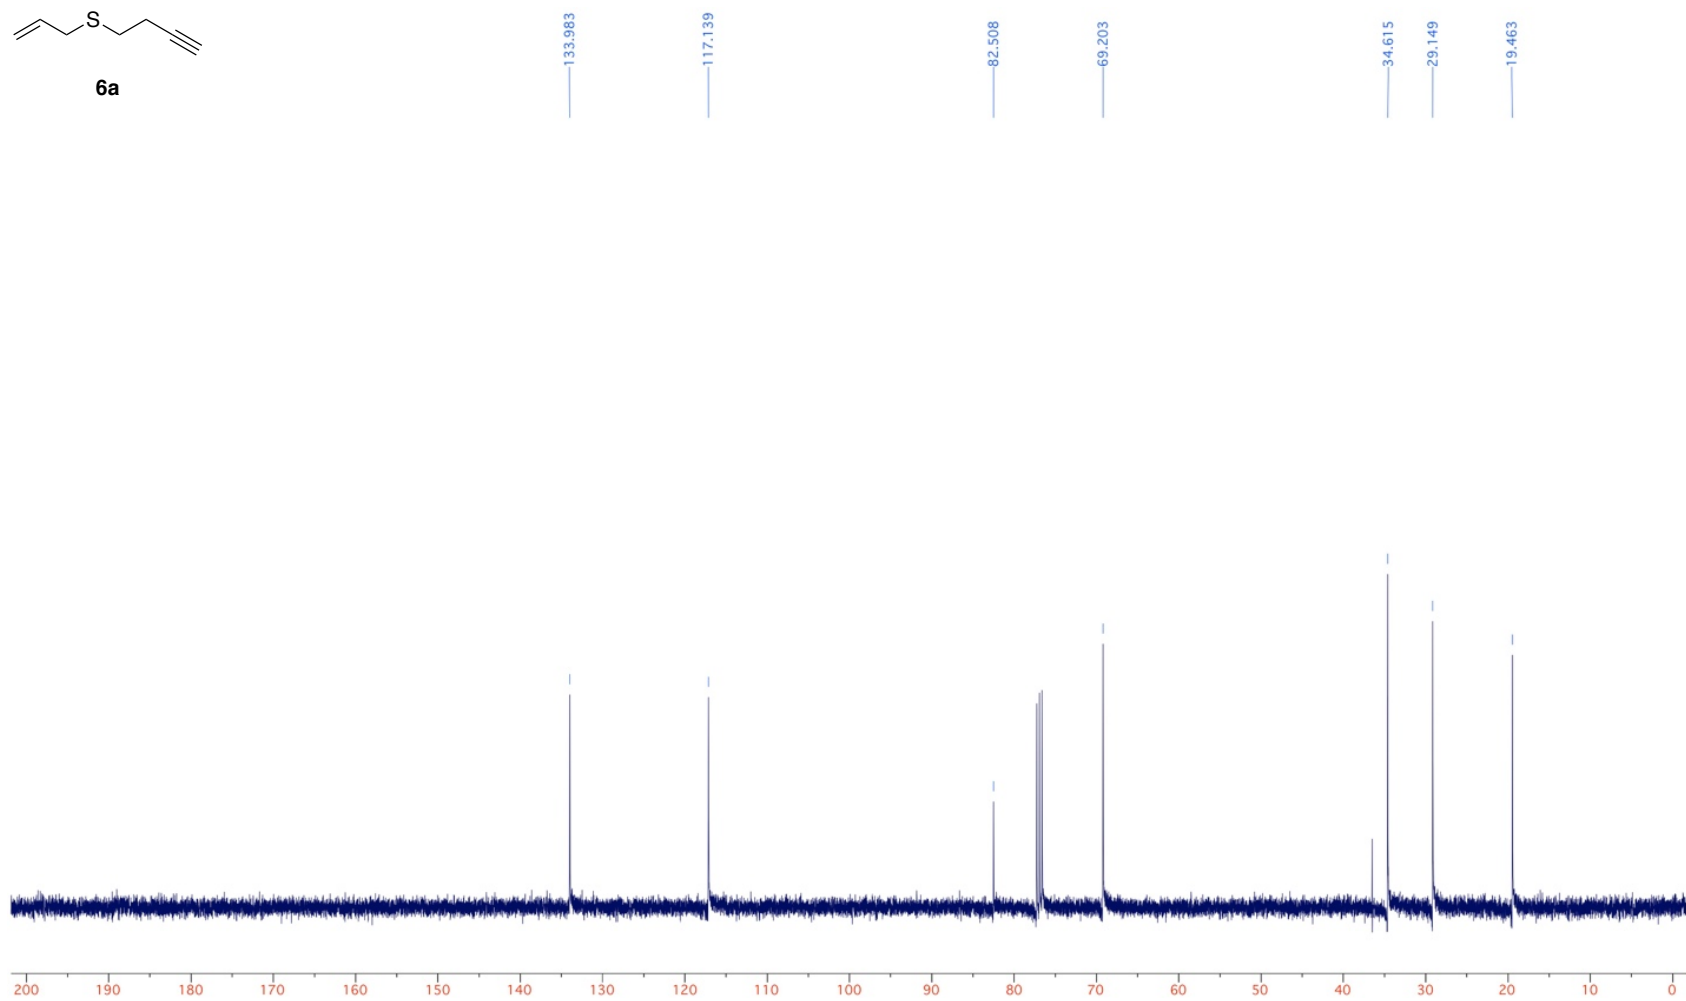

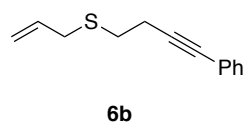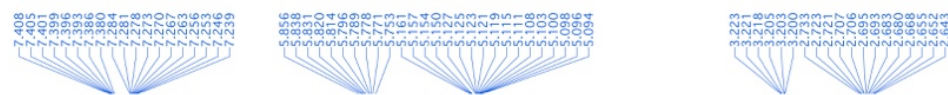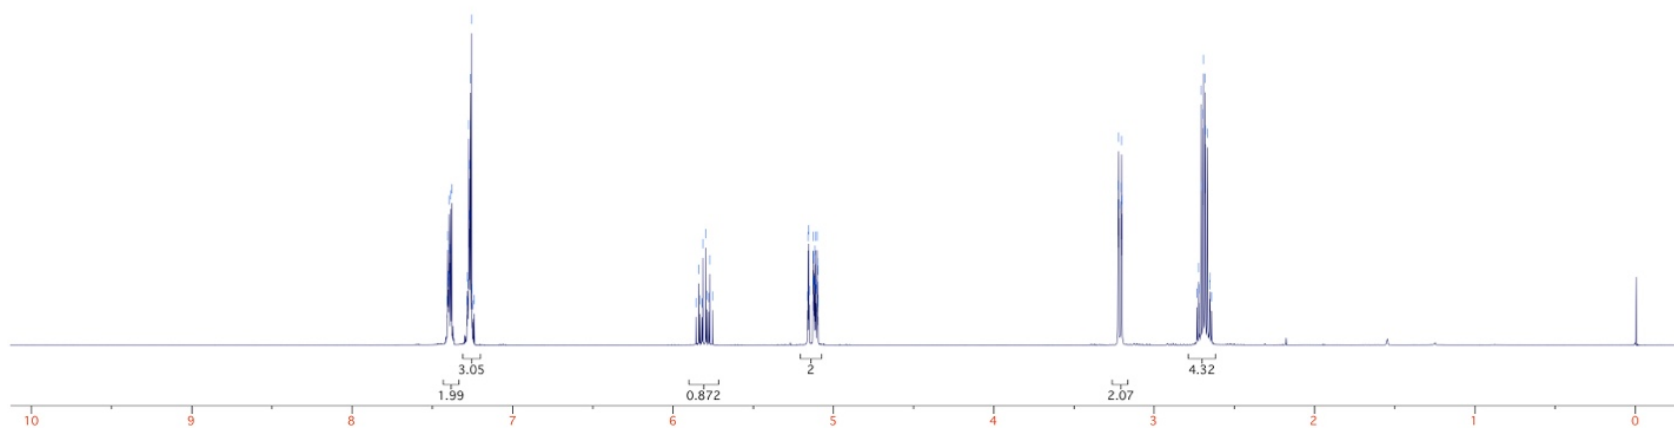

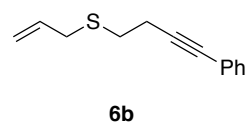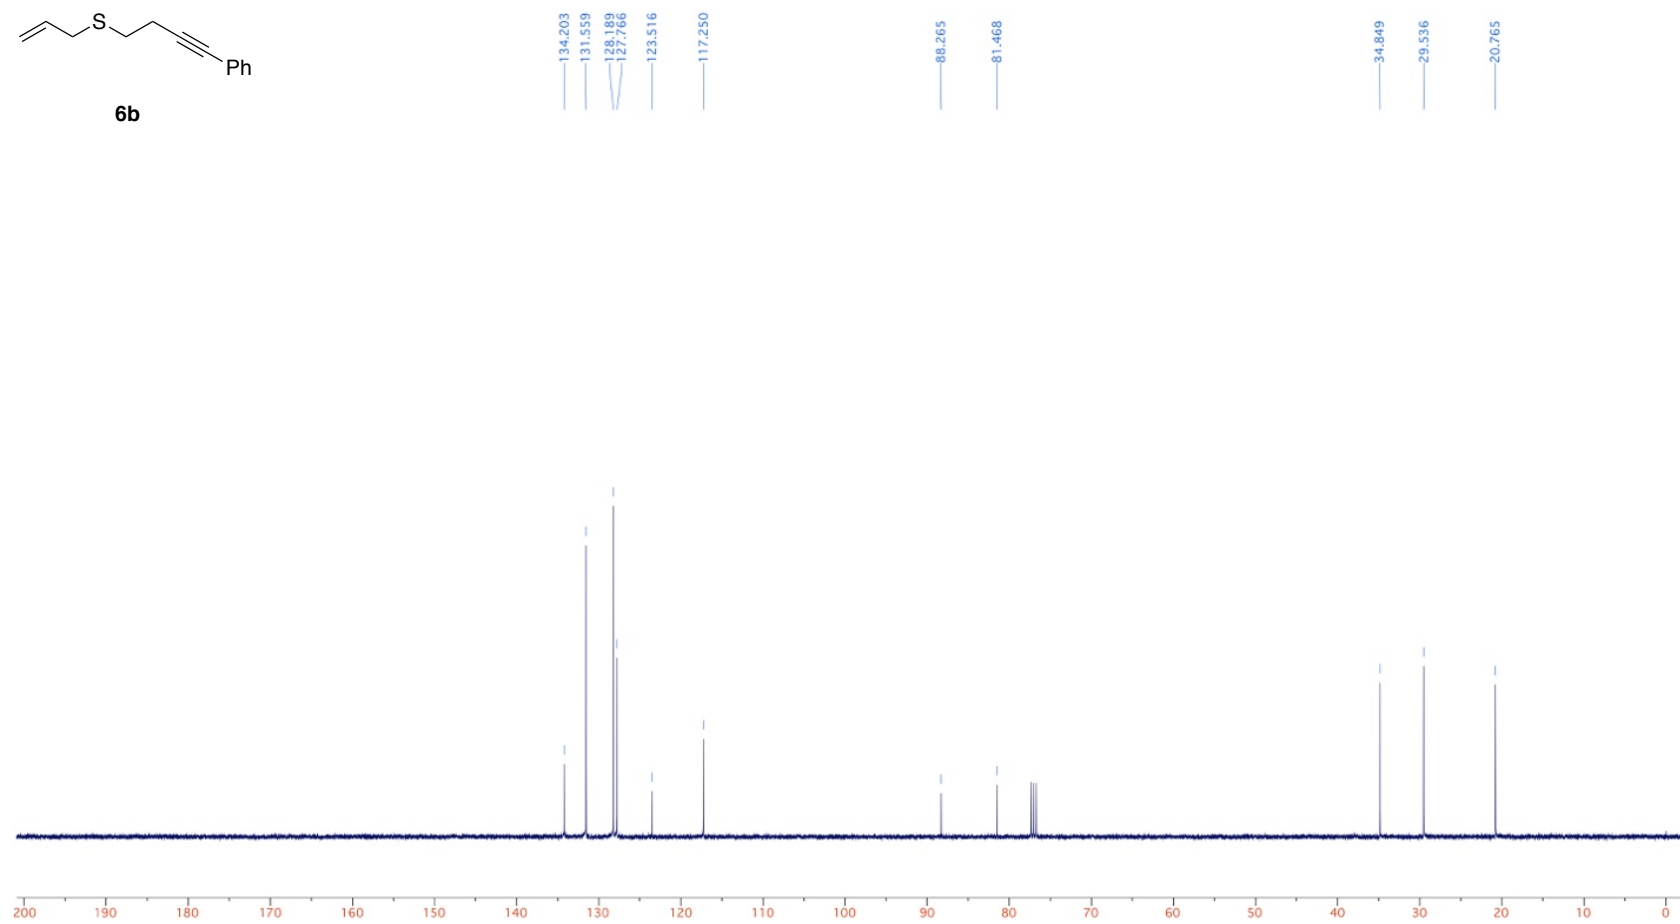

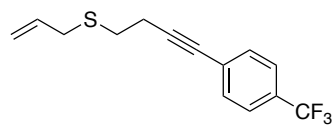

6c

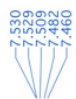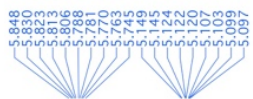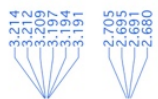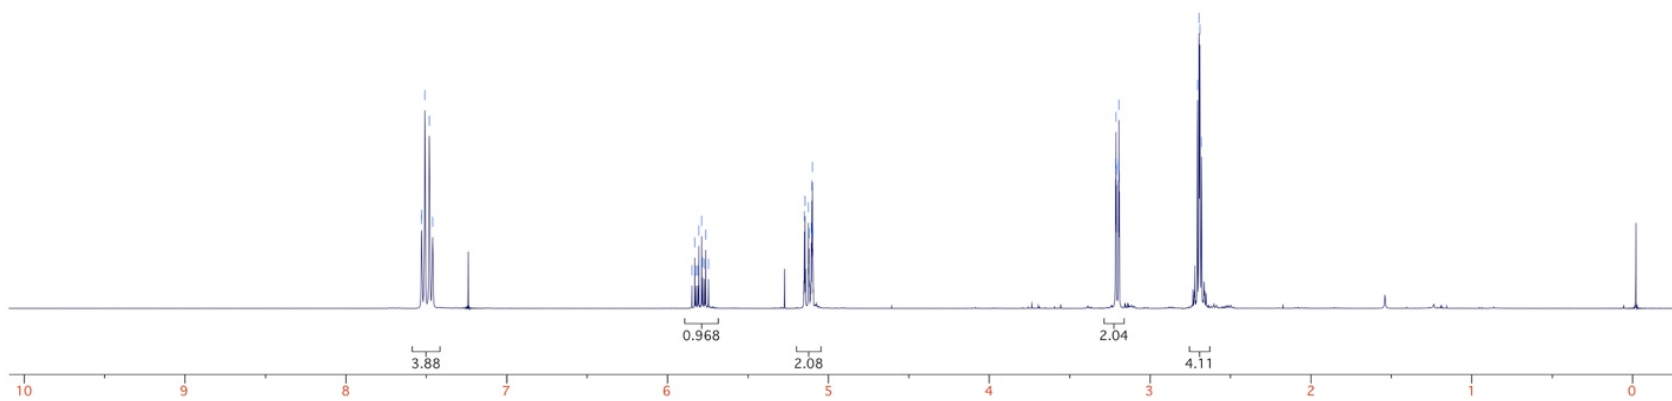



6c

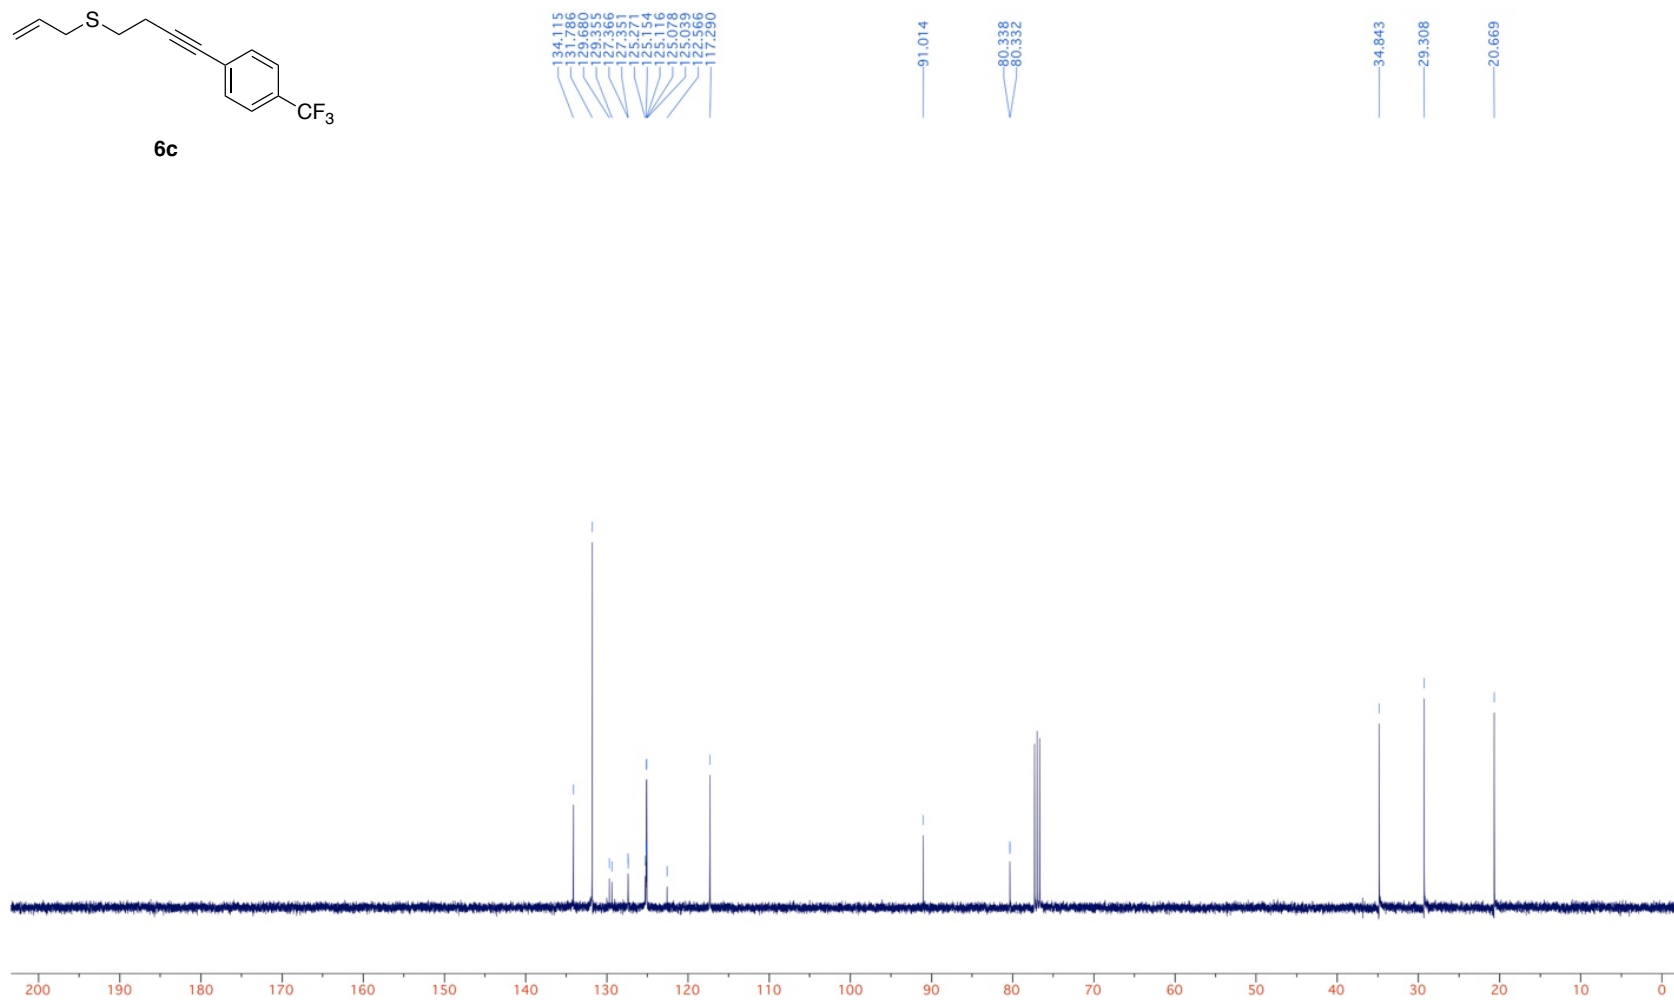

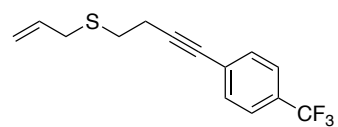

**6c**

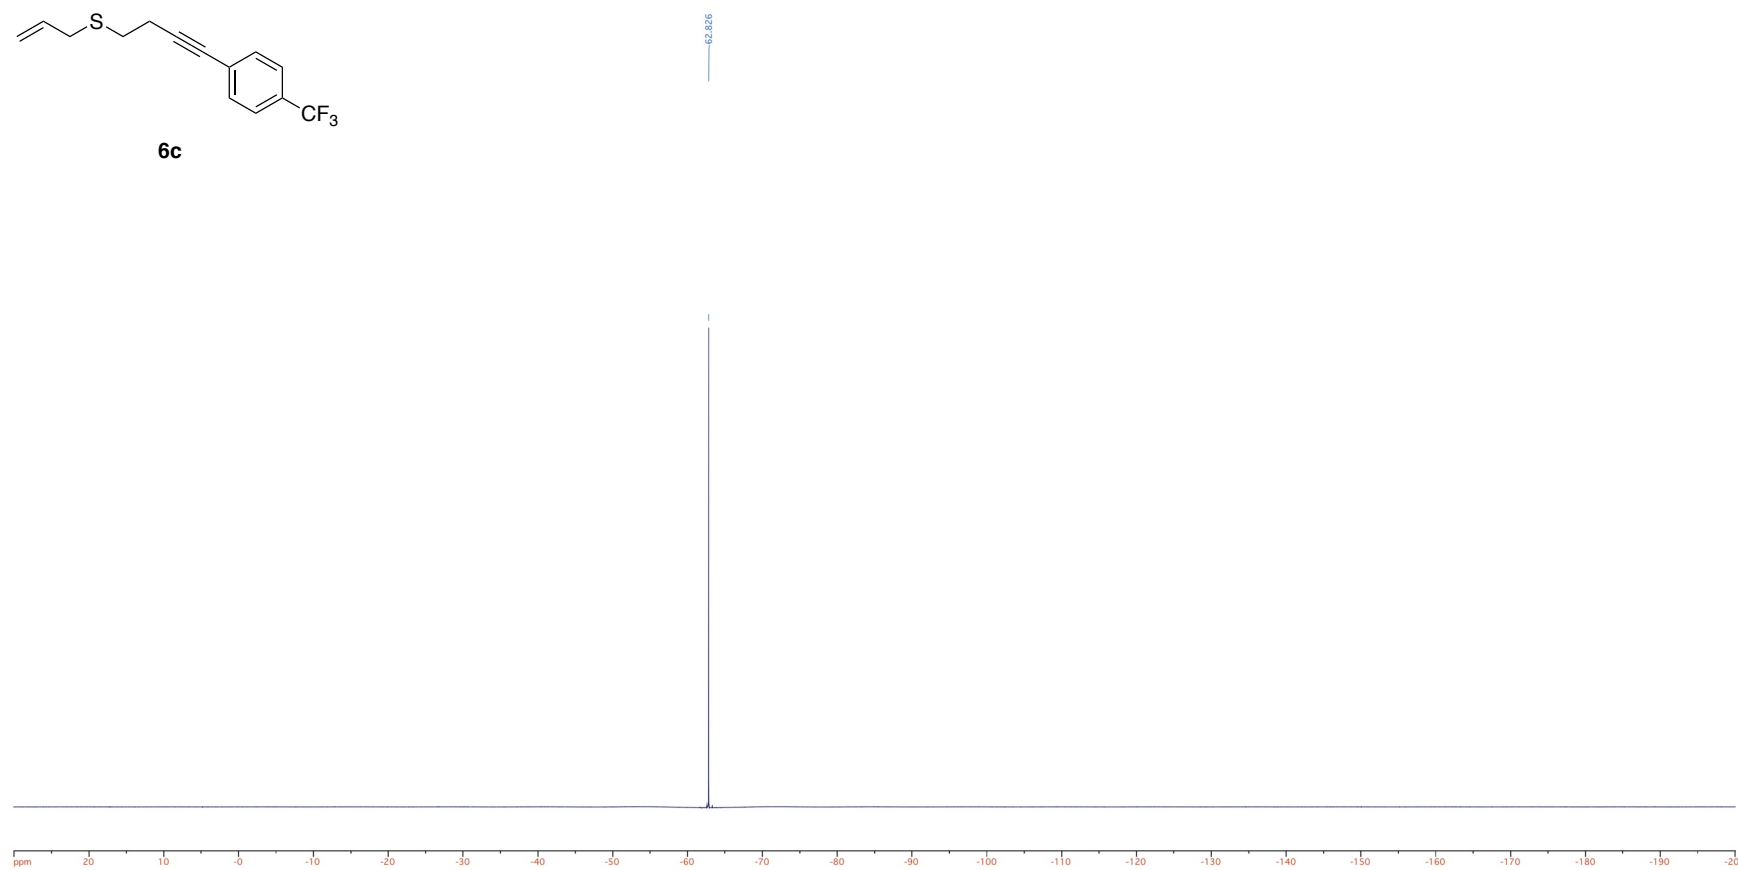



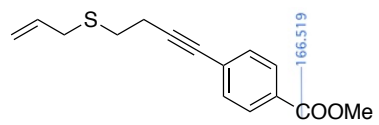

6d

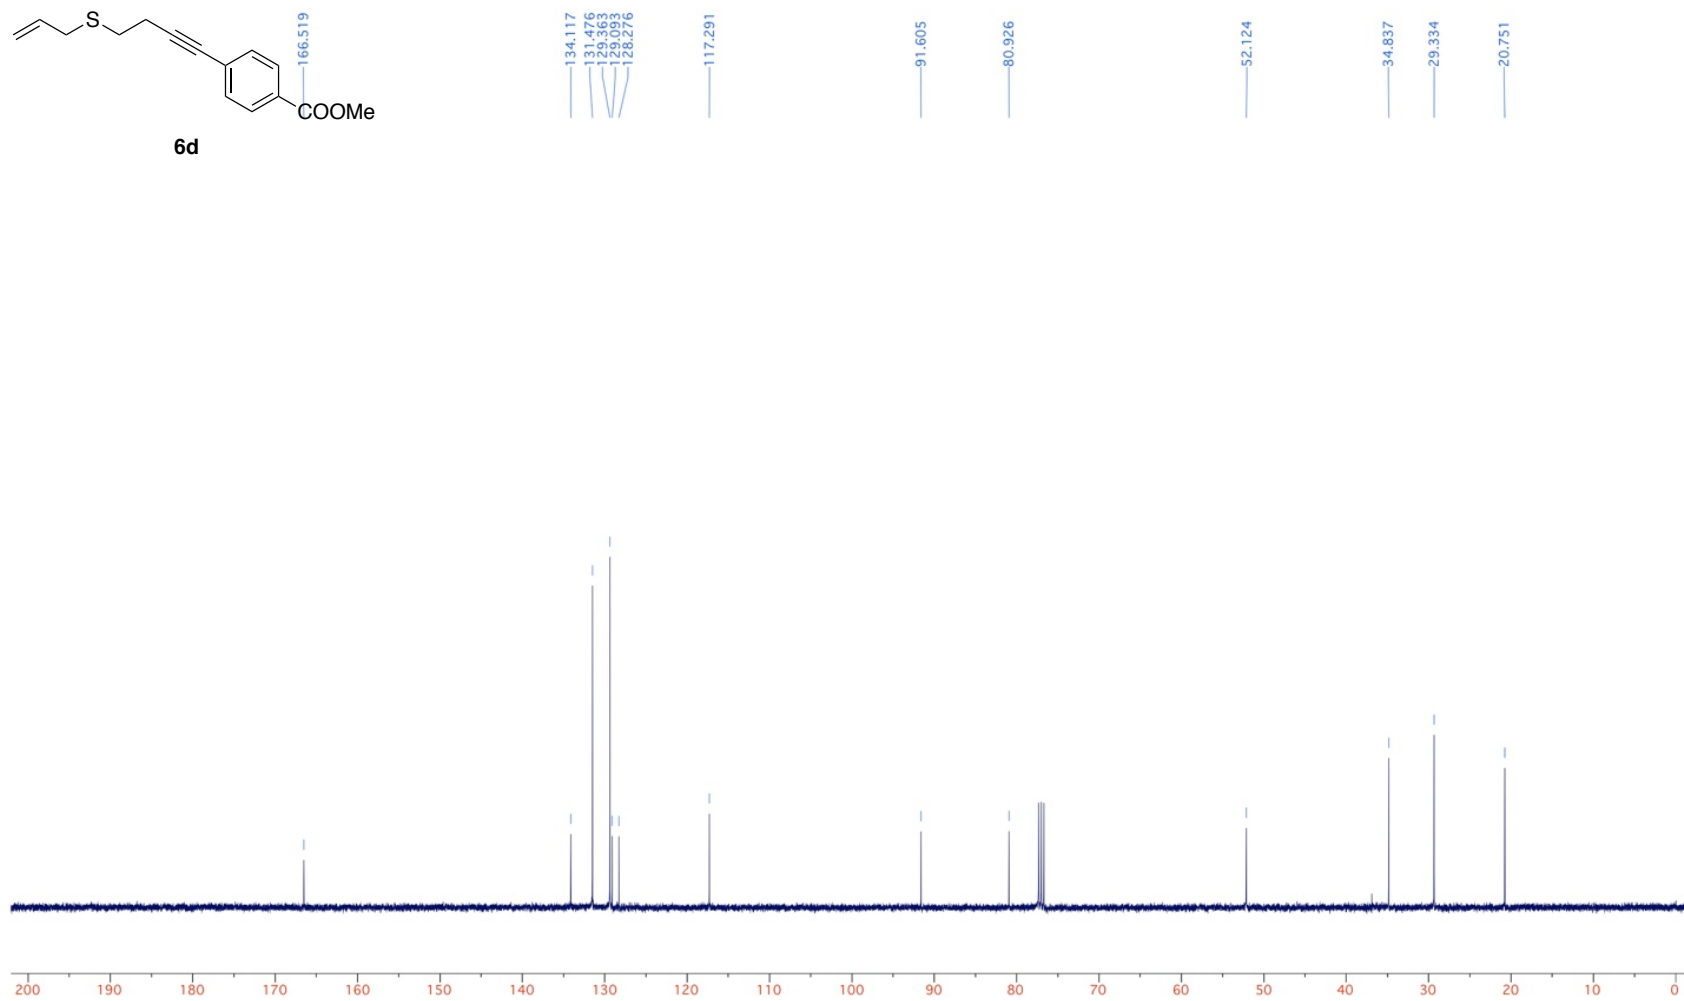



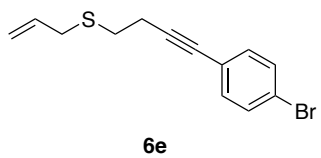

7.404  
7.399  
7.394  
7.382  
7.371  
7.248  
7.242  
7.237  
7.221

5.821  
5.796  
5.779  
5.754  
5.729  
5.712  
5.695  
5.678  
5.661  
5.644  
5.627  
5.610  
5.593  
5.576  
5.559  
5.542  
5.525

2.03  
2.00  
1.98  
1.85  
1.82  
1.80  
1.708  
1.695  
1.683  
1.671  
1.654  
1.638  
1.627  
1.614

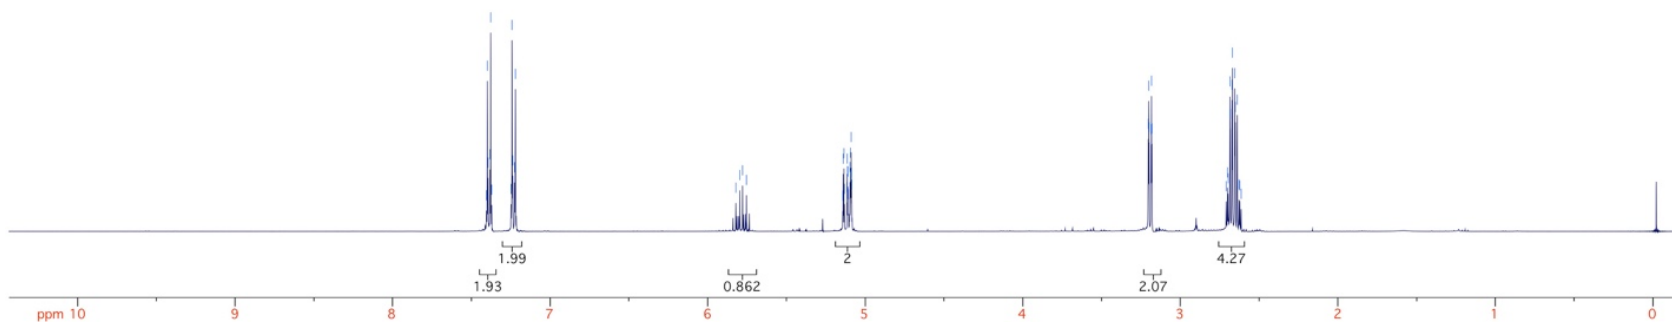

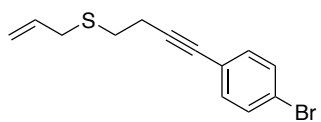

6e

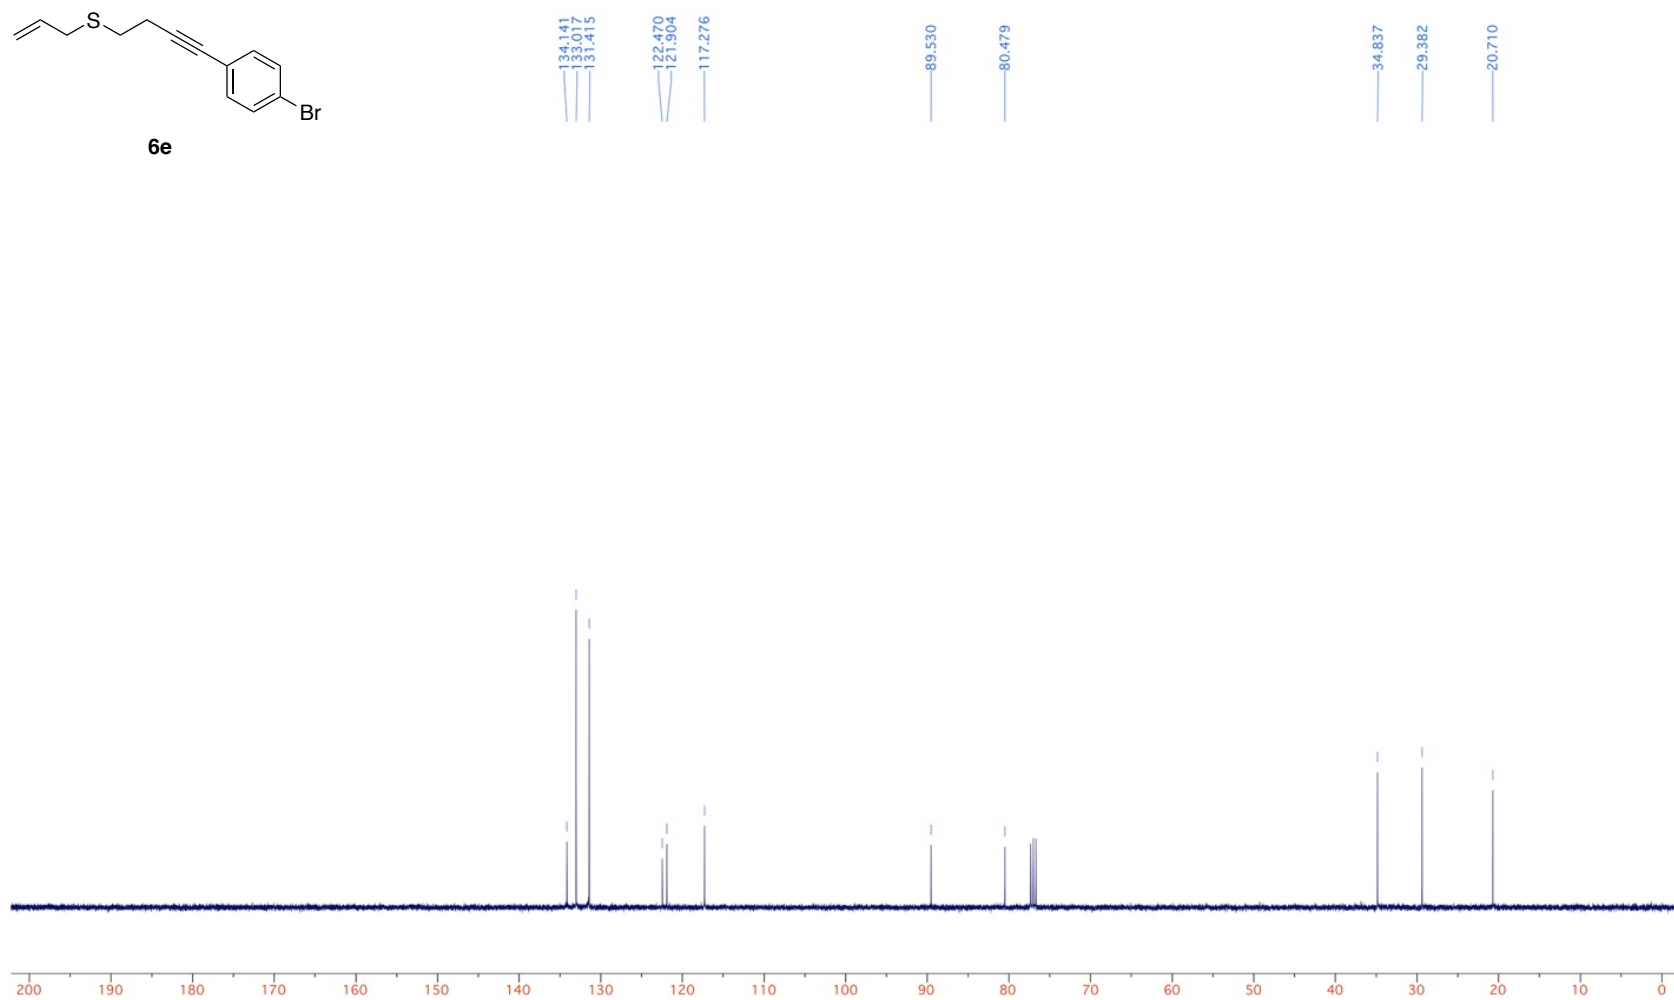

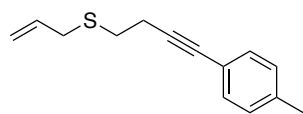

**6f**

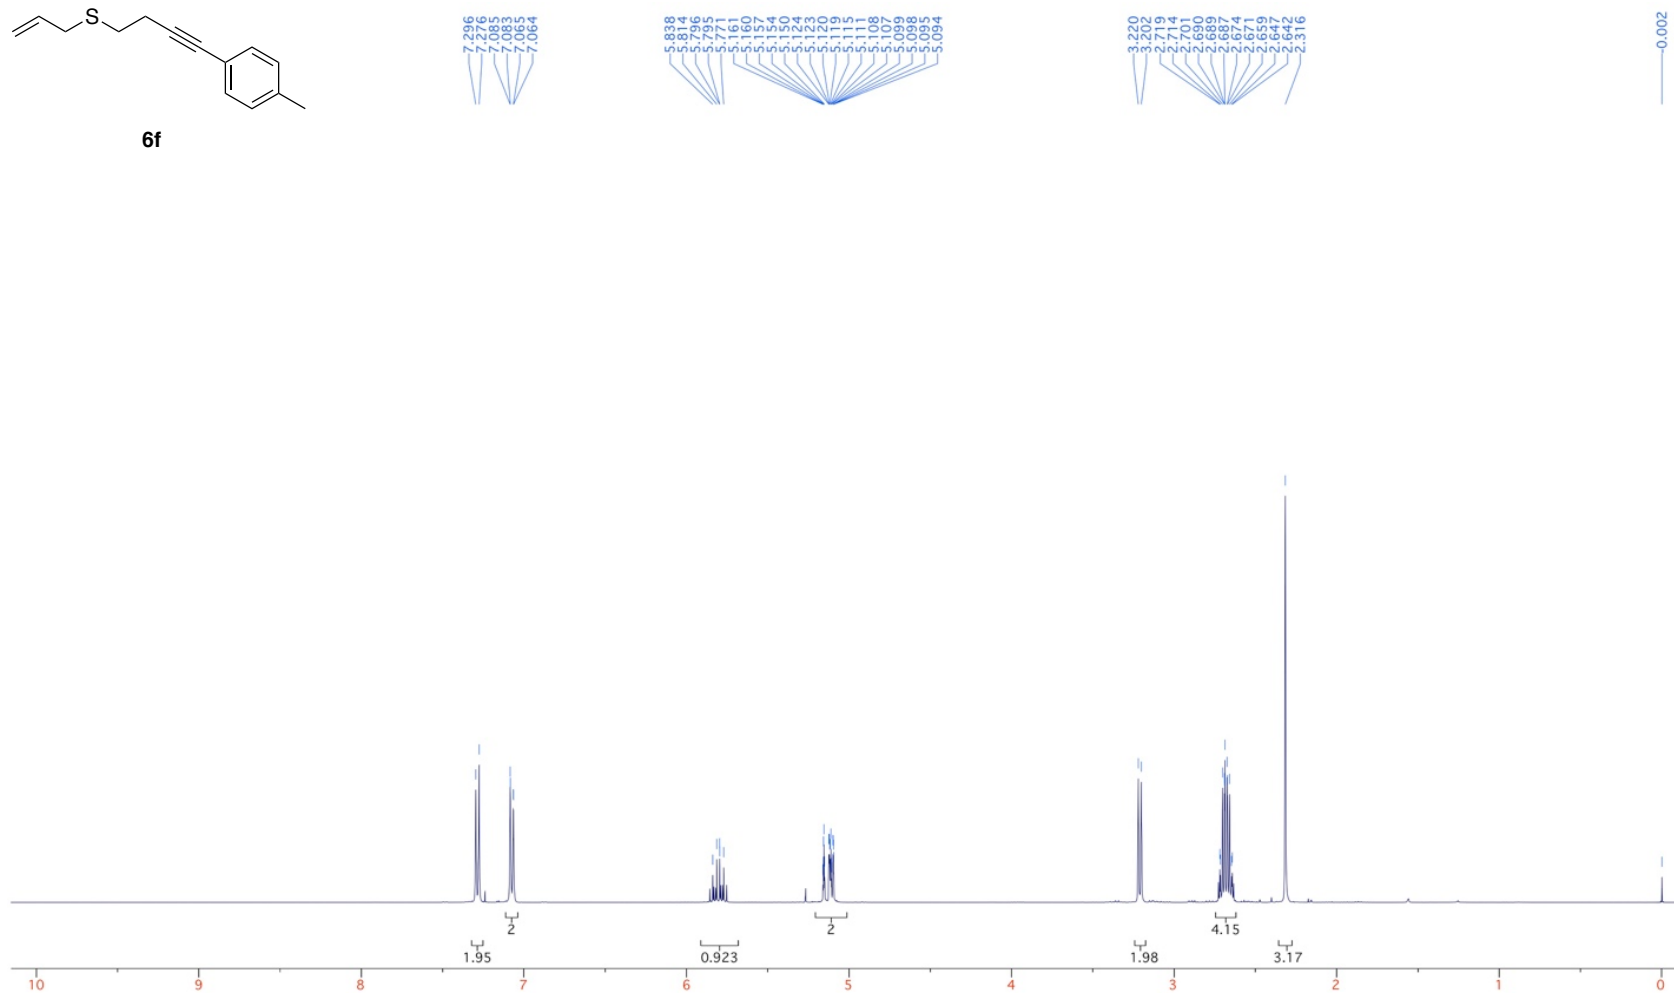



6f

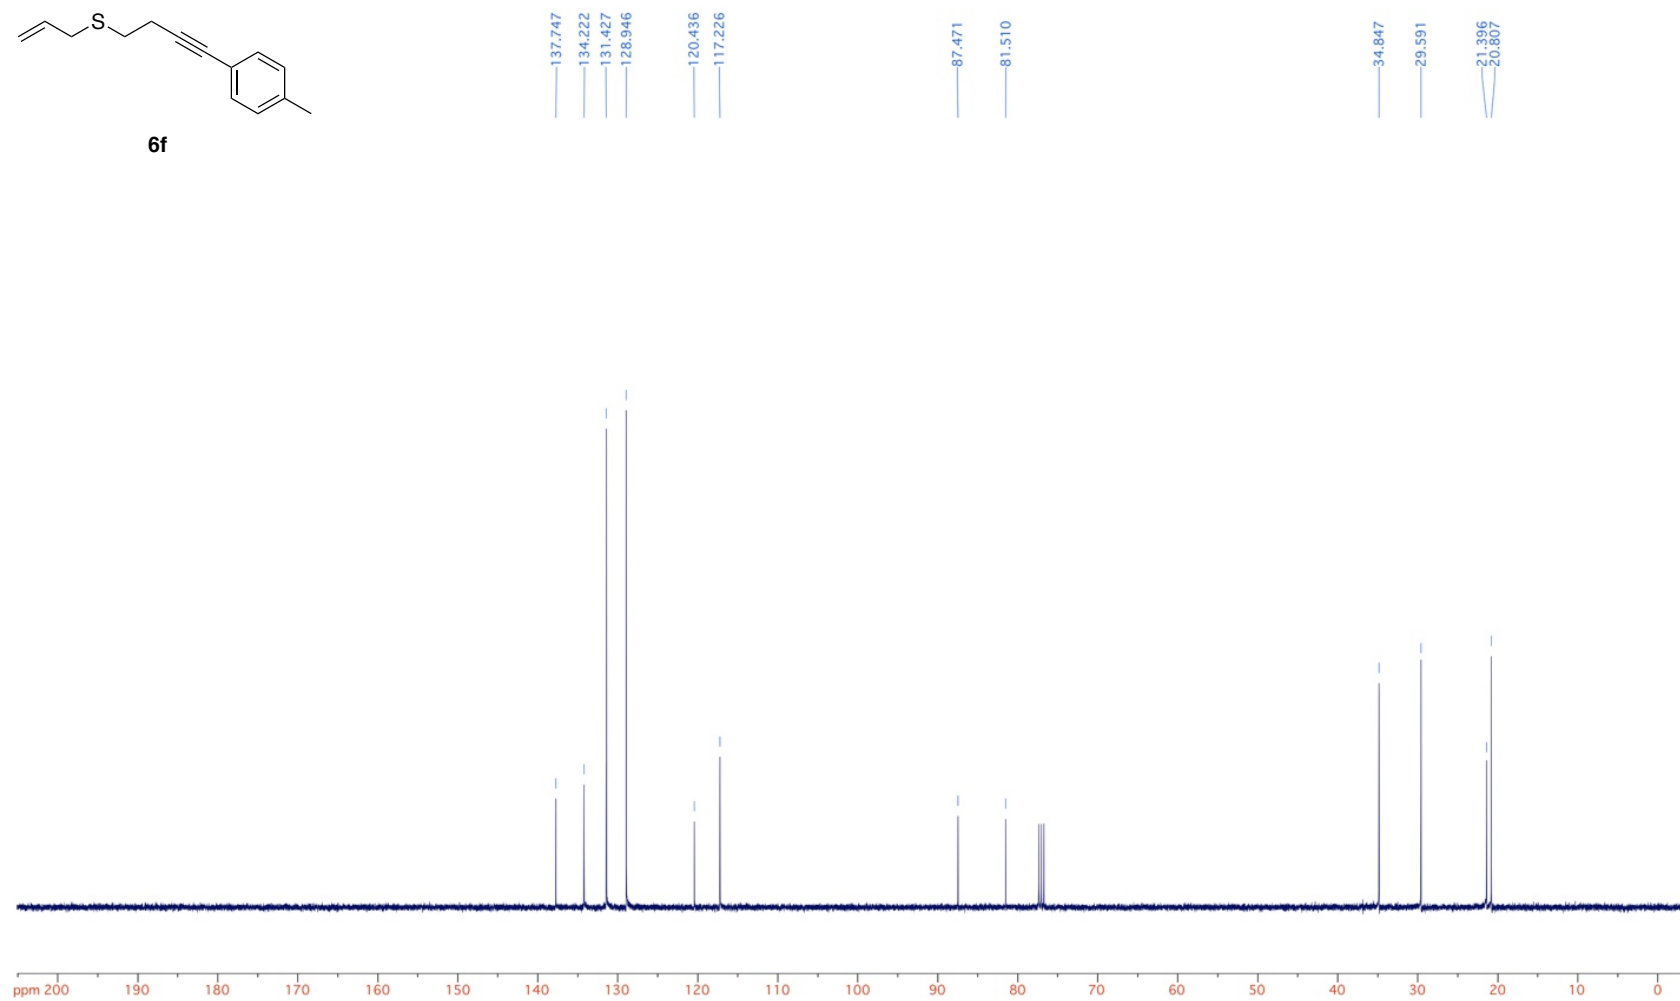

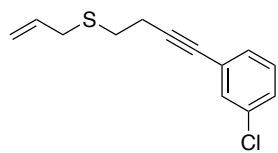

6g

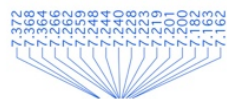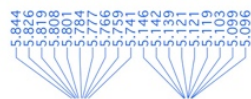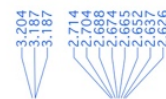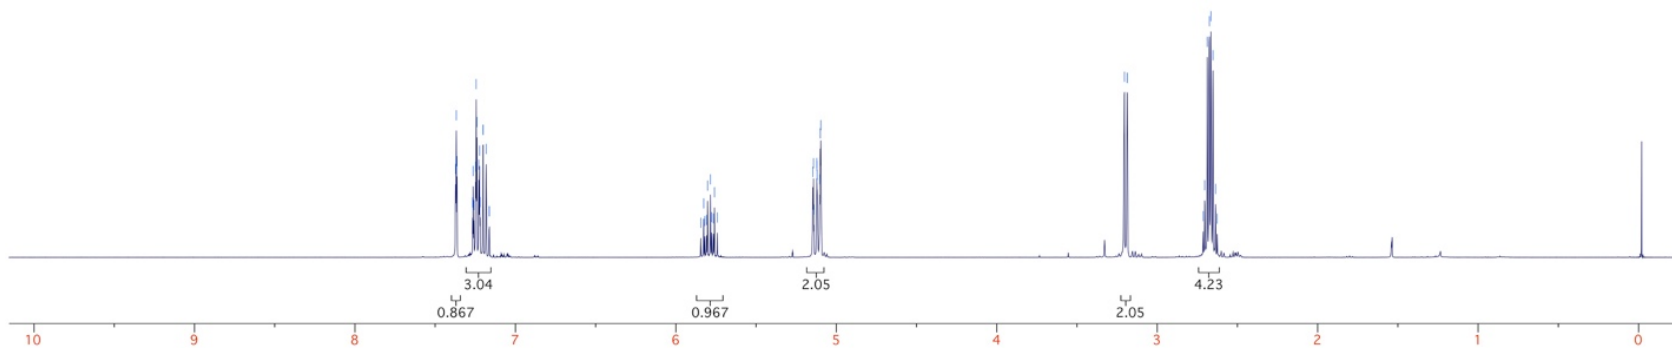



6g

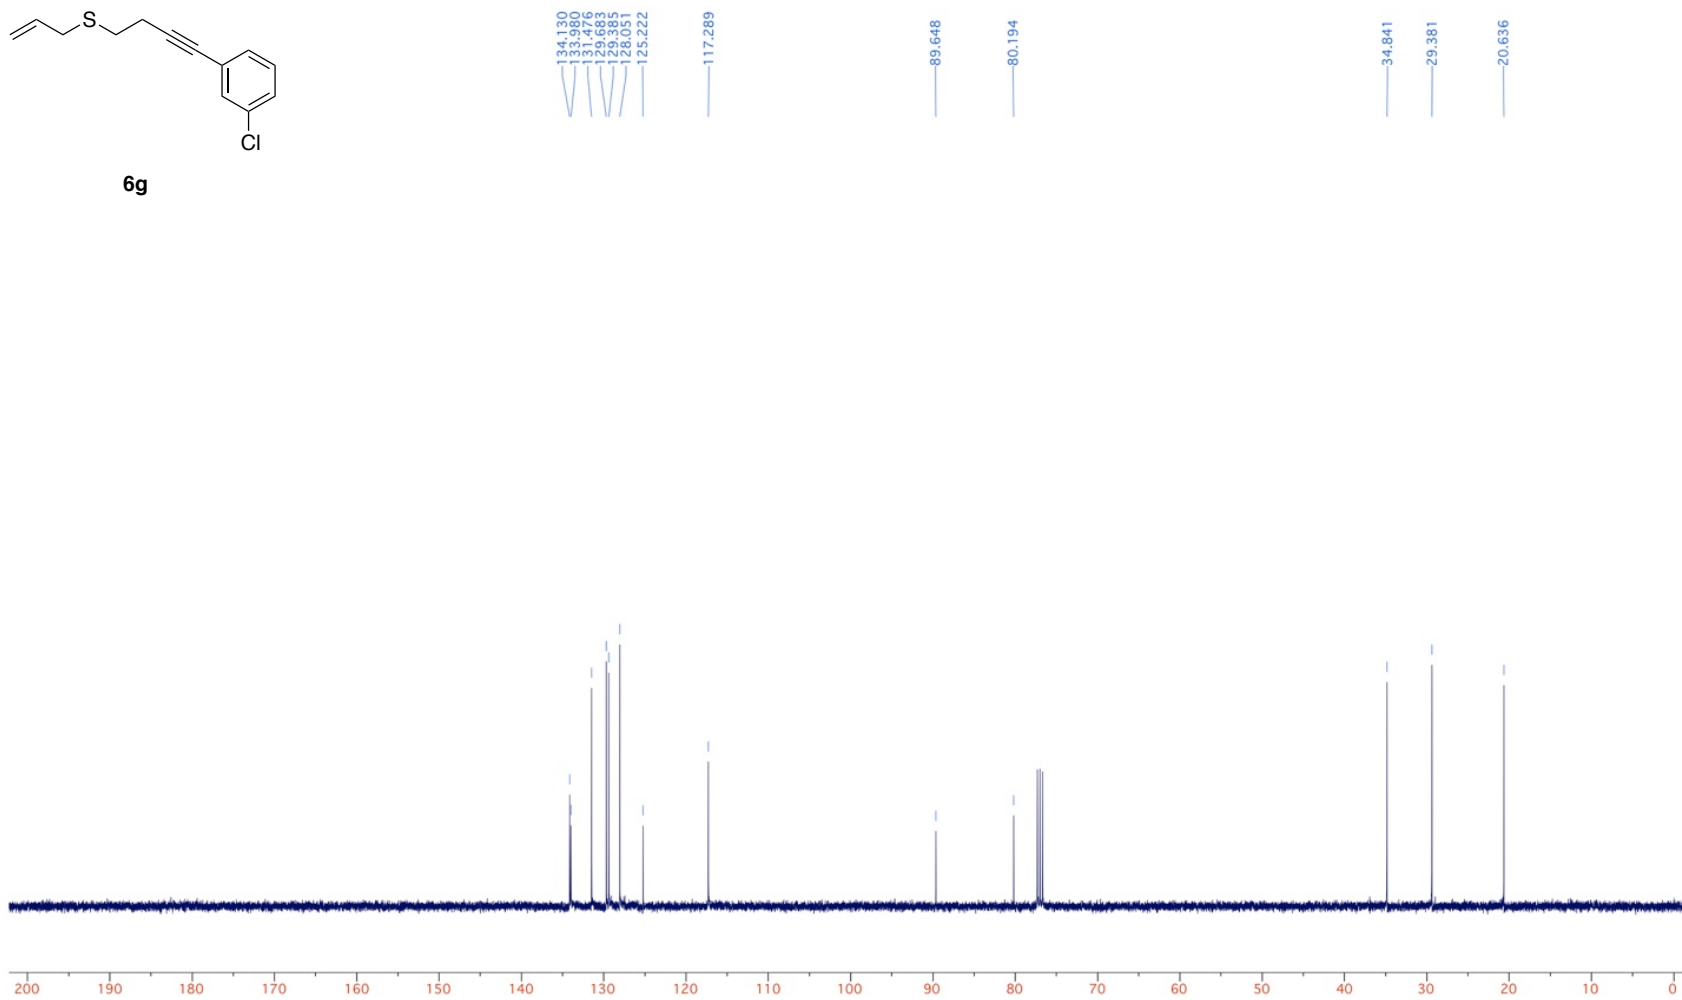

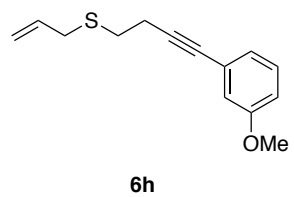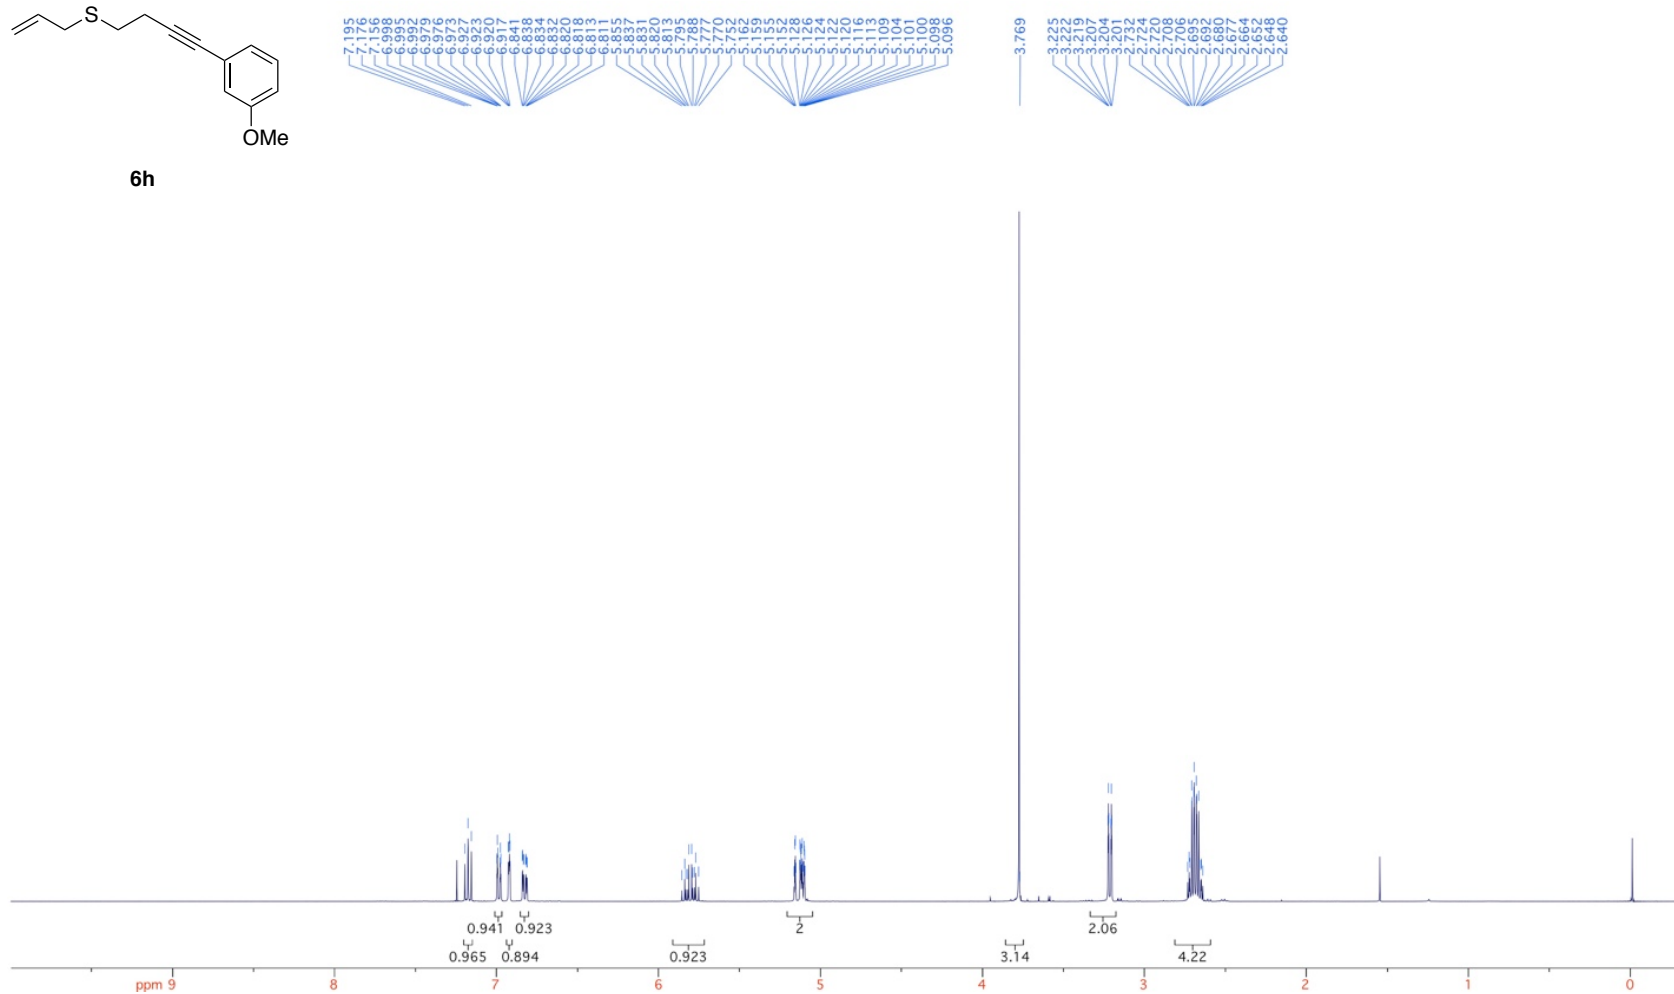

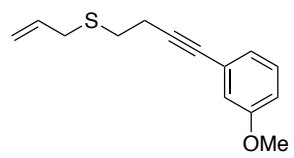

6h

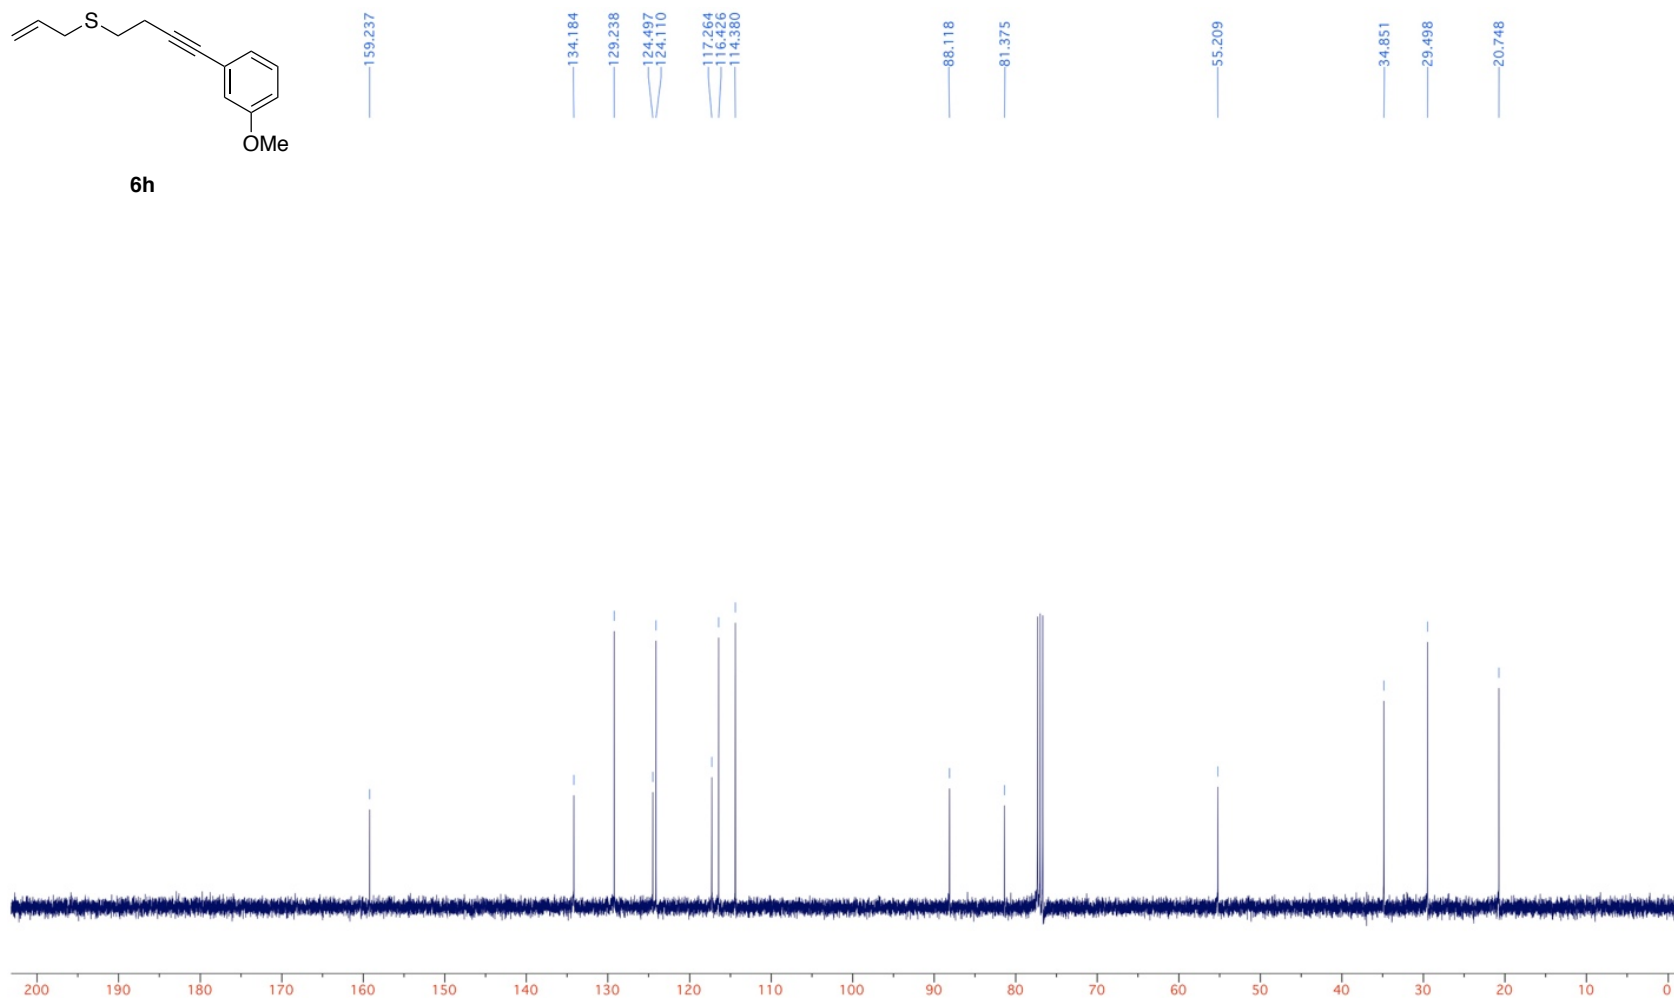





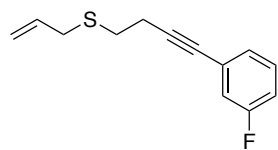

6i

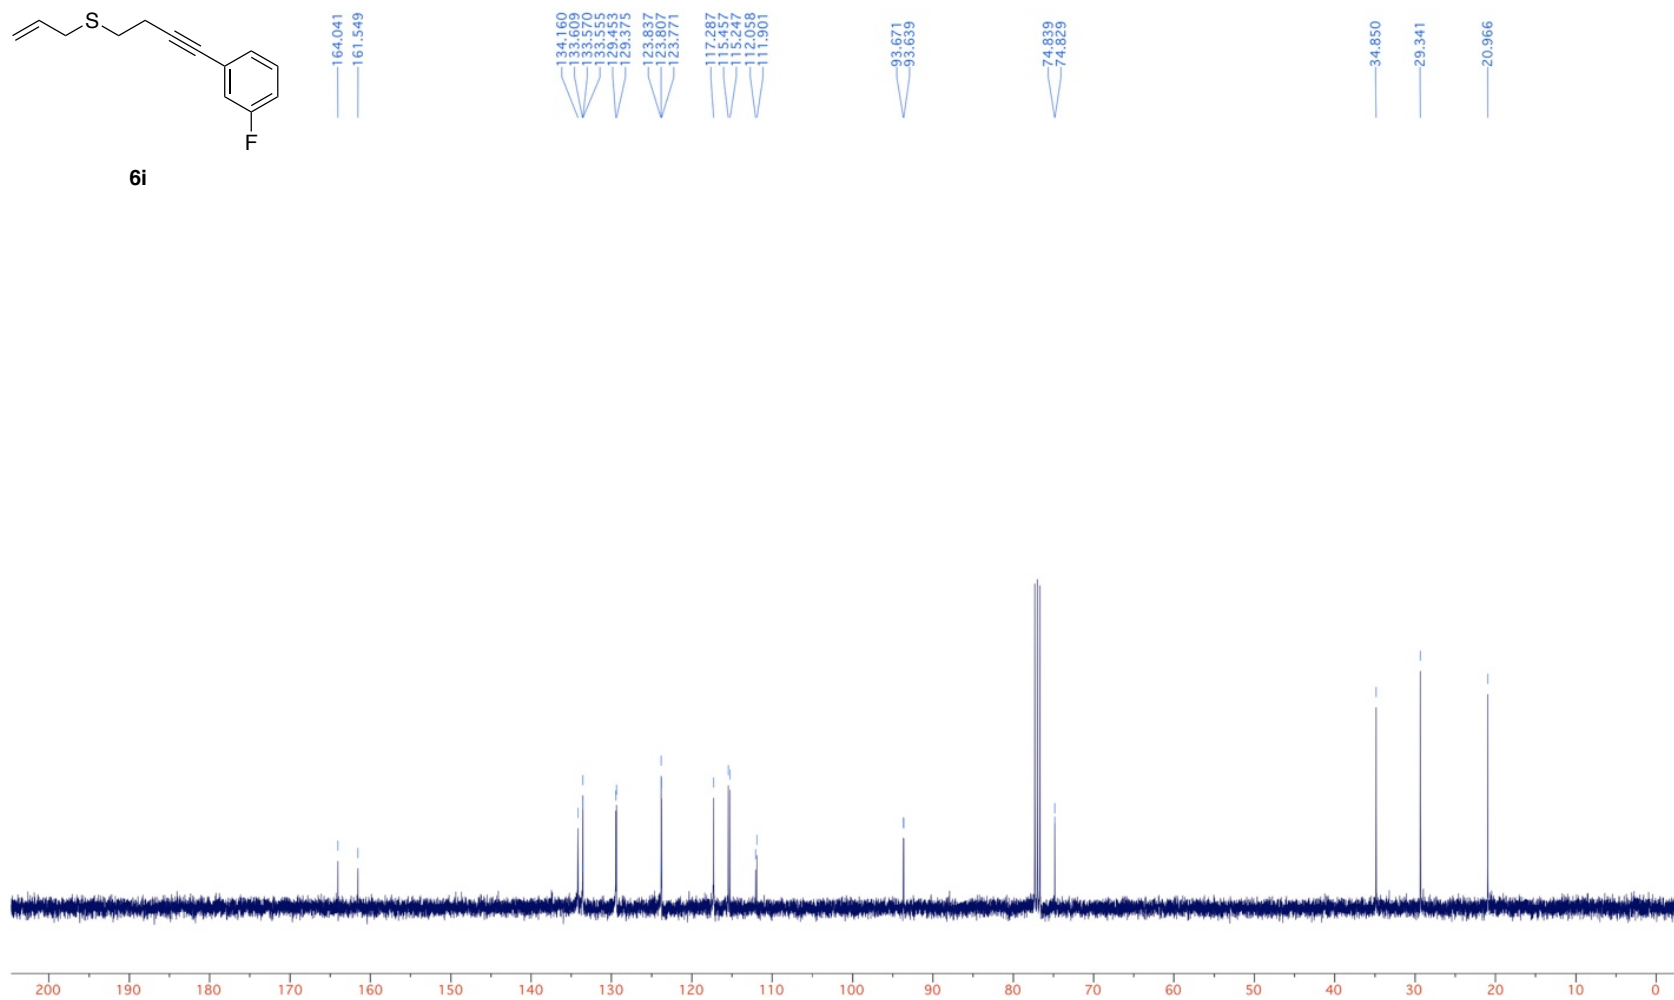

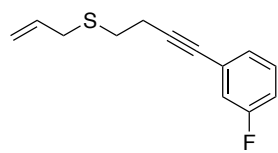

**6i**

101.000  
100.625  
100.250  
99.875  
99.500

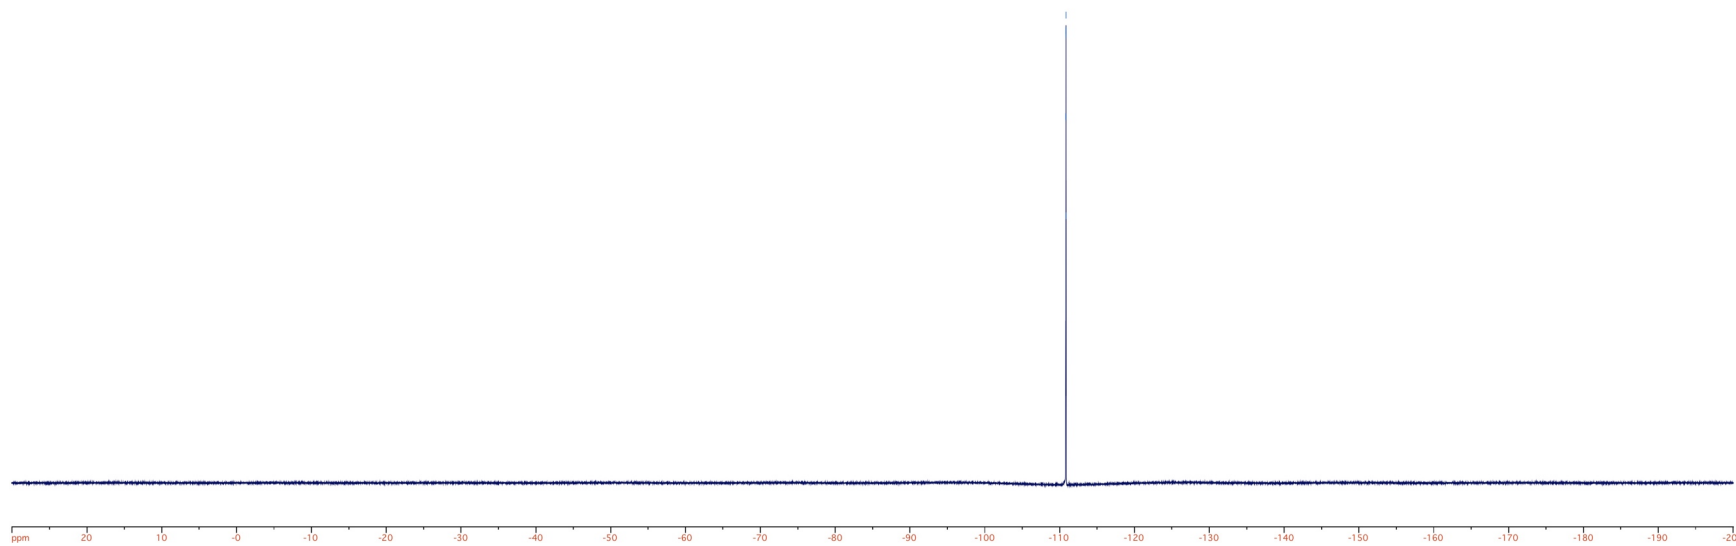

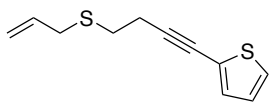

6j

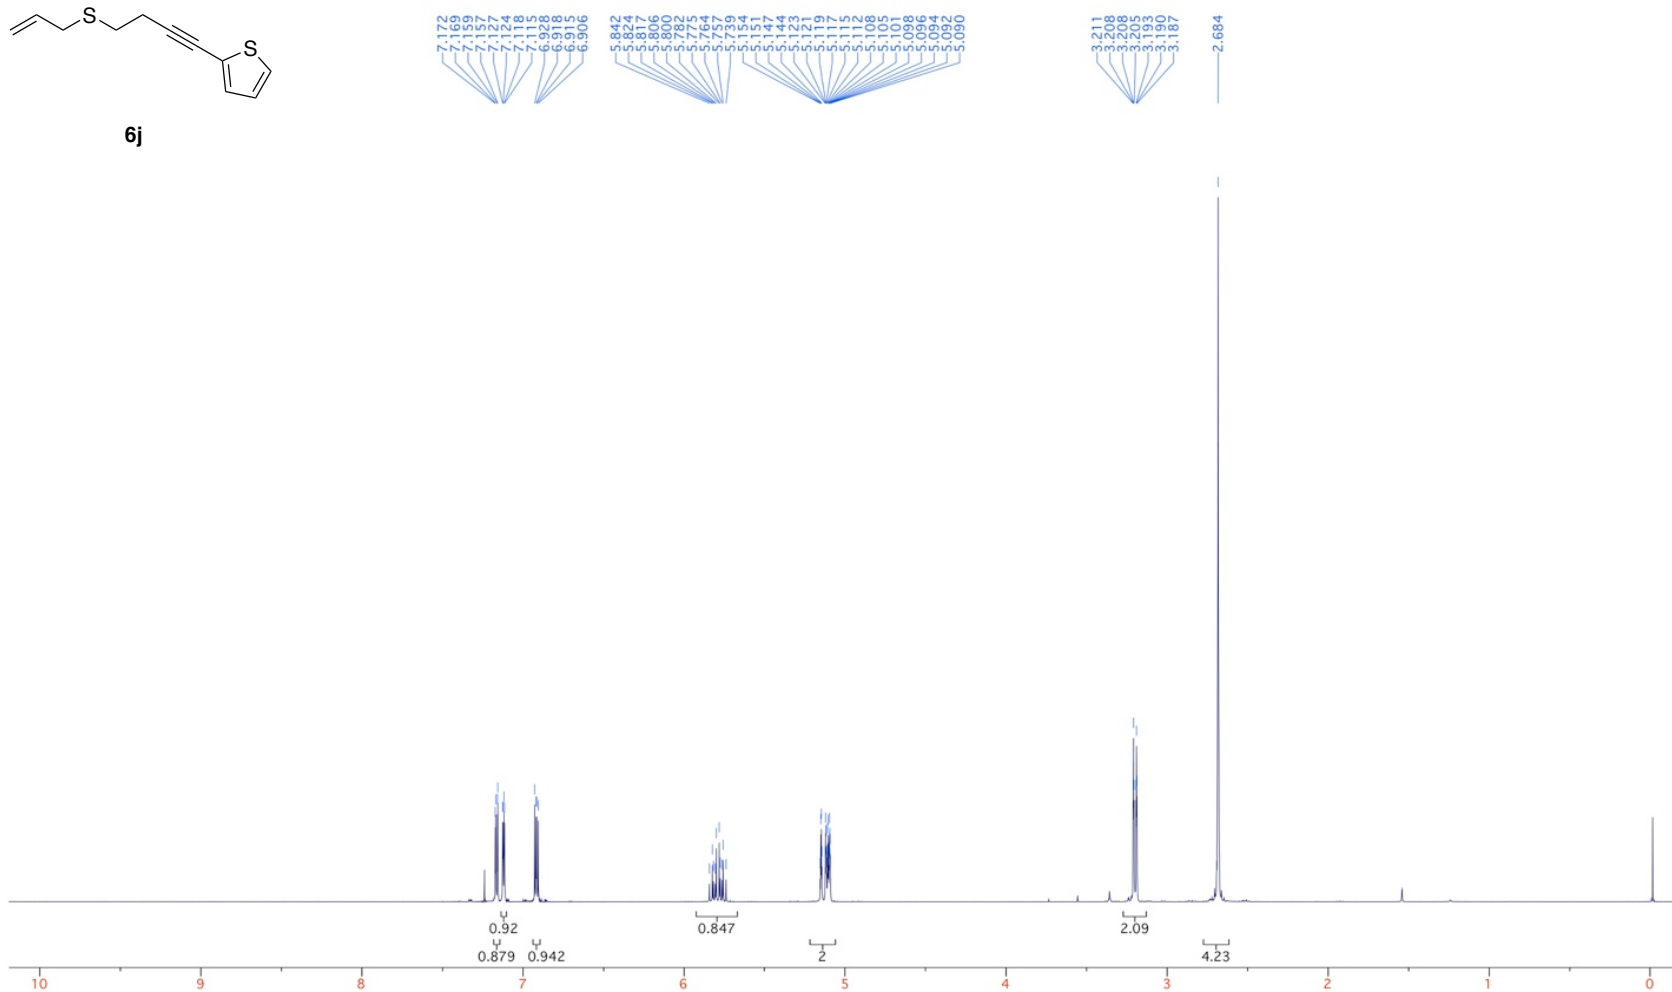

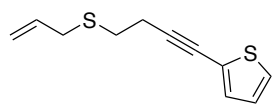

6j

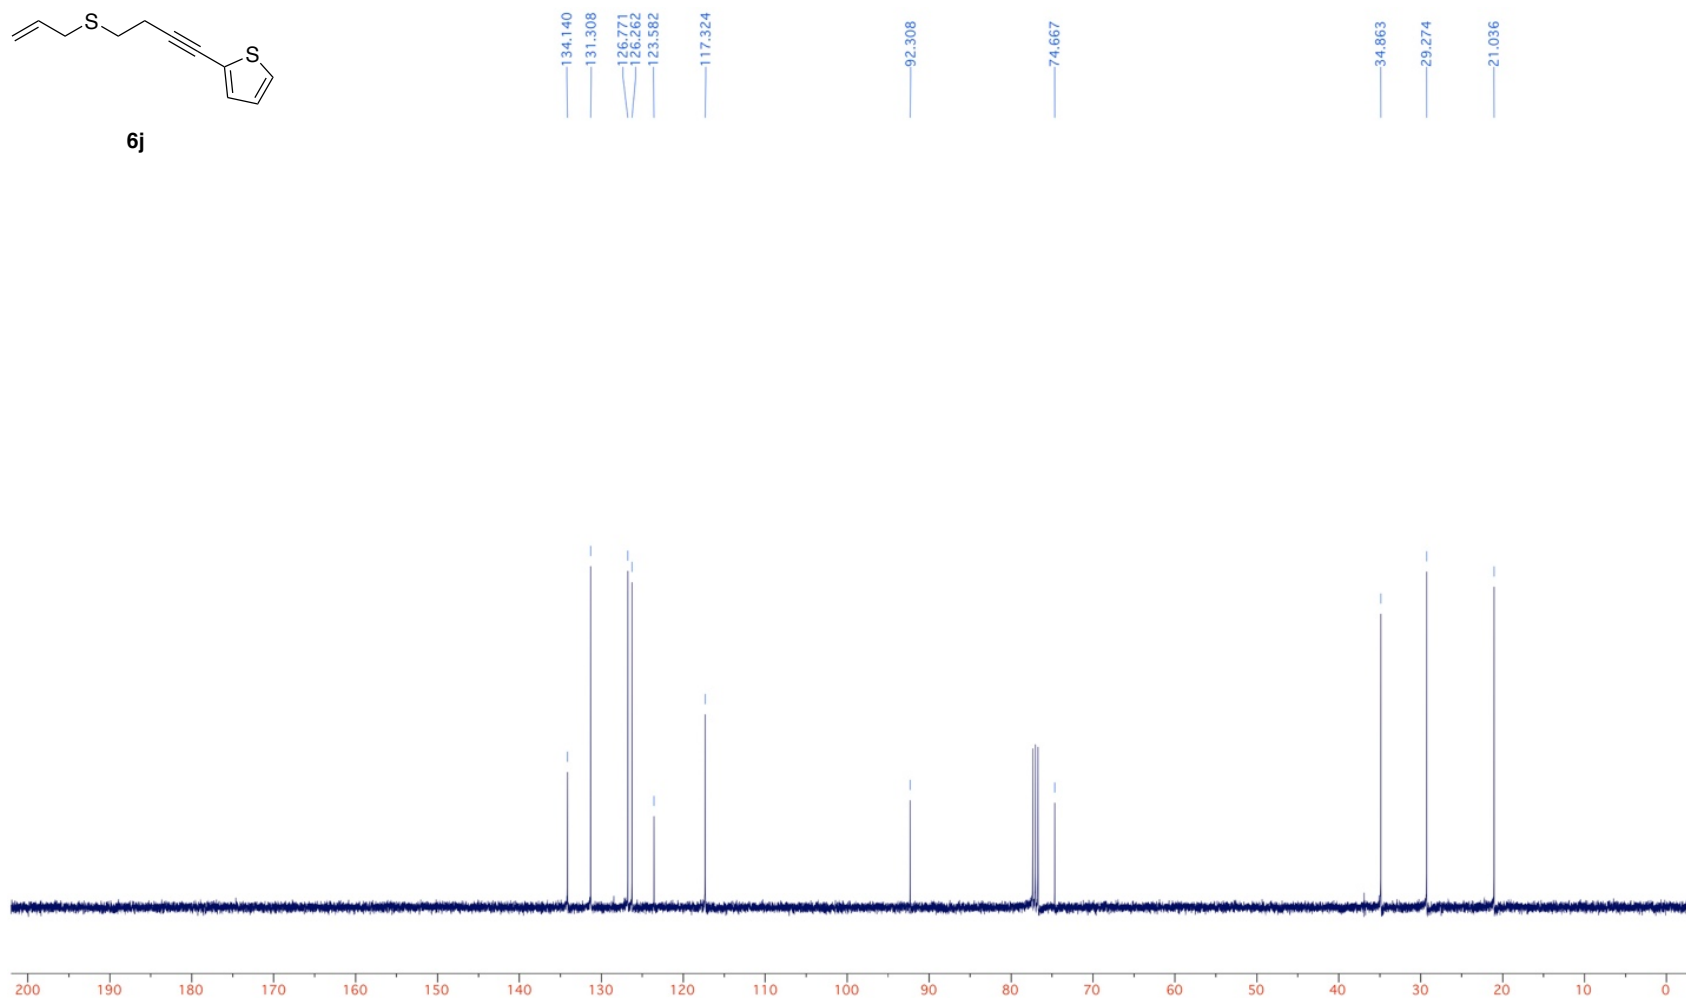



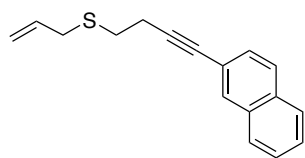

6k

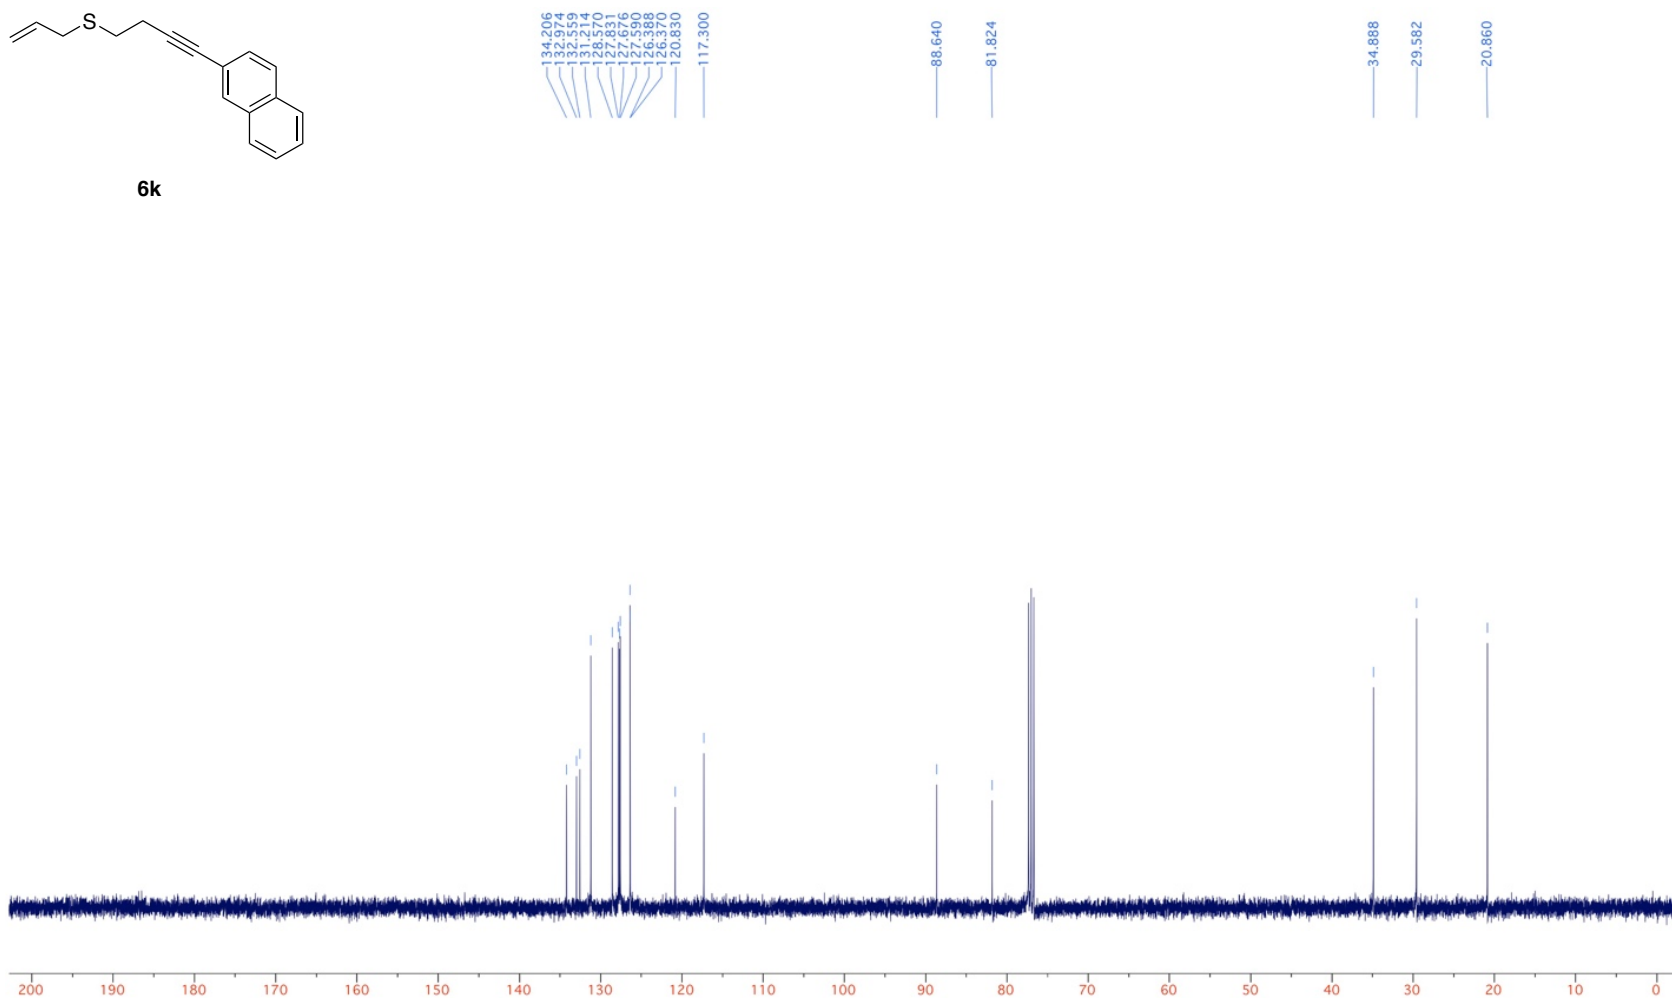

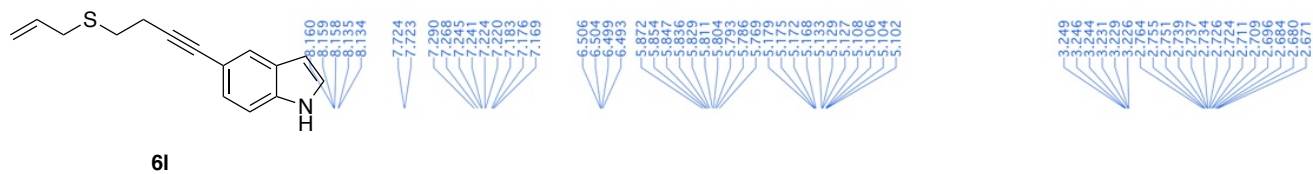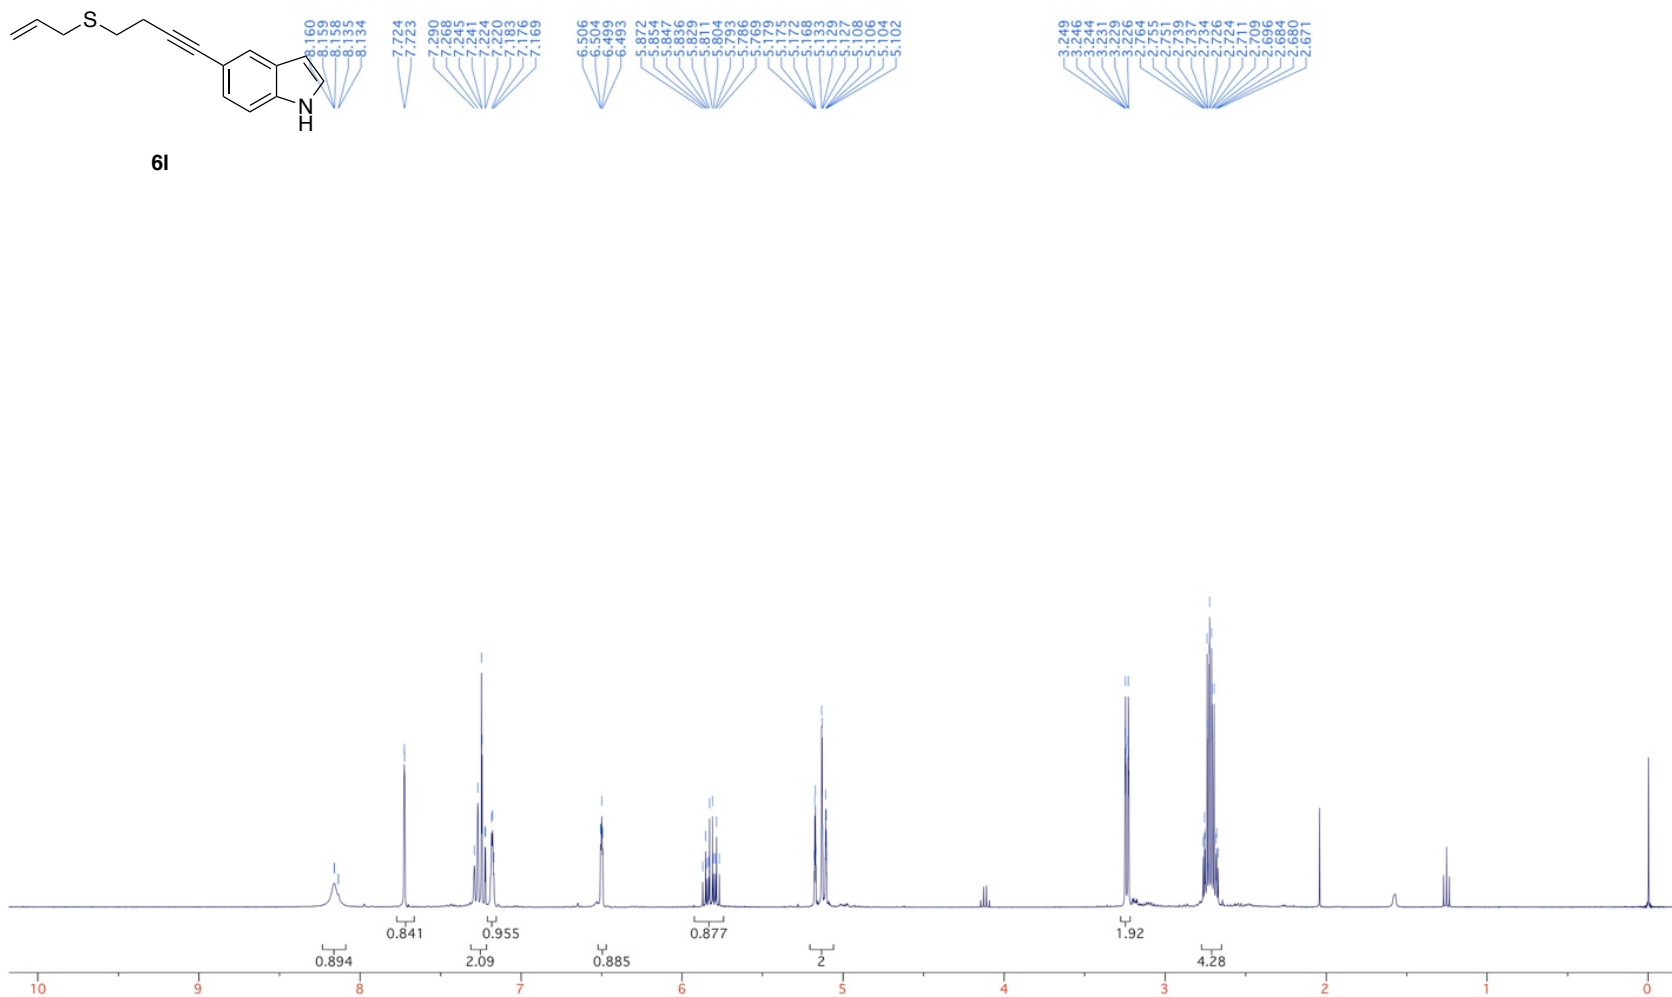



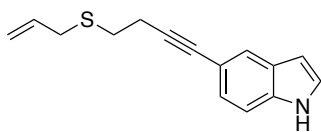

6l

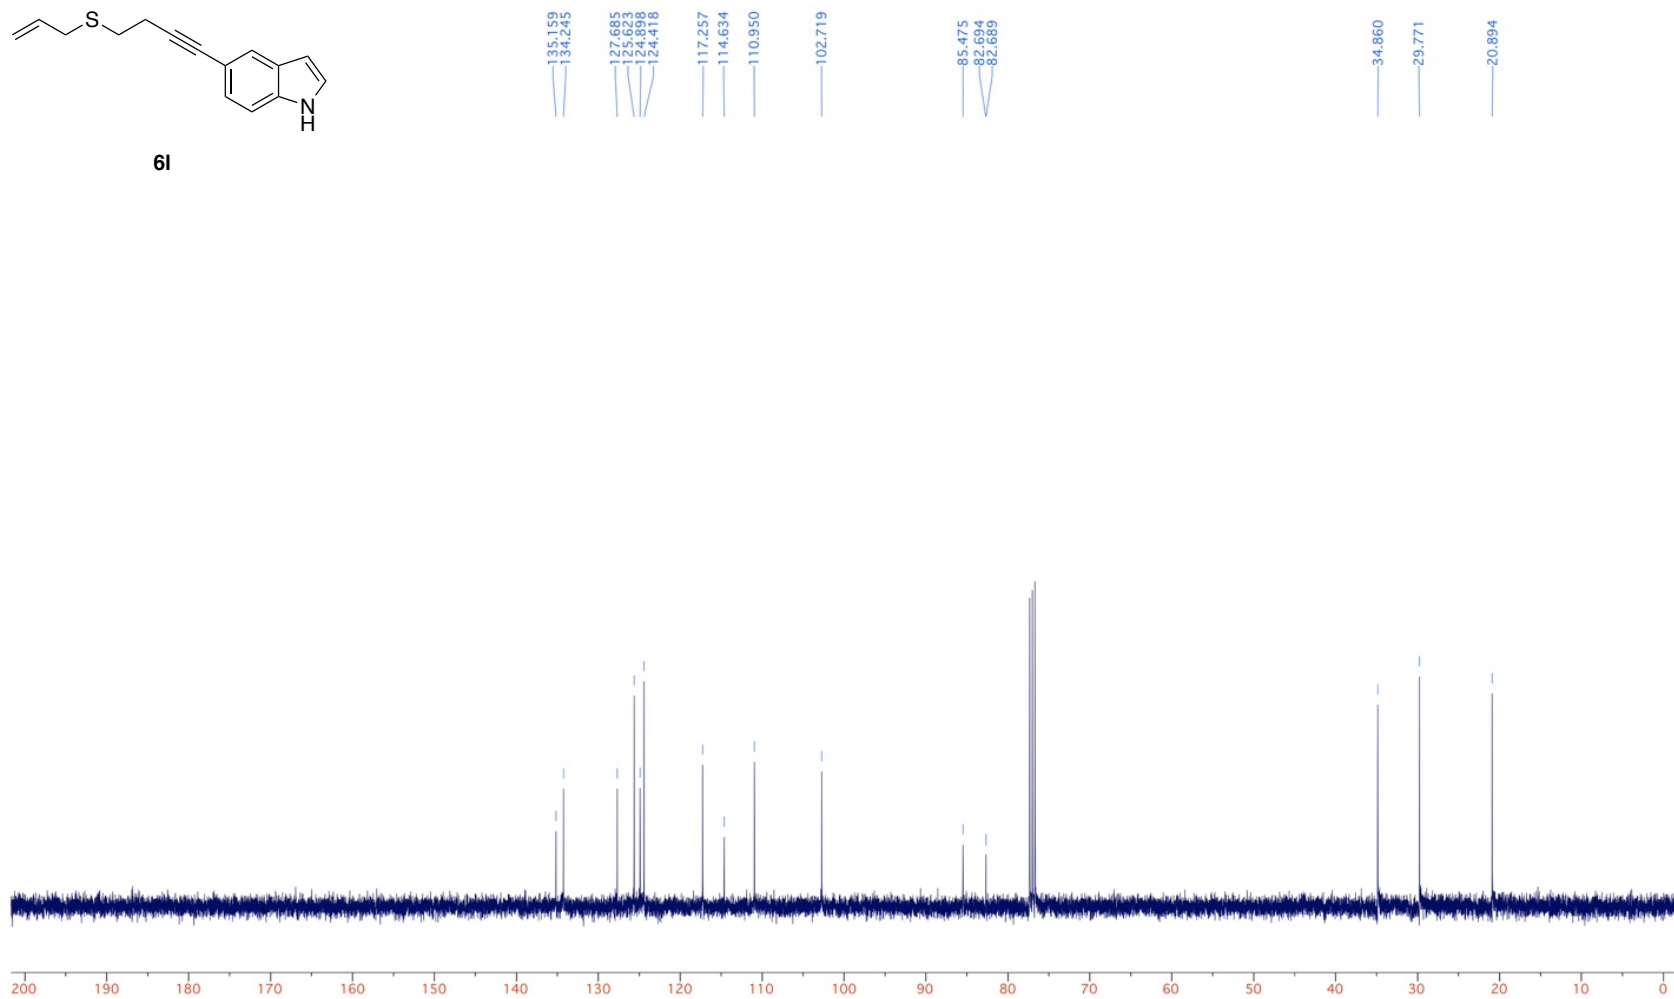

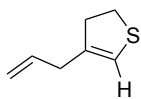

7a

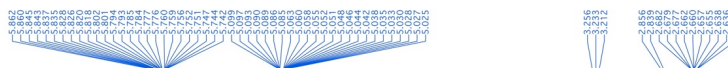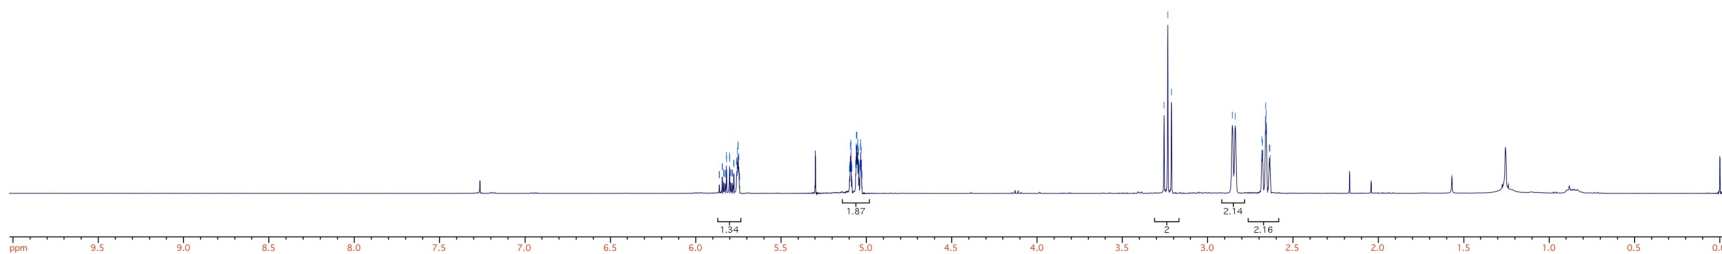

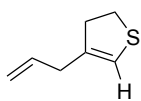

7a

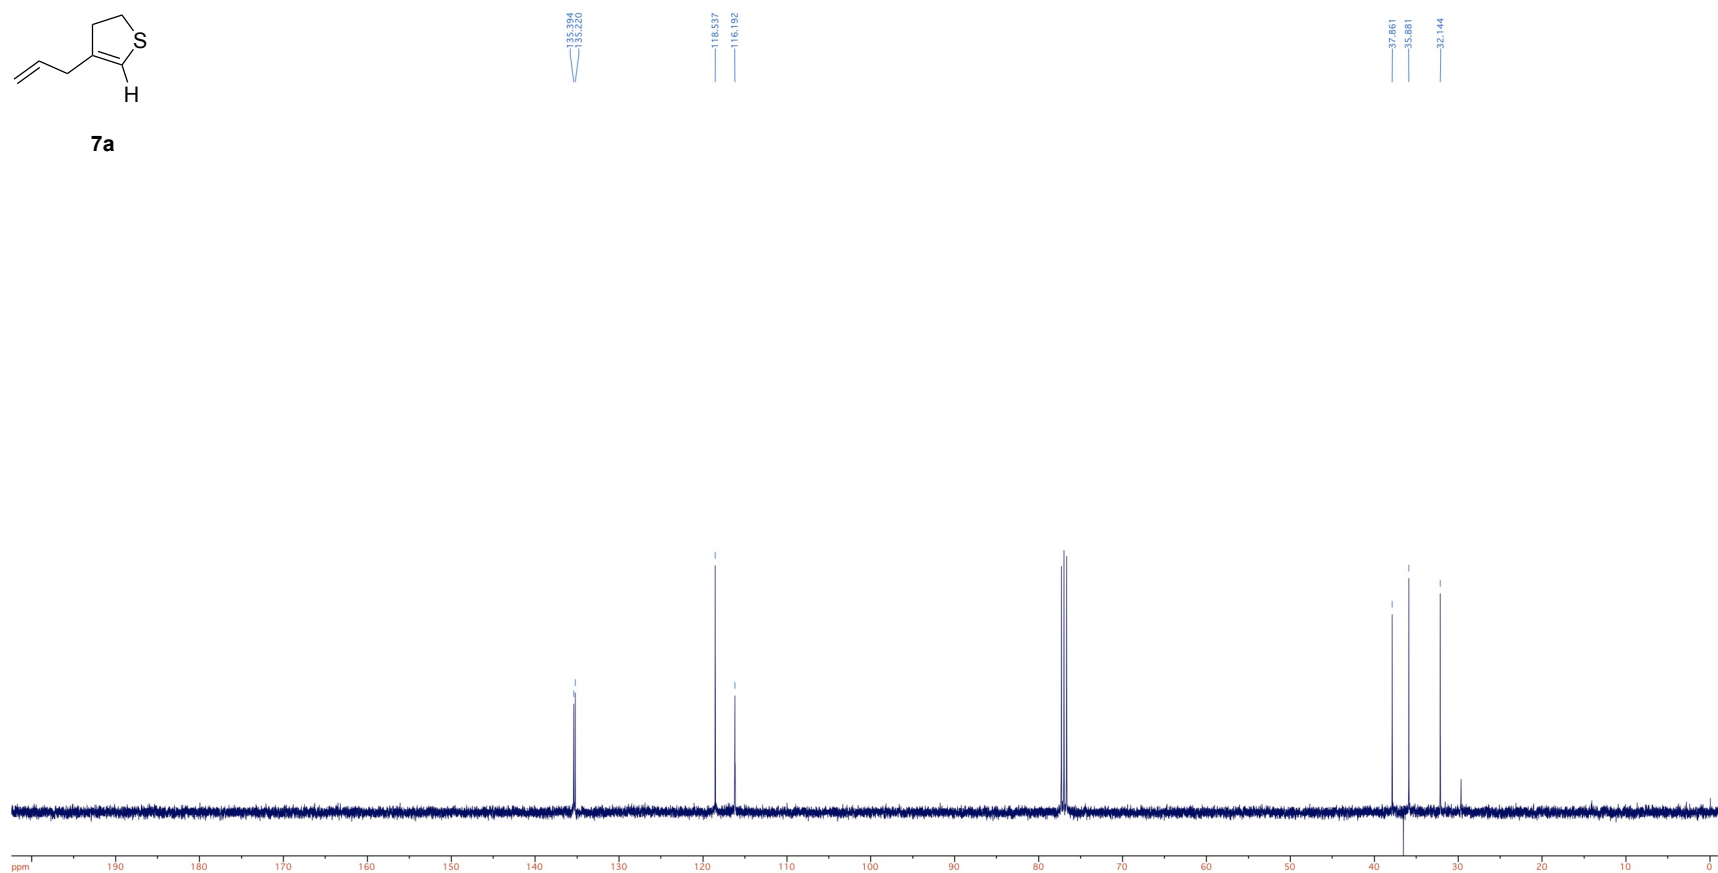

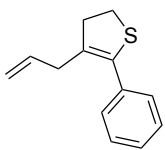

7b

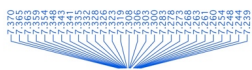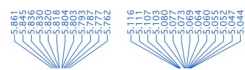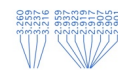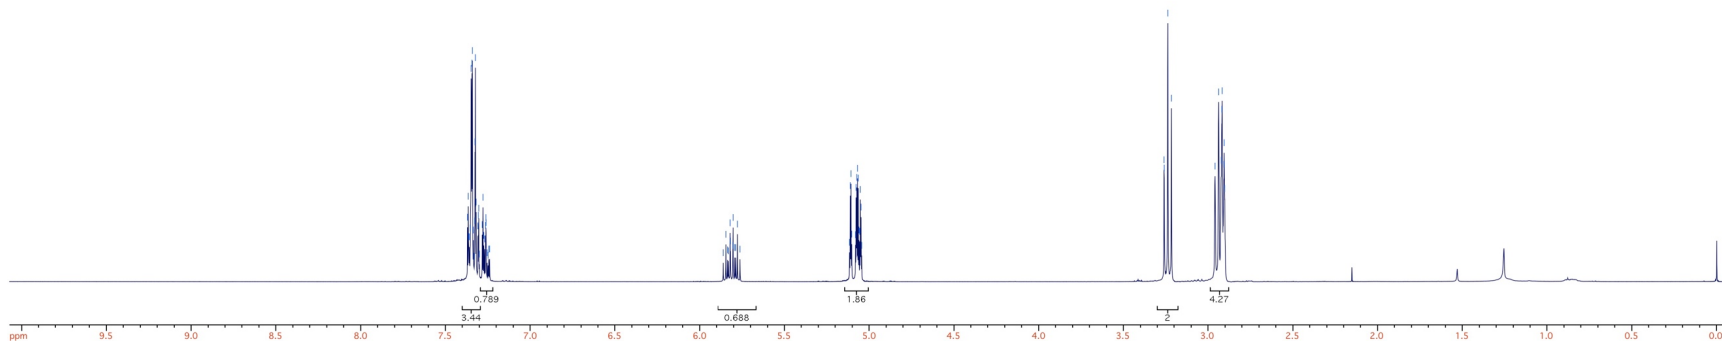

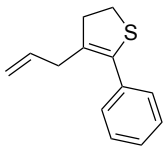

7b

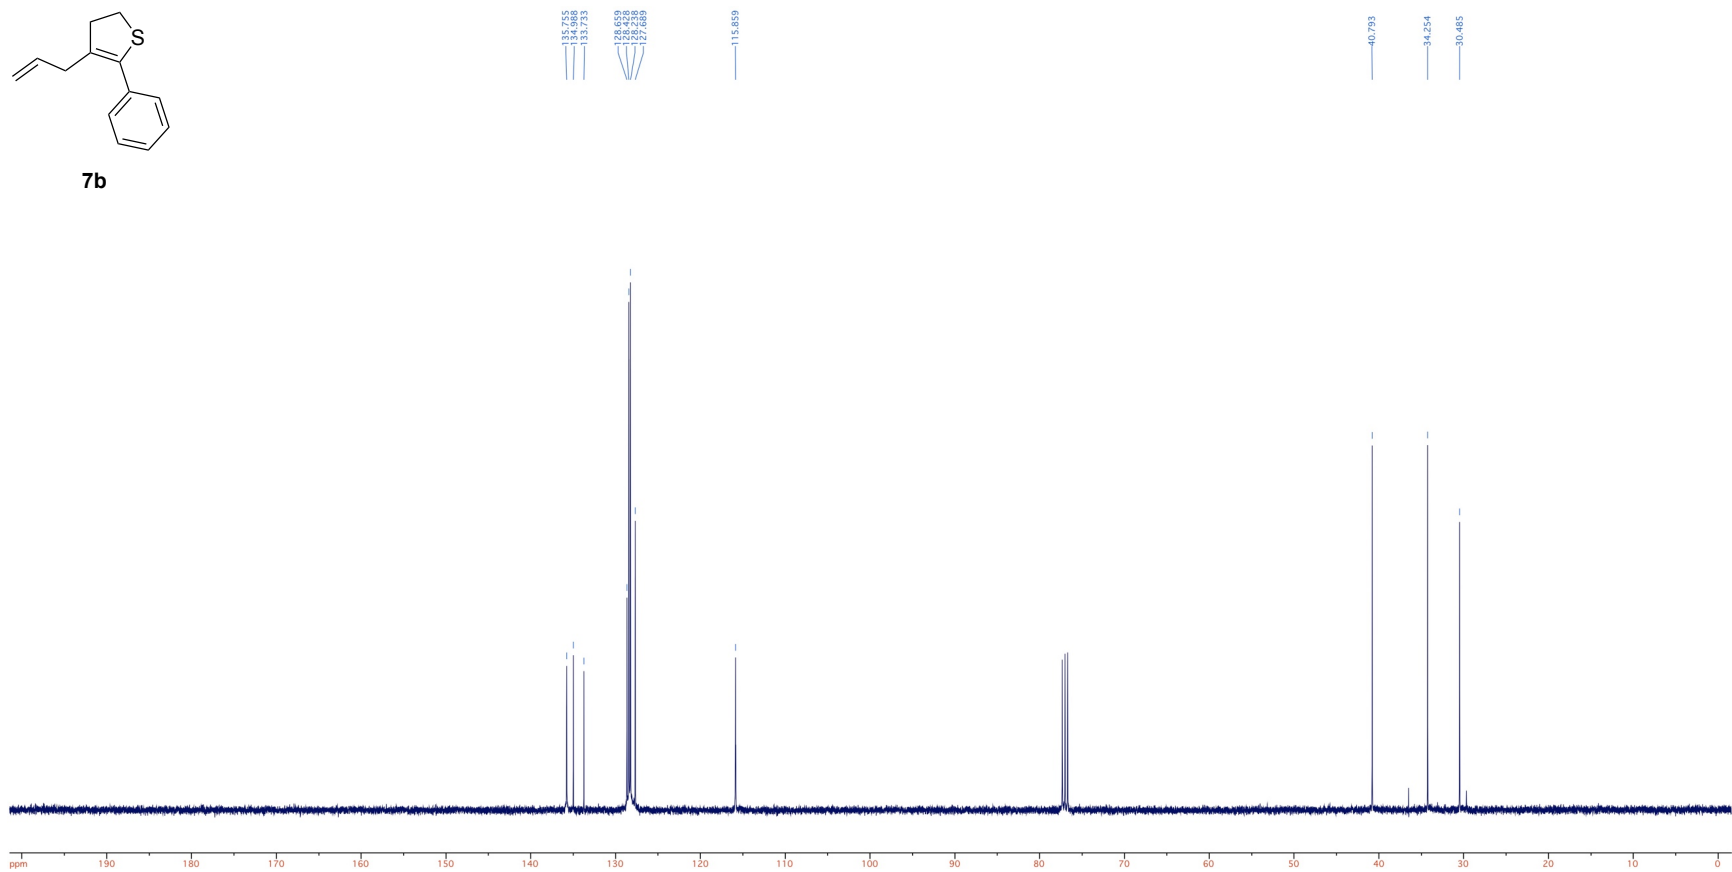

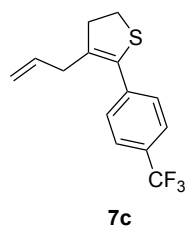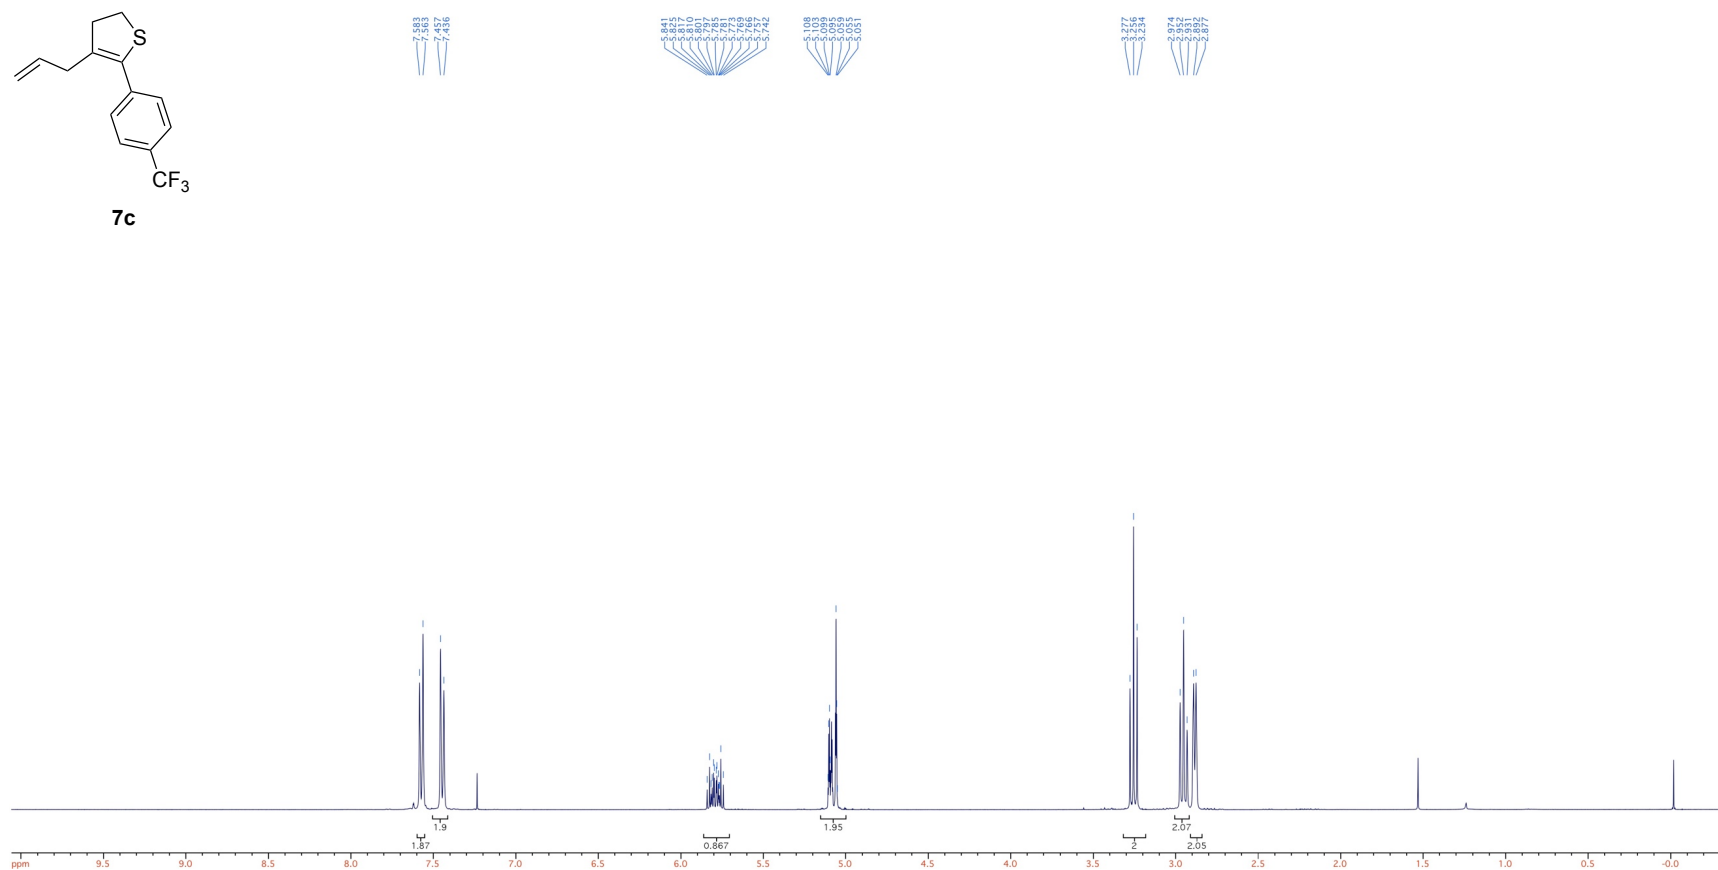

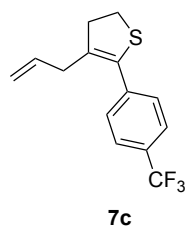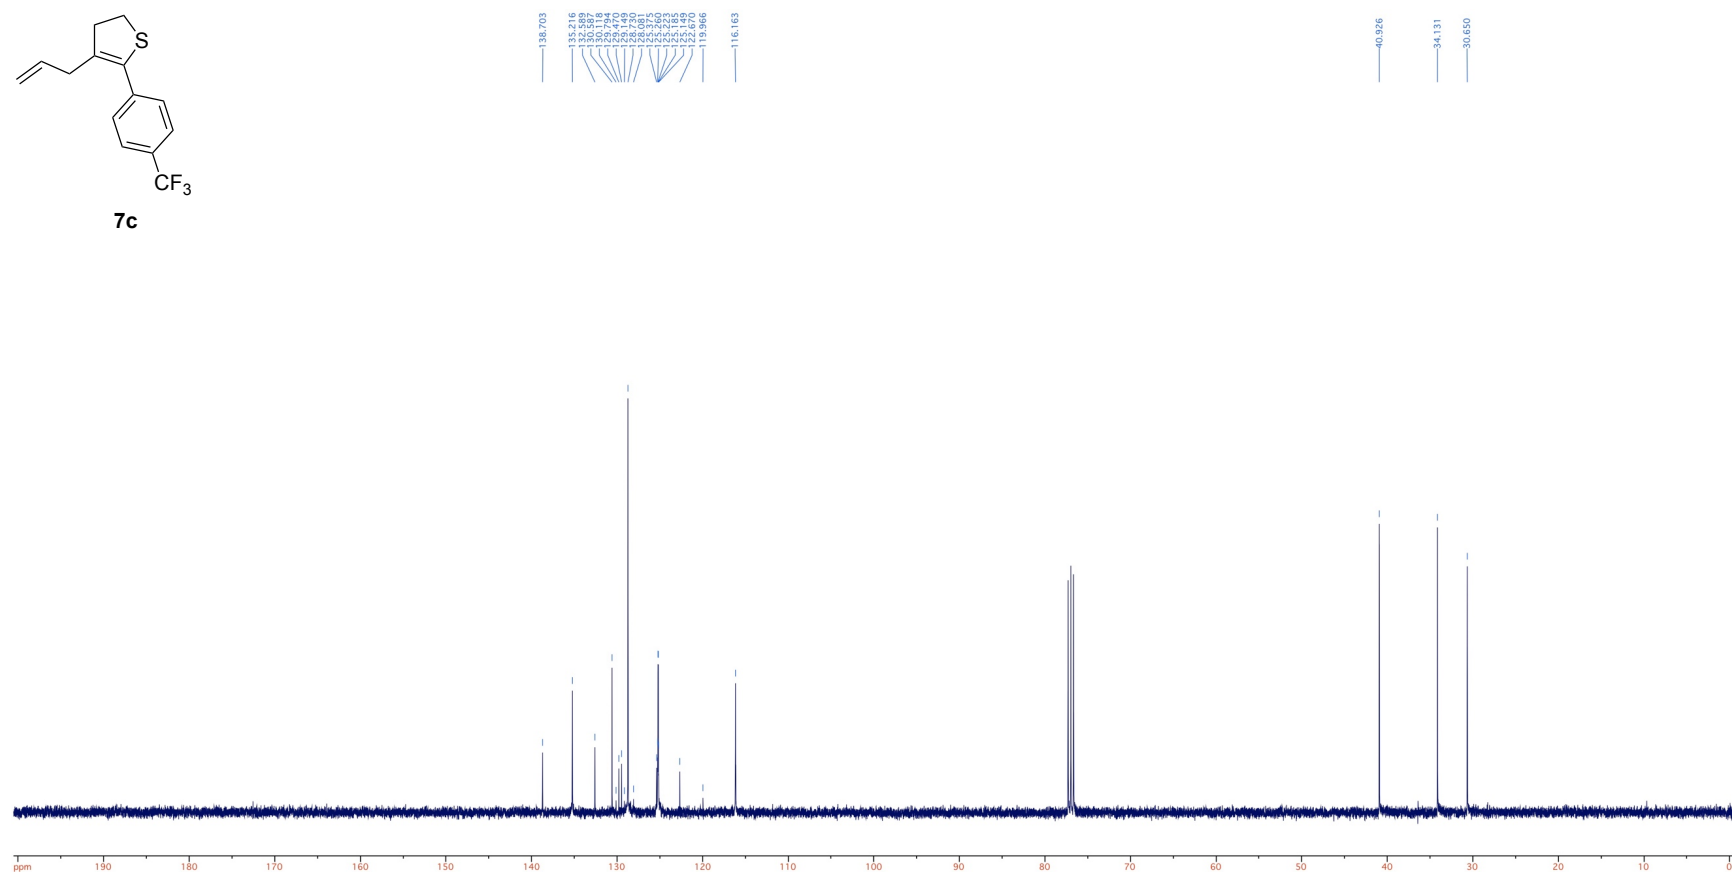

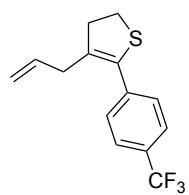

**7c**

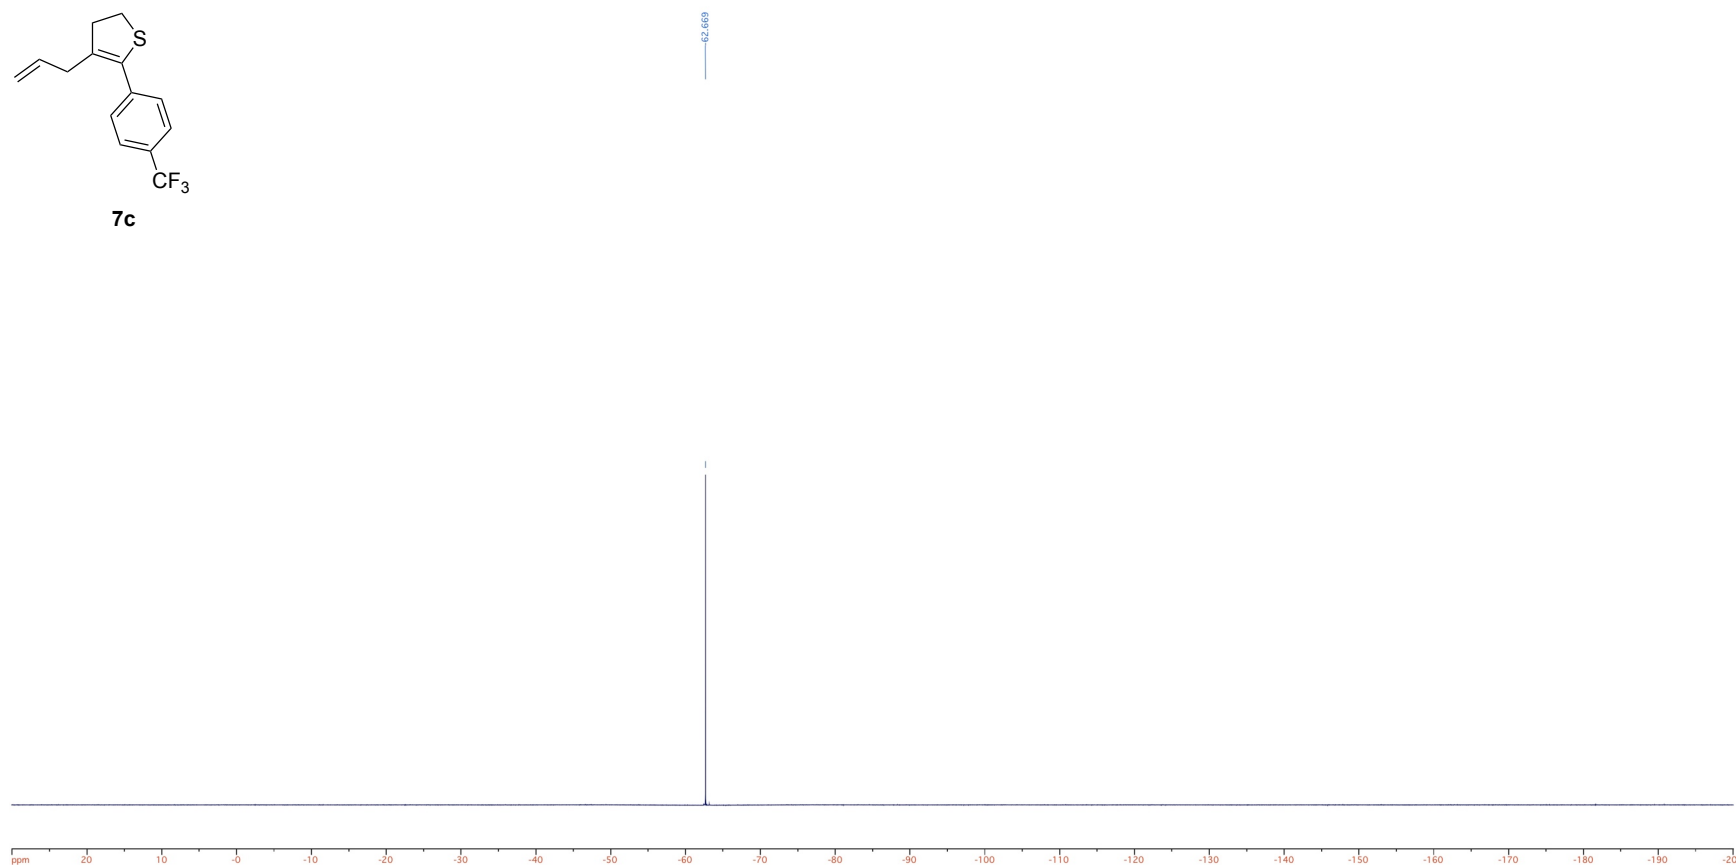



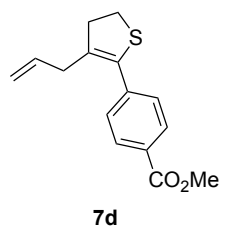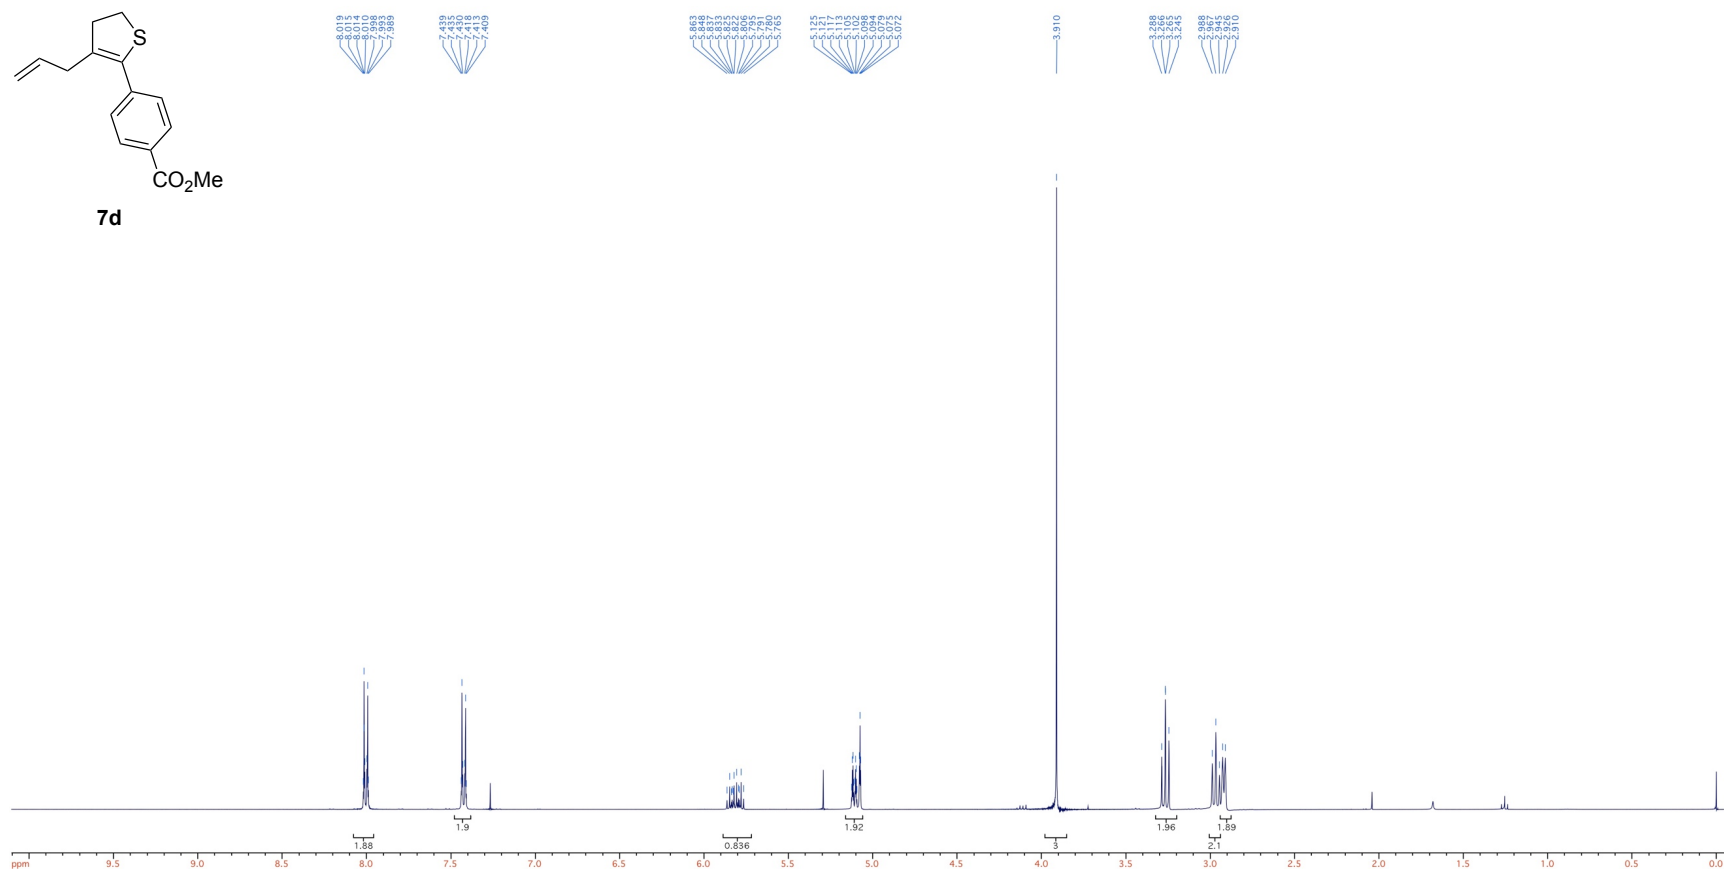

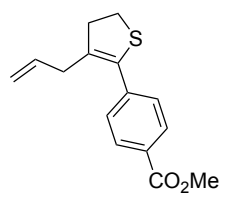

7d

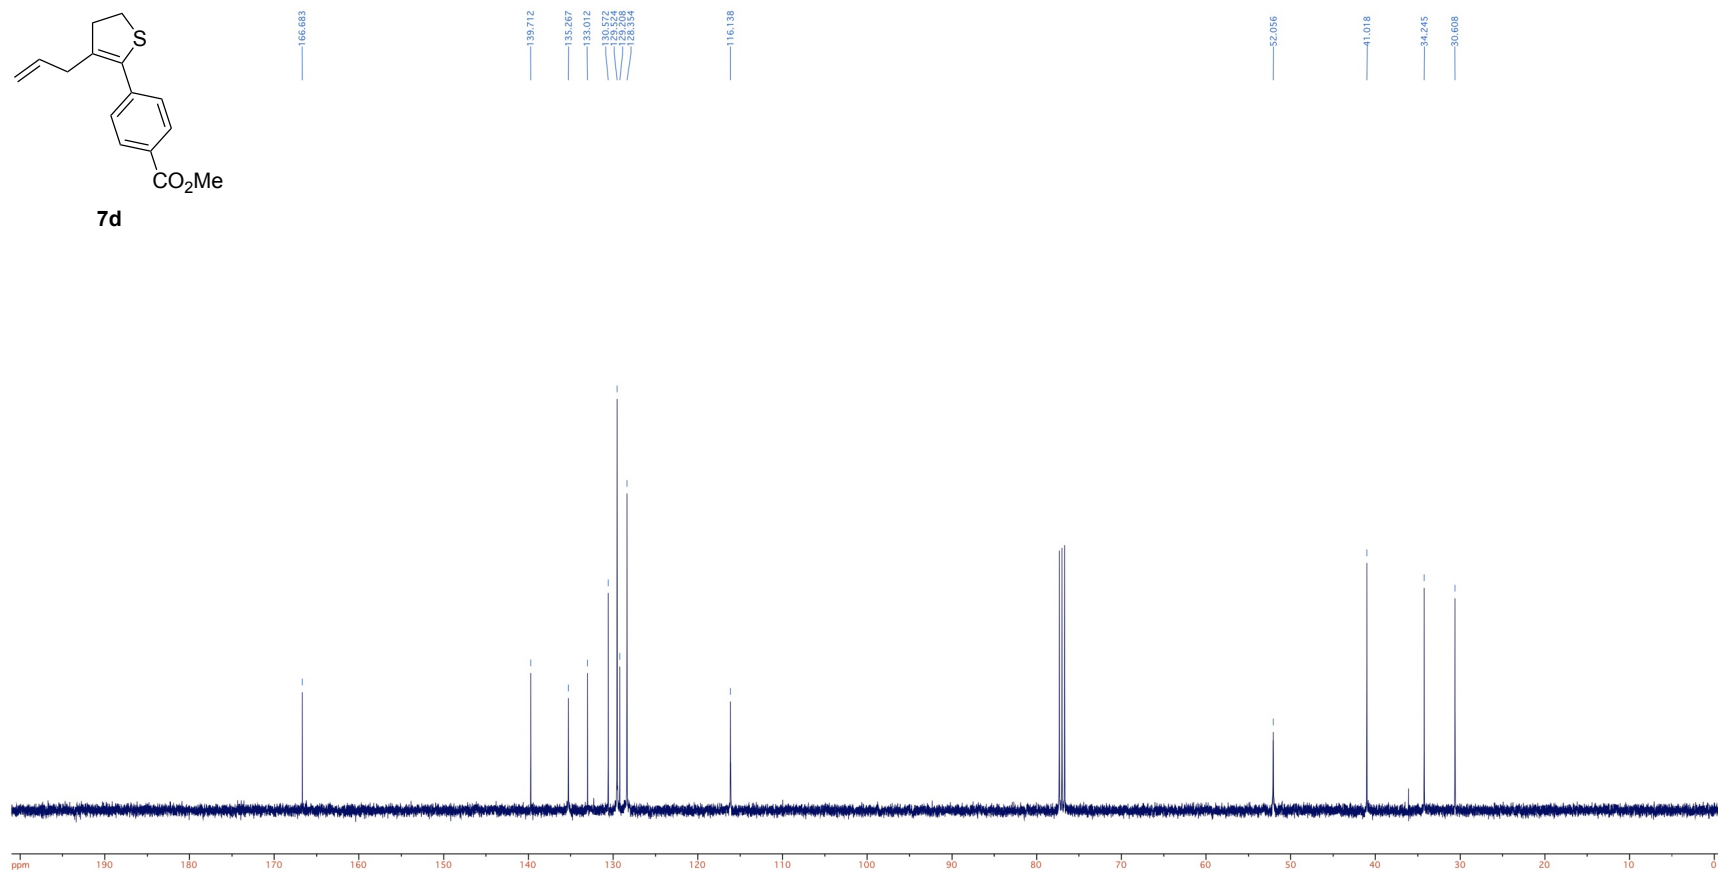



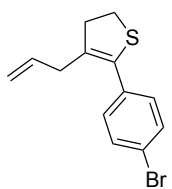

7e

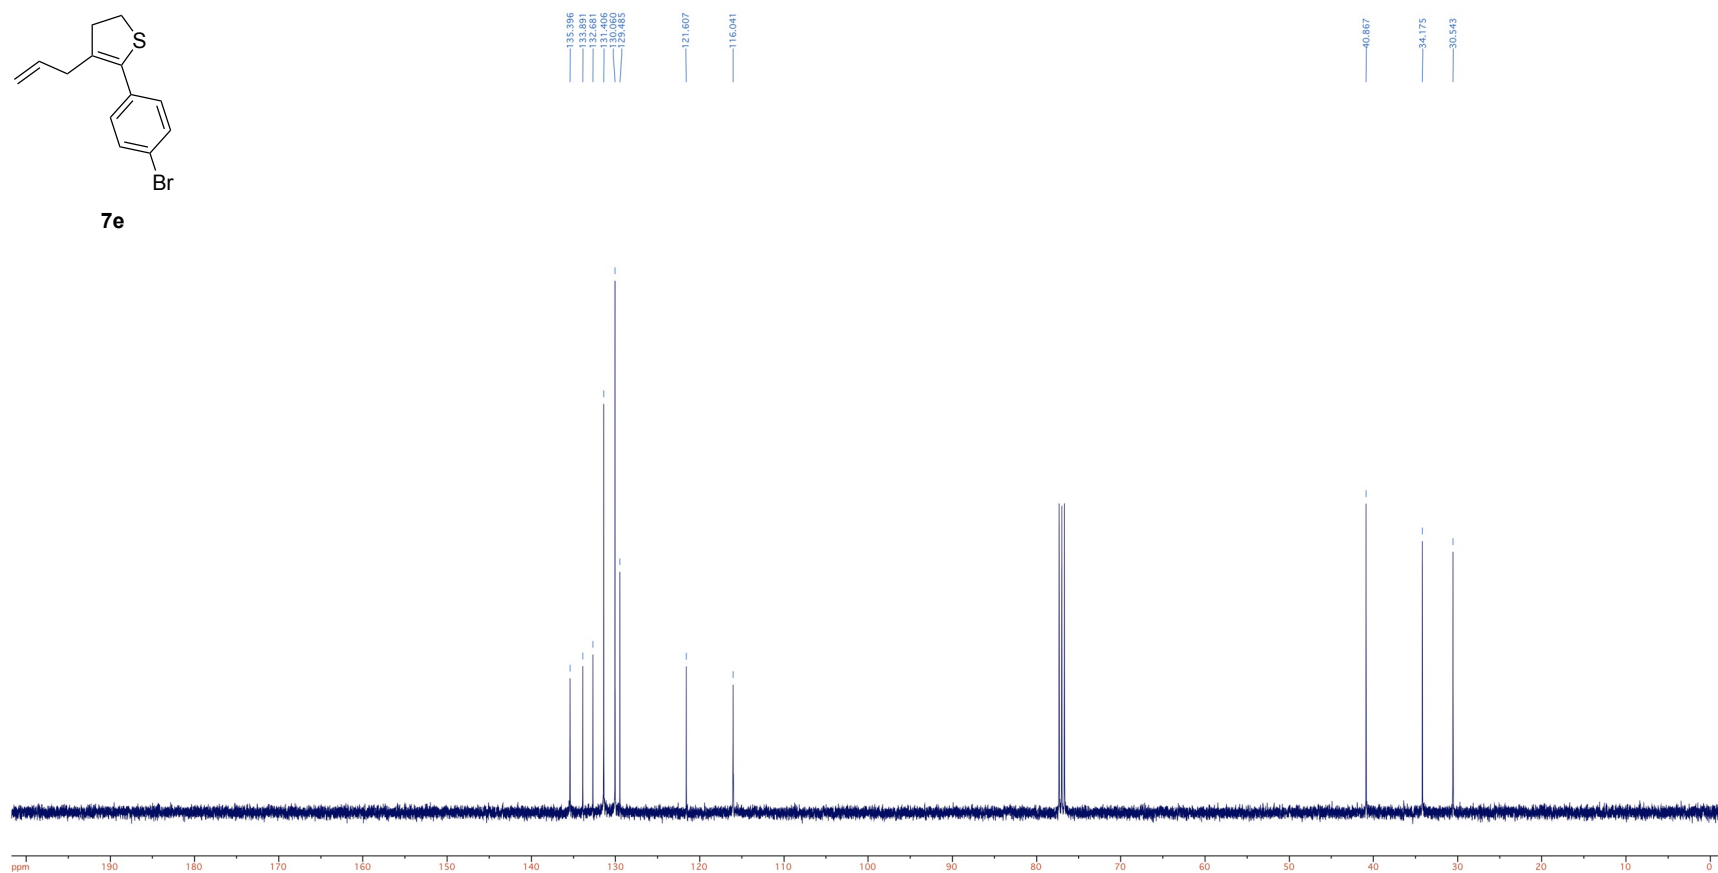

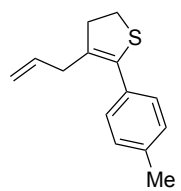

7f

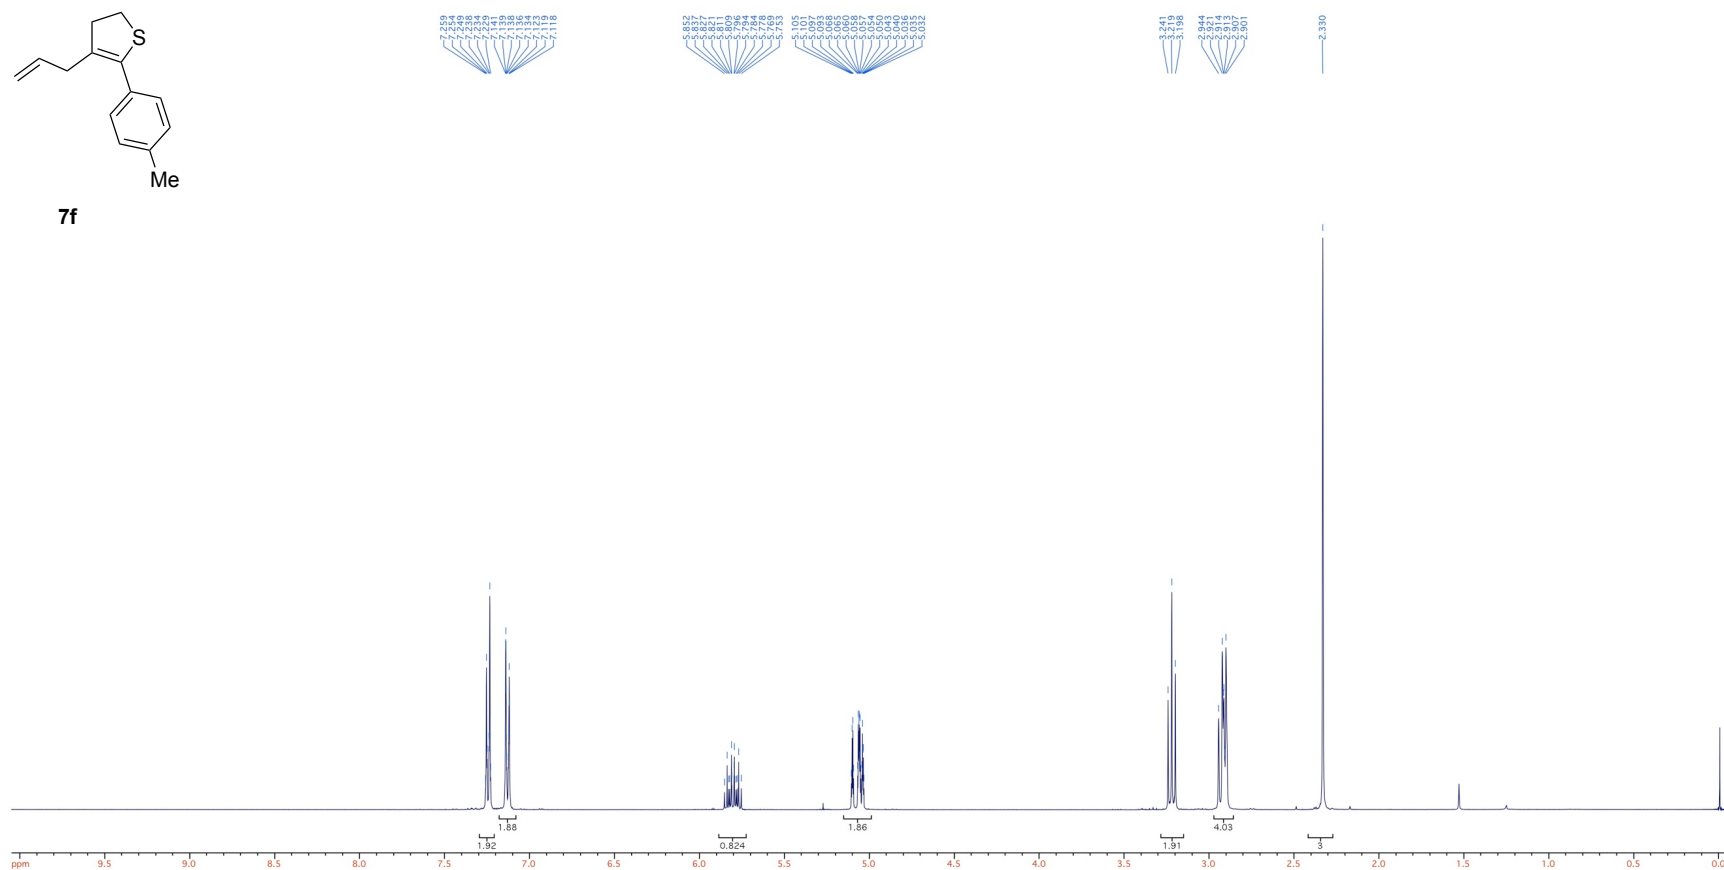

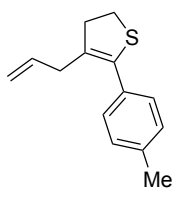

7f

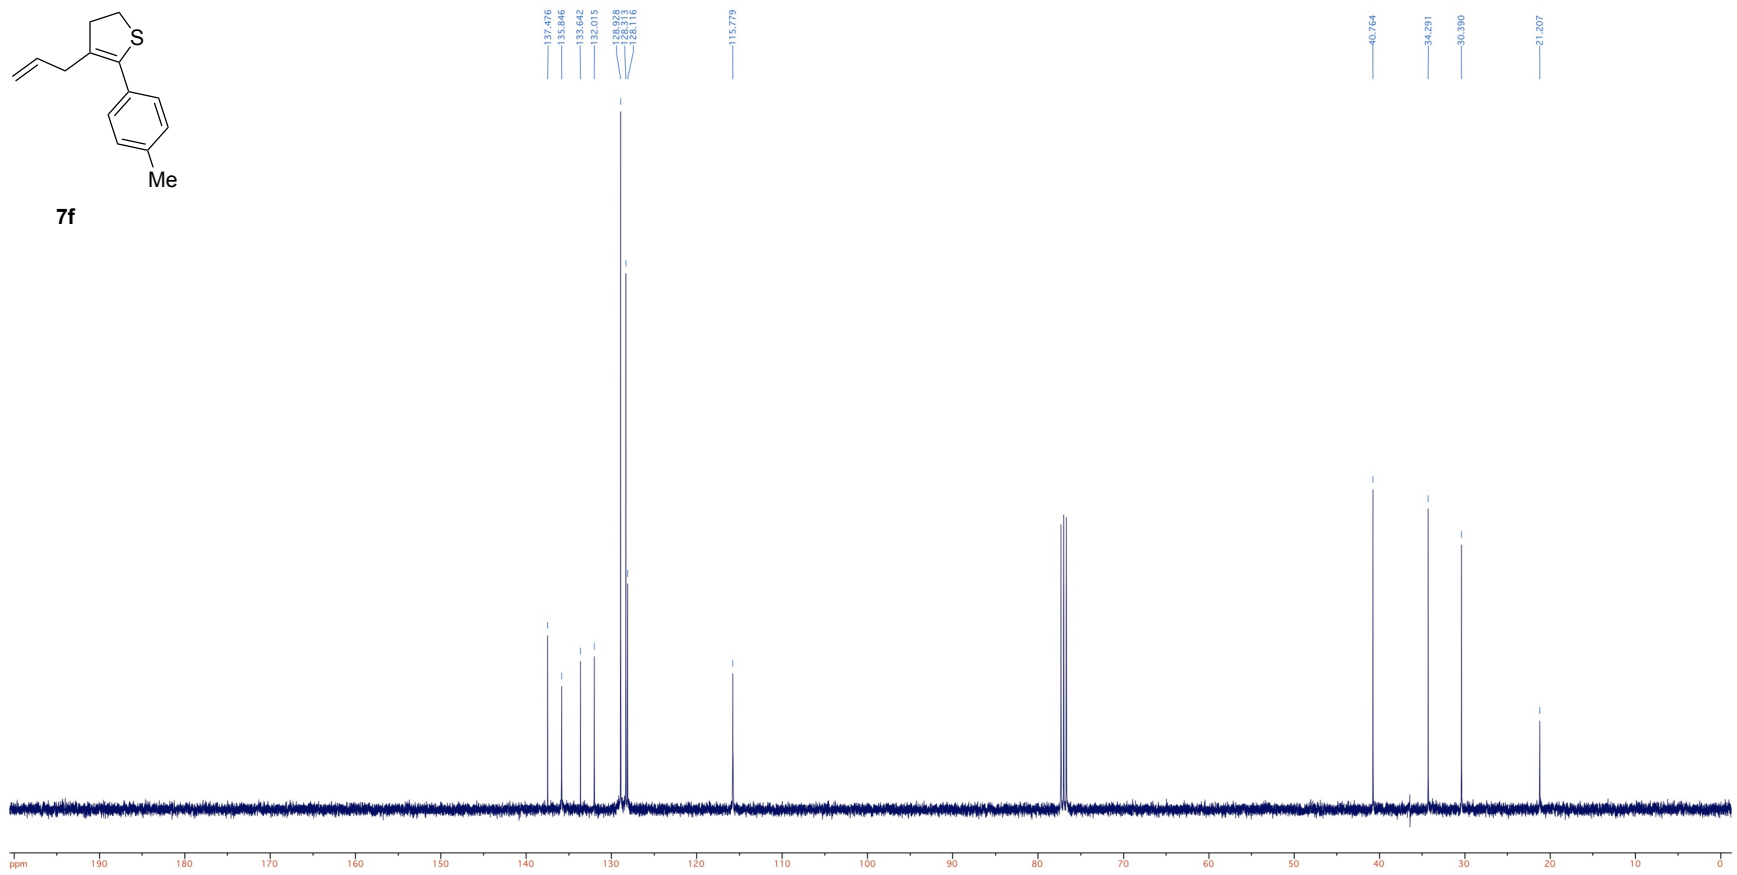

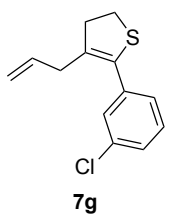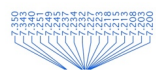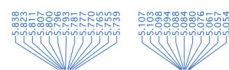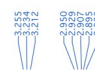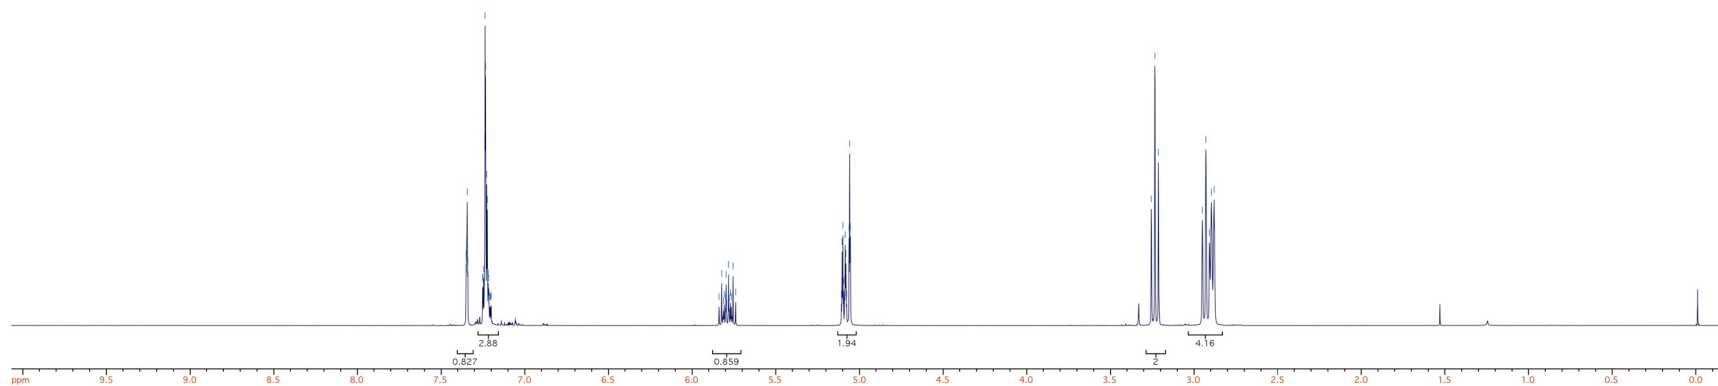

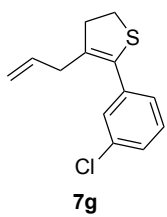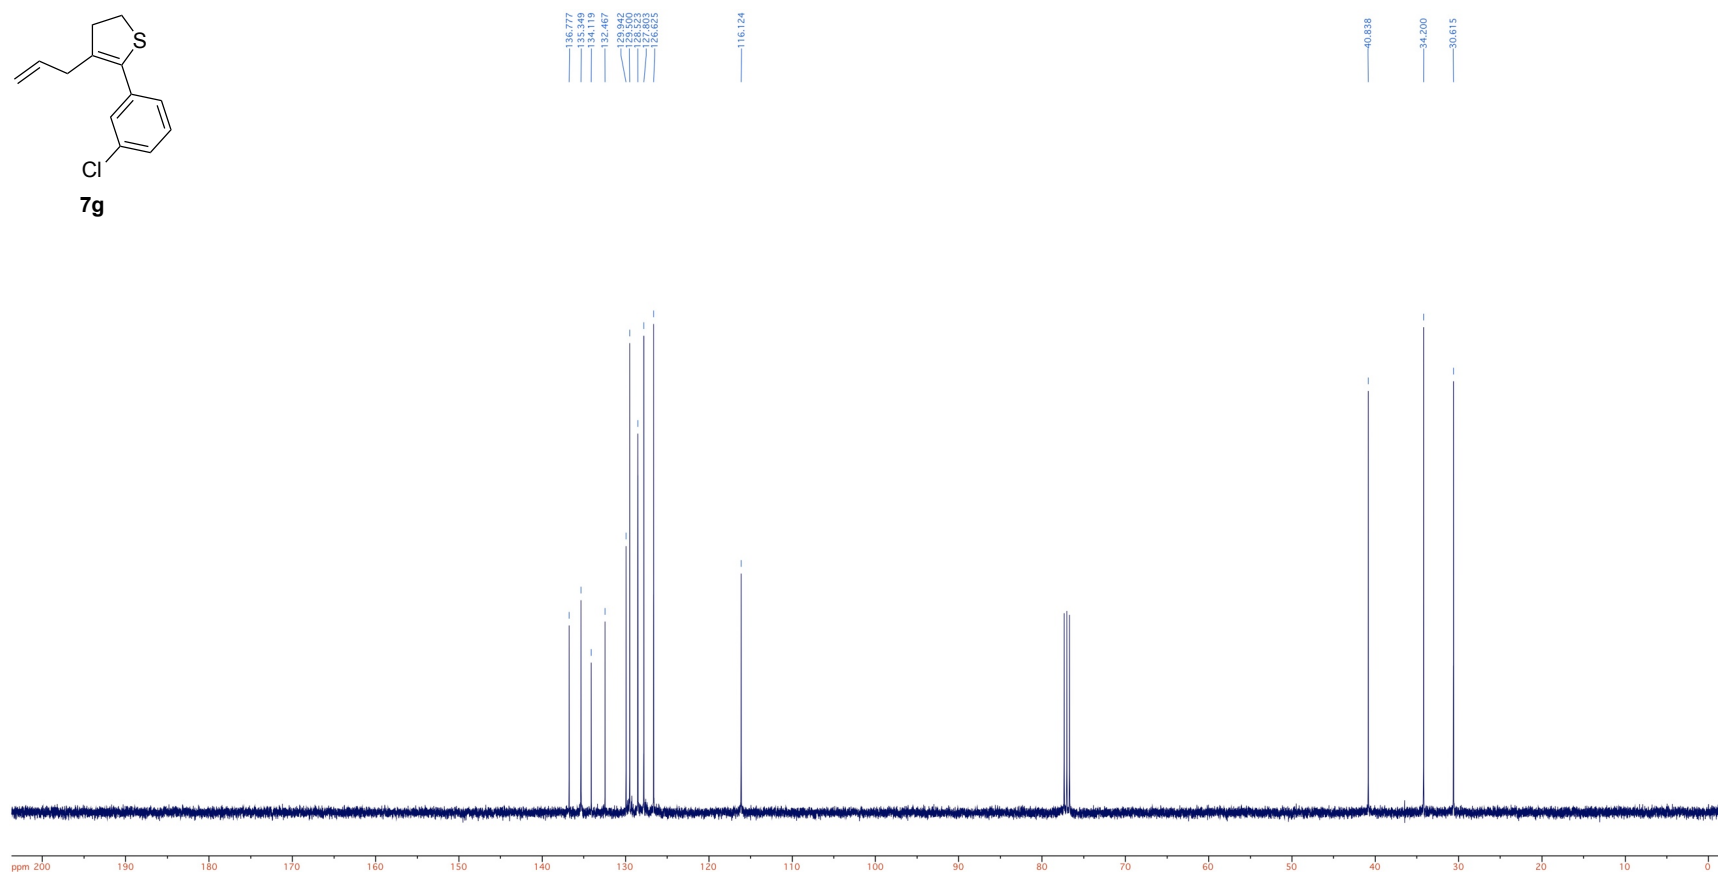



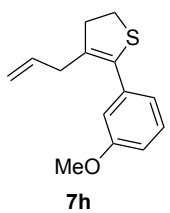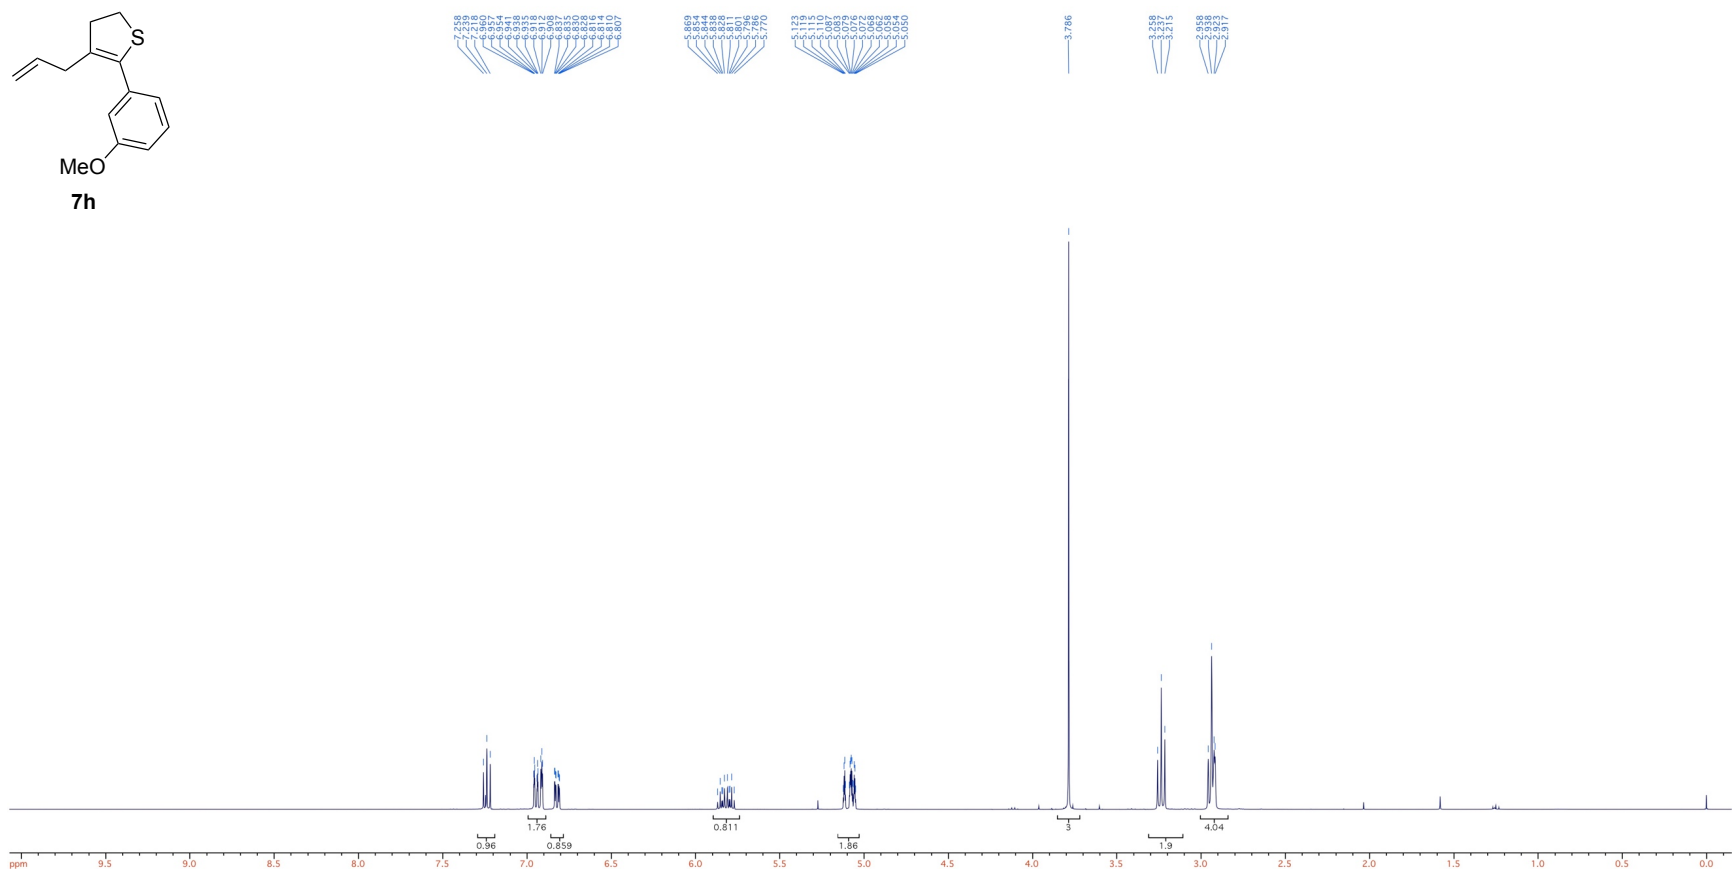

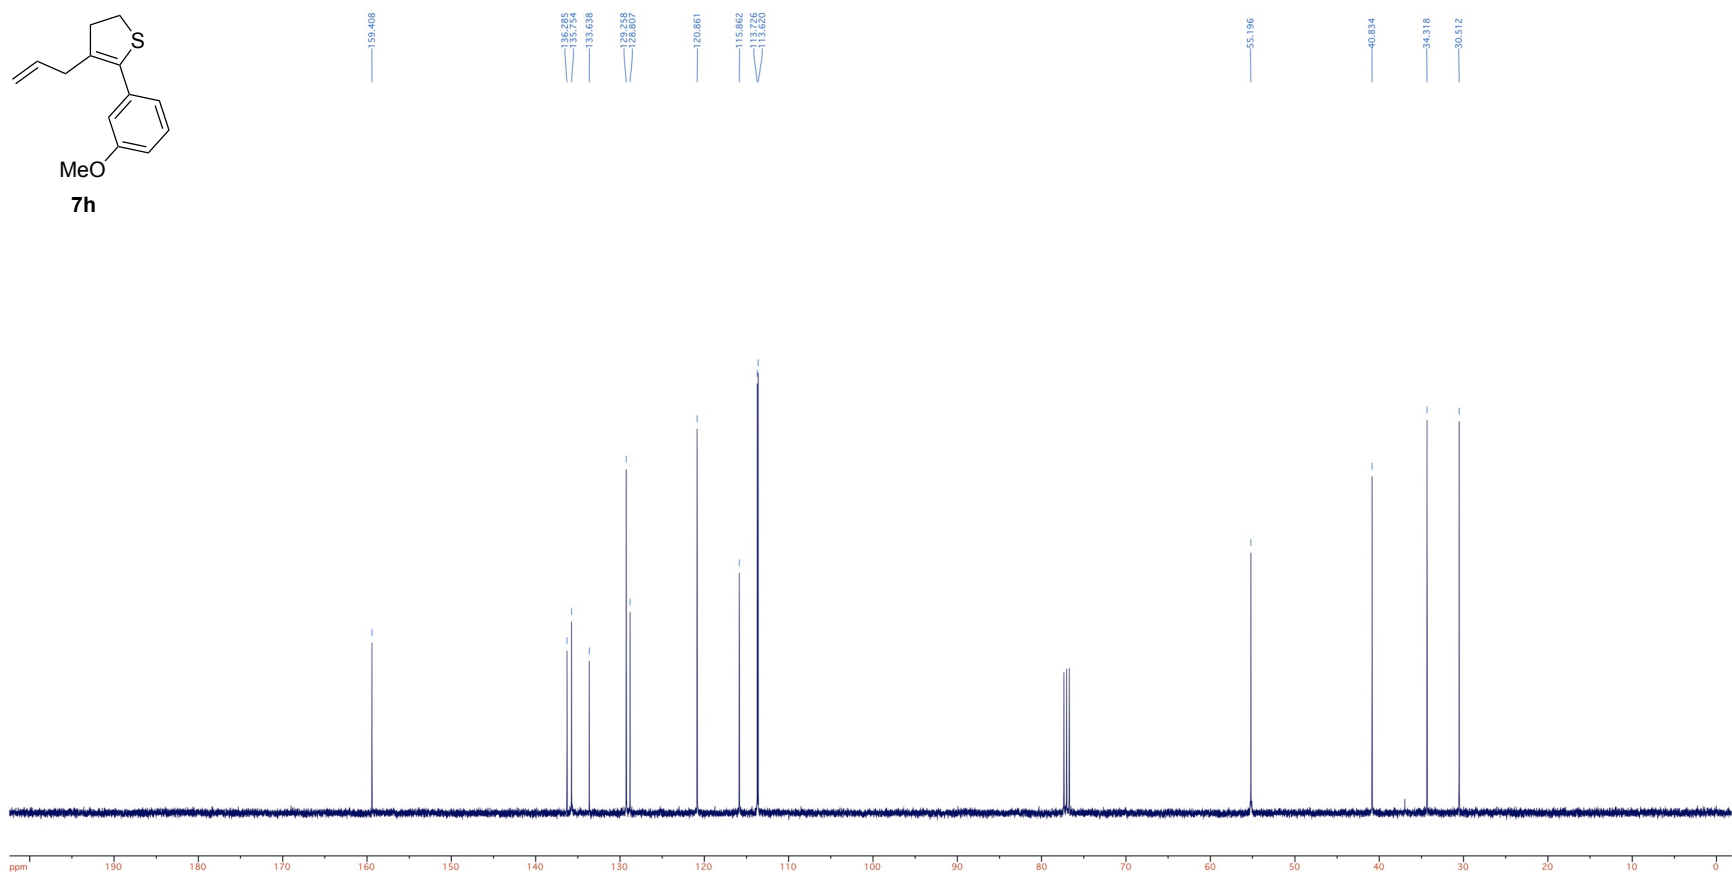



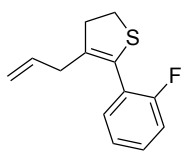

7i

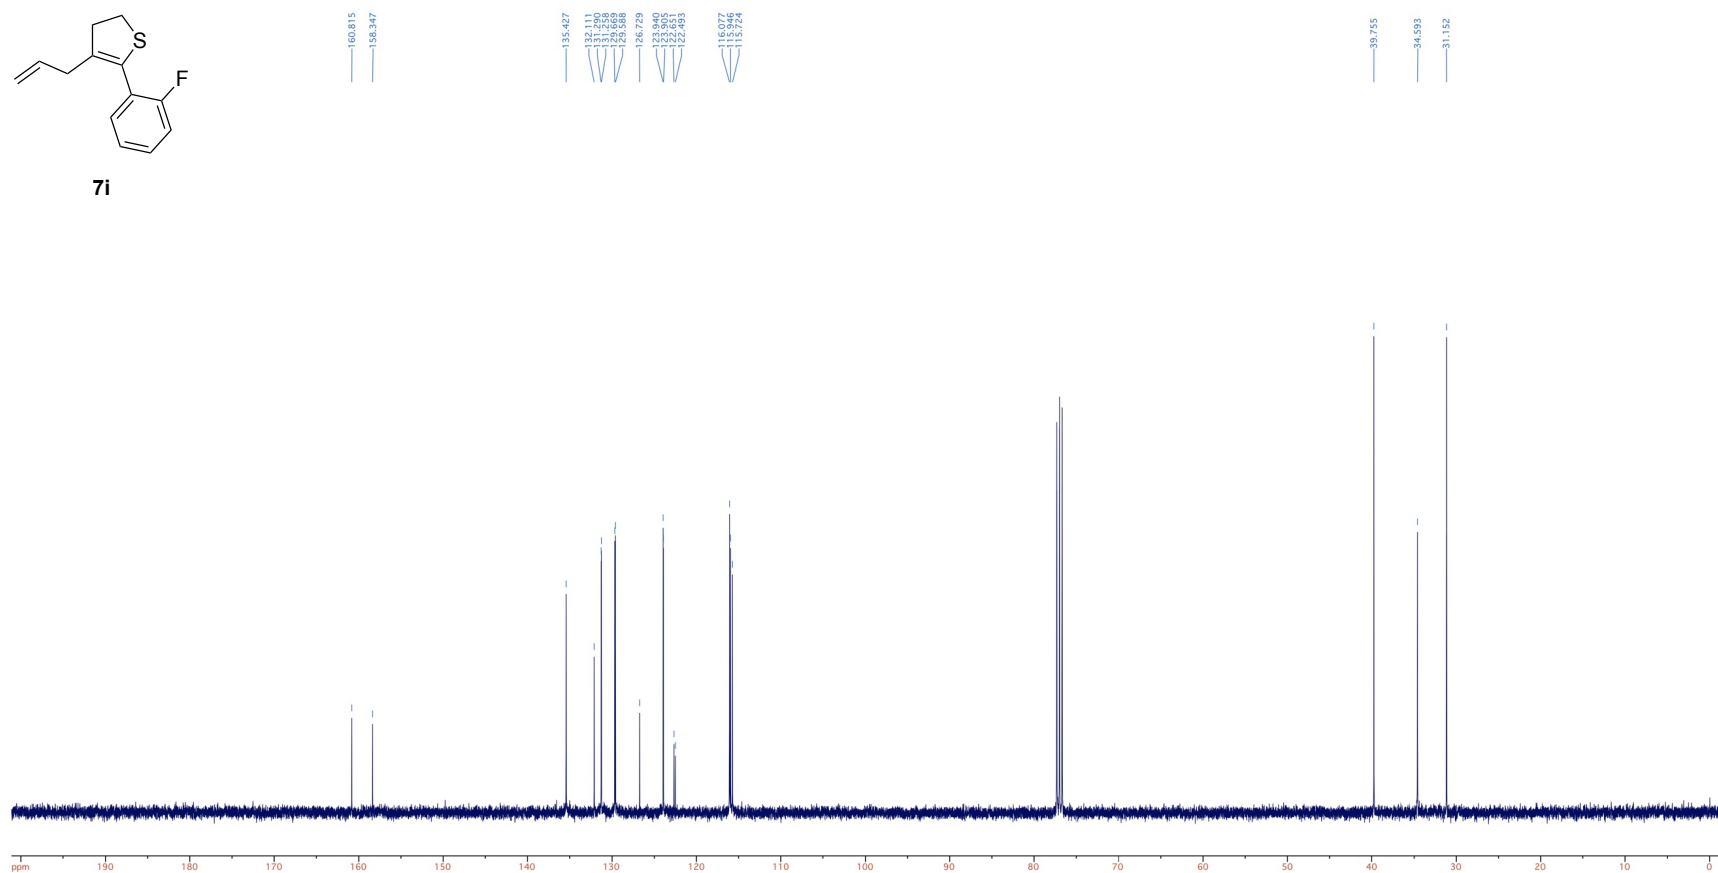

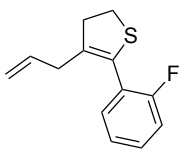

7i

119.800  
119.790  
119.780  
119.770  
119.760

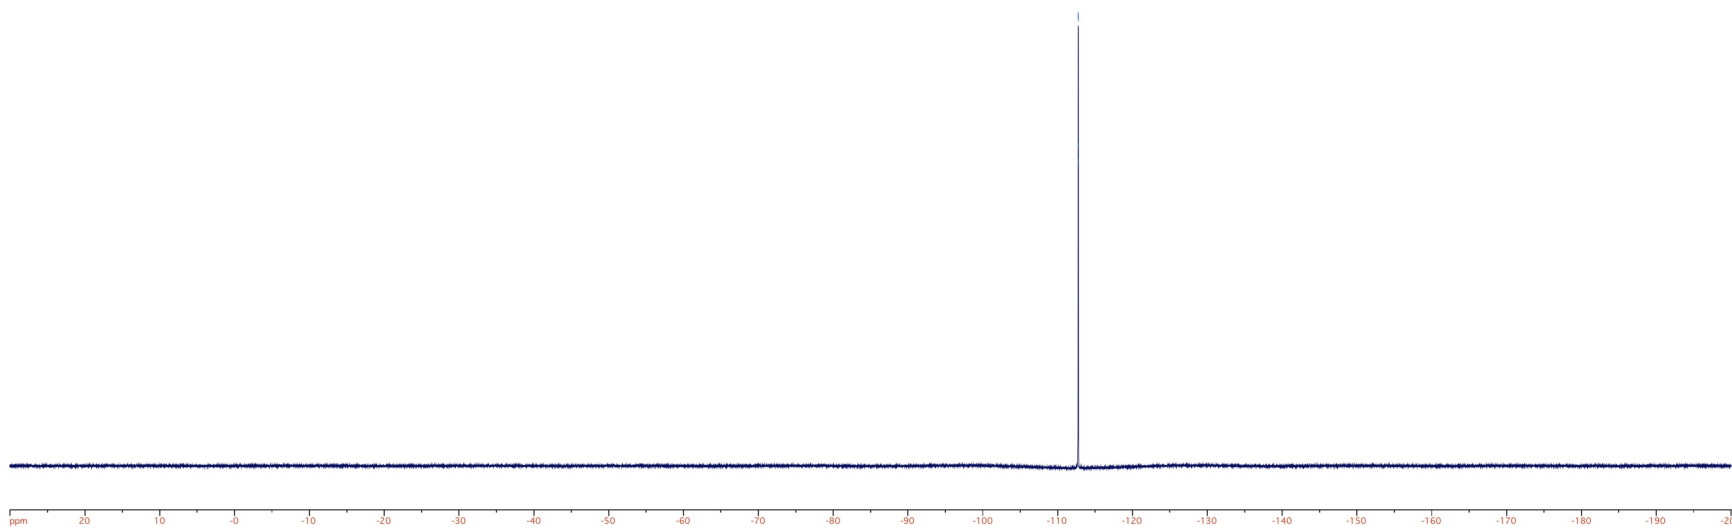

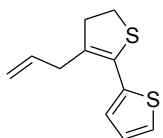

7j

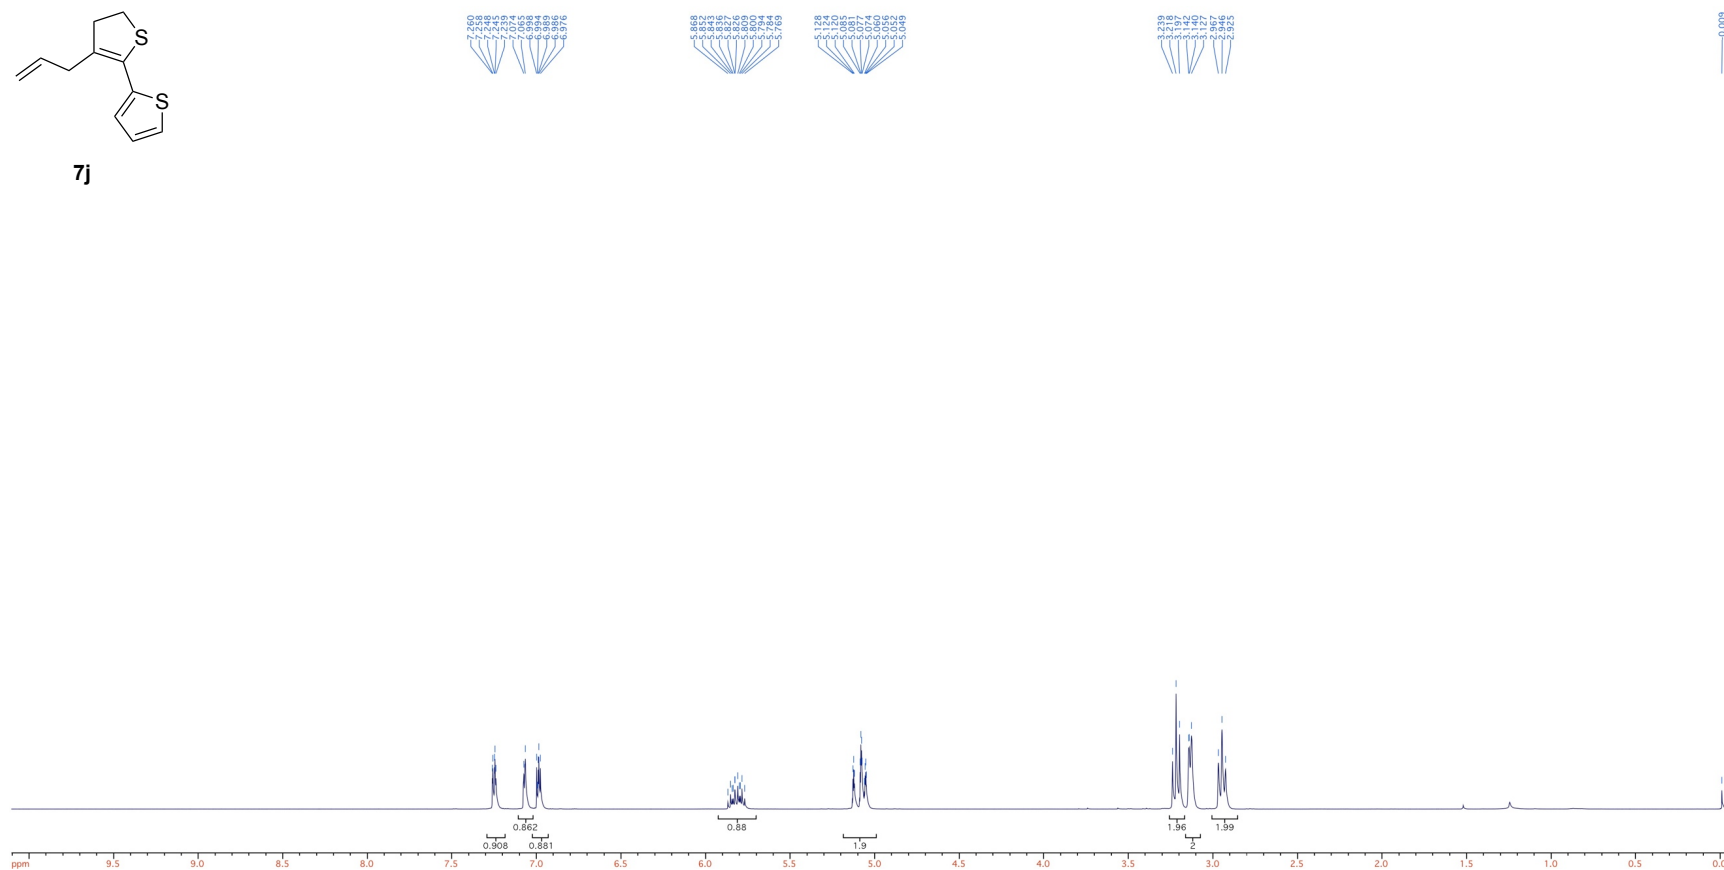

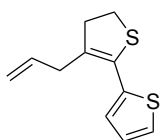

7j

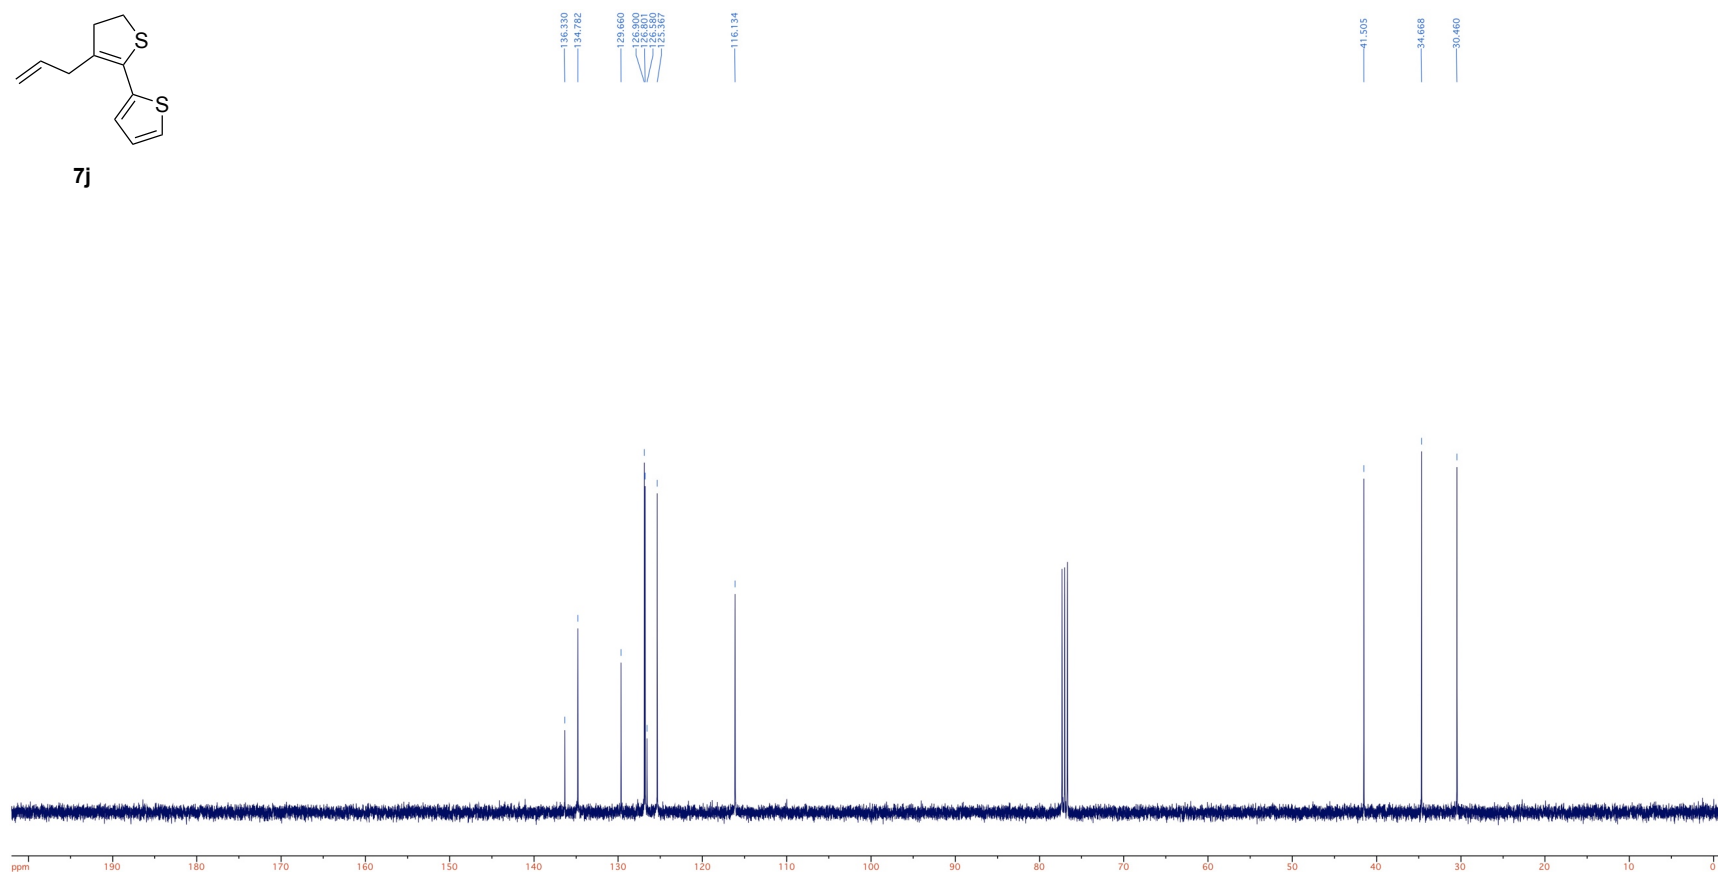

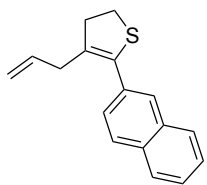

7k

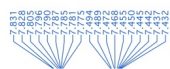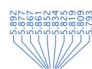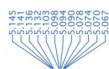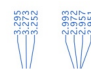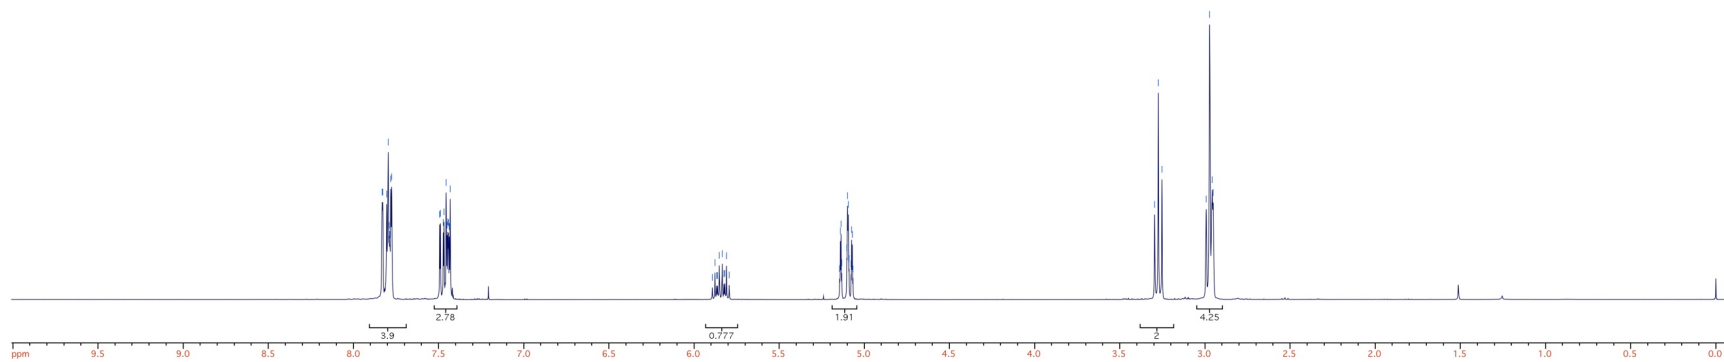



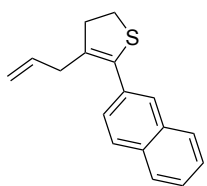

7k

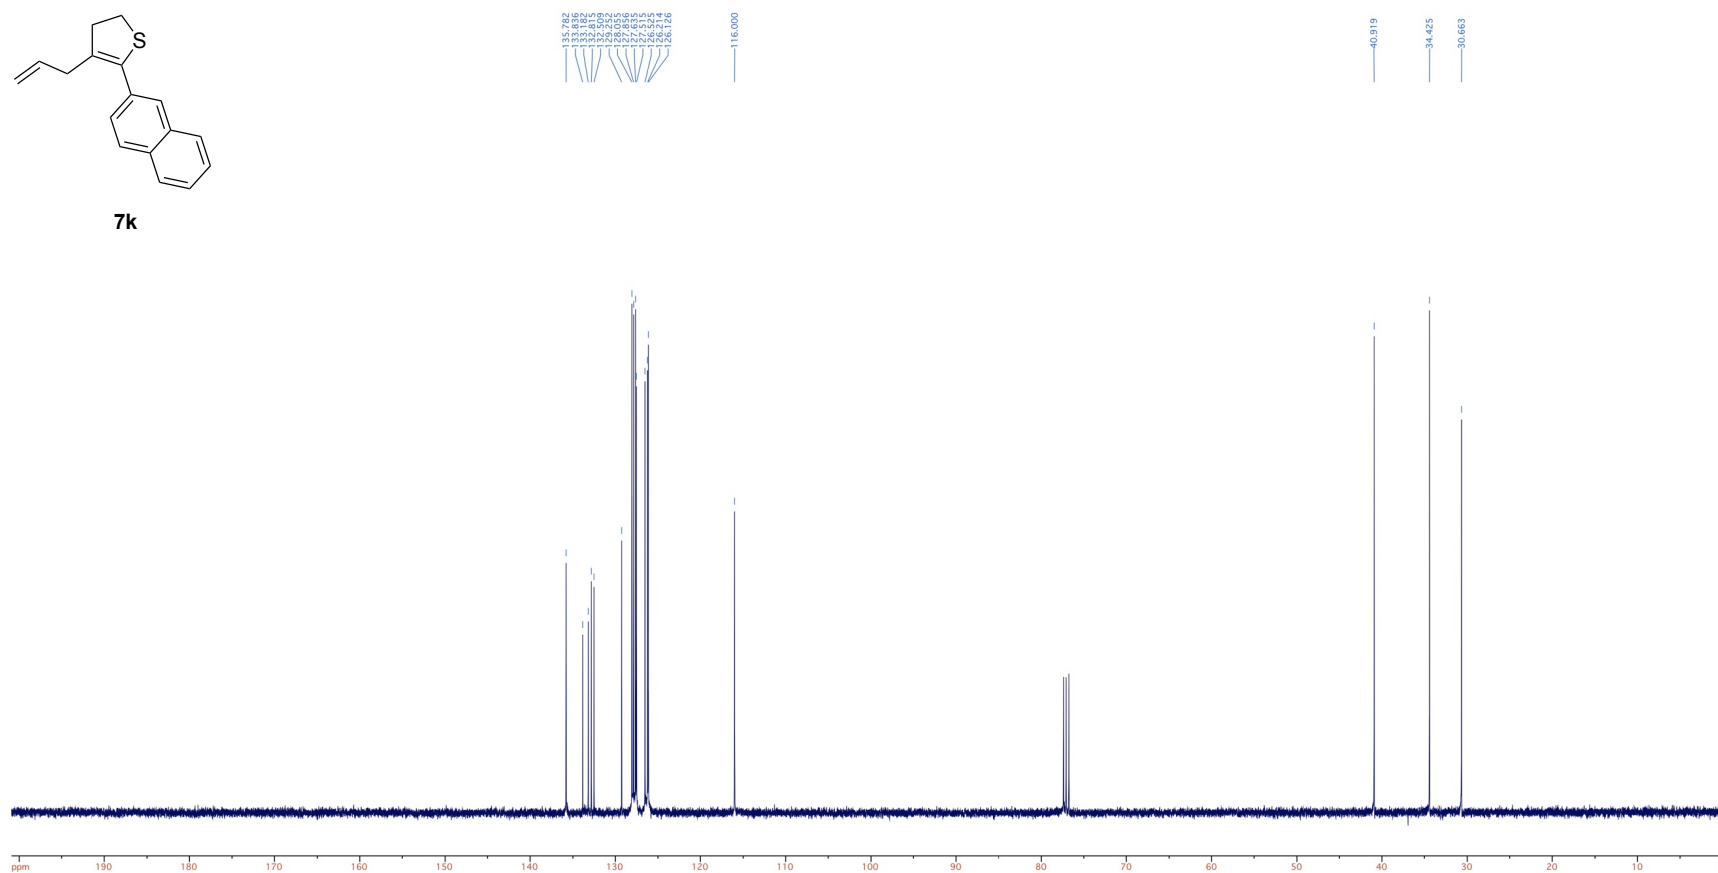

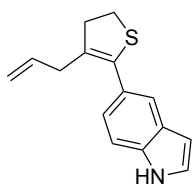

71

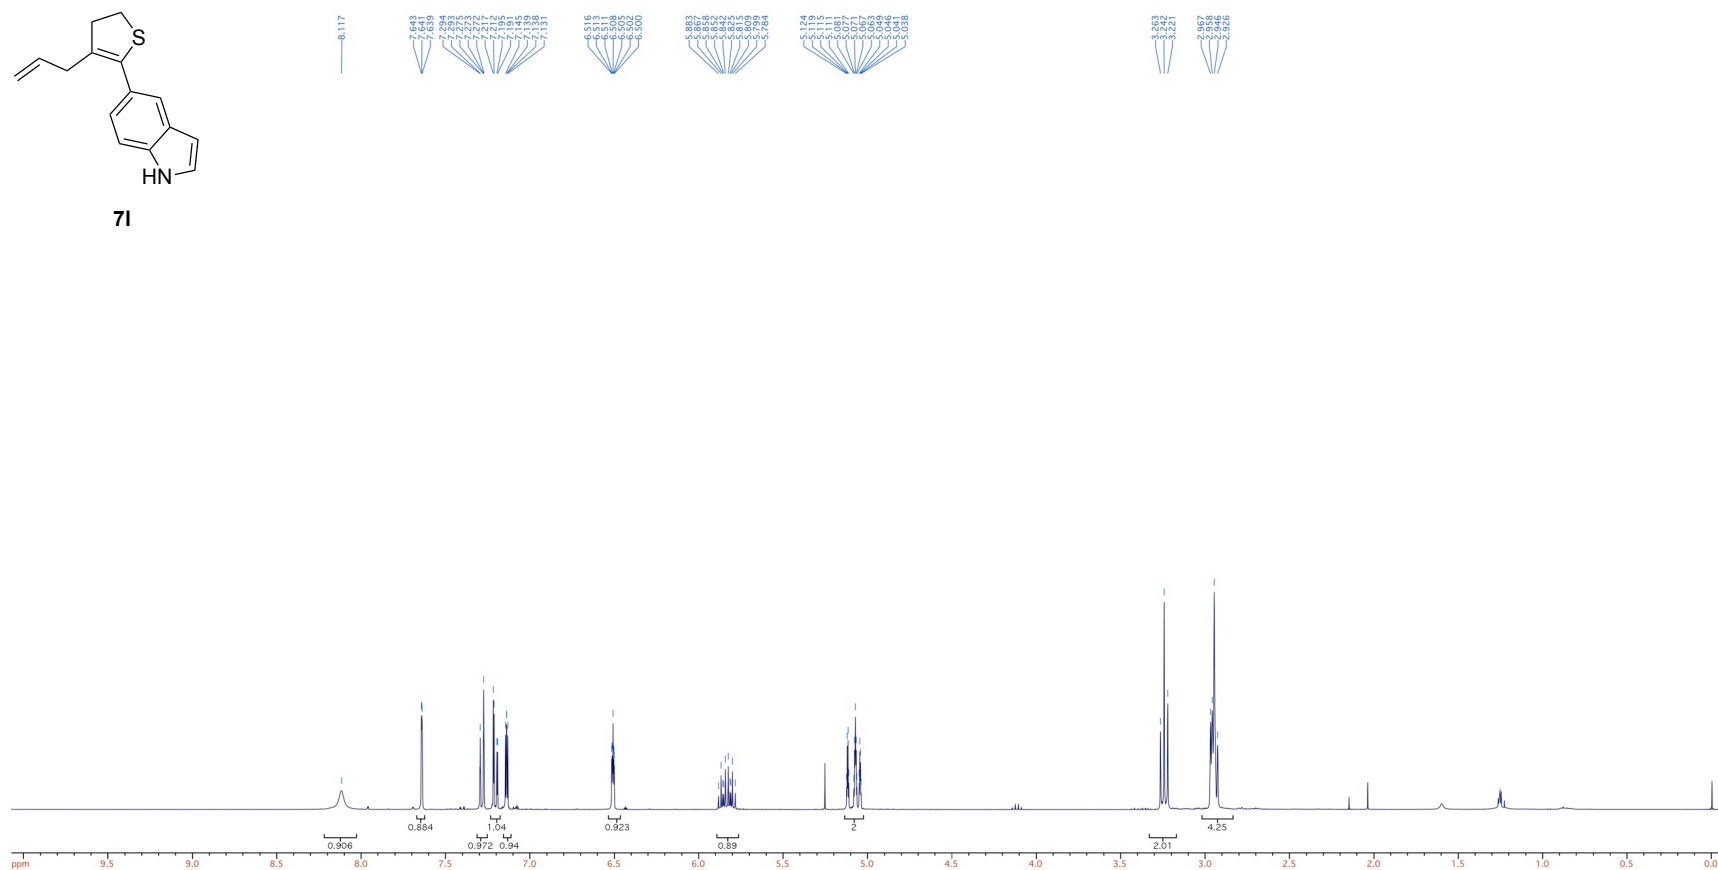

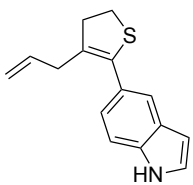

71

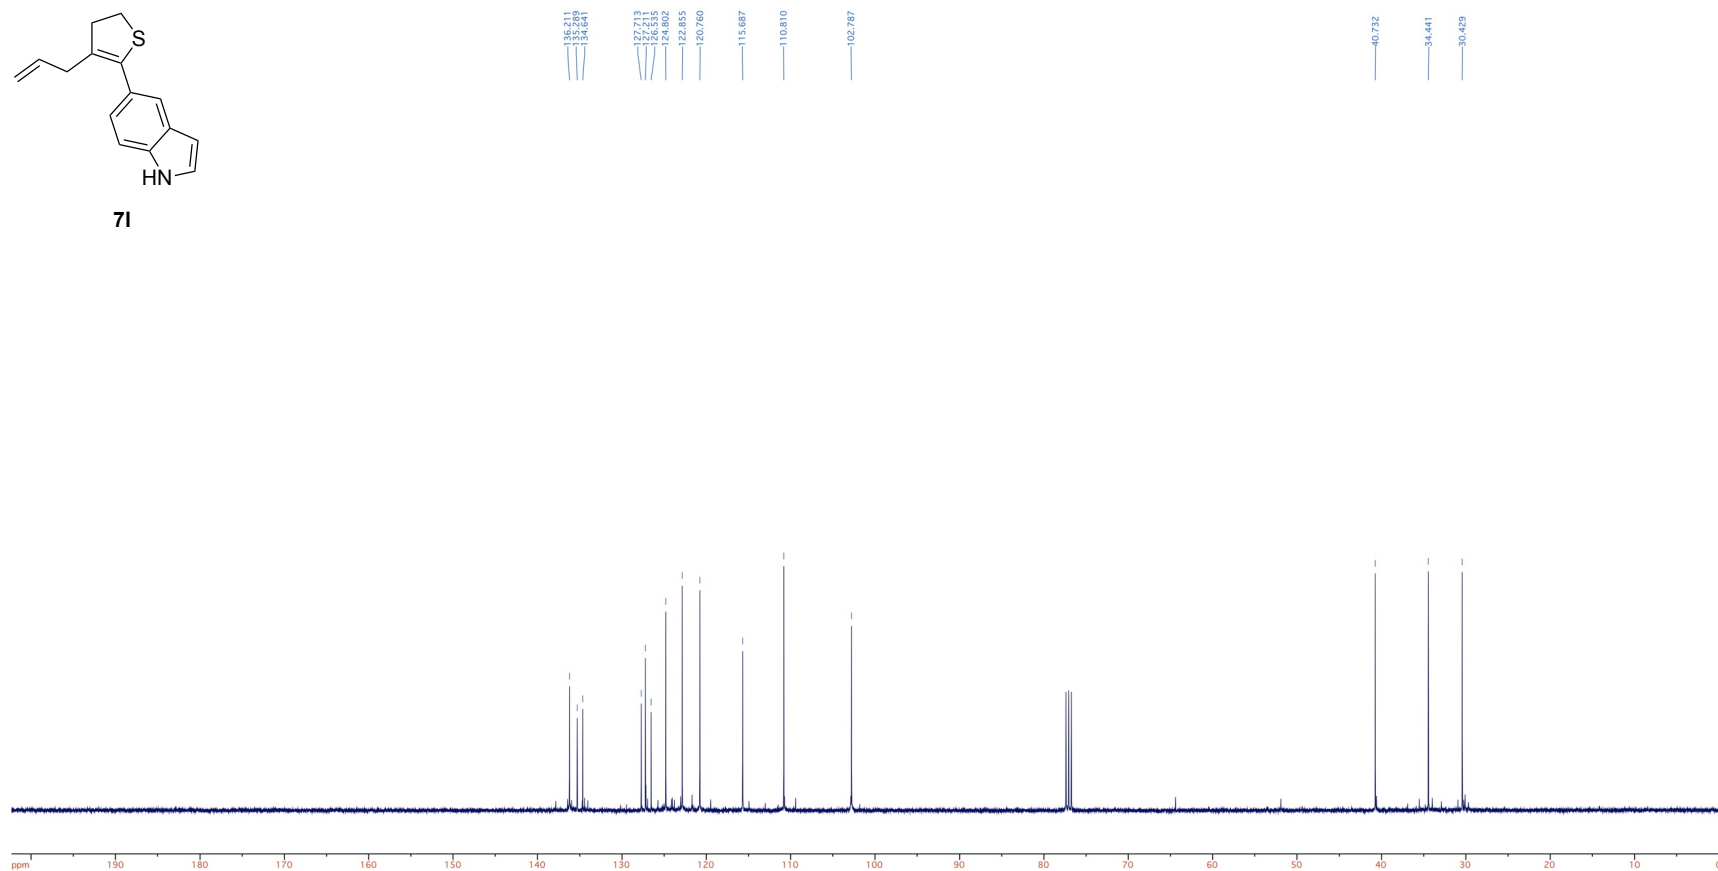

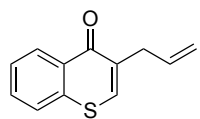

8

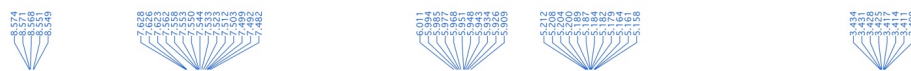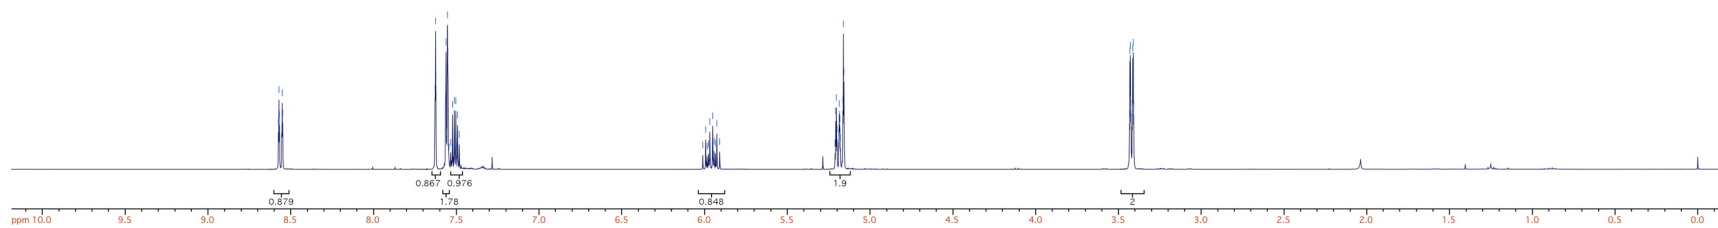

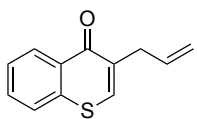

8

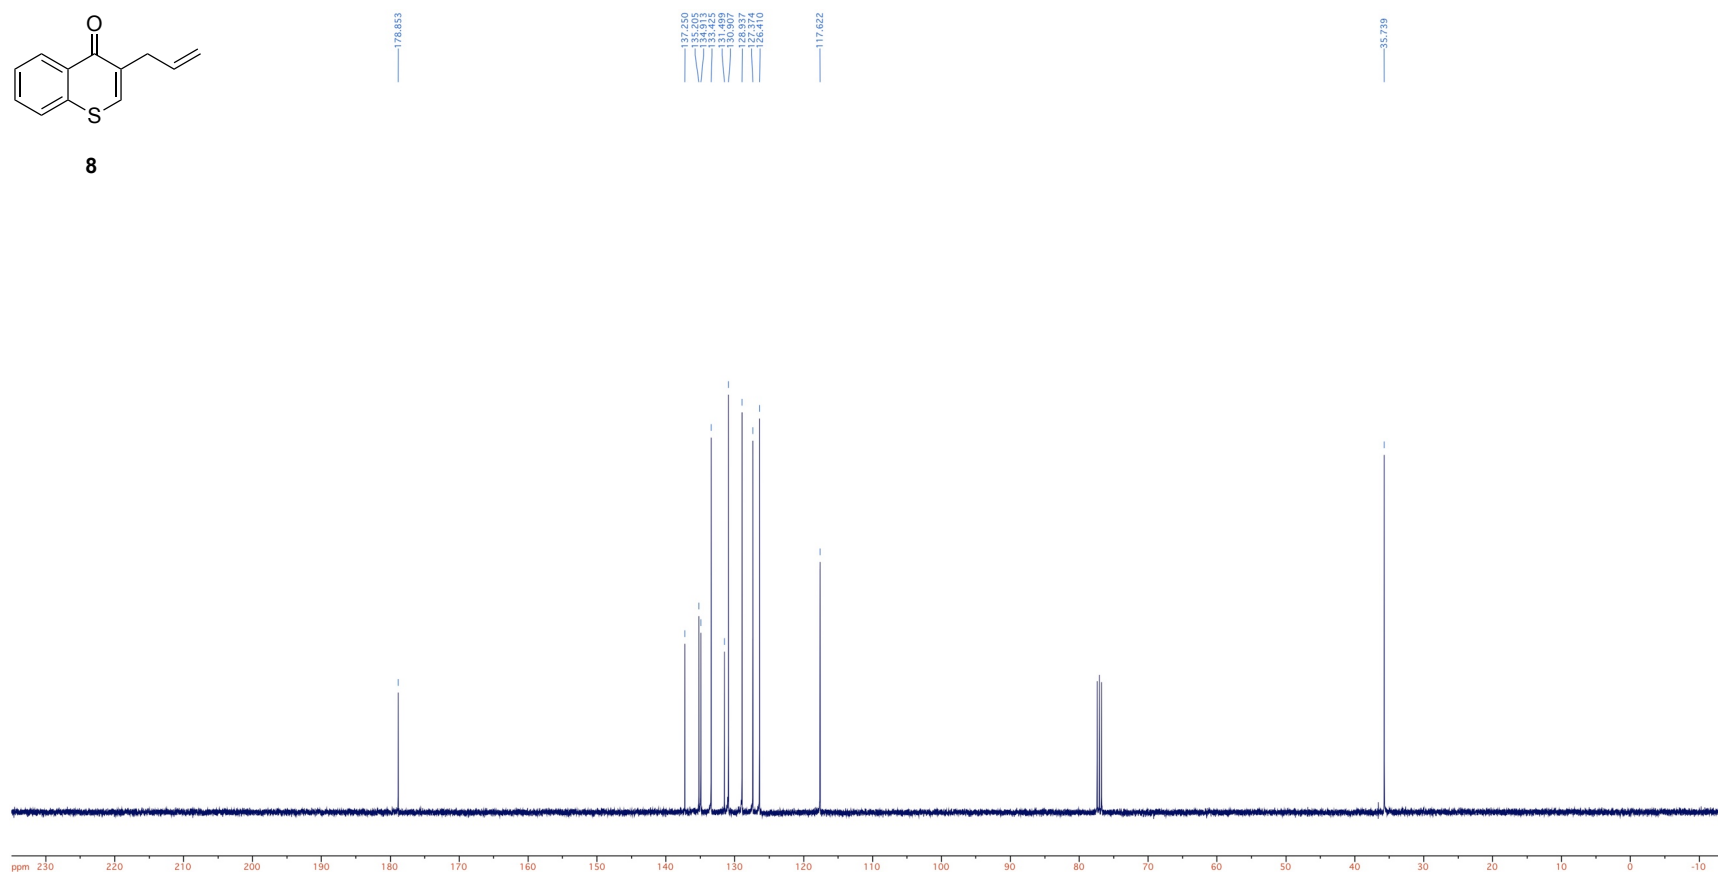

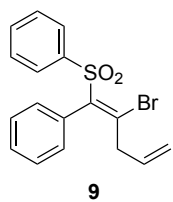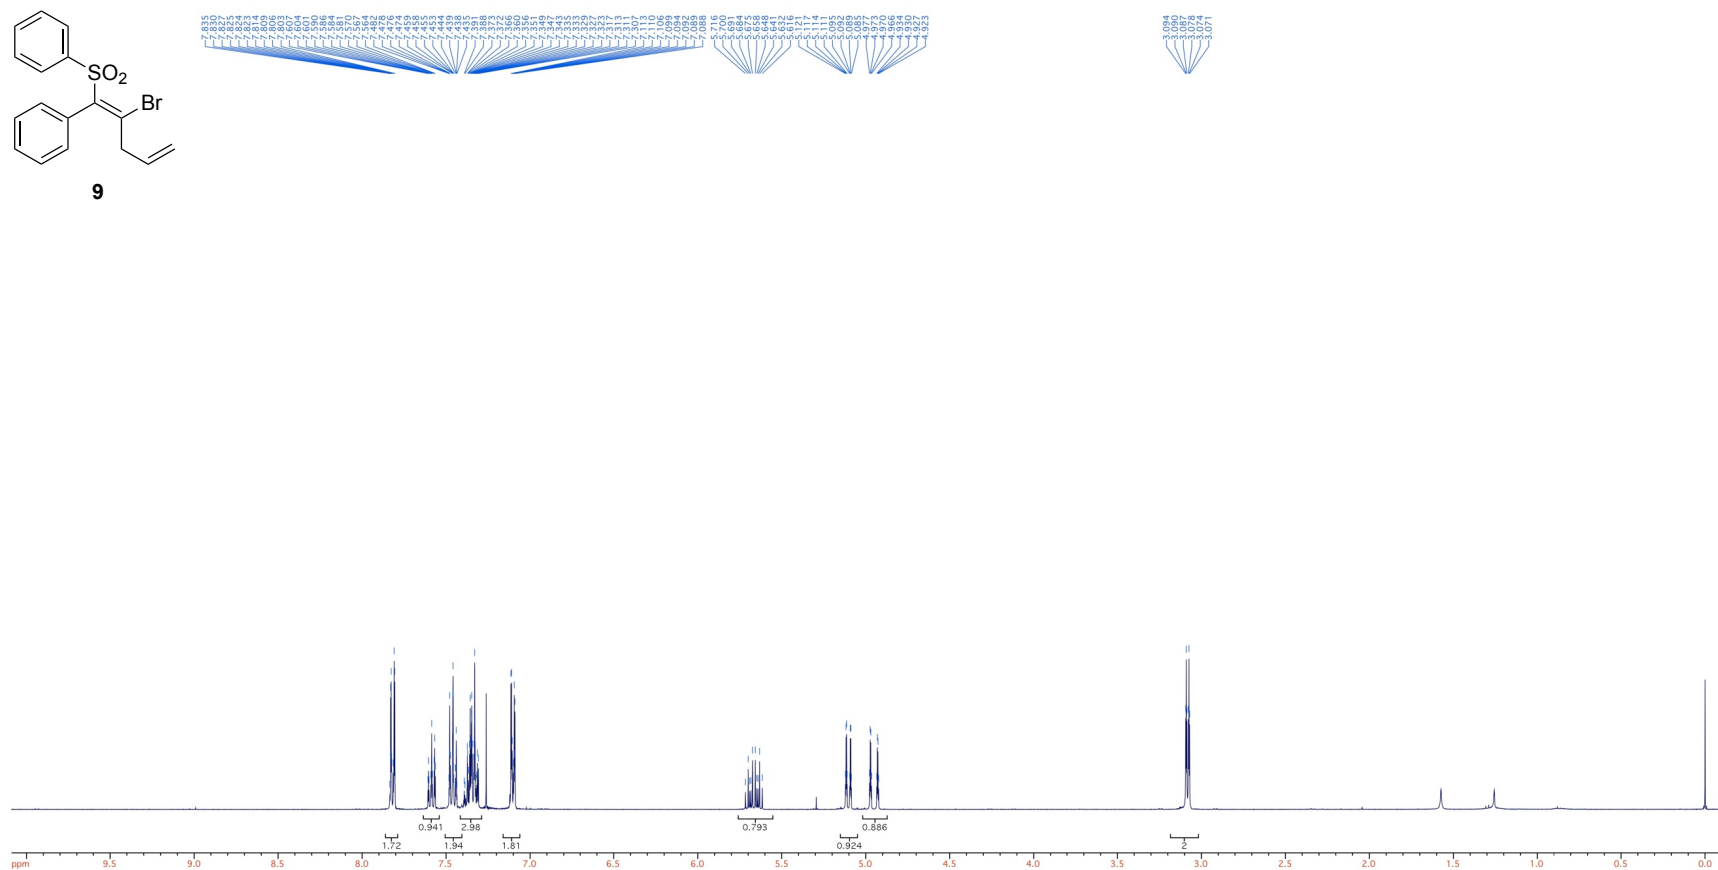

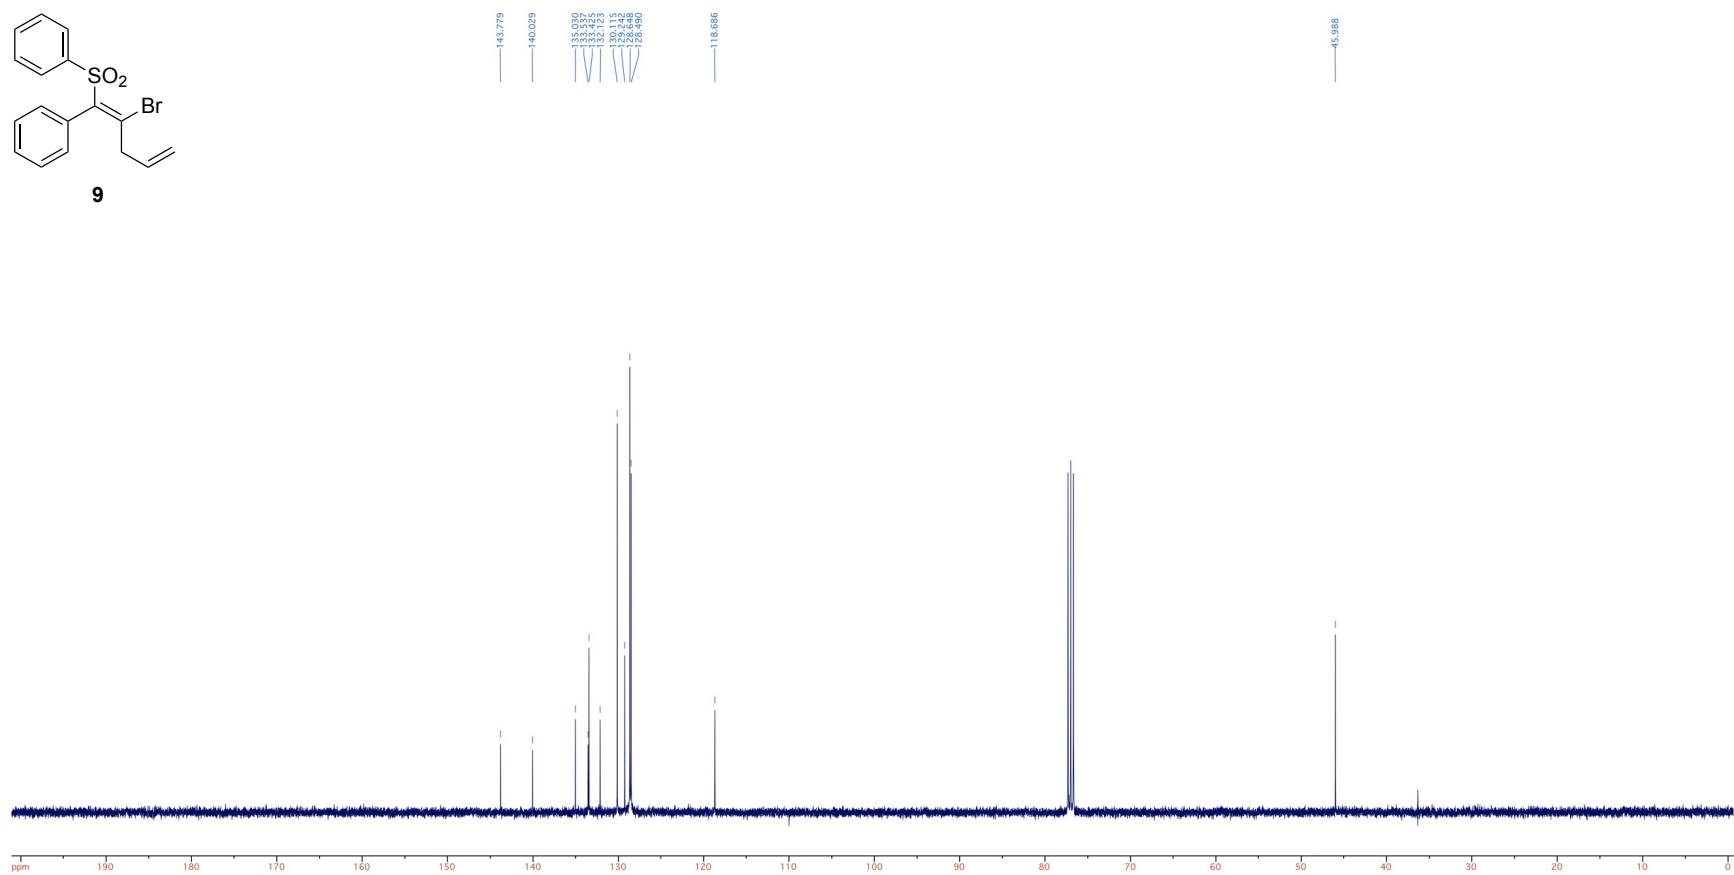





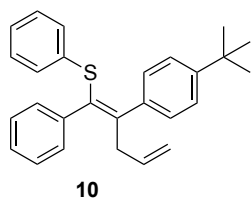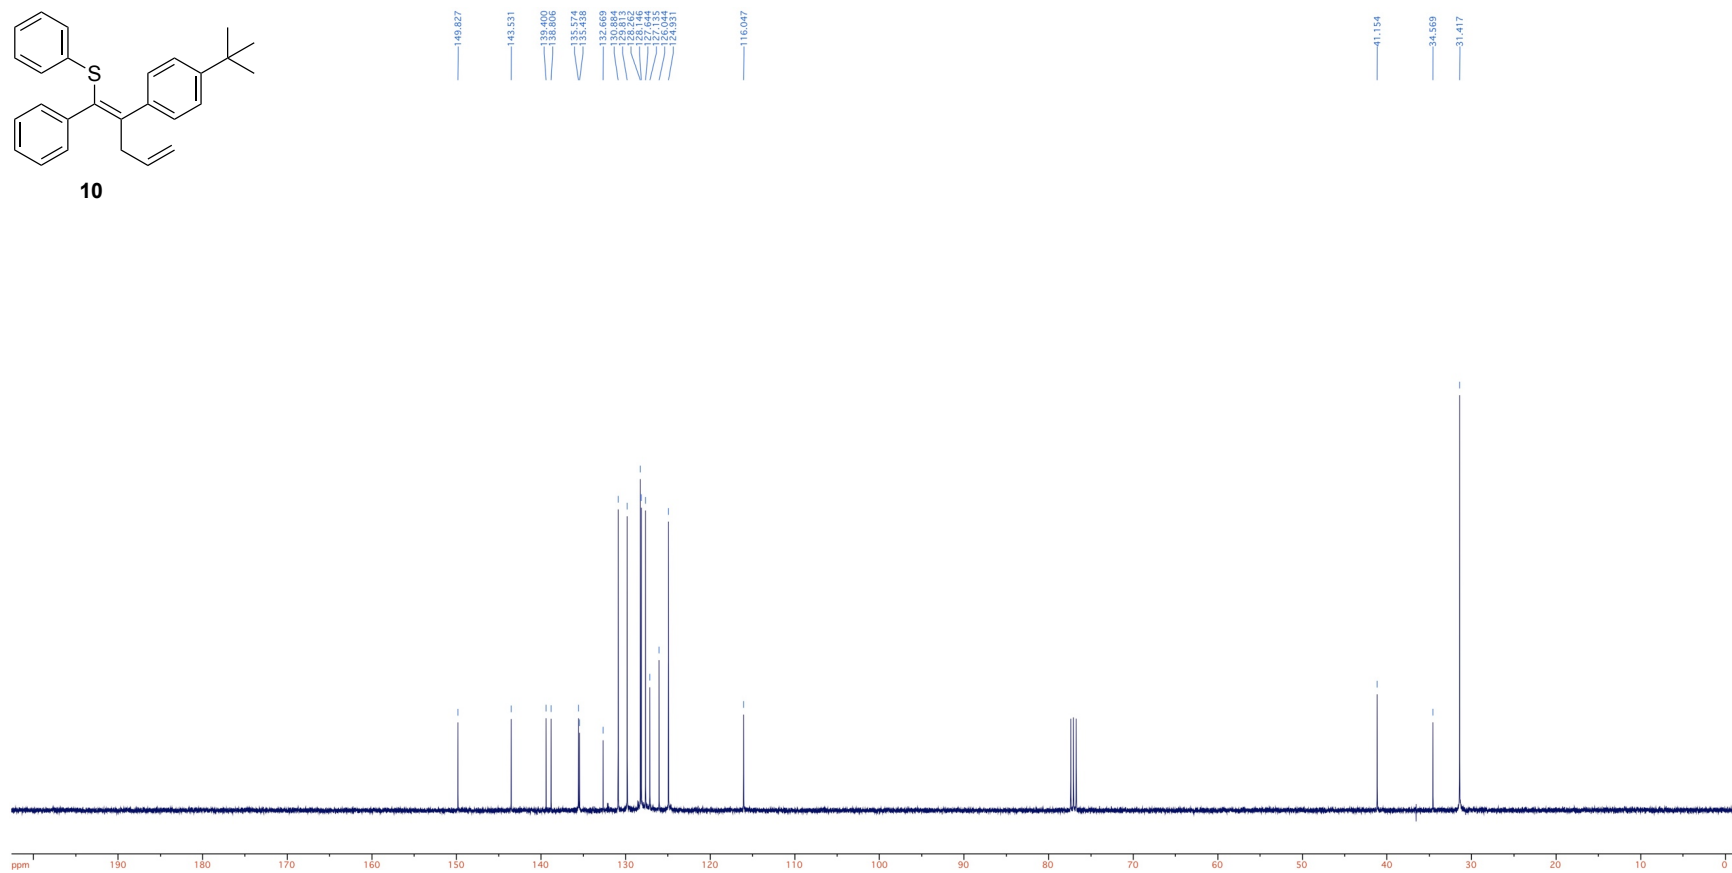

Supplement: NIHMS986283-supplement-Supporting_Information.pdf [file NIHMS986283-supplement-Supporting_Information.pdf]
